# Supplementary material for: A taxonomic monograph of the assassin bug genus Zelus Fabricius (Hemiptera: Reduviidae): 71 species based on 10,000 specimens
Source: Biodivers Data J. 2016 Jul 8;(4):e8150. doi: 10.3897/BDJ.4.e8150 (PMC5019016; doi:10.3897/BDJ.4.e8150)
Supplement: Supplementary material 1 — Specimen records of species of Zelus Fabricius, 1803 [file biodiversity_data_journal-4-e8150-s001.xls]

## Sheet: Zelus_aithaleos_PBI
typeStatus	scientificName	scientificNameAuthorship	catalogNumber	Family	genus	specificEpithet	country	stateProvince	county	locality	decimalLatitude	decimalLongitude	eventDate	recordedBy	sex	institutionCode	identifiedBy	dateIdentified	occurrenceRemarks	samplingProtocol	georeferenceSources	verbatimElevation	otherCatalogNumbers
Holotype	Zelus aithaleos	Zhang and Hart, 2016	UCR_ENT 00047314	Reduviidae	Zelus	aithaleos	PERU	Huanuco		Aerro Puerto, Tingo Maria	-9.3	-76.0167	1946-10-22	J. C. Pallister	Adult Male	AMNH	G. Zhang	2013	Holotype of Zelus aithaleos Zhang and Hart, 2016		Gazetteer	671 m
Paratype	Zelus aithaleos	Zhang and Hart, 2016	UCR_ENT 00009327	Reduviidae	Zelus	aithaleos	BOLIVIA	La Paz		Guanay	-15.4833	-67.8833	1993-10-01 to 1993-11-01	L. Pena	Adult Female	USNM	G. Zhang	2013	Paratype of Zelus aithaleos Zhang and Hart, 2016		Gazetteer
Paratype	Zelus aithaleos	Zhang and Hart, 2016	UCR_ENT 00009328	Reduviidae	Zelus	aithaleos	BOLIVIA	La Paz		Guanay	-15.4833	-67.8833	1993-10-01 to 1993-11-01	L. Pena	Adult Female	USNM	G. Zhang	2013	Paratype of Zelus aithaleos Zhang and Hart, 2016		Gazetteer
Paratype	Zelus aithaleos	Zhang and Hart, 2016	UCR_ENT 00071251	Reduviidae	Zelus	aithaleos	BRAZIL	Goias		Annapolis	-16.3333	-48.9667	1936-02-07	Unknown	Adult Female	TAMU	G. Zhang	2013	Paratype of Zelus aithaleos Zhang and Hart, 2016		Gazetteer
Paratype	Zelus aithaleos	Zhang and Hart, 2016	UCR_ENT 00071252	Reduviidae	Zelus	aithaleos	PARAGUAY	Guaira		Paso-Yobai	-25.7234	-55.9969	1951-09-28	Foerster	Adult Female	TAMU	G. Zhang	2013	Paratype of Zelus aithaleos Zhang and Hart, 2016		Google Earth	280 m
Holotype	Zelus amblycephalus	Zhang and Hart, 2016	UCR_ENT 00022669	Reduviidae	Zelus	amblycephalus	COSTA RICA	Puntarenas		Golfito	8.6407	-83.1686	1957-07-13	A. S. Menke	Adult Male	LACM	G. Zhang	2013	Holotype of Zelus amblycephalus Zhang and Hart, 2016		Google Earth		LACM ENT 160232
Paratype	Zelus amblycephalus	Zhang and Hart, 2016	UCR_ENT 00009315	Reduviidae	Zelus	amblycephalus	BRAZIL	Amazonas		Rio Janauaca, 40 km SW Manaus	-3.33333	-60.2833	1979-03-10	Unknown	Adult Male	USNM	G. Zhang	2013	Paratype of Zelus amblycephalus Zhang and Hart, 2016		Label
Paratype	Zelus amblycephalus	Zhang and Hart, 2016	UCR_ENT 00009316	Reduviidae	Zelus	amblycephalus	BRAZIL	Amazonas		Teffe	-3.3667	-64.7	1918-12-06	Unknown	Adult Male	USNM	G. Zhang	2013	Paratype of Zelus amblycephalus Zhang and Hart, 2016
Paratype	Zelus amblycephalus	Zhang and Hart, 2016	UCR_ENT 00006070	Reduviidae	Zelus	amblycephalus	BRAZIL	Mato Grosso		Barra do Tapirape	-10.4667	-50.5167	1962-12-30	B. Malkin	Adult Male	CAS	G. Zhang	2013	Paratype of Zelus amblycephalus Zhang and Hart, 2016		Gazetteer
Paratype	Zelus amblycephalus	Zhang and Hart, 2016	UCR_ENT 00029368	Reduviidae	Zelus	amblycephalus	BRAZIL	Rondonia		62 km SW of Ariquemes, near Fzda. Rancho Grande	-10.3292	-63.4688	1996-12-03 to 1996-12-15	J. E. Eger	Adult Male	USNM	G. Zhang	2013	Paratype of Zelus amblycephalus Zhang and Hart, 2016. Drake Collection
Paratype	Zelus amblycephalus	Zhang and Hart, 2016	UCR_ENT 00025328	Reduviidae	Zelus	amblycephalus	COLOMBIA	Cundinamarca		Villeta	5.01444	-74.4731	2003-05-10	C. Ardila, A. Montano, A. Pachon	Adult Male	UNAB	G. Zhang	2013	Paratype of Zelus amblycephalus Zhang and Hart, 2016		Label	799 m
Paratype	Zelus amblycephalus	Zhang and Hart, 2016	UCR_ENT 00022670	Reduviidae	Zelus	amblycephalus	COSTA RICA	Puntarenas		Golfito	8.6407	-83.1686	1957-07-13	A. S. Menke	Adult Female	LACM	G. Zhang	2013	Paratype of Zelus amblycephalus Zhang and Hart, 2016. Previously designated as 'allotype' of his manuscript name Zelus amblycephalus by Hart, a type status not used in the formal publication of this name (Zhang, Hart & Weirauch, 2016).		Google Earth		LACM ENT 160233
Paratype	Zelus amblycephalus	Zhang and Hart, 2016	UCR_ENT 00009473	Reduviidae	Zelus	amblycephalus	ECUADOR	Orellana		Reserva Etnica Waorani, 1 km S. Onkone Gare Camp, Transect Ent.	-0.65714	-76.453	1994-10-09	T. L. Erwin et al.	Adult Male	USNM	G. Zhang	2013	Paratype of Zelus amblycephalus Zhang and Hart, 2016	Fogging	Label	216 m
Paratype	Zelus amblycephalus	Zhang and Hart, 2016	UCR_ENT 00010840	Reduviidae	Zelus	amblycephalus	MEXICO	Chiapas		10 m N of Mexico 190 Tuztla Gutierrez	16.9057	-93.1649	1956-08-24 to 1956-08-28	A. Lewis	Adult Male	LACM	G. Zhang	2013	Paratype of Zelus amblycephalus Zhang and Hart, 2016		Google Earth
Paratype	Zelus amblycephalus	Zhang and Hart, 2016	UCR_ENT 00034277	Reduviidae	Zelus	amblycephalus	MEXICO	Chiapas		Reserva El Ocote	16.995	-93.6406	1993-12-02 to 1993-12-10	G. Ortega, E. Barrera, A. Casasola	Adult Female	IBUNAM	G. Zhang	2013	Paratype of Zelus amblycephalus Zhang and Hart, 2016		Google Earth
Paratype	Zelus amblycephalus	Zhang and Hart, 2016	UCR_ENT 00009493	Reduviidae	Zelus	amblycephalus	MEXICO	Oaxaca		Temascal	18.2388	-96.4003	1963-10-31	D.H. Jansen	Adult Male	USNM	G. Zhang	2013	Paratype of Zelus amblycephalus Zhang and Hart, 2016. Drake Collection
Paratype	Zelus amblycephalus	Zhang and Hart, 2016	UCR_ENT 00009494	Reduviidae	Zelus	amblycephalus	MEXICO	Oaxaca		Temascal	18.2388	-96.4003	1963-10-31	D.H. Jansen	Adult Male	USNM	G. Zhang	2013	Paratype of Zelus amblycephalus Zhang and Hart, 2016. Drake Collection
Paratype	Zelus amblycephalus	Zhang and Hart, 2016	UCR_ENT 00009495	Reduviidae	Zelus	amblycephalus	MEXICO	Oaxaca		Temascal	18.2388	-96.4003	1963-10-31	D.H. Jansen	Adult Male	USNM	G. Zhang	2013	Paratype of Zelus amblycephalus Zhang and Hart, 2016. Drake Collection
Paratype	Zelus amblycephalus	Zhang and Hart, 2016	UCR_ENT 00009496	Reduviidae	Zelus	amblycephalus	MEXICO	Oaxaca		Temascal	18.2388	-96.4003	1963-10-31	D.H. Jansen	Adult Male	USNM	G. Zhang	2013	Paratype of Zelus amblycephalus Zhang and Hart, 2016. Drake Collection
Paratype	Zelus amblycephalus	Zhang and Hart, 2016	UCR_ENT 00009497	Reduviidae	Zelus	amblycephalus	MEXICO	Oaxaca		Temascal	18.2388	-96.4003	1963-10-31	D.H. Jansen	Adult Male	USNM	G. Zhang	2013	Paratype of Zelus amblycephalus Zhang and Hart, 2016. Drake Collection
Paratype	Zelus amblycephalus	Zhang and Hart, 2016	UCR_ENT 00009270	Reduviidae	Zelus	amblycephalus	PANAMA	Canal Zone		Barro Colorado	9.16666	-79.8333	1941-04-01	J. Zetek	Adult Male	USNM	G. Zhang	2013	Paratype of Zelus amblycephalus Zhang and Hart, 2016. Additional label: Collected at Night.		Google Earth		41-7231
Paratype	Zelus amblycephalus	Zhang and Hart, 2016	UCR_ENT 00023698	Reduviidae	Zelus	amblycephalus	SURINAME	Unknown		unknown	5.80416	-55.1499	1965-12-12	Geyskes	Adult sex unknown	RMNH	G. Zhang	2013	Paratype of Zelus amblycephalus Zhang and Hart, 2016
Lectotype	Zelus ambulans	Stål, 1862	UCR_ENT 00040998	Reduviidae	Zelus	ambulans	MEXICO	unknown					No date provided	Salle	Adult Male	NHRS	G. Zhang	2012	Lectotype of Zelus ambulans Stål, 1862. New Designation by Zhang, Hart & Weirauch (2016). Verbatim label info: Mexico / Salle / ambulans Stal. / Lectotype Zelus ambulans Stal / designated by E. R. Hart / Typus / NHRS-GULI 000000318				NHRS-GULI 000000318
Paralectotype	Zelus ambulans	Stål, 1862		Reduviidae	Zelus	ambulans	MEXICO	unknown					No date provided	Salle	Adult Male	NHRS			Paralectotype of Zelus ambulans Stål, 1862. New Designation by Zhang, Hart & Weirauch (2016). Verbatim label info: Mexico / Salle / Allotypus / Zelus ambulans Stal
Paralectotype	Zelus ambulans	Stål, 1862		Reduviidae	Zelus	ambulans	MEXICO	unknown					No date provided	Signoret	Adult Male	NHMW			Paralectotype of Zelus ambulans Stål, 1862. New Designation by Zhang, Hart & Weirauch (2016). Verbatim label info: Mexico Coll. Signoret / det. Stal
Other material	Zelus ambulans	Stål, 1862	UCR_ENT 00031098	Reduviidae	Zelus	ambulans	BELIZE	unknown		San Antonio	16.2456	-89.0239	1931-07-11	J. J. White	Adult Male	USNM	G. Zhang	2012			Google Earth
Other material	Zelus ambulans	Stål, 1862	UCR_ENT 00031103	Reduviidae	Zelus	ambulans	BELIZE	unknown		San Antonio	16.2456	-89.0239	1931-07-11	J. J. White	Adult Male	USNM	G. Zhang	2012			Google Earth
Other material	Zelus ambulans	Stål, 1862	UCR_ENT 00031104	Reduviidae	Zelus	ambulans	BELIZE	unknown		San Antonio	16.2456	-89.0239	1931-07-12	J. J. White	Adult Male	USNM	G. Zhang	2012			Google Earth
Other material	Zelus ambulans	Stål, 1862	UCR_ENT 00031111	Reduviidae	Zelus	ambulans	BELIZE	unknown		San Antonio	16.2456	-89.0239	1931-07-11	J. J. White	Adult Female	USNM	G. Zhang	2012			Google Earth
Other material	Zelus ambulans	Stål, 1862	UCR_ENT 00010839	Reduviidae	Zelus	ambulans	COSTA RICA	Alajuela		Volcan Poas	10.1857	-84.2387	1963-07-09 to 1963-07-10	C. L. Hogue	Adult Female	LACM	G. Zhang	2012			Google Earth	2500 m
Other material	Zelus ambulans	Stål, 1862	UCR_ENT 00014433	Reduviidae	Zelus	ambulans	COSTA RICA	Guanacaste		Estacion Cacao, SW side Volcan Cacao	10.9233	-85.472	1989-11-01 to 1989-12-01	R. Blanco, C. Chavez	Adult Male	INBIO	G. Zhang	2012			Google Earth	1000 m	INBIOCRI000144350
Other material	Zelus ambulans	Stål, 1862	UCR_ENT 00014441	Reduviidae	Zelus	ambulans	COSTA RICA	Guanacaste		Finca Jenny, 30 km N of Liberia	10.8484	-85.5867	1993-08-14 to 1993-08-21	E. Araya	Adult Female	INBIO	G. Zhang	2012			Google Earth	240 m	INBIOCRI001710718
Other material	Zelus ambulans	Stål, 1862	UCR_ENT 00014439	Reduviidae	Zelus	ambulans	COSTA RICA	Puntarenas		Lindora, Res. Biol. Monteverde			1990-11-01	M. Ramirez	Adult Female	INBIO	G. Zhang	2012				1300 m	INBIOCRI000452941
Other material	Zelus ambulans	Stål, 1862	UCR_ENT 00014440	Reduviidae	Zelus	ambulans	COSTA RICA	Puntarenas		Estacion Biol. Las Alturas, Coto Brus	8.94809	-82.8345	1991-04-01	Aguilar, DeVries, and Zumbado	Adult Female	INBIO	G. Zhang	2012			Label	1500 m	INBIOCRI000593169
Other material	Zelus ambulans	Stål, 1862	UCR_ENT 00014442	Reduviidae	Zelus	ambulans	COSTA RICA	Puntarenas		Estacion Biol. Las Alturas, Coto Brus	8.94809	-82.8345	1992-08-01	M. Ramirez & E. Sancho	Adult Female	INBIO	G. Zhang	2012			Label	1500 m	INBIOCRI000874970
Other material	Zelus ambulans	Stål, 1862	UCR_ENT 00014443	Reduviidae	Zelus	ambulans	COSTA RICA	Puntarenas		Fca. Cafrosa, Estacion Las Mellizas, P. N. Amistad	8.89141	-82.7648	1989-10-01	M. Ramirez & G. Mora	Adult Female	INBIO	G. Zhang	2012			Label	1300 m	INBIOCRI000309133
Other material	Zelus ambulans	Stål, 1862	UCR_ENT 00026051	Reduviidae	Zelus	ambulans	COSTA RICA	Puntarenas		12 mi S San Vito de Java	8.69633	-82.9377	1969-08-16	D. H. Janzen	Adult Male	USNM	G. Zhang	2012	Drake Collection	Sweep Netting	Google Earth
Other material	Zelus ambulans	Stål, 1862	UCR_ENT 00031107	Reduviidae	Zelus	ambulans	COSTA RICA	San Jose		San Jose	9.9333	-84.0833	no date provided	J.F. Tristan	Adult Female	USNM	G. Zhang	2012			Gazetteer
Other material	Zelus ambulans	Stål, 1862	UCR_ENT 00048009	Reduviidae	Zelus	ambulans	COSTA RICA	Unknown		Costa Rica			1904-08-01	P. Biolley	Adult Female	CAS	G. Zhang	2012
Other material	Zelus ambulans	Stål, 1862	UCR_ENT 00039909	Reduviidae	Zelus	ambulans	EL SALVADOR	San Salvador		Calle Gerardo Barries	13.6991	-89.215	1905-05-06	G.R. Siliezar	Adult Female	TAMU	G. Zhang	2012
Other material	Zelus ambulans	Stål, 1862	UCR_ENT 00023697	Reduviidae	Zelus	ambulans	GUATEMALA	Alta Verapaz		Panzos	15.4	-89.6667	no date provided	Unknown	Adult Female	RMNH	G. Zhang	2012			Gazetteer
Other material	Zelus ambulans	Stål, 1862	UCR_ENT 00031102	Reduviidae	Zelus	ambulans	GUATEMALA	Chimaltenango		Mun. Yepocapa	14.5042	-90.9569	1948-05-01	H. T. Dalmat	Adult Male	USNM	G. Zhang	2012			Gazetteer
Other material	Zelus ambulans	Stål, 1862	UCR_ENT 00031105	Reduviidae	Zelus	ambulans	GUATEMALA	Chimaltenango		Mun. Yepocapa	14.5042	-90.9569	1948-05-01	H. T. Dalmat	Adult Male	USNM	G. Zhang	2012			Gazetteer
Other material	Zelus ambulans	Stål, 1862	UCR_ENT 00031106	Reduviidae	Zelus	ambulans	GUATEMALA	Chimaltenango		Acatenango	14.5519	-90.9422	1948-08-01	H. T. Dalmat	Adult Male	USNM	G. Zhang	2012			Gazetteer
Other material	Zelus ambulans	Stål, 1862	UCR_ENT 00031109	Reduviidae	Zelus	ambulans	GUATEMALA	Chimaltenango		Mun. Yepocapa	14.5042	-90.9569	1948-05-01	H. T. Dalmat	Adult Female	USNM	G. Zhang	2012			Gazetteer
Other material	Zelus ambulans	Stål, 1862	UCR_ENT 00031112	Reduviidae	Zelus	ambulans	GUATEMALA	Chimaltenango		Mun. Yepocapa	14.5042	-90.9569	1948-05-01	H. T. Dalmat	Adult Female	USNM	G. Zhang	2012			Gazetteer
Other material	Zelus ambulans	Stål, 1862	UCR_ENT 00031114	Reduviidae	Zelus	ambulans	GUATEMALA	Chimaltenango		Mun. Yepocapa	14.5042	-90.9569	1948-05-01	H. T. Dalmat	Adult Female	USNM	G. Zhang	2012			Gazetteer
Other material	Zelus ambulans	Stål, 1862	UCR_ENT 00031110	Reduviidae	Zelus	ambulans	GUATEMALA	Escuintla		El Naranjo, Chic.	14.0833	-90.8152	1944-05-11 to 1944-05-12	E. J. Hambleton	Adult Female	USNM	G. Zhang	2012			Google Earth	36 m
Other material	Zelus ambulans	Stål, 1862	UCR_ENT 00069997	Reduviidae	Zelus	ambulans	GUATEMALA	Escuintla		6.3 mi NE Escuintla	14.2549	-90.9157	1966-07-30	University of Kansas Mexico Expedition	Adult Male	KU	G. Zhang	2012			Google Earth
Other material	Zelus ambulans	Stål, 1862	UCR_ENT 00069998	Reduviidae	Zelus	ambulans	GUATEMALA	Escuintla		6.3 mi NE Escuintla	14.2549	-90.9157	1966-08-03	University of Kansas Mexico Expedition	Adult Male	KU	G. Zhang	2012			Google Earth
Other material	Zelus ambulans	Stål, 1862	UCR_ENT 00042948	Reduviidae	Zelus	ambulans	GUATEMALA	Guatemala		Tacaton, Lago Amatitlan Near Villa Canales	14.4333	-90.5667	1989-01-10	B. Kondratieff	Adult Female	CSUC	G. Zhang	2012			Gazetteer
Other material	Zelus ambulans	Stål, 1862	UCR_ENT 00023695	Reduviidae	Zelus	ambulans	GUATEMALA	Quezaltenango		El Naranjo	14.6639	-92.0864	1925-07-01	E. le Moult	Adult Female	RMNH	G. Zhang	2012			Gazetteer	850 m
Other material	Zelus ambulans	Stål, 1862	UCR_ENT 00023696	Reduviidae	Zelus	ambulans	GUATEMALA	Quezaltenango		El Naranjo	14.6639	-92.0864	1925-07-01	E. le Moult	Adult Female	RMNH	G. Zhang	2012			Gazetteer	850 m
Other material	Zelus ambulans	Stål, 1862	UCR_ENT 00046777	Reduviidae	Zelus	ambulans	GUATEMALA	Sacatepequez		Antigua	14.5611	-90.7344	1930-07-01	D. M. Bates	Adult sex unknown	AMNH	G. Zhang	2012			Gazetteer	1583 m
Other material	Zelus ambulans	Stål, 1862	UCR_ENT 00042949	Reduviidae	Zelus	ambulans	GUATEMALA	Sololß		Panajachel	14.5357	-91.5034	1989-01-16	B. Kondratieff	Adult Female	CSUC	G. Zhang	2012			Google Earth
Other material	Zelus ambulans	Stål, 1862	UCR_ENT 00047957	Reduviidae	Zelus	ambulans	GUATEMALA	Sololß		Panajachel	14.5357	-91.5034	1963-08-19	D. Q. Cavagnaro & M. E. Irwin	Adult Female	CAS	G. Zhang	2012			Google Earth
Other material	Zelus ambulans	Stål, 1862	UCR_ENT 00046776	Reduviidae	Zelus	ambulans	GUATEMALA	Unknown		unknown			no date provided	Unknown	Adult Male	AMNH	G. Zhang	2012
Other material	Zelus ambulans	Stål, 1862	UCR_ENT 00068845	Reduviidae	Zelus	ambulans	HONDURAS	Francisco Morazan		Cedros	14.5833	-87.25	1976-11-25	Unknown	Adult Male	UMSP	G. Zhang	2012			Gazetteer
Other material	Zelus ambulans	Stål, 1862	UCR_ENT 00068846	Reduviidae	Zelus	ambulans	HONDURAS	Francisco Morazan		Cedros	14.5833	-87.25	1976-11-11	Unknown	Adult Female	UMSP	G. Zhang	2012			Gazetteer
Other material	Zelus ambulans	Stål, 1862	UCR_ENT 00068847	Reduviidae	Zelus	ambulans	HONDURAS	Francisco Morazan		Cedros	14.5833	-87.25	1976-10-28	Unknown	Adult Female	UMSP	G. Zhang	2012			Gazetteer
Other material	Zelus ambulans	Stål, 1862	UCR_ENT 00068848	Reduviidae	Zelus	ambulans	HONDURAS	Francisco Morazan		Cedros	14.5833	-87.25	1976-11-25	Unknown	Adult Female	UMSP	G. Zhang	2012			Gazetteer
Other material	Zelus ambulans	Stål, 1862	UCR_ENT 00068849	Reduviidae	Zelus	ambulans	HONDURAS	Francisco Morazan		Cedros	14.5833	-87.25	1976-11-25	Unknown	Adult Female	UMSP	G. Zhang	2012			Gazetteer
Other material	Zelus ambulans	Stål, 1862	UCR_ENT 00068850	Reduviidae	Zelus	ambulans	HONDURAS	Francisco Morazan		Cedros	14.5833	-87.25	1976-11-25	Unknown	Adult Female	UMSP	G. Zhang	2012			Gazetteer
Other material	Zelus ambulans	Stål, 1862	UCR_ENT 00068851	Reduviidae	Zelus	ambulans	HONDURAS	Francisco Morazan		Cedros	14.5833	-87.25	1976-11-07	Unknown	Adult Female	UMSP	G. Zhang	2012			Gazetteer
Other material	Zelus ambulans	Stål, 1862	UCR_ENT 00068852	Reduviidae	Zelus	ambulans	HONDURAS	Francisco Morazan		Cedros	14.5833	-87.25	1976-11-07	Unknown	Adult Female	UMSP	G. Zhang	2012			Gazetteer
Other material	Zelus ambulans	Stål, 1862	UCR_ENT 00068853	Reduviidae	Zelus	ambulans	HONDURAS	Francisco Morazan		Cedros	14.5833	-87.25	1976-11-24	E. A. White	Adult Female	UMSP	G. Zhang	2012			Gazetteer
Other material	Zelus ambulans	Stål, 1862	UCR_ENT 00031108	Reduviidae	Zelus	ambulans	HONDURAS	unknown		Honduras			1918-06-29	F. J. Dyer	Adult Female	USNM	G. Zhang	2012
Other material	Zelus ambulans	Stål, 1862	UCR_ENT 00040454	Reduviidae	Zelus	ambulans	HONDURAS	Yoro		El Progresso	15.4	-87.8	1923-03-22	T. H. Hubbell	Adult Female	TAMU	G. Zhang	2012			Gazetteer
Other material	Zelus ambulans	Stål, 1862	UCR_ENT 00031099	Reduviidae	Zelus	ambulans	MEXICO	Chiapas		unknown			1905-04-03	L. Hotzen	Adult Male	USNM	G. Zhang	2012
Other material	Zelus ambulans	Stål, 1862	UCR_ENT 00031100	Reduviidae	Zelus	ambulans	MEXICO	Chiapas		unknown			1905-04-03	L. Hotzen	Adult Male	USNM	G. Zhang	2012
Other material	Zelus ambulans	Stål, 1862	UCR_ENT 00031101	Reduviidae	Zelus	ambulans	MEXICO	Chiapas		unknown			1905-04-03	L. Hotzen	Adult Male	USNM	G. Zhang	2012
Other material	Zelus ambulans	Stål, 1862	UCR_ENT 00031119	Reduviidae	Zelus	ambulans	MEXICO	Chiapas		Chiapas	16.5	-91.75	no date provided	L. Hotzen	Adult Female	USNM	G. Zhang	2012			Gazetteer
Other material	Zelus ambulans	Stål, 1862	UCR_ENT 00034201	Reduviidae	Zelus	ambulans	MEXICO	Chiapas		Las Rosas	16.4	-92.3833	1953-03-12	R. C. Bechtel and E. I. Schlinger	Adult Male	UCB	G. Zhang	2012			Gazetteer
Other material	Zelus ambulans	Stål, 1862	UCR_ENT 00034202	Reduviidae	Zelus	ambulans	MEXICO	Chiapas		4 mi SW Simojovel	17.0978	-92.7517	1953-03-18	R. C. Bechtel and E. I. Schlinger	Adult Male	UCB	G. Zhang	2012			Google Earth
Other material	Zelus ambulans	Stål, 1862	UCR_ENT 00034203	Reduviidae	Zelus	ambulans	MEXICO	Chiapas		4 mi SW Simojovel	17.0978	-92.7517	1953-03-18	R. C. Bechtel and E. I. Schlinger	Adult Female	UCB	G. Zhang	2012			Google Earth
Other material	Zelus ambulans	Stål, 1862	UCR_ENT 00034204	Reduviidae	Zelus	ambulans	MEXICO	Chiapas		4 mi NW Ocosingo	16.9474	-92.1368	1953-03-08	R. C. Bechtel and E. I. Schlinger	Adult Female	UCB	G. Zhang	2012			Google Earth
Other material	Zelus ambulans	Stål, 1862	UCR_ENT 00034261	Reduviidae	Zelus	ambulans	MEXICO	Chiapas		Reserva El Ocote	16.995	-93.6406	12/2/1993 1993-12-02 to 1993-12-10	G. Ortega, E. Barrera, A. Casasola	Adult Female	IBUNAM	G. Zhang	2012			Google Earth
Other material	Zelus ambulans	Stål, 1862	UCR_ENT 00038413	Reduviidae	Zelus	ambulans	MEXICO	Chiapas		Sanches Ranch, Las Rosas	16.4	-92.3833	1953-03-12	R. F. Smith and E. I. Schlinger	Adult Female	UCB	G. Zhang	2012		Sweep Netting
Other material	Zelus ambulans	Stål, 1862	UCR_ENT 00039906	Reduviidae	Zelus	ambulans	MEXICO	Chiapas		31 km E La Trinitaria, L. Monte Bella Road	16.1113	-91.7906	1967-08-14	H. R. Burke and J. Hafernik	Adult Male	TAMU	G. Zhang	2012			Gazetteer	1463 m
Other material	Zelus ambulans	Stål, 1862	UCR_ENT 00039907	Reduviidae	Zelus	ambulans	MEXICO	Chiapas		Laguna Montebello, Parq. Nac.	16.0997	-91.6808	1984-03-20	S. J. Hanselmann	Adult Female	TAMU	G. Zhang	2012
Other material	Zelus ambulans	Stål, 1862	UCR_ENT 00039911	Reduviidae	Zelus	ambulans	MEXICO	Chiapas		35 km E La Trinitaria, L. Monte Bella Road	16.1004	-91.7536	1967-08-14	H. R. Burke and J. Hafernik	Adult Female	TAMU	G. Zhang	2012			Google Earth	1463 m
Other material	Zelus ambulans	Stål, 1862	UCR_ENT 00039912	Reduviidae	Zelus	ambulans	MEXICO	Chiapas		35 km E La Trinitaria, L. Monte Bella Road	16.1004	-91.7536	1967-08-14	H. R. Burke and J. Hafernik	Adult Female	TAMU	G. Zhang	2012			Google Earth	1463 m
Other material	Zelus ambulans	Stål, 1862	UCR_ENT 00039913	Reduviidae	Zelus	ambulans	MEXICO	Chiapas		Cacahuatan, Las Nubes	14.9928	-92.1664	1980-09-06	H. R. Burke	Adult Female	TAMU	G. Zhang	2012			Gazetteer	1768 m
Other material	Zelus ambulans	Stål, 1862	UCR_ENT 00039914	Reduviidae	Zelus	ambulans	MEXICO	Chiapas		7 mi. S Ixtapa	16.7569	-92.9359	1966-06-16	J. Meyer	Adult Female	TAMU	G. Zhang	2012			Google Earth
Other material	Zelus ambulans	Stål, 1862	UCR_ENT 00039915	Reduviidae	Zelus	ambulans	MEXICO	Chiapas		13 mi NW Ocozocoautla	16.8881	-93.504	1965-06-24	Burke, Meyer, Schaffner	Adult Female	TAMU	G. Zhang	2012			Google Earth	975 m
Other material	Zelus ambulans	Stål, 1862	UCR_ENT 00037149	Reduviidae	Zelus	ambulans	MEXICO	Chihuahua		10 Km. N of Bochil	17.0124	-92.9501	1985-09-29	G.Ekis	Adult Female	UCD	G. Zhang	2012			Google Earth
Other material	Zelus ambulans	Stål, 1862	UCR_ENT 00034259	Reduviidae	Zelus	ambulans	MEXICO	Guerrero		km 24 carr. Taxco-Iguala 3 km. poniente de Mexcaltepec	17.1043	-98.8863	8/30/2001 2001-08-30 to 2001-08-31	H. Brailovsky and E. Barrera	Adult Male	IBUNAM	G. Zhang	2012			Google Earth	1250 m
Other material	Zelus ambulans	Stål, 1862	UCR_ENT 00040452	Reduviidae	Zelus	ambulans	MEXICO	Jalisco		Vulkan Colima	19.5167	-103.633	1918-04-11	J. Laue	Adult Female	TAMU	G. Zhang	2012
Other material	Zelus ambulans	Stål, 1862	UCR_ENT 00040453	Reduviidae	Zelus	ambulans	MEXICO	Jalisco		Vulkan Colima	19.5167	-103.633	1918-12-20	J. Laue	Adult Female	TAMU	G. Zhang	2012
Other material	Zelus ambulans	Stål, 1862	UCR_ENT 00009524	Reduviidae	Zelus	ambulans	MEXICO	Oaxaca		Temascal	18.2388	-96.4003	1965-06-25	A. B. Lau	Adult Female	USNM	G. Zhang	2012	Drake Collection
Other material	Zelus ambulans	Stål, 1862	UCR_ENT 00034257	Reduviidae	Zelus	ambulans	MEXICO	Oaxaca		Portillo del Rayo	15.9333	-96.3833	1987-05-30	L. Cervantes	Adult Male	IBUNAM	G. Zhang	2012			GeoLocate Software
Other material	Zelus ambulans	Stål, 1862	UCR_ENT 00034258	Reduviidae	Zelus	ambulans	MEXICO	Oaxaca		Portillo del Rayo			1985-06-01	E. Barrera	Adult Male	IBUNAM	G. Zhang	2012				1300 m
Other material	Zelus ambulans	Stål, 1862	UCR_ENT 00034251	Reduviidae	Zelus	ambulans	MEXICO	Puebla		3 km Carr. Entironque Xicotepec, Barranca de Patla	20.2314	-97.9501	1994-07-12	E. Barrera and C. Mayorga	Adult Male	IBUNAM	G. Zhang	2012			Label	1341 m
Other material	Zelus ambulans	Stål, 1862	UCR_ENT 00038347	Reduviidae	Zelus	ambulans	MEXICO	Tamaulipas		Gomez Farias, 20 km Joya de Manantiales-Ocampo			2001-09-19	A. Sanchez, I. Pacheco, L. Cervantes	Adult Male	IEXA	G. Zhang	2012	Additional Labels Colecta Nocturna
Other material	Zelus ambulans	Stål, 1862	UCR_ENT 00038348	Reduviidae	Zelus	ambulans	MEXICO	Tamaulipas		Gomez Farias, 5 km a Altacima			2001-09-16	A. Sanchez, I. Pacheco, L. Cervantes	Adult Male	IEXA	G. Zhang	2012	Additional Labels Colecta Nocturna
Other material	Zelus ambulans	Stål, 1862	UCR_ENT 00039910	Reduviidae	Zelus	ambulans	MEXICO	Tamaulipas		6 mi W. Gomez Farias	23.0908	-99.0921	7/6/1986 1986-07-06 to 1986-07-07	J. C. Schaffner	Adult Female	TAMU	G. Zhang	2012			Google Earth	135 m
Other material	Zelus ambulans	Stål, 1862	UCR_ENT 00001097	Reduviidae	Zelus	ambulans	MEXICO	Veracruz		Vera Cruz	19.1727	-96.1333	1982-10-30	G. Gordh	Adult Male	UCR	G. Zhang	2012			Google Earth
Other material	Zelus ambulans	Stål, 1862	UCR_ENT 00009286	Reduviidae	Zelus	ambulans	MEXICO	Veracruz		Jalapa, Wooded Residential Development	19.5183	-96.9033	2003-11-17	T.J. Henry & E. Barrera	Adult Male	USNM	G. Zhang	2012			Label	1400 m
Other material	Zelus ambulans	Stål, 1862	UCR_ENT 00009287	Reduviidae	Zelus	ambulans	MEXICO	Veracruz		Jalapa, Wooded Residential Development	19.5183	-96.9033	2003-11-17	T.J. Henry & E. Barrera	Adult Male	USNM	G. Zhang	2012			Label	1400 m
Other material	Zelus ambulans	Stål, 1862	UCR_ENT 00009523	Reduviidae	Zelus	ambulans	MEXICO	Veracruz		Cordoba	18.9	-96.9333	1966-06-07	Flint & Ortiz	Adult Male	USNM	G. Zhang	2012	Drake Collection		GeoLocate Software
Other material	Zelus ambulans	Stål, 1862	UCR_ENT 00015111	Reduviidae	Zelus	ambulans	MEXICO	Veracruz		Fortin de las Flores	18.9	-97	1963-12-25	C. W. O'Brien	Adult Male	AMNH	G. Zhang	2012
Other material	Zelus ambulans	Stål, 1862	UCR_ENT 00021680	Reduviidae	Zelus	ambulans	MEXICO	Veracruz		Tezonapa	18.6157	-96.6924	1941-08-01	H. Dybas	Adult Male	FMNH	G. Zhang	2012			Google Earth
Other material	Zelus ambulans	Stål, 1862	UCR_ENT 00021681	Reduviidae	Zelus	ambulans	MEXICO	Veracruz		El Fortin	18.9	-97	1941-08-12	H. Dybas	Adult Female	FMNH	G. Zhang	2012			Google Earth	914 m
Other material	Zelus ambulans	Stål, 1862	UCR_ENT 00023694	Reduviidae	Zelus	ambulans	MEXICO	Veracruz		Jalapa	19.5438	-96.9099	no date provided	Unknown	Adult Female	RMNH	G. Zhang	2012			Google Earth
Other material	Zelus ambulans	Stål, 1862	UCR_ENT 00031094	Reduviidae	Zelus	ambulans	MEXICO	Veracruz		Fortin de las Flores	18.9	-97	1963-06-26 to 1963-06-30	D. R. Whitehead	Adult Male	USNM	G. Zhang	2012			Gazetteer	1010 m
Other material	Zelus ambulans	Stål, 1862	UCR_ENT 00031095	Reduviidae	Zelus	ambulans	MEXICO	Veracruz		Cordoba	18.9	-96.9333	1908-07-01	Unknown	Adult Male	USNM	G. Zhang	2012			Gazetteer
Other material	Zelus ambulans	Stål, 1862	UCR_ENT 00031096	Reduviidae	Zelus	ambulans	MEXICO	Veracruz		Cordoba	18.9	-96.9333	14 Jun 1700	Fredk. Knab	Adult Male	USNM	G. Zhang	2012			Gazetteer
Other material	Zelus ambulans	Stål, 1862	UCR_ENT 00031097	Reduviidae	Zelus	ambulans	MEXICO	Veracruz		Cordoba	18.9	-96.9333	1900-04-07	Fredk. Knab	Adult Male	USNM	G. Zhang	2012			GeoLocate Software
Other material	Zelus ambulans	Stål, 1862	UCR_ENT 00031113	Reduviidae	Zelus	ambulans	MEXICO	Veracruz		Cordoba	18.9	-96.9333	2015-12-06	Fredk. Knab	Adult Female	USNM	G. Zhang	2012			GeoLocate Software
Other material	Zelus ambulans	Stål, 1862	UCR_ENT 00031117	Reduviidae	Zelus	ambulans	MEXICO	Veracruz		Fortin de las Flores	18.9	-97	1963-06-26 to 1963-06-30	D. R. Whitehead	Adult Female	USNM	G. Zhang	2012			Gazetteer	1010 m
Other material	Zelus ambulans	Stål, 1862	UCR_ENT 00031118	Reduviidae	Zelus	ambulans	MEXICO	Veracruz		Orizaba	18.85	-97.1	1945-01-01	N. L. H. Krauss	Adult Female	USNM	G. Zhang	2012			Google Earth
Other material	Zelus ambulans	Stål, 1862	UCR_ENT 00031120	Reduviidae	Zelus	ambulans	MEXICO	Veracruz		Cordoba	18.9	-96.9333	1908-05-07	Fredk. Knab	Adult Female	USNM	G. Zhang	2012			Gazetteer
Other material	Zelus ambulans	Stål, 1862	UCR_ENT 00034199	Reduviidae	Zelus	ambulans	MEXICO	Veracruz		2 mi SE Jalapa	19.5256	-96.8882	1962-08-05	J. K. Drew and R. F. Smith	Adult Male	UCB	G. Zhang	2012			Google Earth
Other material	Zelus ambulans	Stål, 1862	UCR_ENT 00034200	Reduviidae	Zelus	ambulans	MEXICO	Veracruz		Lake Catemaco, 5 mi S	18.296	-95.0699	1961-07-06	D. H. Janzen	Adult Male	UCB	G. Zhang	2012			Google Earth
Other material	Zelus ambulans	Stål, 1862	UCR_ENT 00034205	Reduviidae	Zelus	ambulans	MEXICO	Veracruz		Jalapa	19.5333	-96.9167	1981-07-19	C. Gold	Adult Male	UCB	G. Zhang	2012			GeoLocate Software
Other material	Zelus ambulans	Stål, 1862	UCR_ENT 00034206	Reduviidae	Zelus	ambulans	MEXICO	Veracruz		Monte Blanco	18.9667	-97.0167	1987-08-12	J. Doyen	Adult Male	UCB	G. Zhang	2012			Gazetteer
Other material	Zelus ambulans	Stål, 1862	UCR_ENT 00034207	Reduviidae	Zelus	ambulans	MEXICO	Veracruz		Rio Metlec, Fortin de las Flores	19.2117	-96.202	1977-09-19	J. Chemsak & A. & M. Michelbacher	Adult Female	UCB	G. Zhang	2012			Google Earth
Other material	Zelus ambulans	Stål, 1862	UCR_ENT 00034252	Reduviidae	Zelus	ambulans	MEXICO	Veracruz		Barranca de Metlac			08 Mar 1883	A. Ibarra	Adult Male	IBUNAM	G. Zhang	2012
Other material	Zelus ambulans	Stål, 1862	UCR_ENT 00034253	Reduviidae	Zelus	ambulans	MEXICO	Veracruz		Ixtaczoquitlan	18.85	-97.07	2000-04-13	H. Brailovsky, E. Barrera	Adult Male	IBUNAM	G. Zhang	2012			Gazetteer
Other material	Zelus ambulans	Stål, 1862	UCR_ENT 00034254	Reduviidae	Zelus	ambulans	MEXICO	Veracruz		Municipo Tlilapan Arroyo Quetzalan Los Manantiales	18.795	-97.1022	2000-12-04	H. Brailovsky and E. Barrera	Adult Male	IBUNAM	G. Zhang	2012				1160 m
Other material	Zelus ambulans	Stål, 1862	UCR_ENT 00034255	Reduviidae	Zelus	ambulans	MEXICO	Veracruz		Municipo Tlilapan Arroyo Quetzalan Los Manantiales	18.795	-97.1022	2000-12-04	H. Brailovsky and E. Barrera	Adult Male	IBUNAM	G. Zhang	2012				1160 m
Other material	Zelus ambulans	Stål, 1862	UCR_ENT 00034256	Reduviidae	Zelus	ambulans	MEXICO	Veracruz		Tlilapan 5 km carr. Orizaba - Zongolica	18.3507	-95.3259	2000-05-02	E. Barrera & A. Ibarra	Adult Male	IBUNAM	G. Zhang	2012			Gazetteer
Other material	Zelus ambulans	Stål, 1862	UCR_ENT 00034260	Reduviidae	Zelus	ambulans	MEXICO	Veracruz		Municipo Tlilapan Arroyo Quetzalan Los Manantiales	18.795	-97.1022	2000-12-04	H. Brailovsky and E. Barrera	Adult Female	IBUNAM	G. Zhang	2012				1160 m
Other material	Zelus ambulans	Stål, 1862	UCR_ENT 00034262	Reduviidae	Zelus	ambulans	MEXICO	Veracruz		Tlilapan 5 km carr. Orizaba - Zongolica	18.3507	-95.3259	2000-05-02	E. Barrera & A. Ibarra	Adult Female	IBUNAM	G. Zhang	2012			Gazetteer
Other material	Zelus ambulans	Stål, 1862	UCR_ENT 00034263	Reduviidae	Zelus	ambulans	MEXICO	Veracruz		Jalapa	19.5333	-96.9167	1985-09-16	J. Pena	Adult Female	IBUNAM	G. Zhang	2012			GeoLocate Software
Other material	Zelus ambulans	Stål, 1862	UCR_ENT 00036022	Reduviidae	Zelus	ambulans	MEXICO	Veracruz		Orizaba Ixtaczoquitlan			2000-05-04	E. Barrera & A. Ibarra	Adult Male	IBUNAM	G. Zhang	2012				90 m
Other material	Zelus ambulans	Stål, 1862	UCR_ENT 00036023	Reduviidae	Zelus	ambulans	MEXICO	Veracruz		Iztaczoquitlan			2000-07-25	E. Barrera & A. Ibarra	Adult Male	IBUNAM	G. Zhang	2012				900 m
Other material	Zelus ambulans	Stål, 1862	UCR_ENT 00037116	Reduviidae	Zelus	ambulans	MEXICO	Veracruz		Cordoba	18.9	-96.9333	1966-07-13	A. B. Lau	Adult Male	UCD	G. Zhang	2012			GeoLocate Software
Other material	Zelus ambulans	Stål, 1862	UCR_ENT 00037117	Reduviidae	Zelus	ambulans	MEXICO	Veracruz		Cordoba	18.9	-96.9333	1966-07-06	J. S. Buckett, M. R. and R. C. Gardner	Adult Male	UCD	G. Zhang	2012			GeoLocate Software
Other material	Zelus ambulans	Stål, 1862	UCR_ENT 00037146	Reduviidae	Zelus	ambulans	MEXICO	Veracruz		Cordoba	18.9	-96.9333	1966-06-29	J. S. Buckett, M. R. and R. C. Gardner	Adult Female	UCD	G. Zhang	2012			GeoLocate Software
Other material	Zelus ambulans	Stål, 1862	UCR_ENT 00037147	Reduviidae	Zelus	ambulans	MEXICO	Veracruz		Cordoba	18.9	-96.9333	1966-06-29	J. S. Buckett, M. R. and R. C. Gardner	Adult Female	UCD	G. Zhang	2012			GeoLocate Software
Other material	Zelus ambulans	Stål, 1862	UCR_ENT 00037148	Reduviidae	Zelus	ambulans	MEXICO	Veracruz		Cordoba	18.9	-96.9333	1966-06-29	J. S. Buckett, M. R. and R. C. Gardner	Adult Female	UCD	G. Zhang	2012			GeoLocate Software
Other material	Zelus ambulans	Stål, 1862	UCR_ENT 00037204	Reduviidae	Zelus	ambulans	MEXICO	Veracruz		Cordoba	18.9	-96.9333	1966-09-21	A. B. Lau	Adult Male	UCD	G. Zhang	2012			GeoLocate Software
Other material	Zelus ambulans	Stål, 1862	UCR_ENT 00037205	Reduviidae	Zelus	ambulans	MEXICO	Veracruz		Cordoba	18.9	-96.9333	1966-07-13	A. B. Lau	Adult Female	UCD	G. Zhang	2012			GeoLocate Software
Other material	Zelus ambulans	Stål, 1862	UCR_ENT 00038412	Reduviidae	Zelus	ambulans	MEXICO	Veracruz		Cordoba	18.9	-96.9333	1941-07-10	C. H. Seevers	Adult Female	UCB	G. Zhang	2012			GeoLocate Software
Other material	Zelus ambulans	Stål, 1862	UCR_ENT 00047956	Reduviidae	Zelus	ambulans	MEXICO	Veracruz		Rio Metlac near El Fortin	18.8326	-96.9812	1948-12-17	H. B. Leech	Adult Male	CAS	G. Zhang	2012			Gazetteer
Other material	Zelus ambulans	Stål, 1862	UCR_ENT 00048006	Reduviidae	Zelus	ambulans	MEXICO	Veracruz		Citlaltepetl	18.9927	-97.1972	1969-06-23	L. W. Swan	Adult Male	CAS	G. Zhang	2012			Google Earth	2800 m
Other material	Zelus ambulans	Stål, 1862	UCR_ENT 00048007	Reduviidae	Zelus	ambulans	NICARAGUA	unknown		Corinto			1930-01-28	T. O. Zachhoke	Adult Female	CAS	G. Zhang	2012
Other material	Zelus ambulans	Stål, 1862	UCR_ENT 00017884	Reduviidae	Zelus	ambulans	PANAMA	Chiriqui		[Dist.] Renacimiento, Oeste Clara	8.87568	-82.7469	1976-07-05	Engleman	Adult Female	AMNH	G. Zhang	2012			Google Earth	1676 m
Other material	Zelus ambulans	Stål, 1862	UCR_ENT 00039908	Reduviidae	Zelus	ambulans	PANAMA	Chiriqui		Callejon Seco, 5 km. W Boquete	8.80065	-82.484	1998-09-09	Gillogly & Stockwell	Adult Female	TAMU	G. Zhang	2012			Gazetteer	1700 m
Other material	Zelus ambulans	Stål, 1862	UCR_ENT 00047955	Reduviidae	Zelus	ambulans	PANAMA	Chiriqui		Barriles	8.8	-82.7	1929-12-24	M.E. McLellan	Adult Male	CAS	G. Zhang	2012			Gazetteer
Other material	Zelus ambulans	Stål, 1862	UCR_ENT 00011883	Reduviidae	Zelus	ambulans	UNKNOWN	unknown		Unknown			1980-09-08	Fernando Pinela	Adult Male	FSCA	G. Zhang	2012
Holotype	Zelus annulosus	(Stål, 1866)	UCR_ENT 00040999	Reduviidae	Zelus	annulosus	UNKNOWN	unknown		Amazon			No date provided	Stevens	Adult Female	NHRS	G. Zhang	2012	Verbatim label info: Amazon / Stevens. / annulosus Stal. / Typus / NHRS-GULI 000000319				NHRS-GULI 000000319
Other material	Zelus annulosus	(Stål, 1866)	UCR_ENT 00009262	Reduviidae	Zelus	annulosus	BRAZIL	Amazonas		Manaos	-3.1133	-60.0253	No date provided	H. B. Merrill	Adult Male	USNM	G. Zhang	2012			Gazetteer
Other material	Zelus annulosus	(Stål, 1866)	UCR_ENT 00009269	Reduviidae	Zelus	annulosus	BRAZIL	Amazonas		Teffe	-3.3667	-64.7	1920-01-28	H. S. Parish	Adult Female	USNM	G. Zhang	2012
Other material	Zelus annulosus	(Stål, 1866)	UCR_ENT 00017766	Reduviidae	Zelus	annulosus	BRAZIL	Amazonas		Manaus	-3.1133	-60.0253	1945-10-01	W. Praetorius	Adult Female	AMNH	G. Zhang	2012			GeoLocate Software
Other material	Zelus annulosus	(Stål, 1866)	UCR_ENT 00071250	Reduviidae	Zelus	annulosus	BRAZIL	Amazonas		Teffe	-3.3667	-64.7	1920-01-28	H. S. Parish	Adult Female	TAMU	G. Zhang	2012
Other material	Zelus annulosus	(Stål, 1866)	UCR_ENT 00038420	Reduviidae	Zelus	annulosus	COLOMBIA	Amazonas		Leticia	-4.2153	-69.9406	1973-08-13 to 1973-08-17	P. A. Rauch	Adult Female	UCB	G. Zhang	2012			Gazetteer
Other material	Zelus annulosus	(Stål, 1866)	UCR_ENT 00004176	Reduviidae	Zelus	annulosus	FRENCH GUIANA	Cayenne	Roura	Kaw Mountains, Amazon Nature Lodge	4.55972	-52.2072	2010-09-13	C. Weirauch, L. Berniker, G. Zhang	Juvenile sex unknown	UCR	G. Zhang	2012	Primary DNA voucher RCW_2098			307 m
Other material	Zelus annulosus	(Stål, 1866)	UCR_ENT 00046743	Reduviidae	Zelus	annulosus	FRENCH GUIANA	Saint-Laurent-du-Maroni	Saül	Les Eaux Claires, 3.5 mi N of Saul	3.6676	-53.2	1996-04-14	C. Chaboo	Adult Male	AMNH	G. Zhang	2012		Hand Collecting	GeoLocate Software
Holotype	Zelus antiguensis	Zhang and Hart, 2016	UCR_ENT 00007995	Reduviidae	Zelus	antiguensis	GUATEMALA	Sacatepequez		Antigua	14.5611	-90.7344	no date provided	B. Lott	Adult Male	USNM	G. Zhang	2013			Gazetteer	1583 m
Paratype	Zelus antiguensis	Zhang and Hart, 2016	UCR_ENT 00007955	Reduviidae	Zelus	antiguensis	GUATEMALA	Sacatepequez		Antigua	14.5611	-90.7344	no date provided	B. Lott	Adult Male	USNM	G. Zhang	2013	Genitallia dissected		Gazetteer	1583 m
Paratype	Zelus antiguensis	Zhang and Hart, 2016	UCR_ENT 00009305	Reduviidae	Zelus	antiguensis	GUATEMALA	Sacatepequez		Antigua	14.5667	-90.7333	1965-10-01	N. L. H. Krauss	Adult Female	USNM	G. Zhang	2013			Gazetteer
Paratype	Zelus antiguensis	Zhang and Hart, 2016	UCR_ENT 00015069	Reduviidae	Zelus	antiguensis	GUATEMALA	Sacatepequez		Antigua	14.5611	-90.7344	1930-07-01	D. M. Bates	Adult Female	AMNH	G. Zhang	2013			Gazetteer	1583 m
Paratype	Zelus antiguensis	Zhang and Hart, 2016	UCR_ENT 00029478	Reduviidae	Zelus	antiguensis	GUATEMALA	Sacatepequez		Antigua	14.5611	-90.7344	1951-09-12	R. H. Painter	Adult Female	USNM	G. Zhang	2013			Gazetteer	1583 m
Paratype	Zelus antiguensis	Zhang and Hart, 2016	UCR_ENT 00017184	Reduviidae	Zelus	antiguensis	MEXICO	Chiapas		Tuxtla Gutierrez	16.7547	-93.1149	1955-07-06 to 1955-07-10	P. & C. Vaurie	Adult Female	AMNH	G. Zhang	2013				549 m
Paratype	Zelus antiguensis	Zhang and Hart, 2016	UCR_ENT 00006071	Reduviidae	Zelus	antiguensis	MEXICO	Jalisco		Pine Forst 87 miles S of Manzamitla	19.1732	-103.661	1948-12-01	H. B. Leech	Adult Female	CAS	G. Zhang	2013			Google Earth
Paratype	Zelus antiguensis	Zhang and Hart, 2016	UCR_ENT 00019699	Reduviidae	Zelus	antiguensis	MEXICO	Jalisco		Pine Forst 87 miles S of Manzamitla	19.1732	-103.661	1948-12-01	E. S. Ross	Adult Female	CAS	G. Zhang	2013			Google Earth
Paratype	Zelus antiguensis	Zhang and Hart, 2016	UCR_ENT 00038423	Reduviidae	Zelus	antiguensis	MEXICO	Jalisco		6 mi W of Chapala	20.2971	-103.281	1963-06-30	J. Doyen	Adult Female	UCB	G. Zhang	2013			Google Earth
Paratype	Zelus antiguensis	Zhang and Hart, 2016	UCR_ENT 00023699	Reduviidae	Zelus	antiguensis	MEXICO	Veracruz		Jalapa	19.5438	-96.9099	no date provided	Unknown	Adult Female	RMNH	G. Zhang	2013			Google Earth
Neotype	Zelus armillatus	(Lepeletier & Serville, 1825)	UCR_ENT 00008021	Reduviidae	Zelus	armillatus	BRAZIL	Santa Catarina		Nova Teutonia	-27.1833	-52.3833	1951-03-21	F. Plaumann	Adult sex unknown	USNM	G. Zhang	2012	JC Lutz Collection 1961
Other material	Zelus armillatus	(Lepeletier & Serville, 1825)	UCR_ENT 00001098	Reduviidae	Zelus	armillatus	VENEZUELA	Aragua		35 km west of Maracay	10.468	-67.1925	1979-06-27	G. Gordh	Adult Male	UCR	G. Zhang	2012	Genitalia dissected		Google Earth	1675 m
Other material	Zelus armillatus	(Lepeletier & Serville, 1825)	UCR_ENT 00001146	Reduviidae	Zelus	armillatus	VENEZUELA	Aragua		35 km west of Maracay	10.468	-67.1925	1979-06-27	G. Gordh	Adult Male	UCR	G. Zhang	2012			Google Earth	1675 m
Other material	Zelus armillatus	(Lepeletier & Serville, 1825)	UCR_ENT 00001147	Reduviidae	Zelus	armillatus	VENEZUELA	Aragua		35 km west of Maracay	10.468	-67.1925	1979-06-27	G. Gordh	Adult Female	UCR	G. Zhang	2012			Google Earth	1675 m
Other material	Zelus armillatus	(Lepeletier & Serville, 1825)	UCR_ENT 00001220	Reduviidae	Zelus	armillatus	VENEZUELA	Aragua		35 km west of Maracay	10.468	-67.1925	1979-06-27	G. Gordh	Adult Female	UCR	G. Zhang	2012			Google Earth	1675 m
Other material	Zelus armillatus	(Lepeletier & Serville, 1825)	UCR_ENT 00004996	Reduviidae	Zelus	armillatus	COLOMBIA	Meta		San Martin: Reserva Natural El Caduceo	3.66593	-73.6577	2010-10-21 to 2010-10-23	G. Zhang & J. Avendaño	Adult Male	UCR	G. Zhang	2012	Primary DNA voucher RCW_2163	Sweep Netting	GPS	380 m
Other material	Zelus armillatus	(Lepeletier & Serville, 1825)	UCR_ENT 00010838	Reduviidae	Zelus	armillatus	VENEZUELA	Monagas		60 km SE of Maturin	9.29916	-62.9582	1956-06-22	A. S. Menke	Adult Female	LACM	G. Zhang	2012			Google Earth
Other material	Zelus armillatus	(Lepeletier & Serville, 1825)	UCR_ENT 00015079	Reduviidae	Zelus	armillatus	BOLIVIA	Santa Cruz		Santa Cruz de la Sierra	-17.8	-63.1667	no date provided	Pinckert	Adult Female	AMNH	G. Zhang	2012			Gazetteer
Other material	Zelus armillatus	(Lepeletier & Serville, 1825)	UCR_ENT 00015083	Reduviidae	Zelus	armillatus	PERU	San Martin		Achinamiza	-6.4167	-75.9	1927-10-19	H. Bassler	Adult Female	AMNH	G. Zhang	2012			Gazetteer
Other material	Zelus armillatus	(Lepeletier & Serville, 1825)	UCR_ENT 00015084	Reduviidae	Zelus	armillatus	PERU	San Martin		Achinamiza	-6.4167	-75.9	1926-01-05	H. Bassler	Adult Female	AMNH	G. Zhang	2012			Gazetteer
Other material	Zelus armillatus	(Lepeletier & Serville, 1825)	UCR_ENT 00015086	Reduviidae	Zelus	armillatus	PARAGUAY	Paraguari		Villarrica	-25.75	-56.5	Dec 1700	F. Schade	Adult Female	AMNH	G. Zhang	2012			GeoLocate Software
Other material	Zelus armillatus	(Lepeletier & Serville, 1825)	UCR_ENT 00015087	Reduviidae	Zelus	armillatus	PARAGUAY	Paraguari		Villarrica	-25.75	-56.5	March	F. Schade	Adult Female	AMNH	G. Zhang	2012			GeoLocate Software
Other material	Zelus armillatus	(Lepeletier & Serville, 1825)	UCR_ENT 00015088	Reduviidae	Zelus	armillatus	ECUADOR	unknown		unknown			no date provided	W. von Hagen	Adult Female	AMNH	G. Zhang	2012
Other material	Zelus armillatus	(Lepeletier & Serville, 1825)	UCR_ENT 00015089	Reduviidae	Zelus	armillatus	PERU	Amazonas		Seliho	-6.1833	-78.2667	September	F. Schade	Adult Female	AMNH	G. Zhang	2012			Gazetteer	3086 m
Other material	Zelus armillatus	(Lepeletier & Serville, 1825)	UCR_ENT 00017711	Reduviidae	Zelus	armillatus	COLOMBIA	Amazonas		Leticia	-4.2153	-69.9406	1975-04-02 to 1975-04-07	D. Engleman	Adult Male	AMNH	G. Zhang	2012			Gazetteer
Other material	Zelus armillatus	(Lepeletier & Serville, 1825)	UCR_ENT 00017712	Reduviidae	Zelus	armillatus	BRAZIL	Mato Grosso		Mato Gr.	-10.4167	-59.4667	1977-03-17 to 1977-03-22	D. Engleman	Adult Male	AMNH	G. Zhang	2012			Label
Other material	Zelus armillatus	(Lepeletier & Serville, 1825)	UCR_ENT 00017713	Reduviidae	Zelus	armillatus	ECUADOR	Sucumbios		Limoncocha	-0.43333	-76.6333	1974-03-24 to 1974-03-31	Dodge Engleman	Adult Male	AMNH	G. Zhang	2012			Label	274 m
Other material	Zelus armillatus	(Lepeletier & Serville, 1825)	UCR_ENT 00017714	Reduviidae	Zelus	armillatus	BRAZIL	Parana		Caviuna	-23.2	-51.3667	1945-08-01	A. Maller	Adult Male	AMNH	G. Zhang	2012			GeoLocate Software
Other material	Zelus armillatus	(Lepeletier & Serville, 1825)	UCR_ENT 00017767	Reduviidae	Zelus	armillatus	PERU	Huanuco		Tingo Maria (Town of)	-9.3	-75.9833	1963-03-05 to 1963-03-08	Pena	Adult Male	AMNH	G. Zhang	2012			GeoLocate Software	671 m
Other material	Zelus armillatus	(Lepeletier & Serville, 1825)	UCR_ENT 00017768	Reduviidae	Zelus	armillatus	PERU	Huanuco		Tingo Maria (Town of)	-9.3	-75.9833	1963-03-05 to 1963-03-09	Pena	Adult Male	AMNH	G. Zhang	2012			GeoLocate Software	671 m
Other material	Zelus armillatus	(Lepeletier & Serville, 1825)	UCR_ENT 00017769	Reduviidae	Zelus	armillatus	PERU	San Martin		Achinamiza	-6.4167	-75.9	1927-10-20	H. Bassler	Adult Male	AMNH	G. Zhang	2012			Gazetteer
Other material	Zelus armillatus	(Lepeletier & Serville, 1825)	UCR_ENT 00017770	Reduviidae	Zelus	armillatus	PERU	San Martin		Achinamiza	-6.4167	-75.9	1927-10-20	H. Bassler	Adult Male	AMNH	G. Zhang	2012			Gazetteer
Other material	Zelus armillatus	(Lepeletier & Serville, 1825)	UCR_ENT 00017771	Reduviidae	Zelus	armillatus	PERU	Ucayali		Rio Ucayali	-7.18357	-73.753	1923-10-03	H. Bassler	Adult Male	AMNH	G. Zhang	2012			Google Earth
Other material	Zelus armillatus	(Lepeletier & Serville, 1825)	UCR_ENT 00017772	Reduviidae	Zelus	armillatus	BOLIVIA	Santa Cruz		Sara	-17	-63.583	no date provided	Steinbach	Adult Male	AMNH	G. Zhang	2012			Gazetteer
Other material	Zelus armillatus	(Lepeletier & Serville, 1825)	UCR_ENT 00017773	Reduviidae	Zelus	armillatus	PERU	Junin		Satipo	-11.2667	-74.6833	1945-03-01	P. Paprzycki	Adult Female	AMNH	G. Zhang	2012			Gazetteer
Other material	Zelus armillatus	(Lepeletier & Serville, 1825)	UCR_ENT 00017774	Reduviidae	Zelus	armillatus	PERU	Huanuco		Tingo Maria (Town of)	-9.3	-75.9833	1946-10-14	J. C. Pallister	Adult Female	AMNH	G. Zhang	2012			GeoLocate Software	671 m
Other material	Zelus armillatus	(Lepeletier & Serville, 1825)	UCR_ENT 00017775	Reduviidae	Zelus	armillatus	PERU	unknown		Northeastern Peru			no date provided	H. Bassler	Adult Female	AMNH	G. Zhang	2012
Other material	Zelus armillatus	(Lepeletier & Serville, 1825)	UCR_ENT 00017776	Reduviidae	Zelus	armillatus	PERU	San Martin		Achinamiza	-6.4167	-75.9	1927-10-09	H. Bassler	Adult Female	AMNH	G. Zhang	2012			Gazetteer
Other material	Zelus armillatus	(Lepeletier & Serville, 1825)	UCR_ENT 00017777	Reduviidae	Zelus	armillatus	PERU	Huanuco		Tingo Maria (Town of)	-9.3	-75.9833	1946-10-18	J. C. Pallister	Adult Female	AMNH	G. Zhang	2012			GeoLocate Software	671 m
Other material	Zelus armillatus	(Lepeletier & Serville, 1825)	UCR_ENT 00017778	Reduviidae	Zelus	armillatus	BRAZIL	Amazonas		Benjamin Constant	-4.3744	-70.0297	1942-03-01	August Rabaut	Adult Female	AMNH	G. Zhang	2012			Gazetteer
Other material	Zelus armillatus	(Lepeletier & Serville, 1825)	UCR_ENT 00017779	Reduviidae	Zelus	armillatus	BOLIVIA	La Paz		Coroico	-16.1921	-67.722	1955-12-03 to 1955-12-08	Pena	Adult Female	AMNH	G. Zhang	2012			Google Earth	1800 m
Other material	Zelus armillatus	(Lepeletier & Serville, 1825)	UCR_ENT 00017780	Reduviidae	Zelus	armillatus	PERU	Huanuco		Tingo Maria (Town of)	-9.3	-75.9833	1946-11-23	J. C. Pallister	Adult Female	AMNH	G. Zhang	2012			GeoLocate Software	671 m
Other material	Zelus armillatus	(Lepeletier & Serville, 1825)	UCR_ENT 00017781	Reduviidae	Zelus	armillatus	BRAZIL	Parana		Caviuna	-23.2	-51.3667	1947-08-01	A. Maller	Adult Female	AMNH	G. Zhang	2012			GeoLocate Software
Other material	Zelus armillatus	(Lepeletier & Serville, 1825)	UCR_ENT 00017823	Reduviidae	Zelus	armillatus	BRAZIL	Bahia		Ilheus	-14.7972	-39.0344	1973-03-01	D. Leston	Adult Female	AMNH	G. Zhang	2012			Google Earth
Other material	Zelus armillatus	(Lepeletier & Serville, 1825)	UCR_ENT 00017826	Reduviidae	Zelus	armillatus	BRAZIL	Mato Grosso		Mato Gr.	-10.4167	-59.4667	1977-03-17 to 1977-03-22	D. Engleman	Adult Female	AMNH	G. Zhang	2012			Label
Other material	Zelus armillatus	(Lepeletier & Serville, 1825)	UCR_ENT 00017827	Reduviidae	Zelus	armillatus	BRAZIL	Mato Grosso		Mato Gr.	-10.4167	-59.4667	1977-03-17 to 1977-03-23	D. Engleman	Adult Female	AMNH	G. Zhang	2012			Label
Other material	Zelus armillatus	(Lepeletier & Serville, 1825)	UCR_ENT 00019097	Reduviidae	Zelus	armillatus	PERU	Huanuco		Monzon valley, Tingo Maria	-9.27816	-76.0556	1954-10-26	E. I. Schlinger & E. S. Ross	Adult Male	CAS	G. Zhang	2012			Google Earth
Other material	Zelus armillatus	(Lepeletier & Serville, 1825)	UCR_ENT 00019098	Reduviidae	Zelus	armillatus	PERU	Huanuco		Monzon valley, Tingo Maria	-9.27816	-76.0556	1954-10-19	E. I. Schlinger & E. S. Ross	Adult Male	CAS	G. Zhang	2012			Google Earth
Other material	Zelus armillatus	(Lepeletier & Serville, 1825)	UCR_ENT 00019099	Reduviidae	Zelus	armillatus	PERU	Huanuco		Monzon valley, Tingo Maria	-9.27816	-76.0556	1954-09-23	E. I. Schlinger & E. S. Ross	Adult Male	CAS	G. Zhang	2012			Google Earth
Other material	Zelus armillatus	(Lepeletier & Serville, 1825)	UCR_ENT 00019100	Reduviidae	Zelus	armillatus	PERU	Huanuco		Monzon valley, Tingo Maria	-9.27816	-76.0556	1954-10-12	E. I. Schlinger & E. S. Ross	Adult Male	CAS	G. Zhang	2012			Google Earth
Other material	Zelus armillatus	(Lepeletier & Serville, 1825)	UCR_ENT 00019101	Reduviidae	Zelus	armillatus	PERU	Huanuco		Huanuco	-9.9167	-76.2333	1954-09-16	E. I. Schlinger & E. S. Ross	Adult Male	CAS	G. Zhang	2012			Gazetteer
Other material	Zelus armillatus	(Lepeletier & Serville, 1825)	UCR_ENT 00019102	Reduviidae	Zelus	armillatus	PERU	Huanuco		Monzon valley, Tingo Maria	-9.27816	-76.0556	1954-10-10	E. I. Schlinger & E. S. Ross	Adult Male	CAS	G. Zhang	2012			Google Earth
Other material	Zelus armillatus	(Lepeletier & Serville, 1825)	UCR_ENT 00019103	Reduviidae	Zelus	armillatus	PERU	Huanuco		Monzon valley, Tingo Maria	-9.27816	-76.0556	1954-11-02	E. I. Schlinger & E. S. Ross	Adult Male	CAS	G. Zhang	2012			Google Earth
Other material	Zelus armillatus	(Lepeletier & Serville, 1825)	UCR_ENT 00019104	Reduviidae	Zelus	armillatus	PERU	Huanuco		Monzon valley, Tingo Maria	-9.27816	-76.0556	1954-10-12	E. I. Schlinger & E. S. Ross	Adult Male	CAS	G. Zhang	2012			Google Earth
Other material	Zelus armillatus	(Lepeletier & Serville, 1825)	UCR_ENT 00019105	Reduviidae	Zelus	armillatus	PERU	Huanuco		Monzon valley, Tingo Maria	-9.27816	-76.0556	1954-10-10	E. I. Schlinger & E. S. Ross	Adult Male	CAS	G. Zhang	2012			Google Earth
Other material	Zelus armillatus	(Lepeletier & Serville, 1825)	UCR_ENT 00019111	Reduviidae	Zelus	armillatus	PERU	Huanuco		Monzon valley, Tingo Maria	-9.27816	-76.0556	1954-10-15	E. I. Schlinger & E. S. Ross	Adult Female	CAS	G. Zhang	2012			Google Earth
Other material	Zelus armillatus	(Lepeletier & Serville, 1825)	UCR_ENT 00019112	Reduviidae	Zelus	armillatus	PERU	Huanuco		Monzon valley, Tingo Maria	-9.27816	-76.0556	1954-10-10	E. I. Schlinger & E. S. Ross	Adult Female	CAS	G. Zhang	2012			Google Earth
Other material	Zelus armillatus	(Lepeletier & Serville, 1825)	UCR_ENT 00019113	Reduviidae	Zelus	armillatus	PERU	Huanuco		Monzon valley, Tingo Maria	-9.27816	-76.0556	1954-10-10	E. I. Schlinger & E. S. Ross	Adult Female	CAS	G. Zhang	2012			Google Earth
Other material	Zelus armillatus	(Lepeletier & Serville, 1825)	UCR_ENT 00019114	Reduviidae	Zelus	armillatus	PERU	Huanuco		Monzon valley, Tingo Maria	-9.27816	-76.0556	1954-10-12	E. I. Schlinger & E. S. Ross	Adult Female	CAS	G. Zhang	2012			Google Earth
Other material	Zelus armillatus	(Lepeletier & Serville, 1825)	UCR_ENT 00019115	Reduviidae	Zelus	armillatus	PERU	Huanuco		Monzon valley, Tingo Maria	-9.27816	-76.0556	1954-10-10	E. I. Schlinger & E. S. Ross	Adult Female	CAS	G. Zhang	2012			Google Earth
Other material	Zelus armillatus	(Lepeletier & Serville, 1825)	UCR_ENT 00019116	Reduviidae	Zelus	armillatus	PERU	Huanuco		Huanuco	-9.9167	-76.2333	1954-09-16	E. I. Schlinger & E. S. Ross	Adult Female	CAS	G. Zhang	2012			Gazetteer
Other material	Zelus armillatus	(Lepeletier & Serville, 1825)	UCR_ENT 00019117	Reduviidae	Zelus	armillatus	PERU	Huanuco		Monzon valley, Tingo Maria	-9.27816	-76.0556	1954-11-02	E. I. Schlinger & E. S. Ross	Adult Female	CAS	G. Zhang	2012			Google Earth
Other material	Zelus armillatus	(Lepeletier & Serville, 1825)	UCR_ENT 00019118	Reduviidae	Zelus	armillatus	PERU	Huanuco		Monzon valley, Tingo Maria	-9.27816	-76.0556	1954-10-15	E. I. Schlinger & E. S. Ross	Adult Female	CAS	G. Zhang	2012			Google Earth
Other material	Zelus armillatus	(Lepeletier & Serville, 1825)	UCR_ENT 00019119	Reduviidae	Zelus	armillatus	PERU	Huanuco		Monzon valley, Tingo Maria	-9.27816	-76.0556	1954-11-02	E. I. Schlinger & E. S. Ross	Adult Female	CAS	G. Zhang	2012			Google Earth
Other material	Zelus armillatus	(Lepeletier & Serville, 1825)	UCR_ENT 00019120	Reduviidae	Zelus	armillatus	PERU	Huanuco		Monzon valley, Tingo Maria	-9.27816	-76.0556	1954-10-19	E. I. Schlinger & E. S. Ross	Adult Female	CAS	G. Zhang	2012			Google Earth
Other material	Zelus armillatus	(Lepeletier & Serville, 1825)	UCR_ENT 00019121	Reduviidae	Zelus	armillatus	COLOMBIA	Meta		Villavicencio	4.15333	-73.635	1905-04-01	Unknown	Adult Female	CAS	G. Zhang	2012			Google Earth
Other material	Zelus armillatus	(Lepeletier & Serville, 1825)	UCR_ENT 00022485	Reduviidae	Zelus	armillatus	COLOMBIA	Meta		Acacias	4	-73.7667	no date provided	C.Torres	Adult Female	ICN	G. Zhang	2012			Label	522 m
Other material	Zelus armillatus	(Lepeletier & Serville, 1825)	UCR_ENT 00022486	Reduviidae	Zelus	armillatus	COLOMBIA	Meta		Acacias	4	-73.7667	no date provided	C.Torres	Adult Female	ICN	G. Zhang	2012			Label	522 m
Other material	Zelus armillatus	(Lepeletier & Serville, 1825)	UCR_ENT 00022487	Reduviidae	Zelus	armillatus	COLOMBIA	Putumayo		Caucaya	-0.1803	-74.7742	1949-12-01	Richter	Adult Female	ICN	G. Zhang	2012			Gazetteer
Other material	Zelus armillatus	(Lepeletier & Serville, 1825)	UCR_ENT 00022488	Reduviidae	Zelus	armillatus	COLOMBIA	Cundinamarca		Guayabetal	4.2164	-73.8133	1976-09-11	R.Restrepo	Adult Female	ICN	G. Zhang	2012			Gazetteer
Other material	Zelus armillatus	(Lepeletier & Serville, 1825)	UCR_ENT 00022489	Reduviidae	Zelus	armillatus	COLOMBIA	Cundinamarca		Guayabetal	4.2164	-73.8133	1976-05-15	Myriama Leon	Adult Female	ICN	G. Zhang	2012			Gazetteer
Other material	Zelus armillatus	(Lepeletier & Serville, 1825)	UCR_ENT 00022491	Reduviidae	Zelus	armillatus	UNKNOWN	unknown		Unknown			June	P.Lopez& L.E. Agwirre	Adult Female	ICN	G. Zhang	2012
Other material	Zelus armillatus	(Lepeletier & Serville, 1825)	UCR_ENT 00022492	Reduviidae	Zelus	armillatus	COLOMBIA	Boyacá		Sta. Maria			2000-02-01	Unknown	Adult Male	ICN	G. Zhang	2012
Other material	Zelus armillatus	(Lepeletier & Serville, 1825)	UCR_ENT 00023046	Reduviidae	Zelus	armillatus	COLOMBIA	Antioquia		Santa Rosa de Osos	6.65145	-75.4635	1998-12-01	Alejandro Madrigal	Adult Female	MEFLG	G. Zhang	2012			Google Earth
Other material	Zelus armillatus	(Lepeletier & Serville, 1825)	UCR_ENT 00023051	Reduviidae	Zelus	armillatus	COLOMBIA	Cundinamarca		Quetame	4.3331	-73.8656	1940-08-01	FL Gallego M	Adult Female	MEFLG	G. Zhang	2012			Gazetteer
Other material	Zelus armillatus	(Lepeletier & Serville, 1825)	UCR_ENT 00023052	Reduviidae	Zelus	armillatus	COLOMBIA	Antioquia		Cocorna	6.05	-75.1667	1943-09-01	FL Gallego M	Adult Female	MEFLG	G. Zhang	2012			Google Earth
Other material	Zelus armillatus	(Lepeletier & Serville, 1825)	UCR_ENT 00023663	Reduviidae	Zelus	armillatus	PERU	unknown		Sicuani	-14.2851	-71.2245	no date provided	Unknown	Adult Female	RMNH	G. Zhang	2012			Google Earth
Other material	Zelus armillatus	(Lepeletier & Serville, 1825)	UCR_ENT 00023664	Reduviidae	Zelus	armillatus	BRAZIL	Amazonas		Teffe	-3.3667	-64.7	no date provided	Unknown	Adult Female	RMNH	G. Zhang	2012
Other material	Zelus armillatus	(Lepeletier & Serville, 1825)	UCR_ENT 00023665	Reduviidae	Zelus	armillatus	PERU	unknown		Pachitea	-9.41667	-75.1667	no date provided	Unknown	Adult Female	RMNH	G. Zhang	2012			Gazetteer
Other material	Zelus armillatus	(Lepeletier & Serville, 1825)	UCR_ENT 00023942	Reduviidae	Zelus	armillatus	BRAZIL	Rio de Janeiro		Rio de Janeiro	-22.9	-43.2333	no date provided	Crommelin	Adult Female	RMNH	G. Zhang	2012			Gazetteer
Other material	Zelus armillatus	(Lepeletier & Serville, 1825)	UCR_ENT 00023943	Reduviidae	Zelus	armillatus	BRAZIL	Rio de Janeiro		Rio de Janeiro	-22.9	-43.2333	no date provided	Crommelin	Adult Female	RMNH	G. Zhang	2012			Gazetteer
Other material	Zelus armillatus	(Lepeletier & Serville, 1825)	UCR_ENT 00023944	Reduviidae	Zelus	armillatus	UNKNOWN	unknown		Unknown			no date provided	Unknown	Adult Female	RMNH	G. Zhang	2012
Other material	Zelus armillatus	(Lepeletier & Serville, 1825)	UCR_ENT 00023945	Reduviidae	Zelus	armillatus	UNKNOWN	unknown		Unknown			no date provided	Unknown	Adult Female	RMNH	G. Zhang	2012
Other material	Zelus armillatus	(Lepeletier & Serville, 1825)	UCR_ENT 00023946	Reduviidae	Zelus	armillatus	UNKNOWN	unknown		Unknown			no date provided	Unknown	Adult Female	RMNH	G. Zhang	2012
Other material	Zelus armillatus	(Lepeletier & Serville, 1825)	UCR_ENT 00025943	Reduviidae	Zelus	armillatus	BRAZIL	Santa Catarina		Nova Teutonia	-27.1833	-52.3833	1951-10-25	F.Plaumann	Adult Male	USNM	G. Zhang	2012			Label	642 m
Other material	Zelus armillatus	(Lepeletier & Serville, 1825)	UCR_ENT 00025944	Reduviidae	Zelus	armillatus	BRAZIL	Santa Catarina		Nova Teutonia	-27.1833	-52.3833	1952-10-04	F.Plaumann	Adult Male	USNM	G. Zhang	2012			Label	642 m
Other material	Zelus armillatus	(Lepeletier & Serville, 1825)	UCR_ENT 00025945	Reduviidae	Zelus	armillatus	BRAZIL	Santa Catarina		Nova Teutonia	-27.1833	-52.3833	1936-03-11	F.Plaumann	Adult Male	USNM	G. Zhang	2012			Label	642 m
Other material	Zelus armillatus	(Lepeletier & Serville, 1825)	UCR_ENT 00025946	Reduviidae	Zelus	armillatus	BRAZIL	Santa Catarina		Nova Teutonia	-27.1833	-52.3833	1953-10-01	F.Plaumann	Adult Female	USNM	G. Zhang	2012			Label	642 m
Other material	Zelus armillatus	(Lepeletier & Serville, 1825)	UCR_ENT 00025947	Reduviidae	Zelus	armillatus	COLOMBIA	unknown		unknown			no date provided	Unknown	Adult Female	USNM	G. Zhang	2012
Other material	Zelus armillatus	(Lepeletier & Serville, 1825)	UCR_ENT 00025948	Reduviidae	Zelus	armillatus	COLOMBIA	unknown		unknown			no date provided	B.Guevara	Adult Female	USNM	G. Zhang	2012
Other material	Zelus armillatus	(Lepeletier & Serville, 1825)	UCR_ENT 00025949	Reduviidae	Zelus	armillatus	PARAGUAY	Concepcion		Horqueta, 45 miles E of Paraguay River	-23.3428	-57.0597	1933-03-10	Alberto Schultze	Adult Female	USNM	G. Zhang	2012			Gazetteer
Other material	Zelus armillatus	(Lepeletier & Serville, 1825)	UCR_ENT 00029485	Reduviidae	Zelus	armillatus	ARGENTINA	Tucuman		Tucuman, Ciudad Universitaria	-26.7833	-65.35	1959-02-18	J. F. G. Clarke	Adult Male	USNM	G. Zhang	2012			Google Earth	800 m
Other material	Zelus armillatus	(Lepeletier & Serville, 1825)	UCR_ENT 00029486	Reduviidae	Zelus	armillatus	ARGENTINA	Tucuman		Tucuman, Ciudad Universitaria	-26.7833	-65.35	1959-02-18	J. F. G. Clarke	Adult Male	USNM	G. Zhang	2012			Google Earth	800 m
Other material	Zelus armillatus	(Lepeletier & Serville, 1825)	UCR_ENT 00029487	Reduviidae	Zelus	armillatus	ARGENTINA	Tucuman		Tucuman, Ciudad Universitaria	-26.7833	-65.35	1959-02-18	J. F. G. Clarke	Adult Male	USNM	G. Zhang	2012			Google Earth	800 m
Other material	Zelus armillatus	(Lepeletier & Serville, 1825)	UCR_ENT 00029489	Reduviidae	Zelus	armillatus	ARGENTINA	Tucuman		Tucuman, Ciudad Universitaria	-26.7833	-65.35	1959-02-18	J. F. G. Clarke	Adult Male	USNM	G. Zhang	2012			Google Earth	800 m
Other material	Zelus armillatus	(Lepeletier & Serville, 1825)	UCR_ENT 00029490	Reduviidae	Zelus	armillatus	ARGENTINA	Tucuman		Tucuman, Ciudad Universitaria	-26.7833	-65.35	1959-02-18	J. F. G. Clarke	Adult Male	USNM	G. Zhang	2012			Google Earth	800 m
Other material	Zelus armillatus	(Lepeletier & Serville, 1825)	UCR_ENT 00029491	Reduviidae	Zelus	armillatus	ARGENTINA	Tucuman		Tucuman, Ciudad Universitaria	-26.7833	-65.35	1959-02-08	J. F. G. Clarke	Adult Male	USNM	G. Zhang	2012			Google Earth	800 m
Other material	Zelus armillatus	(Lepeletier & Serville, 1825)	UCR_ENT 00029492	Reduviidae	Zelus	armillatus	ARGENTINA	Tucuman		Tucuman, Ciudad Universitaria	-26.7833	-65.35	1959-02-08	J. F. G. Clarke	Adult Female	USNM	G. Zhang	2012			Google Earth	800 m
Other material	Zelus armillatus	(Lepeletier & Serville, 1825)	UCR_ENT 00029493	Reduviidae	Zelus	armillatus	ARGENTINA	Tucuman		Tucuman, Ciudad Universitaria	-26.7833	-65.35	1959-02-08	J. F. G. Clarke	Adult Male	USNM	G. Zhang	2012			Google Earth	800 m
Other material	Zelus armillatus	(Lepeletier & Serville, 1825)	UCR_ENT 00029494	Reduviidae	Zelus	armillatus	ARGENTINA	Tucuman		Tucuman, Ciudad Universitaria	-26.7833	-65.35	1959-02-08	J. F. G. Clarke	Adult Female	USNM	G. Zhang	2012			Google Earth	800 m
Other material	Zelus armillatus	(Lepeletier & Serville, 1825)	UCR_ENT 00029495	Reduviidae	Zelus	armillatus	ARGENTINA	Tucuman		Tucuman, Ciudad Universitaria	-26.7833	-65.35	1959-02-08	J. F. G. Clarke	Adult Female	USNM	G. Zhang	2012			Google Earth	800 m
Other material	Zelus armillatus	(Lepeletier & Serville, 1825)	UCR_ENT 00029496	Reduviidae	Zelus	armillatus	ARGENTINA	Tucuman		Tucuman, Ciudad Universitaria	-26.7833	-65.35	1959-02-08	J. F. G. Clarke	Adult Female	USNM	G. Zhang	2012			Google Earth	800 m
Other material	Zelus armillatus	(Lepeletier & Serville, 1825)	UCR_ENT 00029497	Reduviidae	Zelus	armillatus	ARGENTINA	Tucuman		Tucuman, Ciudad Universitaria	-26.7833	-65.35	1959-02-08	J. F. G. Clarke	Adult Female	USNM	G. Zhang	2012			Google Earth	800 m
Other material	Zelus armillatus	(Lepeletier & Serville, 1825)	UCR_ENT 00029498	Reduviidae	Zelus	armillatus	ARGENTINA	Tucuman		Tucuman, Ciudad Universitaria	-26.7833	-65.35	1959-02-08	J. F. G. Clarke	Adult Female	USNM	G. Zhang	2012			Google Earth	800 m
Other material	Zelus armillatus	(Lepeletier & Serville, 1825)	UCR_ENT 00029500	Reduviidae	Zelus	armillatus	BOLIVIA	Cochabamba		Chapare	-16.5	-65.5	no date provided	Zischka	Adult Female	USNM	G. Zhang	2012			GeoLocate Software	400 m
Other material	Zelus armillatus	(Lepeletier & Serville, 1825)	UCR_ENT 00029501	Reduviidae	Zelus	armillatus	BOLIVIA	Cochabamba		Chapare	-16.5	-65.5	no date provided	Zischka	Adult Female	USNM	G. Zhang	2012			GeoLocate Software	400 m
Other material	Zelus armillatus	(Lepeletier & Serville, 1825)	UCR_ENT 00029502	Reduviidae	Zelus	armillatus	PARAGUAY	Paraguari		Ybycui (25 km SE), in Ybycui National Park	-26.1736	-56.8382	1980-04-12 to 1980-04-24	P. J. Spangler	Adult Male	USNM	G. Zhang	2012			Google Earth	100 m
Other material	Zelus armillatus	(Lepeletier & Serville, 1825)	UCR_ENT 00029503	Reduviidae	Zelus	armillatus	PARAGUAY	Paraguari		Ybycui (25 km SE), in Ybycui National Park	-26.1736	-56.8382	1980-04-12 to 1980-04-25	P. J. Spangler	Adult Male	USNM	G. Zhang	2012			Google Earth	100 m
Other material	Zelus armillatus	(Lepeletier & Serville, 1825)	UCR_ENT 00029504	Reduviidae	Zelus	armillatus	PARAGUAY	Paraguari		Ybycui (25 km SE), in Ybycui National Park	-26.1736	-56.8382	1980-04-12 to 1980-04-26	P. J. Spangler	Adult Male	USNM	G. Zhang	2012			Google Earth	100 m
Other material	Zelus armillatus	(Lepeletier & Serville, 1825)	UCR_ENT 00029505	Reduviidae	Zelus	armillatus	PARAGUAY	Paraguari		Ybycui (25 km SE), in Ybycui National Park	-26.1736	-56.8382	1980-04-12 to 1980-04-27	P. J. Spangler	Adult Male	USNM	G. Zhang	2012			Google Earth	100 m
Other material	Zelus armillatus	(Lepeletier & Serville, 1825)	UCR_ENT 00029506	Reduviidae	Zelus	armillatus	PARAGUAY	Paraguari		Ybycui (25 km SE), in Ybycui National Park	-26.1736	-56.8382	1980-04-12 to 1980-04-28	P. J. Spangler	Adult Male	USNM	G. Zhang	2012			Google Earth	100 m
Other material	Zelus armillatus	(Lepeletier & Serville, 1825)	UCR_ENT 00029507	Reduviidae	Zelus	armillatus	PARAGUAY	Paraguari		Ybycui (25 km SE), in Ybycui National Park	-26.1736	-56.8382	1980-04-12 to 1980-04-29	P. J. Spangler	Adult Female	USNM	G. Zhang	2012			Google Earth	100 m
Other material	Zelus armillatus	(Lepeletier & Serville, 1825)	UCR_ENT 00029508	Reduviidae	Zelus	armillatus	PARAGUAY	Paraguari		Ybycui (25 km SE), in Ybycui National Park	-26.1736	-56.8382	1980-04-12 to 1980-04-30	P. J. Spangler	Adult Female	USNM	G. Zhang	2012			Google Earth	100 m
Other material	Zelus armillatus	(Lepeletier & Serville, 1825)	UCR_ENT 00029509	Reduviidae	Zelus	armillatus	PARAGUAY	Paraguari		Sapucay	-25.6667	-56.9167	no date provided	W. T. Foster	Adult Female	USNM	G. Zhang	2012			Gazetteer
Other material	Zelus armillatus	(Lepeletier & Serville, 1825)	UCR_ENT 00029510	Reduviidae	Zelus	armillatus	BRAZIL	Santa Catarina		Nova Teutonia	-27.1833	-52.3833	1951-10-08	F. Plaumann	Adult Male	USNM	G. Zhang	2012				500 m
Other material	Zelus armillatus	(Lepeletier & Serville, 1825)	UCR_ENT 00029511	Reduviidae	Zelus	armillatus	BRAZIL	Santa Catarina		Nova Teutonia	-27.1833	-52.3833	1951-11-30	F. Plaumann	Adult Male	USNM	G. Zhang	2012				500 m
Other material	Zelus armillatus	(Lepeletier & Serville, 1825)	UCR_ENT 00029512	Reduviidae	Zelus	armillatus	BRAZIL	Santa Catarina		Nova Teutonia	-27.1833	-52.3833	1952-10-20	F. Plaumann	Adult Male	USNM	G. Zhang	2012				500 m
Other material	Zelus armillatus	(Lepeletier & Serville, 1825)	UCR_ENT 00029513	Reduviidae	Zelus	armillatus	BRAZIL	Santa Catarina		Nova Teutonia	-27.1833	-52.3833	1952-10-20	F. Plaumann	Adult Male	USNM	G. Zhang	2012				500 m
Other material	Zelus armillatus	(Lepeletier & Serville, 1825)	UCR_ENT 00029514	Reduviidae	Zelus	armillatus	BRAZIL	Santa Catarina		Nova Teutonia	-27.1833	-52.3833	1952-10-20	F. Plaumann	Adult Male	USNM	G. Zhang	2012				500 m
Other material	Zelus armillatus	(Lepeletier & Serville, 1825)	UCR_ENT 00029517	Reduviidae	Zelus	armillatus	BRAZIL	Santa Catarina		Nova Teutonia	-27.1833	-52.3833	1952-02-05	F. Plaumann	Adult Male	USNM	G. Zhang	2012				500 m
Other material	Zelus armillatus	(Lepeletier & Serville, 1825)	UCR_ENT 00029518	Reduviidae	Zelus	armillatus	BRAZIL	Santa Catarina		Nova Teutonia	-27.1833	-52.3833	1951-10-31	F. Plaumann	Adult Female	USNM	G. Zhang	2012				500 m
Other material	Zelus armillatus	(Lepeletier & Serville, 1825)	UCR_ENT 00029519	Reduviidae	Zelus	armillatus	BRAZIL	Santa Catarina		Nova Teutonia	-27.1833	-52.3833	1951-10-24	F. Plaumann	Adult Female	USNM	G. Zhang	2012				500 m
Other material	Zelus armillatus	(Lepeletier & Serville, 1825)	UCR_ENT 00029520	Reduviidae	Zelus	armillatus	BRAZIL	Santa Catarina		Nova Teutonia	-27.1833	-52.3833	1953-11-01	F. Plaumann	Adult Female	USNM	G. Zhang	2012				500 m
Other material	Zelus armillatus	(Lepeletier & Serville, 1825)	UCR_ENT 00029521	Reduviidae	Zelus	armillatus	BRAZIL	Santa Catarina		Nova Teutonia	-27.1833	-52.3833	1937-10-02	F. Plaumann	Adult Female	USNM	G. Zhang	2012				500 m
Other material	Zelus armillatus	(Lepeletier & Serville, 1825)	UCR_ENT 00029522	Reduviidae	Zelus	armillatus	BRAZIL	Santa Catarina		Nova Teutonia	-27.1833	-52.3833	1951-11-15	F. Plaumann	Adult Female	USNM	G. Zhang	2012				500 m
Other material	Zelus armillatus	(Lepeletier & Serville, 1825)	UCR_ENT 00029523	Reduviidae	Zelus	armillatus	BRAZIL	Santa Catarina		Nova Teutonia	-27.1833	-52.3833	1934-10-22	F. Plaumann	Adult Female	USNM	G. Zhang	2012				500 m
Other material	Zelus armillatus	(Lepeletier & Serville, 1825)	UCR_ENT 00029524	Reduviidae	Zelus	armillatus	VENEZUELA	Vargas		La Guaira	10.6	-66.9333	1918-09-09	H. Morrison	Adult Female	USNM	G. Zhang	2012			Gazetteer	218 m
Other material	Zelus armillatus	(Lepeletier & Serville, 1825)	UCR_ENT 00029525	Reduviidae	Zelus	armillatus	VENEZUELA	Vargas		La Guaira	10.6	-66.9333	1918-09-09	H. Morrison	Adult Female	USNM	G. Zhang	2012			Gazetteer	218 m
Other material	Zelus armillatus	(Lepeletier & Serville, 1825)	UCR_ENT 00029526	Reduviidae	Zelus	armillatus	VENEZUELA	Vargas		La Guaira	10.6	-66.9333	1918-09-09	H. Morrison	Adult Female	USNM	G. Zhang	2012			Gazetteer	218 m
Other material	Zelus armillatus	(Lepeletier & Serville, 1825)	UCR_ENT 00029527	Reduviidae	Zelus	armillatus	VENEZUELA	Vargas		La Guaira	10.6	-66.9333	1918-09-09	H. Morrison	Adult Female	USNM	G. Zhang	2012			Gazetteer	218 m
Other material	Zelus armillatus	(Lepeletier & Serville, 1825)	UCR_ENT 00029528	Reduviidae	Zelus	armillatus	VENEZUELA	Vargas		La Guaira	10.6	-66.9333	1918-09-09	H. Morrison	Adult Female	USNM	G. Zhang	2012			Gazetteer	218 m
Other material	Zelus armillatus	(Lepeletier & Serville, 1825)	UCR_ENT 00029529	Reduviidae	Zelus	armillatus	VENEZUELA	Vargas		La Guaira	10.6	-66.9333	1918-09-09	H. Morrison	Adult Male	USNM	G. Zhang	2012			Gazetteer	218 m
Other material	Zelus armillatus	(Lepeletier & Serville, 1825)	UCR_ENT 00029530	Reduviidae	Zelus	armillatus	VENEZUELA	Vargas		La Guaira	10.6	-66.9333	1918-09-09	H. Morrison	Adult Male	USNM	G. Zhang	2012			Gazetteer	218 m
Other material	Zelus armillatus	(Lepeletier & Serville, 1825)	UCR_ENT 00029531	Reduviidae	Zelus	armillatus	VENEZUELA	Vargas		La Guaira	10.6	-66.9333	1918-09-09	H. Morrison	Adult Male	USNM	G. Zhang	2012			Gazetteer	218 m
Other material	Zelus armillatus	(Lepeletier & Serville, 1825)	UCR_ENT 00029532	Reduviidae	Zelus	armillatus	VENEZUELA	Vargas		La Guaira	10.6	-66.9333	1918-09-09	H. Morrison	Adult Male	USNM	G. Zhang	2012			Gazetteer	218 m
Other material	Zelus armillatus	(Lepeletier & Serville, 1825)	UCR_ENT 00029533	Reduviidae	Zelus	armillatus	VENEZUELA	Vargas		La Guaira	10.6	-66.9333	1918-09-09	H. Morrison	Adult Male	USNM	G. Zhang	2012			Gazetteer	218 m
Other material	Zelus armillatus	(Lepeletier & Serville, 1825)	UCR_ENT 00029534	Reduviidae	Zelus	armillatus	PERU	Junin		Satipo	-11.2667	-74.6833	1941-11-10	P. Paprzycki	Adult sex unknown	USNM	G. Zhang	2012	abdomen missing		Gazetteer
Other material	Zelus armillatus	(Lepeletier & Serville, 1825)	UCR_ENT 00029535	Reduviidae	Zelus	armillatus	PERU	Junin		Satipo	-11.2667	-74.6833	1941-10-12	P. Paprzycki	Adult Male	USNM	G. Zhang	2012			Gazetteer
Other material	Zelus armillatus	(Lepeletier & Serville, 1825)	UCR_ENT 00029536	Reduviidae	Zelus	armillatus	PERU	Junin		Satipo	-11.2667	-74.6833	1941-06-20	P. Paprzycki	Adult Female	USNM	G. Zhang	2012			Gazetteer
Other material	Zelus armillatus	(Lepeletier & Serville, 1825)	UCR_ENT 00029537	Reduviidae	Zelus	armillatus	PERU	Junin		Satipo	-11.2667	-74.6833	1941-11-15	P. Paprzycki	Adult Female	USNM	G. Zhang	2012			Gazetteer
Other material	Zelus armillatus	(Lepeletier & Serville, 1825)	UCR_ENT 00029538	Reduviidae	Zelus	armillatus	PERU	Junin		Satipo	-11.2667	-74.6833	1941-04-07	P. Paprzycki	Adult Female	USNM	G. Zhang	2012			Gazetteer
Other material	Zelus armillatus	(Lepeletier & Serville, 1825)	UCR_ENT 00029539	Reduviidae	Zelus	armillatus	PERU	Huanuco		Tingo Maria (Town of)	-9.3	-75.9833	1947-03-01	Weyrauch	Adult Male	USNM	G. Zhang	2012			GeoLocate Software	671 m
Other material	Zelus armillatus	(Lepeletier & Serville, 1825)	UCR_ENT 00029543	Reduviidae	Zelus	armillatus	BRAZIL	Mato Grosso do Sul		Corumba	-19.012	-57.624	no date provided	Unknown	Adult Female	USNM	G. Zhang	2012			Atlas
Other material	Zelus armillatus	(Lepeletier & Serville, 1825)	UCR_ENT 00029544	Reduviidae	Zelus	armillatus	BRAZIL	Mato Grosso do Sul		Corumba	-19.012	-57.624	no date provided	Unknown	Adult Female	USNM	G. Zhang	2012			Atlas
Other material	Zelus armillatus	(Lepeletier & Serville, 1825)	UCR_ENT 00029546	Reduviidae	Zelus	armillatus	BRAZIL	unknown		Annapolis	-16.3333	-48.9667	1936-11-12	G. Fairchild	Adult Female	USNM	G. Zhang	2012				917 m
Other material	Zelus armillatus	(Lepeletier & Serville, 1825)	UCR_ENT 00029547	Reduviidae	Zelus	armillatus	GUYANA	Cuyuni-Mazaruni Region		Bartica , or 'Kartabo-Bartica'	6.4	-58.6166	no date provided	Unknown	Adult Female	USNM	G. Zhang	2012			GeoLocate Software	1 m
Other material	Zelus armillatus	(Lepeletier & Serville, 1825)	UCR_ENT 00029549	Reduviidae	Zelus	armillatus	ARGENTINA	Misiones		Iguazu	-25.5667	-54.5667	1982-12-01	Unknown	Adult Female	USNM	G. Zhang	2012			Gazetteer	162 m
Other material	Zelus armillatus	(Lepeletier & Serville, 1825)	UCR_ENT 00029550	Reduviidae	Zelus	armillatus	ARGENTINA	Misiones		Iguazu	-25.5667	-54.5667	1983-11-01	Unknown	Adult Female	USNM	G. Zhang	2012			Gazetteer	162 m
Other material	Zelus armillatus	(Lepeletier & Serville, 1825)	UCR_ENT 00029551	Reduviidae	Zelus	armillatus	ARGENTINA	Misiones		Iguazu	-25.5667	-54.5667	1984-10-01	Unknown	Adult Female	USNM	G. Zhang	2012			Gazetteer	162 m
Other material	Zelus armillatus	(Lepeletier & Serville, 1825)	UCR_ENT 00029552	Reduviidae	Zelus	armillatus	ARGENTINA	Misiones		2 de Mayo	-27.0333	-54.65	1985-11-01	Unknown	Adult Female	USNM	G. Zhang	2012			Gazetteer
Other material	Zelus armillatus	(Lepeletier & Serville, 1825)	UCR_ENT 00029553	Reduviidae	Zelus	armillatus	ARGENTINA	Misiones		2 de Mayo	-27.0333	-54.65	1985-11-01	Unknown	Adult Female	USNM	G. Zhang	2012			Gazetteer
Other material	Zelus armillatus	(Lepeletier & Serville, 1825)	UCR_ENT 00029554	Reduviidae	Zelus	armillatus	BOLIVIA	La Paz		Guanay	-15.4833	-67.8833	1993-10-01 to 1993-11-01	L. Pena	Adult Male	USNM	G. Zhang	2012	Drake collection		Gazetteer
Other material	Zelus armillatus	(Lepeletier & Serville, 1825)	UCR_ENT 00029555	Reduviidae	Zelus	armillatus	BOLIVIA	La Paz		Guanay	-15.4833	-67.8833	1993-10-01 to 1993-11-01	L. Pena	Adult Male	USNM	G. Zhang	2012			Gazetteer
Other material	Zelus armillatus	(Lepeletier & Serville, 1825)	UCR_ENT 00029556	Reduviidae	Zelus	armillatus	BOLIVIA	La Paz		Guanay	-15.4833	-67.8833	1993-10-01 to 1993-11-01	L. Pena	Adult Male	USNM	G. Zhang	2012			Gazetteer
Other material	Zelus armillatus	(Lepeletier & Serville, 1825)	UCR_ENT 00029557	Reduviidae	Zelus	armillatus	BOLIVIA	La Paz		Guanay	-15.4833	-67.8833	1993-10-01 to 1993-11-01	L. Pena	Adult Male	USNM	G. Zhang	2012			Gazetteer
Other material	Zelus armillatus	(Lepeletier & Serville, 1825)	UCR_ENT 00029558	Reduviidae	Zelus	armillatus	BOLIVIA	La Paz		Guanay	-15.4833	-67.8833	1993-10-01 to 1993-11-01	L. Pena	Adult Male	USNM	G. Zhang	2012			Gazetteer
Other material	Zelus armillatus	(Lepeletier & Serville, 1825)	UCR_ENT 00029559	Reduviidae	Zelus	armillatus	BOLIVIA	La Paz		Guanay	-15.4833	-67.8833	1993-10-01 to 1993-11-01	L. Pena	Adult Male	USNM	G. Zhang	2012			Gazetteer
Other material	Zelus armillatus	(Lepeletier & Serville, 1825)	UCR_ENT 00029560	Reduviidae	Zelus	armillatus	BOLIVIA	La Paz		Guanay	-15.4833	-67.8833	1993-10-01 to 1993-11-01	L. Pena	Adult Male	USNM	G. Zhang	2012	Drake collection		Gazetteer
Other material	Zelus armillatus	(Lepeletier & Serville, 1825)	UCR_ENT 00029561	Reduviidae	Zelus	armillatus	BOLIVIA	La Paz		Guanay	-15.4833	-67.8833	1993-10-01 to 1993-11-01	L. Pena	Adult Male	USNM	G. Zhang	2012	Drake collection		Gazetteer
Other material	Zelus armillatus	(Lepeletier & Serville, 1825)	UCR_ENT 00029562	Reduviidae	Zelus	armillatus	BOLIVIA	La Paz		Guanay	-15.4833	-67.8833	1993-10-01 to 1993-11-01	L. Pena	Adult Male	USNM	G. Zhang	2012	Drake collection		Gazetteer
Other material	Zelus armillatus	(Lepeletier & Serville, 1825)	UCR_ENT 00029563	Reduviidae	Zelus	armillatus	BOLIVIA	La Paz		Guanay	-15.4833	-67.8833	1993-10-01 to 1993-11-01	L. Pena	Adult Male	USNM	G. Zhang	2012	Drake collection		Gazetteer
Other material	Zelus armillatus	(Lepeletier & Serville, 1825)	UCR_ENT 00029564	Reduviidae	Zelus	armillatus	BOLIVIA	La Paz		Guanay	-15.4833	-67.8833	1993-10-01 to 1993-11-01	L. Pena	Adult Male	USNM	G. Zhang	2012	Drake collection		Gazetteer
Other material	Zelus armillatus	(Lepeletier & Serville, 1825)	UCR_ENT 00029565	Reduviidae	Zelus	armillatus	BOLIVIA	La Paz		Guanay	-15.4833	-67.8833	1993-10-01 to 1993-11-01	L. Pena	Adult Female	USNM	G. Zhang	2012	Drake collection		Gazetteer
Other material	Zelus armillatus	(Lepeletier & Serville, 1825)	UCR_ENT 00029566	Reduviidae	Zelus	armillatus	BOLIVIA	La Paz		Guanay	-15.4833	-67.8833	1993-10-01 to 1993-11-01	L. Pena	Adult Female	USNM	G. Zhang	2012	Drake collection		Gazetteer
Other material	Zelus armillatus	(Lepeletier & Serville, 1825)	UCR_ENT 00029567	Reduviidae	Zelus	armillatus	BOLIVIA	La Paz		Guanay	-15.4833	-67.8833	1993-10-01 to 1993-11-01	L. Pena	Adult Female	USNM	G. Zhang	2012	Drake collection		Gazetteer
Other material	Zelus armillatus	(Lepeletier & Serville, 1825)	UCR_ENT 00029568	Reduviidae	Zelus	armillatus	BOLIVIA	La Paz		Guanay	-15.4833	-67.8833	1993-10-01 to 1993-11-01	L. Pena	Adult Female	USNM	G. Zhang	2012	Drake collection		Gazetteer
Other material	Zelus armillatus	(Lepeletier & Serville, 1825)	UCR_ENT 00029569	Reduviidae	Zelus	armillatus	BOLIVIA	La Paz		Guanay	-15.4833	-67.8833	1993-10-01 to 1993-11-01	L. Pena	Adult Female	USNM	G. Zhang	2012	Drake collection		Gazetteer
Other material	Zelus armillatus	(Lepeletier & Serville, 1825)	UCR_ENT 00029570	Reduviidae	Zelus	armillatus	BOLIVIA	La Paz		Guanay	-15.4833	-67.8833	1993-10-01 to 1993-11-01	L. Pena	Adult Female	USNM	G. Zhang	2012	Drake collection		Gazetteer
Other material	Zelus armillatus	(Lepeletier & Serville, 1825)	UCR_ENT 00029571	Reduviidae	Zelus	armillatus	BOLIVIA	La Paz		Guanay	-15.4833	-67.8833	1993-10-01 to 1993-11-01	L. Pena	Adult Female	USNM	G. Zhang	2012	Drake collection		Gazetteer
Other material	Zelus armillatus	(Lepeletier & Serville, 1825)	UCR_ENT 00029572	Reduviidae	Zelus	armillatus	BOLIVIA	La Paz		Guanay	-15.4833	-67.8833	1993-10-01 to 1993-11-01	L. Pena	Adult Female	USNM	G. Zhang	2012	Drake collection		Gazetteer
Other material	Zelus armillatus	(Lepeletier & Serville, 1825)	UCR_ENT 00029573	Reduviidae	Zelus	armillatus	BOLIVIA	La Paz		Guanay	-15.4833	-67.8833	1993-10-01 to 1993-11-01	L. Pena	Adult Female	USNM	G. Zhang	2012	Drake collection		Gazetteer
Other material	Zelus armillatus	(Lepeletier & Serville, 1825)	UCR_ENT 00029574	Reduviidae	Zelus	armillatus	BOLIVIA	La Paz		Guanay	-15.4833	-67.8833	1993-10-01 to 1993-11-01	L. Pena	Adult Female	USNM	G. Zhang	2012	Drake collection		Gazetteer
Other material	Zelus armillatus	(Lepeletier & Serville, 1825)	UCR_ENT 00029575	Reduviidae	Zelus	armillatus	BOLIVIA	La Paz		Guanay	-15.4833	-67.8833	1993-10-01 to 1993-11-01	L. Pena	Adult Female	USNM	G. Zhang	2012	Drake collection		Gazetteer
Other material	Zelus armillatus	(Lepeletier & Serville, 1825)	UCR_ENT 00029576	Reduviidae	Zelus	armillatus	BOLIVIA	La Paz		Guanay	-15.4833	-67.8833	1993-10-01 to 1993-11-01	L. Pena	Adult Female	USNM	G. Zhang	2012	Drake collection		Gazetteer
Other material	Zelus armillatus	(Lepeletier & Serville, 1825)	UCR_ENT 00029577	Reduviidae	Zelus	armillatus	BOLIVIA	La Paz		Guanay	-15.4833	-67.8833	1993-10-01 to 1993-11-01	L. Pena	Adult Female	USNM	G. Zhang	2012	Drake collection		Gazetteer
Other material	Zelus armillatus	(Lepeletier & Serville, 1825)	UCR_ENT 00029578	Reduviidae	Zelus	armillatus	BOLIVIA	La Paz		Guanay	-15.4833	-67.8833	1993-10-01 to 1993-11-01	L. Pena	Adult Female	USNM	G. Zhang	2012	Drake collection		Gazetteer
Other material	Zelus armillatus	(Lepeletier & Serville, 1825)	UCR_ENT 00029579	Reduviidae	Zelus	armillatus	BOLIVIA	La Paz		Guanay	-15.4833	-67.8833	1993-10-01 to 1993-11-01	L. Pena	Adult Female	USNM	G. Zhang	2012	Drake collection		Gazetteer
Other material	Zelus armillatus	(Lepeletier & Serville, 1825)	UCR_ENT 00029580	Reduviidae	Zelus	armillatus	BOLIVIA	La Paz		Guanay	-15.4833	-67.8833	1993-10-01 to 1993-11-01	L. Pena	Adult Female	USNM	G. Zhang	2012	Drake collection		Gazetteer
Other material	Zelus armillatus	(Lepeletier & Serville, 1825)	UCR_ENT 00029581	Reduviidae	Zelus	armillatus	BOLIVIA	La Paz		Guanay	-15.4833	-67.8833	1993-10-01 to 1993-11-01	L. Pena	Adult Female	USNM	G. Zhang	2012	Drake collection		Gazetteer
Other material	Zelus armillatus	(Lepeletier & Serville, 1825)	UCR_ENT 00029582	Reduviidae	Zelus	armillatus	BOLIVIA	La Paz		Guanay	-15.4833	-67.8833	1993-10-01 to 1993-11-01	L. Pena	Adult sex unknown	USNM	G. Zhang	2012	Drake collection. Abdomen missing		Gazetteer
Other material	Zelus armillatus	(Lepeletier & Serville, 1825)	UCR_ENT 00029583	Reduviidae	Zelus	armillatus	BOLIVIA	La Paz		Guanay	-15.4833	-67.8833	1993-10-01 to 1993-11-01	L. Pena	Adult Female	USNM	G. Zhang	2012	Drake collection		Gazetteer
Other material	Zelus armillatus	(Lepeletier & Serville, 1825)	UCR_ENT 00029584	Reduviidae	Zelus	armillatus	BOLIVIA	La Paz		Guanay	-15.4833	-67.8833	1993-10-01 to 1993-11-01	L. Pena	Adult Female	USNM	G. Zhang	2012	Drake collection		Gazetteer
Other material	Zelus armillatus	(Lepeletier & Serville, 1825)	UCR_ENT 00029585	Reduviidae	Zelus	armillatus	BOLIVIA	La Paz		Guanay	-15.4833	-67.8833	1993-10-01 to 1993-11-01	L. Pena	Adult Female	USNM	G. Zhang	2012	Drake collection		Gazetteer
Other material	Zelus armillatus	(Lepeletier & Serville, 1825)	UCR_ENT 00029586	Reduviidae	Zelus	armillatus	BOLIVIA	La Paz		Guanay	-15.4833	-67.8833	1993-10-01 to 1993-11-01	L. Pena	Adult Female	USNM	G. Zhang	2012	Drake collection		Gazetteer
Other material	Zelus armillatus	(Lepeletier & Serville, 1825)	UCR_ENT 00029587	Reduviidae	Zelus	armillatus	BOLIVIA	La Paz		Guanay	-15.4833	-67.8833	1993-10-01 to 1993-11-01	L. Pena	Adult Female	USNM	G. Zhang	2012	Drake collection		Gazetteer
Other material	Zelus armillatus	(Lepeletier & Serville, 1825)	UCR_ENT 00029588	Reduviidae	Zelus	armillatus	BOLIVIA	La Paz		Guanay	-15.4833	-67.8833	1993-10-01 to 1993-11-01	L. Pena	Adult Female	USNM	G. Zhang	2012	Drake collection		Gazetteer
Other material	Zelus armillatus	(Lepeletier & Serville, 1825)	UCR_ENT 00029589	Reduviidae	Zelus	armillatus	BOLIVIA	La Paz		Guanay	-15.4833	-67.8833	1993-10-01 to 1993-11-01	L. Pena	Adult Female	USNM	G. Zhang	2012	Drake collection		Gazetteer
Other material	Zelus armillatus	(Lepeletier & Serville, 1825)	UCR_ENT 00029590	Reduviidae	Zelus	armillatus	BOLIVIA	La Paz		Guanay	-15.4833	-67.8833	1993-10-01 to 1993-11-01	L. Pena	Adult Female	USNM	G. Zhang	2012	Drake collection		Gazetteer
Other material	Zelus armillatus	(Lepeletier & Serville, 1825)	UCR_ENT 00029591	Reduviidae	Zelus	armillatus	BOLIVIA	La Paz		Guanay	-15.4833	-67.8833	1993-10-01 to 1993-11-01	L. Pena	Adult Female	USNM	G. Zhang	2012	Drake collection		Gazetteer
Other material	Zelus armillatus	(Lepeletier & Serville, 1825)	UCR_ENT 00029592	Reduviidae	Zelus	armillatus	BOLIVIA	La Paz		Guanay	-15.4833	-67.8833	1993-10-01 to 1993-11-01	L. Pena	Adult Female	USNM	G. Zhang	2012	Drake collection		Gazetteer
Other material	Zelus armillatus	(Lepeletier & Serville, 1825)	UCR_ENT 00029593	Reduviidae	Zelus	armillatus	BOLIVIA	La Paz		Guanay	-15.4833	-67.8833	1993-10-01 to 1993-11-01	L. Pena	Adult Female	USNM	G. Zhang	2012	Drake collection		Gazetteer
Other material	Zelus armillatus	(Lepeletier & Serville, 1825)	UCR_ENT 00029594	Reduviidae	Zelus	armillatus	BOLIVIA	La Paz		Guanay	-15.4833	-67.8833	1993-10-01 to 1993-11-01	L. Pena	Adult Female	USNM	G. Zhang	2012	Drake collection		Gazetteer
Other material	Zelus armillatus	(Lepeletier & Serville, 1825)	UCR_ENT 00029595	Reduviidae	Zelus	armillatus	BOLIVIA	La Paz		Guanay	-15.4833	-67.8833	1993-10-01 to 1993-11-01	L. Pena	Adult Female	USNM	G. Zhang	2012	Drake collection		Gazetteer
Other material	Zelus armillatus	(Lepeletier & Serville, 1825)	UCR_ENT 00029596	Reduviidae	Zelus	armillatus	BOLIVIA	La Paz		Guanay	-15.4833	-67.8833	1993-10-01 to 1993-11-01	L. Pena	Adult Female	USNM	G. Zhang	2012	Drake collection		Gazetteer
Other material	Zelus armillatus	(Lepeletier & Serville, 1825)	UCR_ENT 00029597	Reduviidae	Zelus	armillatus	BOLIVIA	La Paz		Guanay	-15.4833	-67.8833	1993-10-01 to 1993-11-01	L. Pena	Adult Female	USNM	G. Zhang	2012	Drake collection		Gazetteer
Other material	Zelus armillatus	(Lepeletier & Serville, 1825)	UCR_ENT 00029598	Reduviidae	Zelus	armillatus	BOLIVIA	La Paz		Guanay	-15.4833	-67.8833	1993-10-01 to 1993-11-01	L. Pena	Adult Female	USNM	G. Zhang	2012	Drake collection		Gazetteer
Other material	Zelus armillatus	(Lepeletier & Serville, 1825)	UCR_ENT 00029599	Reduviidae	Zelus	armillatus	BOLIVIA	La Paz		Guanay	-15.4833	-67.8833	1993-10-01 to 1993-11-01	L. Pena	Adult Female	USNM	G. Zhang	2012	Drake collection		Gazetteer
Other material	Zelus armillatus	(Lepeletier & Serville, 1825)	UCR_ENT 00029600	Reduviidae	Zelus	armillatus	BOLIVIA	La Paz		Guanay	-15.4833	-67.8833	1993-10-01 to 1993-11-01	L. Pena	Adult Female	USNM	G. Zhang	2012	Drake collection		Gazetteer
Other material	Zelus armillatus	(Lepeletier & Serville, 1825)	UCR_ENT 00029601	Reduviidae	Zelus	armillatus	BOLIVIA	La Paz		Guanay	-15.4833	-67.8833	1993-10-01 to 1993-11-01	L. Pena	Adult Female	USNM	G. Zhang	2012	Drake collection		Gazetteer
Other material	Zelus armillatus	(Lepeletier & Serville, 1825)	UCR_ENT 00029602	Reduviidae	Zelus	armillatus	BOLIVIA	La Paz		Guanay	-15.4833	-67.8833	1993-10-01 to 1993-11-01	L. Pena	Adult Female	USNM	G. Zhang	2012	Drake collection		Gazetteer
Other material	Zelus armillatus	(Lepeletier & Serville, 1825)	UCR_ENT 00029603	Reduviidae	Zelus	armillatus	BOLIVIA	Cochabamba		Sajta, Chapare	-17.0086	-64.7866	1993-11-01	Unknown	Adult Male	USNM	G. Zhang	2012	Drake collection		Google Earth
Other material	Zelus armillatus	(Lepeletier & Serville, 1825)	UCR_ENT 00029604	Reduviidae	Zelus	armillatus	BOLIVIA	Cochabamba		Sajta, Chapare	-17.0086	-64.7866	1993-11-01	Unknown	Adult Male	USNM	G. Zhang	2012	Drake collection		Google Earth
Other material	Zelus armillatus	(Lepeletier & Serville, 1825)	UCR_ENT 00029605	Reduviidae	Zelus	armillatus	BOLIVIA	Cochabamba		Sajta, Chapare	-17.0086	-64.7866	1993-11-01	Unknown	Adult Male	USNM	G. Zhang	2012	Drake collection		Google Earth
Other material	Zelus armillatus	(Lepeletier & Serville, 1825)	UCR_ENT 00029606	Reduviidae	Zelus	armillatus	BOLIVIA	Cochabamba		Sajta, Chapare	-17.0086	-64.7866	1993-11-01	Unknown	Adult Female	USNM	G. Zhang	2012	Drake collection		Google Earth
Other material	Zelus armillatus	(Lepeletier & Serville, 1825)	UCR_ENT 00029607	Reduviidae	Zelus	armillatus	BOLIVIA	Cochabamba		Sajta, Chapare	-17.0086	-64.7866	1993-11-01	Unknown	Adult Female	USNM	G. Zhang	2012	Drake collection		Google Earth
Other material	Zelus armillatus	(Lepeletier & Serville, 1825)	UCR_ENT 00029608	Reduviidae	Zelus	armillatus	BOLIVIA	Cochabamba		Sajta, Chapare	-17.0086	-64.7866	1993-11-01	Unknown	Adult Female	USNM	G. Zhang	2012	Drake collection		Google Earth
Other material	Zelus armillatus	(Lepeletier & Serville, 1825)	UCR_ENT 00029609	Reduviidae	Zelus	armillatus	BOLIVIA	Cochabamba		Sajta, Chapare	-17.0086	-64.7866	1993-11-01	Unknown	Adult Female	USNM	G. Zhang	2012	Drake collection		Google Earth
Other material	Zelus armillatus	(Lepeletier & Serville, 1825)	UCR_ENT 00029610	Reduviidae	Zelus	armillatus	BOLIVIA	Cochabamba		Sajta, Chapare	-17.0086	-64.7866	1993-11-01	Unknown	Adult Female	USNM	G. Zhang	2012	Drake collection		Google Earth
Other material	Zelus armillatus	(Lepeletier & Serville, 1825)	UCR_ENT 00029611	Reduviidae	Zelus	armillatus	BOLIVIA	Cochabamba		Sajta, Chapare	-17.0086	-64.7866	1993-11-01	Unknown	Adult Female	USNM	G. Zhang	2012	Drake collection		Google Earth
Other material	Zelus armillatus	(Lepeletier & Serville, 1825)	UCR_ENT 00029612	Reduviidae	Zelus	armillatus	BOLIVIA	La Paz		Uyapi (Guanay)	-15.4167	-67.7667	1994-10-01	G. Castillo	Adult Female	USNM	G. Zhang	2012	Drake collection		Gazetteer
Other material	Zelus armillatus	(Lepeletier & Serville, 1825)	UCR_ENT 00029613	Reduviidae	Zelus	armillatus	ARGENTINA	Jujuy		Las Maderas	-24.45	-65.25	1992-02-21	L. E. Peña	Adult Male	USNM	G. Zhang	2012	Drake collection			3936 m
Other material	Zelus armillatus	(Lepeletier & Serville, 1825)	UCR_ENT 00029614	Reduviidae	Zelus	armillatus	ARGENTINA	Jujuy		Las Maderas	-24.45	-65.25	1992-02-21	L. E. Peña	Adult Male	USNM	G. Zhang	2012	Drake collection			3936 m
Other material	Zelus armillatus	(Lepeletier & Serville, 1825)	UCR_ENT 00029615	Reduviidae	Zelus	armillatus	ARGENTINA	Jujuy		Las Maderas	-24.45	-65.25	1992-02-21	L. E. Peña	Adult Female	USNM	G. Zhang	2012	Drake collection			3936 m
Other material	Zelus armillatus	(Lepeletier & Serville, 1825)	UCR_ENT 00030183	Reduviidae	Zelus	armillatus	PERU	Junin		Satipo	-11.2522	-74.6386	1941-08-15	P. Paprzycki	Adult Female	USNM	G. Zhang	2012			Gazetteer
Other material	Zelus armillatus	(Lepeletier & Serville, 1825)	UCR_ENT 00030184	Reduviidae	Zelus	armillatus	PERU	Junin		Satipo	-11.2522	-74.6386	1941-09-18	P. Paprzycki	Adult Female	USNM	G. Zhang	2012			Gazetteer
Other material	Zelus armillatus	(Lepeletier & Serville, 1825)	UCR_ENT 00030185	Reduviidae	Zelus	armillatus	PERU	Junin		Satipo	-11.2522	-74.6386	1941-09-18	P. Paprzycki	Adult Female	USNM	G. Zhang	2012			Gazetteer
Other material	Zelus armillatus	(Lepeletier & Serville, 1825)	UCR_ENT 00030186	Reduviidae	Zelus	armillatus	PERU	Junin		Satipo	-11.2522	-74.6386	1941-08-27	P. Paprzycki	Adult Female	USNM	G. Zhang	2012			Gazetteer
Other material	Zelus armillatus	(Lepeletier & Serville, 1825)	UCR_ENT 00030187	Reduviidae	Zelus	armillatus	PERU	Huanuco	Leoncio Prado	Tingo Maria	-9.3	-75.9833	1946-11-01	Weyrauch	Adult Female	USNM	G. Zhang	2012				671 m
Other material	Zelus armillatus	(Lepeletier & Serville, 1825)	UCR_ENT 00030188	Reduviidae	Zelus	armillatus	PERU	Huanuco		Tingo Maria (Town of)	-9.3	-75.9833	1950-02-18	H. A. Allard	Adult Female	USNM	G. Zhang	2012			GeoLocate Software	671 m
Other material	Zelus armillatus	(Lepeletier & Serville, 1825)	UCR_ENT 00030189	Reduviidae	Zelus	armillatus	PERU	Huanuco	Leoncio Prado	Tingo Maria	-9.32049	-76.0051	1945-10-01	Weyrauch	Adult Female	USNM	G. Zhang	2012			Google Earth	620 m
Other material	Zelus armillatus	(Lepeletier & Serville, 1825)	UCR_ENT 00030234	Reduviidae	Zelus	armillatus	COLOMBIA	Meta		Cano Grande	3.11171	-73.8369	1944-02-14	Richter	Adult Female	USNM	G. Zhang	2012				500 m
Other material	Zelus armillatus	(Lepeletier & Serville, 1825)	UCR_ENT 00030235	Reduviidae	Zelus	armillatus	ARGENTINA	Misiones		Iguazu	-25.5667	-54.5667	1981-04-01	Unknown	Adult Female	USNM	G. Zhang	2012			Gazetteer	162 m
Other material	Zelus armillatus	(Lepeletier & Serville, 1825)	UCR_ENT 00030236	Reduviidae	Zelus	armillatus	ARGENTINA	Misiones		Unknown			1986-01-01	Unknown	Adult Female	USNM	G. Zhang	2012
Other material	Zelus armillatus	(Lepeletier & Serville, 1825)	UCR_ENT 00030237	Reduviidae	Zelus	armillatus	ARGENTINA	Misiones		Dos de Mayo	-27.0333	-54.65	1989-11-01	Unknown	Adult Female	USNM	G. Zhang	2012			GeoLocate Software	522 m
Other material	Zelus armillatus	(Lepeletier & Serville, 1825)	UCR_ENT 00030238	Reduviidae	Zelus	armillatus	ARGENTINA	Misiones		Unknown			1986-01-01	Unknown	Adult Female	USNM	G. Zhang	2012
Other material	Zelus armillatus	(Lepeletier & Serville, 1825)	UCR_ENT 00030239	Reduviidae	Zelus	armillatus	ARGENTINA	Misiones		Unknown			1941-11-23 to 1941-11-24	H. L. Parker	Adult Female	USNM	G. Zhang	2012
Other material	Zelus armillatus	(Lepeletier & Serville, 1825)	UCR_ENT 00030240	Reduviidae	Zelus	armillatus	ARGENTINA	Misiones		Unknown			1941-11-23 to 1941-11-24	H. L. Parker	Adult Female	USNM	G. Zhang	2012
Other material	Zelus armillatus	(Lepeletier & Serville, 1825)	UCR_ENT 00030241	Reduviidae	Zelus	armillatus	ARGENTINA	unknown		unknown			no date provided	R. C. Shannon	Adult Male	USNM	G. Zhang	2012
Other material	Zelus armillatus	(Lepeletier & Serville, 1825)	UCR_ENT 00030242	Reduviidae	Zelus	armillatus	ARGENTINA	unknown		unknown			no date provided	R. C. Shannon	Adult Male	USNM	G. Zhang	2012
Other material	Zelus armillatus	(Lepeletier & Serville, 1825)	UCR_ENT 00030243	Reduviidae	Zelus	armillatus	ARGENTINA	Tucuman		unknown			1951-04-25	Unknown	Adult Male	USNM	G. Zhang	2012
Other material	Zelus armillatus	(Lepeletier & Serville, 1825)	UCR_ENT 00030244	Reduviidae	Zelus	armillatus	BRAZIL	Santa Catarina		Nova Teutonia	-27.1833	-52.3833	1951-09-01	F. Plaumann	Adult Male	USNM	G. Zhang	2012				500 m
Other material	Zelus armillatus	(Lepeletier & Serville, 1825)	UCR_ENT 00030245	Reduviidae	Zelus	armillatus	BRAZIL	Santa Catarina		Nova Teutonia	-27.1833	-52.3833	1951-10-26	F. Plaumann	Adult Male	USNM	G. Zhang	2012				500 m
Other material	Zelus armillatus	(Lepeletier & Serville, 1825)	UCR_ENT 00030246	Reduviidae	Zelus	armillatus	BRAZIL	Santa Catarina		Nova Teutonia	-27.1833	-52.3833	1951-11-01	F. Plaumann	Adult Male	USNM	G. Zhang	2012				500 m
Other material	Zelus armillatus	(Lepeletier & Serville, 1825)	UCR_ENT 00030714	Reduviidae	Zelus	armillatus	BOLIVIA	Cochabamba		Sajito			1993-02-01	L. E. Peña	Adult Female	USNM	G. Zhang	2012	Drake Colln.
Other material	Zelus armillatus	(Lepeletier & Serville, 1825)	UCR_ENT 00030715	Reduviidae	Zelus	armillatus	BOLIVIA	Cochabamba		Sajito			1993-02-01	L. E. Peña	Adult Female	USNM	G. Zhang	2012	Drake Colln.
Other material	Zelus armillatus	(Lepeletier & Serville, 1825)	UCR_ENT 00030716	Reduviidae	Zelus	armillatus	BOLIVIA	Cochabamba		Sajta, Chapare	-17.0086	-64.7866	1992-03-01	L. E. Peña	Adult Female	USNM	G. Zhang	2012	Drake Colln.		Google Earth
Other material	Zelus armillatus	(Lepeletier & Serville, 1825)	UCR_ENT 00030717	Reduviidae	Zelus	armillatus	COLOMBIA	Vaupes		Mitu	1.1983	-70.1733	1990-07-06 to 1990-07-17	L. E. Peña	Adult Female	USNM	G. Zhang	2012	Drake Colln.		Gazetteer	184 m
Other material	Zelus armillatus	(Lepeletier & Serville, 1825)	UCR_ENT 00030718	Reduviidae	Zelus	armillatus	BOLIVIA	Cochabamba		Sajito			1993-02-01	L. E. Peña	Adult Female	USNM	G. Zhang	2012	Drake Colln.
Other material	Zelus armillatus	(Lepeletier & Serville, 1825)	UCR_ENT 00030719	Reduviidae	Zelus	armillatus	PARAGUAY	Itapua		Encarnacion	-27.3333	-55.9	1991-02-28	Unknown	Adult Female	USNM	G. Zhang	2012	Drake Colln.		Gazetteer
Other material	Zelus armillatus	(Lepeletier & Serville, 1825)	UCR_ENT 00030720	Reduviidae	Zelus	armillatus	PARAGUAY	Central		Capiata	-25.35	-57.4167	1994-11-21	Unknown	Adult Female	USNM	G. Zhang	2012	Drake Colln.		Gazetteer
Other material	Zelus armillatus	(Lepeletier & Serville, 1825)	UCR_ENT 00030721	Reduviidae	Zelus	armillatus	BOLIVIA	Chapare		Rio Ronquito			1984-12-09 to 1984-12-11	L. E. Peña	Adult Female	USNM	G. Zhang	2012	Drake Colln.			1900 m
Other material	Zelus armillatus	(Lepeletier & Serville, 1825)	UCR_ENT 00030722	Reduviidae	Zelus	armillatus	PARAGUAY	Alto Parana		Reserva Biologico Tati Yupi	-25.3678	-54.5785	1989-10-19 to 1989-10-23	Unknown	Adult Female	USNM	G. Zhang	2012	Drake Colln.		Google Earth
Other material	Zelus armillatus	(Lepeletier & Serville, 1825)	UCR_ENT 00030723	Reduviidae	Zelus	armillatus	ARGENTINA	Salta		Campo Alegre			1992-02-23	L. E. Peña	Adult Female	USNM	G. Zhang	2012	Drake Colln.
Other material	Zelus armillatus	(Lepeletier & Serville, 1825)	UCR_ENT 00030724	Reduviidae	Zelus	armillatus	ARGENTINA	Salta		Campo Alegre			1992-02-23	L. E. Peña	Adult Female	USNM	G. Zhang	2012	Drake Colln.
Other material	Zelus armillatus	(Lepeletier & Serville, 1825)	UCR_ENT 00030725	Reduviidae	Zelus	armillatus	PERU	Junin		Satipo	-11.2667	-74.6833	1940-08-01	P. Paprzycki	Adult Female	USNM	G. Zhang	2012	Drake Colln.		Gazetteer
Other material	Zelus armillatus	(Lepeletier & Serville, 1825)	UCR_ENT 00030726	Reduviidae	Zelus	armillatus	ARGENTINA	Salta		Campo Alegre			1992-02-23	L. E. Peña	Adult Female	USNM	G. Zhang	2012	Drake Colln.
Other material	Zelus armillatus	(Lepeletier & Serville, 1825)	UCR_ENT 00030727	Reduviidae	Zelus	armillatus	ARGENTINA	Salta		Alemania	-25.6	-65.6333	1992-02-22	L. E. Peña	Adult Female	USNM	G. Zhang	2012	Drake Colln.		GeoLocate Software
Other material	Zelus armillatus	(Lepeletier & Serville, 1825)	UCR_ENT 00030728	Reduviidae	Zelus	armillatus	ARGENTINA	Salta		Campo Alegre			1992-02-23	L. E. Peña	Adult Female	USNM	G. Zhang	2012	Drake Colln.
Other material	Zelus armillatus	(Lepeletier & Serville, 1825)	UCR_ENT 00030729	Reduviidae	Zelus	armillatus	ARGENTINA	Salta		Campo Alegre			1992-02-23	L. E. Peña	Adult Female	USNM	G. Zhang	2012	Drake Colln.
Other material	Zelus armillatus	(Lepeletier & Serville, 1825)	UCR_ENT 00030730	Reduviidae	Zelus	armillatus	ARGENTINA	Salta		Campo Alegre			1992-02-23	L. E. Peña	Adult Female	USNM	G. Zhang	2012	Drake Colln.
Other material	Zelus armillatus	(Lepeletier & Serville, 1825)	UCR_ENT 00030731	Reduviidae	Zelus	armillatus	ARGENTINA	Tucuman		San Pedro Colalao	-26.2333	-65.4833	1978-03-01	Unknown	Adult Female	USNM	G. Zhang	2012	Drake Colln.		Gazetteer	1057 m
Other material	Zelus armillatus	(Lepeletier & Serville, 1825)	UCR_ENT 00030732	Reduviidae	Zelus	armillatus	ARGENTINA	Tucuman		San Pedro Colalao	-26.2333	-65.4833	1978-03-01	Unknown	Adult Female	USNM	G. Zhang	2012	Drake Colln.		Gazetteer	1057 m
Other material	Zelus armillatus	(Lepeletier & Serville, 1825)	UCR_ENT 00030733	Reduviidae	Zelus	armillatus	ARGENTINA	Tucuman		San Pedro Colalao	-26.2333	-65.4833	1979-03-01	Unknown	Adult Female	USNM	G. Zhang	2012	Drake Colln.		Gazetteer	1057 m
Other material	Zelus armillatus	(Lepeletier & Serville, 1825)	UCR_ENT 00030734	Reduviidae	Zelus	armillatus	ARGENTINA	Tucuman		San Pedro Colalao	-26.2333	-65.4833	1979-03-01	Unknown	Adult Female	USNM	G. Zhang	2012	Drake Colln.		Gazetteer	1057 m
Other material	Zelus armillatus	(Lepeletier & Serville, 1825)	UCR_ENT 00030735	Reduviidae	Zelus	armillatus	ARGENTINA	Tucuman		San Pedro Colalao	-26.2333	-65.4833	1979-03-01	Unknown	Adult Female	USNM	G. Zhang	2012	Drake Colln.		Gazetteer	1057 m
Other material	Zelus armillatus	(Lepeletier & Serville, 1825)	UCR_ENT 00030736	Reduviidae	Zelus	armillatus	ARGENTINA	Tucuman		San Pedro Colalao	-26.2333	-65.4833	1979-03-01	Unknown	Adult Female	USNM	G. Zhang	2012	Drake Colln.		Gazetteer	1057 m
Other material	Zelus armillatus	(Lepeletier & Serville, 1825)	UCR_ENT 00030737	Reduviidae	Zelus	armillatus	ARGENTINA	Tucuman		San Pedro Colalao	-26.2333	-65.4833	1979-03-01	Unknown	Adult Female	USNM	G. Zhang	2012	Drake Colln.		Gazetteer	1057 m
Other material	Zelus armillatus	(Lepeletier & Serville, 1825)	UCR_ENT 00030738	Reduviidae	Zelus	armillatus	ARGENTINA	Tucuman		San Pedro Colalao	-26.2333	-65.4833	1979-03-01	Unknown	Adult Female	USNM	G. Zhang	2012	Drake Colln.		Gazetteer	1057 m
Other material	Zelus armillatus	(Lepeletier & Serville, 1825)	UCR_ENT 00030739	Reduviidae	Zelus	armillatus	ARGENTINA	Tucuman		San Pedro Colalao	-26.2333	-65.4833	1979-03-01	Unknown	Adult Female	USNM	G. Zhang	2012	Drake Colln.		Gazetteer	1057 m
Other material	Zelus armillatus	(Lepeletier & Serville, 1825)	UCR_ENT 00030740	Reduviidae	Zelus	armillatus	ARGENTINA	Tucuman		San Pedro Colalao	-26.2333	-65.4833	1979-03-01	Unknown	Adult Female	USNM	G. Zhang	2012	Drake Colln.		Gazetteer	1057 m
Other material	Zelus armillatus	(Lepeletier & Serville, 1825)	UCR_ENT 00030741	Reduviidae	Zelus	armillatus	ARGENTINA	Tucuman		San Pedro Colalao	-26.2333	-65.4833	1979-03-01	Unknown	Adult Female	USNM	G. Zhang	2012	Drake Colln.		Gazetteer	1057 m
Other material	Zelus armillatus	(Lepeletier & Serville, 1825)	UCR_ENT 00030742	Reduviidae	Zelus	armillatus	ARGENTINA	Tucuman		Tucuman	-26.8167	-65.2167	1979-03-01	Unknown	Adult Female	USNM	G. Zhang	2012	Drake Colln.		Gazetteer
Other material	Zelus armillatus	(Lepeletier & Serville, 1825)	UCR_ENT 00030743	Reduviidae	Zelus	armillatus	ARGENTINA	Tucuman		San Pedro Colalao	-26.2333	-65.4833	1979-03-01	Unknown	Adult Female	USNM	G. Zhang	2012	Drake Colln.		Gazetteer	1057 m
Other material	Zelus armillatus	(Lepeletier & Serville, 1825)	UCR_ENT 00030744	Reduviidae	Zelus	armillatus	ARGENTINA	Tucuman		San Pedro Colalao	-26.2333	-65.4833	1979-03-01	Unknown	Adult Female	USNM	G. Zhang	2012	Drake Colln.		Gazetteer	1057 m
Other material	Zelus armillatus	(Lepeletier & Serville, 1825)	UCR_ENT 00030745	Reduviidae	Zelus	armillatus	ARGENTINA	Tucuman		San Pedro Colalao	-26.2333	-65.4833	1979-03-01	Unknown	Adult Female	USNM	G. Zhang	2012	Drake Colln.		Gazetteer	1057 m
Other material	Zelus armillatus	(Lepeletier & Serville, 1825)	UCR_ENT 00030746	Reduviidae	Zelus	armillatus	ARGENTINA	Tucuman		San Pedro Colalao	-26.2333	-65.4833	1979-03-01	Unknown	Adult Female	USNM	G. Zhang	2012	Drake Colln.		Gazetteer	1057 m
Other material	Zelus armillatus	(Lepeletier & Serville, 1825)	UCR_ENT 00030747	Reduviidae	Zelus	armillatus	ARGENTINA	Tucuman		San Pedro Colalao	-26.2333	-65.4833	1979-03-01	Unknown	Adult Female	USNM	G. Zhang	2012	Drake Colln.		Gazetteer	1057 m
Other material	Zelus armillatus	(Lepeletier & Serville, 1825)	UCR_ENT 00030748	Reduviidae	Zelus	armillatus	ARGENTINA	Tucuman		San Pedro Colalao	-26.2333	-65.4833	1979-03-01	Unknown	Adult Female	USNM	G. Zhang	2012	Drake Colln.		Gazetteer	1057 m
Other material	Zelus armillatus	(Lepeletier & Serville, 1825)	UCR_ENT 00030749	Reduviidae	Zelus	armillatus	ARGENTINA	Tucuman		San Pedro Colalao	-26.2333	-65.4833	1979-03-01	Unknown	Adult Female	USNM	G. Zhang	2012	Drake Colln.		Gazetteer	1057 m
Other material	Zelus armillatus	(Lepeletier & Serville, 1825)	UCR_ENT 00030750	Reduviidae	Zelus	armillatus	ARGENTINA	Tucuman		San Pedro Colalao	-26.2333	-65.4833	1979-03-01	Unknown	Adult Female	USNM	G. Zhang	2012	Drake Colln.		Gazetteer	1057 m
Other material	Zelus armillatus	(Lepeletier & Serville, 1825)	UCR_ENT 00030751	Reduviidae	Zelus	armillatus	ARGENTINA	Tucuman		Tucuman	-26.8167	-65.2167	1979-03-01	Unknown	Adult Male	USNM	G. Zhang	2012	Drake Colln.		Gazetteer
Other material	Zelus armillatus	(Lepeletier & Serville, 1825)	UCR_ENT 00030752	Reduviidae	Zelus	armillatus	ARGENTINA	Tucuman		San Pedro Colalao	-26.2333	-65.4833	1979-03-01	Unknown	Adult Male	USNM	G. Zhang	2012	Drake Colln.		Gazetteer	1057 m
Other material	Zelus armillatus	(Lepeletier & Serville, 1825)	UCR_ENT 00030753	Reduviidae	Zelus	armillatus	ARGENTINA	Tucuman		San Pedro Colalao	-26.2333	-65.4833	1979-03-01	Unknown	Adult Male	USNM	G. Zhang	2012	Drake Colln.		Gazetteer	1057 m
Other material	Zelus armillatus	(Lepeletier & Serville, 1825)	UCR_ENT 00030754	Reduviidae	Zelus	armillatus	ARGENTINA	Tucuman		San Pedro Colalao	-26.2333	-65.4833	1979-03-01	Unknown	Adult Male	USNM	G. Zhang	2012	Drake Colln.		Gazetteer	1057 m
Other material	Zelus armillatus	(Lepeletier & Serville, 1825)	UCR_ENT 00030755	Reduviidae	Zelus	armillatus	ARGENTINA	Tucuman		San Pedro Colalao	-26.2333	-65.4833	1979-03-01	Unknown	Adult Male	USNM	G. Zhang	2012	Drake Colln.		Gazetteer	1057 m
Other material	Zelus armillatus	(Lepeletier & Serville, 1825)	UCR_ENT 00030756	Reduviidae	Zelus	armillatus	ARGENTINA	Tucuman		San Pedro Colalao	-26.2333	-65.4833	1979-03-01	Unknown	Adult Male	USNM	G. Zhang	2012	Drake Colln.		Gazetteer	1057 m
Other material	Zelus armillatus	(Lepeletier & Serville, 1825)	UCR_ENT 00030757	Reduviidae	Zelus	armillatus	ARGENTINA	Tucuman		San Pedro Colalao	-26.2333	-65.4833	1979-03-01	Unknown	Adult Male	USNM	G. Zhang	2012	Drake Colln.		Gazetteer	1057 m
Other material	Zelus armillatus	(Lepeletier & Serville, 1825)	UCR_ENT 00030758	Reduviidae	Zelus	armillatus	ARGENTINA	Tucuman		San Pedro Colalao	-26.2333	-65.4833	1979-03-01	Unknown	Adult Male	USNM	G. Zhang	2012	Drake Colln.		Gazetteer	1057 m
Other material	Zelus armillatus	(Lepeletier & Serville, 1825)	UCR_ENT 00030759	Reduviidae	Zelus	armillatus	ARGENTINA	Tucuman		San Pedro Colalao	-26.2333	-65.4833	1979-03-01	Unknown	Adult Male	USNM	G. Zhang	2012	Drake Colln.		Gazetteer	1057 m
Other material	Zelus armillatus	(Lepeletier & Serville, 1825)	UCR_ENT 00030760	Reduviidae	Zelus	armillatus	ARGENTINA	Tucuman		San Pedro Colalao	-26.2333	-65.4833	1979-03-01	Unknown	Adult Male	USNM	G. Zhang	2012	Drake Colln.		Gazetteer	1057 m
Other material	Zelus armillatus	(Lepeletier & Serville, 1825)	UCR_ENT 00030761	Reduviidae	Zelus	armillatus	ARGENTINA	Tucuman		San Pedro Colalao	-26.2333	-65.4833	1979-03-01	Unknown	Adult Male	USNM	G. Zhang	2012	Drake Colln.		Gazetteer	1057 m
Other material	Zelus armillatus	(Lepeletier & Serville, 1825)	UCR_ENT 00030762	Reduviidae	Zelus	armillatus	ARGENTINA	Tucuman		San Pedro Colalao	-26.2333	-65.4833	1979-03-01	Unknown	Adult Male	USNM	G. Zhang	2012	Drake Colln.		Gazetteer	1057 m
Other material	Zelus armillatus	(Lepeletier & Serville, 1825)	UCR_ENT 00030763	Reduviidae	Zelus	armillatus	ARGENTINA	Tucuman		San Pedro Colalao	-26.2333	-65.4833	1979-03-01	Unknown	Adult Male	USNM	G. Zhang	2012	Drake Colln.		Gazetteer	1057 m
Other material	Zelus armillatus	(Lepeletier & Serville, 1825)	UCR_ENT 00030764	Reduviidae	Zelus	armillatus	ARGENTINA	Tucuman		San Pedro Colalao	-26.2333	-65.4833	1979-03-01	Unknown	Adult Male	USNM	G. Zhang	2012	Drake Colln.		Gazetteer	1057 m
Other material	Zelus armillatus	(Lepeletier & Serville, 1825)	UCR_ENT 00030765	Reduviidae	Zelus	armillatus	ARGENTINA	Tucuman		San Pedro Colalao	-26.2333	-65.4833	1979-03-01	Unknown	Adult Male	USNM	G. Zhang	2012	Drake Colln.		Gazetteer	1057 m
Other material	Zelus armillatus	(Lepeletier & Serville, 1825)	UCR_ENT 00030792	Reduviidae	Zelus	armillatus	ARGENTINA	Tucuman		San Pedro Colalao	-26.2333	-65.4833	1979-03-01	Unknown	Adult Male	USNM	G. Zhang	2012	Drake Colln.		Gazetteer	1057 m
Other material	Zelus armillatus	(Lepeletier & Serville, 1825)	UCR_ENT 00030793	Reduviidae	Zelus	armillatus	ARGENTINA	Tucuman		San Pedro Colalao	-26.2333	-65.4833	1979-03-01	Unknown	Adult Male	USNM	G. Zhang	2012	Drake Colln.		Gazetteer	1057 m
Other material	Zelus armillatus	(Lepeletier & Serville, 1825)	UCR_ENT 00030794	Reduviidae	Zelus	armillatus	ARGENTINA	Tucuman		San Pedro Colalao	-26.2333	-65.4833	1979-03-01	Unknown	Adult Male	USNM	G. Zhang	2012	Drake Colln.		Gazetteer	1057 m
Other material	Zelus armillatus	(Lepeletier & Serville, 1825)	UCR_ENT 00030795	Reduviidae	Zelus	armillatus	ARGENTINA	Salta		Campo Alegre			1992-02-23	L. E. Peña	Adult Male	USNM	G. Zhang	2012	Drake Colln.
Other material	Zelus armillatus	(Lepeletier & Serville, 1825)	UCR_ENT 00030796	Reduviidae	Zelus	armillatus	ARGENTINA	Salta		Campo Alegre			1992-02-23	L. Pena G.	Adult Male	USNM	G. Zhang	2012	Drake Colln.
Other material	Zelus armillatus	(Lepeletier & Serville, 1825)	UCR_ENT 00030797	Reduviidae	Zelus	armillatus	ARGENTINA	Salta		Campo Alegre			1992-02-23	L. Pena G.	Adult Male	USNM	G. Zhang	2012	Drake Colln.
Other material	Zelus armillatus	(Lepeletier & Serville, 1825)	UCR_ENT 00030798	Reduviidae	Zelus	armillatus	ARGENTINA	Salta		Campo Alegre			1992-02-23	L. Pena G.	Adult Male	USNM	G. Zhang	2012	Drake Colln.
Other material	Zelus armillatus	(Lepeletier & Serville, 1825)	UCR_ENT 00030799	Reduviidae	Zelus	armillatus	ARGENTINA	Salta		Campo Alegre			1992-02-23	L. Pena G.	Adult Male	USNM	G. Zhang	2012	Drake Colln.
Other material	Zelus armillatus	(Lepeletier & Serville, 1825)	UCR_ENT 00030800	Reduviidae	Zelus	armillatus	ARGENTINA	Salta		Campo Alegre			1992-02-23	L. Pena G.	Adult Male	USNM	G. Zhang	2012	Drake Colln.
Other material	Zelus armillatus	(Lepeletier & Serville, 1825)	UCR_ENT 00030801	Reduviidae	Zelus	armillatus	ARGENTINA	Salta		Campo Alegre			1992-02-23	L. Pena G.	Adult Male	USNM	G. Zhang	2012	Drake Colln.
Other material	Zelus armillatus	(Lepeletier & Serville, 1825)	UCR_ENT 00030802	Reduviidae	Zelus	armillatus	ARGENTINA	Salta		Campo Alegre			1992-02-23	L. Pena G.	Adult Male	USNM	G. Zhang	2012	Drake Colln.
Other material	Zelus armillatus	(Lepeletier & Serville, 1825)	UCR_ENT 00030803	Reduviidae	Zelus	armillatus	ARGENTINA	Salta		Campo Alegre			1992-02-23	L. Pena G.	Adult Male	USNM	G. Zhang	2012	Drake Colln.
Other material	Zelus armillatus	(Lepeletier & Serville, 1825)	UCR_ENT 00030804	Reduviidae	Zelus	armillatus	ARGENTINA	Salta		Campo Alegre			1992-02-23	L. Pena G.	Adult Male	USNM	G. Zhang	2012	Drake Colln.
Other material	Zelus armillatus	(Lepeletier & Serville, 1825)	UCR_ENT 00030805	Reduviidae	Zelus	armillatus	ARGENTINA	Salta		Campo Alegre			1992-02-23	L. Pena G.	Adult Male	USNM	G. Zhang	2012	Drake Colln.
Other material	Zelus armillatus	(Lepeletier & Serville, 1825)	UCR_ENT 00030806	Reduviidae	Zelus	armillatus	ARGENTINA	Salta		Campo Alegre			1992-02-23	L. Pena G.	Adult Male	USNM	G. Zhang	2012	Drake Colln.
Other material	Zelus armillatus	(Lepeletier & Serville, 1825)	UCR_ENT 00030807	Reduviidae	Zelus	armillatus	ARGENTINA	Salta		Campo Alegre			1992-02-23	L. Pena G.	Adult Male	USNM	G. Zhang	2012	Drake Colln.
Other material	Zelus armillatus	(Lepeletier & Serville, 1825)	UCR_ENT 00030808	Reduviidae	Zelus	armillatus	ARGENTINA	Salta		Campo Alegre			1992-02-23	L. Pena G.	Adult Male	USNM	G. Zhang	2012	Drake Colln.
Other material	Zelus armillatus	(Lepeletier & Serville, 1825)	UCR_ENT 00030809	Reduviidae	Zelus	armillatus	ARGENTINA	Salta		Jujuy			1992-02-21	L.E. Peña	Adult Male	USNM	G. Zhang	2012	Drake Colln.			1350 m
Other material	Zelus armillatus	(Lepeletier & Serville, 1825)	UCR_ENT 00030810	Reduviidae	Zelus	armillatus	ARGENTINA	Salta		Jujuy			1992-02-21	L.E. Peña	Adult Male	USNM	G. Zhang	2012	Drake Colln.			1350 m
Other material	Zelus armillatus	(Lepeletier & Serville, 1825)	UCR_ENT 00030811	Reduviidae	Zelus	armillatus	ARGENTINA	Salta		La Caldera	-24.6	-65.3833	1983-02-01	Unknown	Adult Male	USNM	G. Zhang	2012	Drake Colln.		Gazetteer	1422 m
Other material	Zelus armillatus	(Lepeletier & Serville, 1825)	UCR_ENT 00030812	Reduviidae	Zelus	armillatus	ARGENTINA	Salta		Campo Alegre			1992-02-23	L. E. Peña	Adult Male	USNM	G. Zhang	2012	Drake Colln.
Other material	Zelus armillatus	(Lepeletier & Serville, 1825)	UCR_ENT 00030813	Reduviidae	Zelus	armillatus	ARGENTINA	Salta		Campo Alegre			1992-02-23	L. E. Peña	Adult Male	USNM	G. Zhang	2012	Drake Colln.
Other material	Zelus armillatus	(Lepeletier & Serville, 1825)	UCR_ENT 00030814	Reduviidae	Zelus	armillatus	ARGENTINA	Salta		Campo Alegre			1992-02-23	L. E. Peña	Adult Male	USNM	G. Zhang	2012	Drake Colln.
Other material	Zelus armillatus	(Lepeletier & Serville, 1825)	UCR_ENT 00030815	Reduviidae	Zelus	armillatus	ARGENTINA	Salta		Alemania	-25.6	-65.6333	1992-02-22	L. E. Peña	Adult Male	USNM	G. Zhang	2012	Drake Colln.		GeoLocate Software
Other material	Zelus armillatus	(Lepeletier & Serville, 1825)	UCR_ENT 00030816	Reduviidae	Zelus	armillatus	ARGENTINA	Salta		Campo Alegre			1992-02-23	L. E. Peña	Adult Male	USNM	G. Zhang	2012	Drake Colln.
Other material	Zelus armillatus	(Lepeletier & Serville, 1825)	UCR_ENT 00030817	Reduviidae	Zelus	armillatus	ARGENTINA	Salta		La Caldera	-24.6	-65.3833	1983-02-01	Unknown	Adult Male	USNM	G. Zhang	2012	Drake Colln.		Gazetteer	1422 m
Other material	Zelus armillatus	(Lepeletier & Serville, 1825)	UCR_ENT 00030818	Reduviidae	Zelus	armillatus	ARGENTINA	Salta		La Caldera	-24.6	-65.3833	1983-02-01	Unknown	Adult Male	USNM	G. Zhang	2012	Drake Colln.		Gazetteer	1422 m
Other material	Zelus armillatus	(Lepeletier & Serville, 1825)	UCR_ENT 00030820	Reduviidae	Zelus	armillatus	BOLIVIA	La Paz		Tres Esteros, Guanay	-15.4833	-67.8833	1989-08-19 to 1989-08-25	L. Pena	Adult Male	USNM	G. Zhang	2012	Drake Colln.
Other material	Zelus armillatus	(Lepeletier & Serville, 1825)	UCR_ENT 00030821	Reduviidae	Zelus	armillatus	ARGENTINA	Entre Rios		Liebig	-32.1352	-58.2378	1987-12-01	Unknown	Adult Male	USNM	G. Zhang	2012	Drake Colln.		GeoLocate Software
Other material	Zelus armillatus	(Lepeletier & Serville, 1825)	UCR_ENT 00031498	Reduviidae	Zelus	armillatus	VENEZUELA	Bolivar		Palua	8.35121	-62.6692	1972-10-30 to 1972-10-31	K. deWit	Adult Female	ZMAN	G. Zhang	2012			Gazetteer
Other material	Zelus armillatus	(Lepeletier & Serville, 1825)	UCR_ENT 00037567	Reduviidae	Zelus	armillatus	COLOMBIA	Antioquia		Titiribi	6.0656	-75.7972	1972-06-01	R. Velez	Adult Female	MEFLG	G. Zhang	2012			Gazetteer
Other material	Zelus armillatus	(Lepeletier & Serville, 1825)	UCR_ENT 00038393	Reduviidae	Zelus	armillatus	TRINIDAD AND TOBAGO	Trinidad		Regional Virus Laboratory, Port-of-Spain	10.664	-61.5168	1957-01-10	B. W. I.	Adult Female	UCB	G. Zhang	2012			Google Earth
Other material	Zelus armillatus	(Lepeletier & Serville, 1825)	UCR_ENT 00038931	Reduviidae	Zelus	armillatus	BRAZIL	Minas Gerais		Lassance	-17.9	-44.5667	1919-11-09 to 1919-11-19	Unknown	Adult Male	CUIC	G. Zhang	2012			Gazetteer
Other material	Zelus armillatus	(Lepeletier & Serville, 1825)	UCR_ENT 00038932	Reduviidae	Zelus	armillatus	BRAZIL	unknown		unknown			no date provided	Cornell University	Adult Male	CUIC	G. Zhang	2012
Other material	Zelus armillatus	(Lepeletier & Serville, 1825)	UCR_ENT 00038933	Reduviidae	Zelus	armillatus	ARGENTINA	Cordoba		Cosquin, Sierra de Cordoba	-31.4389	-64.8345	1920-03-01 to 1920-03-09	Cornell Univ. Biological Expedition	Adult Male	CUIC	G. Zhang	2012			Google Earth
Other material	Zelus armillatus	(Lepeletier & Serville, 1825)	UCR_ENT 00038935	Reduviidae	Zelus	armillatus	PARAGUAY	Sapucay		Unknown			no date provided	Heidemann	Adult Male	CUIC	G. Zhang	2012
Other material	Zelus armillatus	(Lepeletier & Serville, 1825)	UCR_ENT 00038943	Reduviidae	Zelus	armillatus	BRAZIL	unknown		unknown			no date provided	Cornell University	Adult Female	CUIC	G. Zhang	2012
Other material	Zelus armillatus	(Lepeletier & Serville, 1825)	UCR_ENT 00038948	Reduviidae	Zelus	armillatus	BRAZIL	Minas Gerais		Firapora, MinasGeraea	-17.35	-44.9333	1919-11-11 to 1919-11-13	R.G. Harris	Adult Female	CUIC	G. Zhang	2012			Gazetteer
Other material	Zelus armillatus	(Lepeletier & Serville, 1825)	UCR_ENT 00038949	Reduviidae	Zelus	armillatus	VENEZUELA	Monagas		Quiriquire	9.96535	-63.2177	no date provided	Helen K.Hodson	Adult Female	CUIC	G. Zhang	2012			Google Earth
Other material	Zelus armillatus	(Lepeletier & Serville, 1825)	UCR_ENT 00040127	Reduviidae	Zelus	armillatus	PERU	Huanuco	Leoncio Prado	Tingo Maria	-9.32049	-76.0051	no date provided	Weyrauch	Adult Male	TAMU	G. Zhang	2012			Google Earth	620 m
Other material	Zelus armillatus	(Lepeletier & Serville, 1825)	UCR_ENT 00040128	Reduviidae	Zelus	armillatus	PERU	Huanuco	Leoncio Prado	Tingo Maria	-9.32049	-76.0051	no date provided	Weyrauch	Adult Male	TAMU	G. Zhang	2012			Google Earth	620 m
Other material	Zelus armillatus	(Lepeletier & Serville, 1825)	UCR_ENT 00040129	Reduviidae	Zelus	armillatus	PERU	Huanuco	Leoncio Prado	Tingo Maria	-9.3	-75.9833	no date provided	Weyrauch	Adult Male	TAMU	G. Zhang	2012				671 m
Other material	Zelus armillatus	(Lepeletier & Serville, 1825)	UCR_ENT 00040132	Reduviidae	Zelus	armillatus	PERU	Huanuco	Leoncio Prado	Tingo Maria	-9.3	-75.9833	no date provided	Unknown	Adult Male	TAMU	G. Zhang	2012				671 m
Other material	Zelus armillatus	(Lepeletier & Serville, 1825)	UCR_ENT 00040133	Reduviidae	Zelus	armillatus	BOLIVIA	Cochabamba		Chapare	-16.711	-65.663	no date provided	Zischka	Adult Male	TAMU	G. Zhang	2012			Google Earth
Other material	Zelus armillatus	(Lepeletier & Serville, 1825)	UCR_ENT 00040134	Reduviidae	Zelus	armillatus	COLOMBIA	Meta		Selva de la Cuya, Cano Grande			1944-02-14	Unknown	Adult Male	TAMU	G. Zhang	2012				500 m
Other material	Zelus armillatus	(Lepeletier & Serville, 1825)	UCR_ENT 00040135	Reduviidae	Zelus	armillatus	PERU	Huanuco		Turista Hotel, Tingo Maria	-9.3	-76	1987-04-11 to 1987-04-17	J. E. Eger	Adult Male	TAMU	G. Zhang	2012			Google Earth	762 m
Other material	Zelus armillatus	(Lepeletier & Serville, 1825)	UCR_ENT 00040153	Reduviidae	Zelus	armillatus	COLOMBIA	Cundinamarca		Cacheda			1943-10-27	Richter	Adult Female	TAMU	G. Zhang	2012				1800 m
Other material	Zelus armillatus	(Lepeletier & Serville, 1825)	UCR_ENT 00040154	Reduviidae	Zelus	armillatus	COLOMBIA	Meta		Selva de la Cuya, Cano Grande			1944-02-18	Uyjed	Adult Female	TAMU	G. Zhang	2012				500 m
Other material	Zelus armillatus	(Lepeletier & Serville, 1825)	UCR_ENT 00040155	Reduviidae	Zelus	armillatus	BRAZIL	Sao Paulo		Marilia	-22.2167	-49.9333	1948-10-01	Dr. Nick	Adult Female	TAMU	G. Zhang	2012			Gazetteer	609 m
Other material	Zelus armillatus	(Lepeletier & Serville, 1825)	UCR_ENT 00040156	Reduviidae	Zelus	armillatus	VENEZUELA	Distrito Federal		Berg Avila, Caracas	10.488	-66.8792	no date provided	P. Cor. Vogl	Adult Female	TAMU	G. Zhang	2012			Gazetteer
Other material	Zelus armillatus	(Lepeletier & Serville, 1825)	UCR_ENT 00040157	Reduviidae	Zelus	armillatus	PERU	Huanuco	Leoncio Prado	Tingo Maria	-9.32049	-76.0051	1947-03-01	Weyrauch	Adult Female	TAMU	G. Zhang	2012			Google Earth	620 m
Other material	Zelus armillatus	(Lepeletier & Serville, 1825)	UCR_ENT 00040158	Reduviidae	Zelus	armillatus	PERU	Huanuco	Leoncio Prado	Tingo Maria	-9.32049	-76.0051	1942-09-15	Weyrauch	Adult Female	TAMU	G. Zhang	2012			Google Earth	620 m
Other material	Zelus armillatus	(Lepeletier & Serville, 1825)	UCR_ENT 00040159	Reduviidae	Zelus	armillatus	PERU	Huanuco	Leoncio Prado	Tingo Maria	-9.3	-75.9833	1947-08-01	Weyrauch	Adult Female	TAMU	G. Zhang	2012				671 m
Other material	Zelus armillatus	(Lepeletier & Serville, 1825)	UCR_ENT 00040160	Reduviidae	Zelus	armillatus	PERU	Huanuco	Leoncio Prado	Tingo Maria	-9.3	-75.9833	1947-02-01	Weyrauch	Adult Female	TAMU	G. Zhang	2012				671 m
Other material	Zelus armillatus	(Lepeletier & Serville, 1825)	UCR_ENT 00040506	Reduviidae	Zelus	armillatus	BOLIVIA	Chapare		Unknown			no date provided	Unknown	Adult Male	TAMU	G. Zhang	2012	Label practically illegible, collector name: Zi...
Other material	Zelus armillatus	(Lepeletier & Serville, 1825)	UCR_ENT 00040507	Reduviidae	Zelus	armillatus	PERU	Huanuco	Leoncio Prado	Tingo Maria	-9.3	-75.9833	1947-02-15	Weyrauch	Adult sex unknown	TAMU	G. Zhang	2012				671 m
Other material	Zelus armillatus	(Lepeletier & Serville, 1825)	UCR_ENT 00040508	Reduviidae	Zelus	armillatus	BRAZIL	unknown		unknown			no date provided	Unknown	Adult Female	TAMU	G. Zhang	2012
Other material	Zelus armillatus	(Lepeletier & Serville, 1825)	UCR_ENT 00040510	Reduviidae	Zelus	armillatus	BRAZIL	Pernambuco		Recife	-8.05	-34.9	1935-07-26	J. Bar	Adult Female	TAMU	G. Zhang	2012			Gazetteer
Other material	Zelus armillatus	(Lepeletier & Serville, 1825)	UCR_ENT 00040511	Reduviidae	Zelus	armillatus	UNKNOWN	unknown		Tisuka			1891-08-24	Unknown	Adult Female	TAMU	G. Zhang	2012
Other material	Zelus armillatus	(Lepeletier & Serville, 1825)	UCR_ENT 00042033	Reduviidae	Zelus	armillatus	UNKNOWN	unknown		Unknown			no date provided	Unknown	Adult Male	ZSM	G. Zhang	2012	Primary label reads South America?
Other material	Zelus armillatus	(Lepeletier & Serville, 1825)	UCR_ENT 00042034	Reduviidae	Zelus	armillatus	UNKNOWN	unknown		Unknown			no date provided	Unknown	Adult Male	ZSM	G. Zhang	2012	Primary label reads: Arilus anticus fig. 80g
Other material	Zelus armillatus	(Lepeletier & Serville, 1825)	UCR_ENT 00042035	Reduviidae	Zelus	armillatus	PARAGUAY	Guaira		Independencia	-25.6948	-56.2596	no date provided	Unknown	Adult Male	ZSM	G. Zhang	2012			Google Earth
Other material	Zelus armillatus	(Lepeletier & Serville, 1825)	UCR_ENT 00042036	Reduviidae	Zelus	armillatus	PARAGUAY	Guaira		Independencia	-25.6948	-56.2596	no date provided	Unknown	Adult Male	ZSM	G. Zhang	2012			Google Earth
Other material	Zelus armillatus	(Lepeletier & Serville, 1825)	UCR_ENT 00042037	Reduviidae	Zelus	armillatus	ARGENTINA	Salta		Salta	-24.7833	-65.4167	1942-09-04	Unknown	Adult Male	ZSM	G. Zhang	2012			Gazetteer	1183 m
Other material	Zelus armillatus	(Lepeletier & Serville, 1825)	UCR_ENT 00042038	Reduviidae	Zelus	armillatus	BOLIVIA	La Paz		Region Capare	-16.6667	-68.4333	1948-11-06	Zischka	Adult Male	ZSM	G. Zhang	2012			Gazetteer	400 m
Other material	Zelus armillatus	(Lepeletier & Serville, 1825)	UCR_ENT 00042039	Reduviidae	Zelus	armillatus	BRAZIL	unknown		unknown			no date provided	Unknown	Adult Female	ZSM	G. Zhang	2012
Other material	Zelus armillatus	(Lepeletier & Serville, 1825)	UCR_ENT 00042040	Reduviidae	Zelus	armillatus	BRAZIL	unknown		unknown			no date provided	Unknown	Adult Female	ZSM	G. Zhang	2012
Other material	Zelus armillatus	(Lepeletier & Serville, 1825)	UCR_ENT 00042041	Reduviidae	Zelus	armillatus	PARAGUAY	Guaira		Independencia	-25.6948	-56.2596	1939-02-14	Unknown	Adult Female	ZSM	G. Zhang	2012			Google Earth
Other material	Zelus armillatus	(Lepeletier & Serville, 1825)	UCR_ENT 00042043	Reduviidae	Zelus	armillatus	BOLIVIA	La Paz		Region Capare	-16.6667	-68.4333	1950-10-05	Zischka	Adult Female	ZSM	G. Zhang	2012			Gazetteer	400 m
Other material	Zelus armillatus	(Lepeletier & Serville, 1825)	UCR_ENT 00042044	Reduviidae	Zelus	armillatus	PARAGUAY	Itapua		Hohenau	-27.0833	-55.75	no date provided	Unknown	Adult Female	ZSM	G. Zhang	2012			Gazetteer
Other material	Zelus armillatus	(Lepeletier & Serville, 1825)	UCR_ENT 00042045	Reduviidae	Zelus	armillatus	UNKNOWN	unknown		Unknown			no date provided	Unknown	Adult Female	ZSM	G. Zhang	2012	Primary label reads South America?
Other material	Zelus armillatus	(Lepeletier & Serville, 1825)	UCR_ENT 00042046	Reduviidae	Zelus	armillatus	BRAZIL	Rio Grande do Sul		Porto Alegre	-30.0333	-51.2	1954-11-01	Huedepohl	Adult Female	ZSM	G. Zhang	2012			Gazetteer
Other material	Zelus armillatus	(Lepeletier & Serville, 1825)	UCR_ENT 00042047	Reduviidae	Zelus	armillatus	BOLIVIA	Santa Cruz		Samaipata	-18.15	-63.87	1959-02-25	Zischka	Adult Female	ZSM	G. Zhang	2012			Gazetteer	1600 m
Other material	Zelus armillatus	(Lepeletier & Serville, 1825)	UCR_ENT 00042048	Reduviidae	Zelus	armillatus	BRAZIL	unknown		unknown			no date provided	Unknown	Adult Female	ZSM	G. Zhang	2012
Other material	Zelus armillatus	(Lepeletier & Serville, 1825)	UCR_ENT 00042918	Reduviidae	Zelus	armillatus	BRAZIL	Minas Gerais		Lavras	-21.2457	-44.9998	1979-03-22	W.D. Fronk	Adult Male	CSUC	G. Zhang	2012			Google Earth
Other material	Zelus armillatus	(Lepeletier & Serville, 1825)	UCR_ENT 00042919	Reduviidae	Zelus	armillatus	BRAZIL	Minas Gerais		Lavras	-21.2457	-44.9998	1979-03-22	W.D. Fronk	Adult Male	CSUC	G. Zhang	2012			Google Earth
Other material	Zelus armillatus	(Lepeletier & Serville, 1825)	UCR_ENT 00042920	Reduviidae	Zelus	armillatus	BRAZIL	Minas Gerais		Lavras	-21.2457	-44.9998	1979-04-27	W.D. Fronk	Adult Male	CSUC	G. Zhang	2012			Google Earth
Other material	Zelus armillatus	(Lepeletier & Serville, 1825)	UCR_ENT 00042921	Reduviidae	Zelus	armillatus	BRAZIL	Minas Gerais		Lavras	-21.2457	-44.9998	1979-04-27	W.D. Fronk	Adult Female	CSUC	G. Zhang	2012			Google Earth
Other material	Zelus armillatus	(Lepeletier & Serville, 1825)	UCR_ENT 00042922	Reduviidae	Zelus	armillatus	BRAZIL	Minas Gerais		Lavras	-21.2457	-44.9998	1979-03-22	W.D. Fronk	Adult Female	CSUC	G. Zhang	2012			Google Earth
Other material	Zelus armillatus	(Lepeletier & Serville, 1825)	UCR_ENT 00042923	Reduviidae	Zelus	armillatus	BRAZIL	Minas Gerais		Lavras	-21.2457	-44.9998	1979-03-22	W.D. Fronk	Adult Female	CSUC	G. Zhang	2012			Google Earth
Other material	Zelus armillatus	(Lepeletier & Serville, 1825)	UCR_ENT 00042924	Reduviidae	Zelus	armillatus	BRAZIL	Minas Gerais		Lavras	-21.2457	-44.9998	1979-03-29	W.D. Fronk	Adult Female	CSUC	G. Zhang	2012			Google Earth
Other material	Zelus armillatus	(Lepeletier & Serville, 1825)	UCR_ENT 00046027	Reduviidae	Zelus	armillatus	COLOMBIA	Cundinamarca		Pandi	4.19444	-74.4972	1995-11-12	T. Corredor	Adult Male	UNAB	G. Zhang	2012			Label	1024 m
Other material	Zelus armillatus	(Lepeletier & Serville, 1825)	UCR_ENT 00046028	Reduviidae	Zelus	armillatus	COLOMBIA	Meta		Villavicencio	4.15	-73.65	1974-07-20	G. Torres	Adult Female	UNAB	G. Zhang	2012			Label	467 m
Other material	Zelus armillatus	(Lepeletier & Serville, 1825)	UCR_ENT 00046029	Reduviidae	Zelus	armillatus	COLOMBIA	Meta		Villavicencio	4.15	-73.65	2004-08-14	J. Cuspoca	Adult Female	UNAB	G. Zhang	2012			Label	467 m
Other material	Zelus armillatus	(Lepeletier & Serville, 1825)	UCR_ENT 00046030	Reduviidae	Zelus	armillatus	COLOMBIA	Cundinamarca		Sasaima	4.96638	-76.4375	1989-09-10	C. Berrio	Adult Female	UNAB	G. Zhang	2012			Label	1221 m
Other material	Zelus armillatus	(Lepeletier & Serville, 1825)	UCR_ENT 00046031	Reduviidae	Zelus	armillatus	COLOMBIA	Santander		Mogotes	6.47611	-75.9747	1975-06-24	N. Lombana	Adult Female	UNAB	G. Zhang	2012			Label	1700 m
Other material	Zelus armillatus	(Lepeletier & Serville, 1825)	UCR_ENT 00046033	Reduviidae	Zelus	armillatus	COLOMBIA	Meta		Villavicencio	4.15	-73.65	1974-08-15	G. Torres	Juvenile sex unknown	UNAB	G. Zhang	2012			Label	467 m
Other material	Zelus armillatus	(Lepeletier & Serville, 1825)	UCR_ENT 00047095	Reduviidae	Zelus	armillatus	ECUADOR	Pastaza		Cuisimi, on Rio Cuisimi 150 km SE of Puyo	-2.43129	-77.0329	1971-05-15 to 1971-05-31	B. Malkin	Adult Male	AMNH	G. Zhang	2012			Google Earth	350 m
Other material	Zelus armillatus	(Lepeletier & Serville, 1825)	UCR_ENT 00047097	Reduviidae	Zelus	armillatus	PARAGUAY	Paraguari		Villarrica	-25.75	-56.5	October	F.Schade	Adult Male	AMNH	G. Zhang	2012			GeoLocate Software
Other material	Zelus armillatus	(Lepeletier & Serville, 1825)	UCR_ENT 00047098	Reduviidae	Zelus	armillatus	PARAGUAY	Guaira		Carlos Pfanel	-25.65	-56.2333	1951-02-15	Fowler	Adult Male	AMNH	G. Zhang	2012			Gazetteer
Other material	Zelus armillatus	(Lepeletier & Serville, 1825)	UCR_ENT 00047099	Reduviidae	Zelus	armillatus	ARGENTINA	Tucuman		800 m. of Raco			1950-04-04	Wygodzinsky	Adult Male	AMNH	G. Zhang	2012
Other material	Zelus armillatus	(Lepeletier & Serville, 1825)	UCR_ENT 00047101	Reduviidae	Zelus	armillatus	ARGENTINA	Tucuman		Tucuman	-26.8167	-65.2167	1950-04-04	Wygodzinsky	Adult Female	AMNH	G. Zhang	2012			Gazetteer
Other material	Zelus armillatus	(Lepeletier & Serville, 1825)	UCR_ENT 00047102	Reduviidae	Zelus	armillatus	ECUADOR	Pastaza		Cuisimi, on Rio Cuisimi 150 km SE of Puyo	-2.43129	-77.0329	1971-05-15 to 1971-05-31	B. Malkin	Adult Female	AMNH	G. Zhang	2012			Google Earth	350 m
Other material	Zelus armillatus	(Lepeletier & Serville, 1825)	UCR_ENT 00047103	Reduviidae	Zelus	armillatus	ECUADOR	Pastaza		Cuisimi, on Rio Cuisimi 150 km SE of Puyo	-2.43129	-77.0329	1971-05-15 to 1971-05-31	B. Malkin	Adult Female	AMNH	G. Zhang	2012			Google Earth	350 m
Other material	Zelus armillatus	(Lepeletier & Serville, 1825)	UCR_ENT 00047104	Reduviidae	Zelus	armillatus	ECUADOR	Pastaza		Cuisimi, on Rio Cuisimi 150 km SE of Puyo	-2.43129	-77.0329	1971-05-15 to 1971-05-31	B. Malkin	Adult Female	AMNH	G. Zhang	2012			Google Earth	350 m
Other material	Zelus armillatus	(Lepeletier & Serville, 1825)	UCR_ENT 00047105	Reduviidae	Zelus	armillatus	PARAGUAY	Paraguari		Villarrica	-25.75	-56.5	no date provided	F.Schade	Adult Female	AMNH	G. Zhang	2012			GeoLocate Software
Other material	Zelus armillatus	(Lepeletier & Serville, 1825)	UCR_ENT 00047110	Reduviidae	Zelus	armillatus	BOLIVIA	Cochabamba		Rio Cristal Mavu 50 m NE of Cochabamba	-16.8703	-65.6304	1949-10-06	L.Pena	Adult Female	AMNH	G. Zhang	2012			Google Earth
Other material	Zelus armillatus	(Lepeletier & Serville, 1825)	UCR_ENT 00047112	Reduviidae	Zelus	armillatus	BRAZIL	Parana		R. Parana, Porto Cabral	-13.876	-47.6539	1949-03-01	A. Maller	Adult Female	AMNH	G. Zhang	2012			Google Earth
Other material	Zelus armillatus	(Lepeletier & Serville, 1825)	UCR_ENT 00047113	Reduviidae	Zelus	armillatus	BRAZIL	Parana		Caviuna	-23.2	-51.3667	1947-04-01	A.Maller	Adult Female	AMNH	G. Zhang	2012			GeoLocate Software
Other material	Zelus armillatus	(Lepeletier & Serville, 1825)	UCR_ENT 00047114	Reduviidae	Zelus	armillatus	BRAZIL	Parana		Caviuna	-23.2	-51.3667	1945-12-01	A.Maller	Adult Female	AMNH	G. Zhang	2012			GeoLocate Software
Other material	Zelus armillatus	(Lepeletier & Serville, 1825)	UCR_ENT 00047115	Reduviidae	Zelus	armillatus	BRAZIL	Parana		Caviuna	-23.2	-51.3667	1947-03-01	A.Maller	Adult Female	AMNH	G. Zhang	2012			GeoLocate Software
Other material	Zelus armillatus	(Lepeletier & Serville, 1825)	UCR_ENT 00047116	Reduviidae	Zelus	armillatus	BRAZIL	Parana		Caviuna	-23.2	-51.3667	1945-04-01	A.Maller	Adult Female	AMNH	G. Zhang	2012			GeoLocate Software
Other material	Zelus armillatus	(Lepeletier & Serville, 1825)	UCR_ENT 00047116	Reduviidae	Zelus	armillatus	BRAZIL	Parana		Caviuna	-23.2	-51.3667	1945-04-01	A.Maller	Adult Female	AMNH	G. Zhang	2012			GeoLocate Software
Other material	Zelus armillatus	(Lepeletier & Serville, 1825)	UCR_ENT 00047117	Reduviidae	Zelus	armillatus	BRAZIL	Parana		Caviuna	-23.2	-51.3667	1945-12-01	A.Maller	Adult Female	AMNH	G. Zhang	2012			GeoLocate Software
Other material	Zelus armillatus	(Lepeletier & Serville, 1825)	UCR_ENT 00047118	Reduviidae	Zelus	armillatus	BRAZIL	Goias		Jatai	-17.8757	-51.7216	1972-11-01	F.M. Oliveira	Adult Female	AMNH	G. Zhang	2012			GeoLocate Software
Other material	Zelus armillatus	(Lepeletier & Serville, 1825)	UCR_ENT 00047119	Reduviidae	Zelus	armillatus	BRAZIL	Amapa		Villa Amazonas	0.03333	-51.05	1942-02-11 to 1942-03-01	August Rabaut	Adult Female	AMNH	G. Zhang	2012
Other material	Zelus armillatus	(Lepeletier & Serville, 1825)	UCR_ENT 00047435	Reduviidae	Zelus	armillatus	UNKNOWN	unknown		Unknown			no date provided	Unknown	Adult Female	AMNH	G. Zhang	2012	Additional Label Reads: Braziliensis
Other material	Zelus armillatus	(Lepeletier & Serville, 1825)	UCR_ENT 00047615	Reduviidae	Zelus	armillatus	ARGENTINA	Salta		Cafayate	-26.0841	-65.975	1951-02-01	Hayward	Adult Male	AMNH	G. Zhang	2012			GeoLocate Software
Other material	Zelus armillatus	(Lepeletier & Serville, 1825)	UCR_ENT 00047616	Reduviidae	Zelus	armillatus	ARGENTINA	Salta		Cafayate	-26.0841	-65.975	1951-02-01	Hayward	Adult Female	AMNH	G. Zhang	2012			GeoLocate Software
Other material	Zelus armillatus	(Lepeletier & Serville, 1825)	UCR_ENT 00047617	Reduviidae	Zelus	armillatus	BRAZIL	Amazonas		Teffe	-3.3667	-64.7	no date provided	Raulin. Thayer Expedition	Adult Female	AMNH	G. Zhang	2012
Other material	Zelus armillatus	(Lepeletier & Serville, 1825)	UCR_ENT 00047618	Reduviidae	Zelus	armillatus	VENEZUELA	unknown		Venezuela			1700-08-17	Pomerat	Adult Female	AMNH	G. Zhang	2012
Other material	Zelus armillatus	(Lepeletier & Serville, 1825)	UCR_ENT 00047619	Reduviidae	Zelus	armillatus	COLOMBIA	Cundinamarca		Quetame	4.3331	-73.8656	1945-06-01	Unknown	Adult Female	AMNH	G. Zhang	2012			Gazetteer
Other material	Zelus armillatus	(Lepeletier & Serville, 1825)	UCR_ENT 00047620	Reduviidae	Zelus	armillatus	PERU	Loreto		Rio Maranon (Río Marañón)	-4.43	-73.45	1700-12-30	H. Bassler	Adult Female	AMNH	G. Zhang	2012			Google Earth
Other material	Zelus armillatus	(Lepeletier & Serville, 1825)	UCR_ENT 00047621	Reduviidae	Zelus	armillatus	PERU	Amazonas		Rio Santiago	-3.03333	-77.8167	1924-11-23	H. Bassler	Adult Female	AMNH	G. Zhang	2012			Google Earth
Other material	Zelus armillatus	(Lepeletier & Serville, 1825)	UCR_ENT 00047651	Reduviidae	Zelus	armillatus	BRAZIL	Minas Gerais		Pedra Azul	-16.016	-41.266	1970-11-01	F.M. Oliveira	Adult Male	AMNH	G. Zhang	2012			Gazetteer
Other material	Zelus armillatus	(Lepeletier & Serville, 1825)	UCR_ENT 00047652	Reduviidae	Zelus	armillatus	BRAZIL	Minas Gerais		Pedra Azul	-16.016	-41.266	1970-11-01	F.M. Oliveira	Adult Male	AMNH	G. Zhang	2012			Gazetteer
Other material	Zelus armillatus	(Lepeletier & Serville, 1825)	UCR_ENT 00047653	Reduviidae	Zelus	armillatus	BRAZIL	Goias		Leopoldo Bulhoes	-16.6167	-48.7667	1937-11-01	Spitz	Adult Male	AMNH	G. Zhang	2012			Gazetteer
Other material	Zelus armillatus	(Lepeletier & Serville, 1825)	UCR_ENT 00047654	Reduviidae	Zelus	armillatus	COLOMBIA	unknown		Colombia			no date provided	Unknown	Adult Male	AMNH	G. Zhang	2012
Other material	Zelus armillatus	(Lepeletier & Serville, 1825)	UCR_ENT 00047655	Reduviidae	Zelus	armillatus	BRAZIL	Parana		Rolandia	-23.3	-51.3667	1947-10-01	A. Maller	Adult Male	AMNH	G. Zhang	2012			Gazetteer	610 m
Other material	Zelus armillatus	(Lepeletier & Serville, 1825)	UCR_ENT 00047656	Reduviidae	Zelus	armillatus	BRAZIL	Mato Grosso		Mato Gr.	-10.4167	-59.4667	1977-03-17 to 1977-03-22	D. Engleman	Adult Male	AMNH	G. Zhang	2012			Label
Other material	Zelus armillatus	(Lepeletier & Serville, 1825)	UCR_ENT 00047659	Reduviidae	Zelus	armillatus	BRAZIL	Parana		Caviuna	-23.2	-51.3667	1945-12-01	A. Maller	Adult Male	AMNH	G. Zhang	2012			GeoLocate Software
Other material	Zelus armillatus	(Lepeletier & Serville, 1825)	UCR_ENT 00047660	Reduviidae	Zelus	armillatus	BRAZIL	Parana		Caviuna	-23.2	-51.3667	1945-12-01	A. Maller	Adult Male	AMNH	G. Zhang	2012			GeoLocate Software
Other material	Zelus armillatus	(Lepeletier & Serville, 1825)	UCR_ENT 00047661	Reduviidae	Zelus	armillatus	BRAZIL	Parana		Caviuna	-23.2	-51.3667	1944-06-01	A. Maller	Adult Male	AMNH	G. Zhang	2012			GeoLocate Software
Other material	Zelus armillatus	(Lepeletier & Serville, 1825)	UCR_ENT 00047662	Reduviidae	Zelus	armillatus	BOLIVIA	Cochabamba	Chapare	Palmar	-17.1	-65.4833	1905-05-09	F. Steinbach	Adult Male	AMNH	G. Zhang	2012			Gazetteer
Other material	Zelus armillatus	(Lepeletier & Serville, 1825)	UCR_ENT 00070030	Reduviidae	Zelus	armillatus	ARGENTINA	Misiones		Cataratas del Iguazú			1972-01-26	D. J. Brothers	Adult Female	KU	G. Zhang	2012
Other material	Zelus armillatus	(Lepeletier & Serville, 1825)	UCR_ENT 00075079	Reduviidae	Zelus	armillatus	BRAZIL	unknown		Unknown			No date provided	Signoret	Adult Male	NHMW	G. Zhang	2012	Verbatim label info: Brazil [?] Coll. Signoret. / brasiliensis Serville Type det. Signoret / Typus Reduvius brasiliensis LEPELETIER & SERVILLE, 1825 etik. Hecher 1996 REDV. 466/1
Holotype	Zelus auralanus	Zhang and Hart, 2016	UCR_ENT 00069892	Reduviidae	Zelus	auralanus	BRAZIL	Amazonas		Vista Alegre [in formerly-named 'Rio Branco' territory]	0.4578	-66.2489	1924-09-06	J. R. de la Torre-Bueno	Adult Male	KU	G. Zhang	2013			Gazetteer
Paratype	Zelus auralanus	Zhang and Hart, 2016	UCR_ENT 00009502	Reduviidae	Zelus	auralanus	BOLIVIA	Cochabamba		Sajta, Chapare	-17.0086	-64.7866	1992-03-01	L. E. Peña	Adult Female	USNM	G. Zhang	2013	Drake Collection		Google Earth
Paratype	Zelus auralanus	Zhang and Hart, 2016	UCR_ENT 00069893	Reduviidae	Zelus	auralanus	BRAZIL	Amazonas		Vista Alegre [in formerly-named 'Rio Branco' territory]	0.4578	-66.2489	1924-09-06	J. R. de la Torre-Bueno	Adult Female	KU	G. Zhang	2013	Previously designated as 'allotype' of his manuscript name Zelus auralanus by Hart. This type status is not used in the formal publication of this name (Zhang et al.) and this specimen is instead designated as a paratype.		Gazetteer
Paratype	Zelus auralanus	Zhang and Hart, 2016	UCR_ENT 00069894	Reduviidae	Zelus	auralanus	BRAZIL	Amazonas		Vista Alegre [in formerly-named 'Rio Branco' territory]	0.4578	-66.2489	1924-09-06	J. R. de la Torre-Bueno	Adult Male	KU	G. Zhang	2013			Gazetteer
Paratype	Zelus auralanus	Zhang and Hart, 2016	UCR_ENT 00006073	Reduviidae	Zelus	auralanus	BRAZIL	Mato Grosso		Barra do Tapirape	-10.4667	-50.5167	1962-12-26	B. Malkin	Adult Female	CAS	G. Zhang	2013			Gazetteer
Paratype	Zelus auralanus	Zhang and Hart, 2016	UCR_ENT 00019695	Reduviidae	Zelus	auralanus	BRAZIL	Mato Grosso		Barra do Tapirape	-10.4667	-50.5167	1962-12-26	B. Malkin	Adult Male	CAS	G. Zhang	2013			Gazetteer
Paratype	Zelus auralanus	Zhang and Hart, 2016	UCR_ENT 00019696	Reduviidae	Zelus	auralanus	BRAZIL	Mato Grosso		Barra do Tapirape	-10.4667	-50.5167	1962-12-26	B. Malkin	Adult Female	CAS	G. Zhang	2013			Gazetteer
Paratype	Zelus auralanus	Zhang and Hart, 2016	UCR_ENT 00019697	Reduviidae	Zelus	auralanus	BRAZIL	Mato Grosso		Barra do Tapirape	-10.4667	-50.5167	1962-12-26	B. Malkin	Adult Female	CAS	G. Zhang	2013			Gazetteer
Paratype	Zelus auralanus	Zhang and Hart, 2016	UCR_ENT 00019698	Reduviidae	Zelus	auralanus	BRAZIL	Mato Grosso		Barra do Tapirape	-10.4667	-50.5167	1962-12-26	B. Malkin	Adult Female	CAS	G. Zhang	2013			Gazetteer
Paratype	Zelus auralanus	Zhang and Hart, 2016	UCR_ENT 00046999	Reduviidae	Zelus	auralanus	BRAZIL	Mato Grosso		Mato Gr.	-10.4167	-59.4667	1977-03-17 to 1977-03-22	D. Engleman	Adult Female	AMNH	G. Zhang	2013			Label
Paratype	Zelus auralanus	Zhang and Hart, 2016	UCR_ENT 00047080	Reduviidae	Zelus	auralanus	BRAZIL	Para		Tucurui	-3.7	-49.7	1979-01-01	M. Alvarenga	Adult Female	AMNH	G. Zhang	2013			Gazetteer
Paratype	Zelus auralanus	Zhang and Hart, 2016	UCR_ENT 00009459	Reduviidae	Zelus	auralanus	BRAZIL	Rondonia		62 km S Ariquemes, Fazenda Rancho Grande	-10.3	-62.8667	1991-11-11 to 1991-11-22	B. C. Ratcliffe	Adult Female	USNM	G. Zhang	2013				300 m
Paratype	Zelus auralanus	Zhang and Hart, 2016	UCR_ENT 00072667	Reduviidae	Zelus	auralanus	ECUADOR	Napo		30 km E of Pto Napo	-1.04256	-77.6011	2005-03-04	Unknown	Adult Male	UCR	G. Zhang	2013			Label	410 m
Paratype	Zelus auralanus	Zhang and Hart, 2016	UCR_ENT 00072668	Reduviidae	Zelus	auralanus	ECUADOR	Napo		30 km E of Pto Napo	-1.04256	-77.6011	2005-03-06	Unknown	Adult Female	UCR	G. Zhang	2013			Label	410 m
Paratype	Zelus auralanus	Zhang and Hart, 2016	UCR_ENT 00009474	Reduviidae	Zelus	auralanus	ECUADOR	Orellana		Reserva Etnica Waorani, 1 km S. Onkone Gare Camp, Transect Ent.	-0.65714	-76.453	1995-02-10	T. L. Erwin et al.	Adult Male	USNM	G. Zhang	2013	Lot#992 - Collection code moved to this field to prevent duplication; Drake Collection	Fogging	Label	216 m
Paratype	Zelus auralanus	Zhang and Hart, 2016	UCR_ENT 00006072	Reduviidae	Zelus	auralanus	PERU	Huanuco		Monzon valley, Tingo Maria	-9.27816	-76.0556	1954-12-11	E. I. Schlinger & E. S. Ross	Adult Male	CAS	G. Zhang	2013			Google Earth
Holotype	Zelus bahiaensis	Zhang and Hart, 2016	UCR_ENT 00071255	Reduviidae	Zelus	bahiaensis	BRAZIL	Bahia		Agua Preta	-14.5833	-39.2667	No date provided	P. Silva	Adult Male	TAMU	G. Zhang	2013	Name from type locality 'Bahia'. Wrongly spelled in Hart 1972, and changed to bahiaensis.	Unknown
Holotype	Zelus banksi	Zhang and Hart, 2016	UCR_ENT 00057804	Reduviidae	Zelus	banksi	PANAMA	Canal Zone	none	Barro Colorado	9.16666	-79.8333	1924-06-25	N. Banks	Adult Male	AMNH	G. Zhang	2013			Google Earth
Paratype	Zelus banksi	Zhang and Hart, 2016	UCR_ENT 00071253	Reduviidae	Zelus	banksi	COLOMBIA	Meta	none	Rio Guayuriba	4.01978	-73.6081	1947-09-06	Richter	Adult Male	TAMU	G. Zhang	2013			Google Earth	400 m
Paratype	Zelus banksi	Zhang and Hart, 2016	UCR_ENT 00009559	Reduviidae	Zelus	banksi	COLOMBIA	Valle del Cauca	none	Palmira	3.5364	-76.3036	1939-08-25	F. J. Otoya	Adult Male	USNM	G. Zhang	2013	Drake Collection		Gazetteer
Paratype	Zelus banksi	Zhang and Hart, 2016	UCR_ENT 00029366	Reduviidae	Zelus	banksi	COSTA RICA	Alajuela	none	Higuito, San Mateo	9.95	-84.55	no date provided	Pablo Schild	Adult Male	USNM	G. Zhang	2013	Genitalia dissected.		Gazetteer	254 m
Paratype	Zelus banksi	Zhang and Hart, 2016	UCR_ENT 00014431	Reduviidae	Zelus	banksi	COSTA RICA	Puntarenas	none	Rancho Quemado, Peninsula de Osa	8.67776	-83.5648	1991-11-01	F. Quesada	Adult Male	INBIO	G. Zhang	2013			Label	200 m
Paratype	Zelus banksi	Zhang and Hart, 2016	UCR_ENT 00015110	Reduviidae	Zelus	banksi	PANAMA	Canal Zone	none	Barro Colorado Island	9.15562	-79.849	1924-06-26	N. Banks	Adult Male	AMNH	G. Zhang	2013			Google Earth
Holotype	Zelus bruneri	de Zayas, 1960		Reduviidae	Zelus	bruneri	Cuba			Piloto, Moa, Oriente	20.55	-75.7833	1954-06		Adult male				Deposited m the collection of Prof. F. de Zayas. Not available for examination in current study.		Gazetteer
Paratype	Zelus bruneri	de Zayas, 1960		Reduviidae	Zelus	bruneri	Cuba			Piloto, Moa, Oriente	20.55	-75.7833	1954-06		Adult male				Deposited m the collection of Prof. F. de Zayas. Not available for examination in current study.		Gazetteer
Holotype	Zelus casii	Zhang and Hart, 2016	UCR_ENT 00048228	Reduviidae	Zelus	casii	BRAZIL	Amapa		Villa Amazonas	0.03333	-51.05	1964-05-29	C. E. & E. S. Ross	Adult Male	CAS	G. Zhang	2013	CAS Type No. 12716				CAS Type No. 12716
Lectotype	Zelus cervicalis	Stål, 1872	None	Reduviidae	Zelus	cervicalis	USA			Carolin. mer.				Belfrage	Adult Female	NHRS			Labels: Carolin. mer./Belfrage/Typus/cervicalis Stål. Lectotype designated by Hart 1986.
Allolectotype	Zelus cervicalis	Stål, 1872	None	Reduviidae	Zelus	cervicalis	USA			Carolin. mer.				Belfrage	Adult Male	NHRS			Labels: Carolin. mer./Belfrage/Allotypus. Allolectotype designated by Hart 1986.
Paralectotype	Zelus cervicalis	Stål, 1872	None	Reduviidae	Zelus	cervicalis	USA			Carolin. mer.				Belfrage	Adult Female	NHRS			Labels: Carolin. mer./Belfrage/paratypus. Paralectotype designated by Hart 1986.
Paralectotype	Zelus cervicalis	Stål, 1872	None	Reduviidae	Zelus	cervicalis	USA			Carolin. mer.				Belfrage	Adult Male	NHRS			Labels: Carolin. mer./Belfrage/paratypus. Paralectotype designated by Hart 1986.
Paralectotype	Zelus cervicalis	Stål, 1872	None	Reduviidae	Zelus	cervicalis	USA			Texas				Belfrage	Adult Male	NHRS			Labels: Texas/Belfrage/paratypus. Paralectotype designated by Hart 1986.
Paralectotype	Zelus cervicalis	Stål, 1872	None	Reduviidae	Zelus	cervicalis	USA			Texas				Belfrage	Adult Female	NHRS			Labels: Texas/Belfrage/paratypus. Paralectotype designated by Hart 1986.
Other material	Zelus cervicalis	Stål, 1872	UCR_ENT 00015729	Reduviidae	Zelus	cervicalis	USA	Florida	Palm Beach	Jupiter	26.9339	-80.0944	1938-12-17	F. E. Watson, L. J. Sanford	Adult Male	AMNH	G. Zhang	2012			Gazetteer
Other material	Zelus cervicalis	Stål, 1872	UCR_ENT 00015730	Reduviidae	Zelus	cervicalis	USA	Florida	Orange	Winter Park	28.5997	-81.3394	1939-08-01 to 1939-08-12	H. Ruckes	Adult Male	AMNH	G. Zhang	2012
Other material	Zelus cervicalis	Stål, 1872	UCR_ENT 00015731	Reduviidae	Zelus	cervicalis	USA	Florida	Orange	Winter Park	28.5997	-81.3394	1939-08-01 to 1939-08-12	H. Ruckes	Adult Male	AMNH	G. Zhang	2012
Other material	Zelus cervicalis	Stål, 1872	UCR_ENT 00015732	Reduviidae	Zelus	cervicalis	USA	Florida	Orange	Winter Park	28.5997	-81.3394	1939-08-01 to 1939-08-12	H. Ruckes	Adult Male	AMNH	G. Zhang	2012
Other material	Zelus cervicalis	Stål, 1872	UCR_ENT 00015733	Reduviidae	Zelus	cervicalis	USA	Florida	Orange	Winter Park	28.5997	-81.3394	1939-08-01 to 1939-08-12	H. Ruckes	Adult Male	AMNH	G. Zhang	2012
Other material	Zelus cervicalis	Stål, 1872	UCR_ENT 00015734	Reduviidae	Zelus	cervicalis	USA	Florida	Escambia	Pensacola	30.4211	-87.2169	1914-10-11 to 1914-10-14	Unknown	Adult Male	AMNH	G. Zhang	2012
Other material	Zelus cervicalis	Stål, 1872	UCR_ENT 00015735	Reduviidae	Zelus	cervicalis	USA	Florida	Polk	Lakeland	28.0392	-81.95	1911-11-10	Unknown	Adult Male	AMNH	G. Zhang	2012			Gazetteer
Other material	Zelus cervicalis	Stål, 1872	UCR_ENT 00015736	Reduviidae	Zelus	cervicalis	USA	Florida	Polk	Lakeland	28.0392	-81.95	1911-11-10	Unknown	Adult Male	AMNH	G. Zhang	2012			Gazetteer
Other material	Zelus cervicalis	Stål, 1872	UCR_ENT 00015737	Reduviidae	Zelus	cervicalis	USA	Florida	Polk	Lakeland	28.0392	-81.95	1911-11-10	Unknown	Adult Male	AMNH	G. Zhang	2012			Gazetteer
Other material	Zelus cervicalis	Stål, 1872	UCR_ENT 00015738	Reduviidae	Zelus	cervicalis	USA	Florida	Polk	Lakeland	28.0392	-81.95	1911-11-10	Unknown	Adult Male	AMNH	G. Zhang	2012			Gazetteer
Other material	Zelus cervicalis	Stål, 1872	UCR_ENT 00015739	Reduviidae	Zelus	cervicalis	USA	Florida	Polk	Lakeland	28.0392	-81.95	1912-05-04	Unknown	Adult Male	AMNH	G. Zhang	2012			Gazetteer
Other material	Zelus cervicalis	Stål, 1872	UCR_ENT 00015740	Reduviidae	Zelus	cervicalis	USA	Florida	Alachua	Gainesville	29	-82	1914-09-26 to 1914-10-02	Unknown	Adult Male	AMNH	G. Zhang	2012			Label	25 m
Other material	Zelus cervicalis	Stål, 1872	UCR_ENT 00015741	Reduviidae	Zelus	cervicalis	USA	Florida	Alachua	Gainesville	29	-82	1914-09-26 to 1914-10-02	Unknown	Adult Male	AMNH	G. Zhang	2012			Label	25 m
Other material	Zelus cervicalis	Stål, 1872	UCR_ENT 00015742	Reduviidae	Zelus	cervicalis	USA	Florida	Hendry	LaBelle	26.7605	-81.4392	1912-04-27	Unknown	Adult Male	AMNH	G. Zhang	2012			Google Earth
Other material	Zelus cervicalis	Stål, 1872	UCR_ENT 00015743	Reduviidae	Zelus	cervicalis	USA	Florida	Seminole	Sanford	28.8006	-81.2731	1908-04-27	Van Duzee	Adult Male	AMNH	G. Zhang	2012			GeoLocate Software
Other material	Zelus cervicalis	Stål, 1872	UCR_ENT 00016059	Reduviidae	Zelus	cervicalis	USA	Florida	Seminole	Sanford	28.8006	-81.2731	1908-04-27	Van Duzee	Adult Male	AMNH	G. Zhang	2012			GeoLocate Software
Other material	Zelus cervicalis	Stål, 1872	UCR_ENT 00016060	Reduviidae	Zelus	cervicalis	USA	Florida	Lee	Fort Myers	26.6403	-81.8725	1912-04-23	Unknown	Adult Male	AMNH	G. Zhang	2012
Other material	Zelus cervicalis	Stål, 1872	UCR_ENT 00016061	Reduviidae	Zelus	cervicalis	USA	Florida	Indian River	Sebastian	27.8164	-80.4706	November	G. Nelson	Adult Male	AMNH	G. Zhang	2012			Gazetteer
Other material	Zelus cervicalis	Stål, 1872	UCR_ENT 00016062	Reduviidae	Zelus	cervicalis	USA	Florida	Indian River	Sebastian	27.8164	-80.4706	April	G. Nelson	Adult Male	AMNH	G. Zhang	2012			Gazetteer
Other material	Zelus cervicalis	Stål, 1872	UCR_ENT 00016063	Reduviidae	Zelus	cervicalis	USA	Florida	Jefferson	Monticello	30.545	-83.87	1700-08-17	G. Fairchild	Adult Male	AMNH	G. Zhang	2012			GeoLocate Software
Other material	Zelus cervicalis	Stål, 1872	UCR_ENT 00016064	Reduviidae	Zelus	cervicalis	USA	Florida	Seminole	Seminole County	28.7083	-81.2083	1900-06-10	E. M. Davis	Adult Male	AMNH	G. Zhang	2012
Other material	Zelus cervicalis	Stål, 1872	UCR_ENT 00016065	Reduviidae	Zelus	cervicalis	USA	Florida	Putnam	Palatka	29.6486	-81.6376	no date provided	Unknown	Adult Male	AMNH	G. Zhang	2012			Gazetteer
Other material	Zelus cervicalis	Stål, 1872	UCR_ENT 00016066	Reduviidae	Zelus	cervicalis	USA	Florida	Miami-Dade	Long Pine Key	25.409	-80.6862	2015-12-28	W. M. Wheeler	Adult Male	AMNH	G. Zhang	2012			Gazetteer
Other material	Zelus cervicalis	Stål, 1872	UCR_ENT 00016067	Reduviidae	Zelus	cervicalis	USA	Florida	Marion	nr. Reddick	29.3683	-82.1977	2015-04-24	E. M. Davis	Adult Male	AMNH	G. Zhang	2012			GeoLocate Software
Other material	Zelus cervicalis	Stål, 1872	UCR_ENT 00016068	Reduviidae	Zelus	cervicalis	USA	Louisiana	Lincoln	5 mi E. Ruston	32.5232	-92.5521	1952-05-08	M. Cazier, W. Gertsch, R. Schrammel	Adult Male	AMNH	G. Zhang	2012			Google Earth
Other material	Zelus cervicalis	Stål, 1872	UCR_ENT 00016069	Reduviidae	Zelus	cervicalis	USA	Mississippi	Hinds	Jackson	32.2988	-90.1848	1952-05-07	M. A. Cazier, W. Gertsch, and R. Schrammel	Adult Male	AMNH	G. Zhang	2012			Gazetteer
Other material	Zelus cervicalis	Stål, 1872	UCR_ENT 00016070	Reduviidae	Zelus	cervicalis	USA	Florida	Pinellas	Clearwater	27.9658	-82.8001	1908-04-29	Van Duzee	Adult Male	AMNH	G. Zhang	2012			Gazetteer
Other material	Zelus cervicalis	Stål, 1872	UCR_ENT 00016071	Reduviidae	Zelus	cervicalis	USA	Florida	Duval	Jacksonville	30.3319	-81.6558	no date provided	Unknown	Adult Male	AMNH	G. Zhang	2012
Other material	Zelus cervicalis	Stål, 1872	UCR_ENT 00016072	Reduviidae	Zelus	cervicalis	USA	Florida	Volusia	Ormond	29.1709	-81.0321	no date provided	Unknown	Adult Male	AMNH	G. Zhang	2012				2 m
Other material	Zelus cervicalis	Stål, 1872	UCR_ENT 00016073	Reduviidae	Zelus	cervicalis	USA	Florida	Lake	Leesburg	28.8106	-81.8781	1954-03-01 to 1954-03-11	M. Statham	Adult Male	AMNH	G. Zhang	2012			Gazetteer
Other material	Zelus cervicalis	Stål, 1872	UCR_ENT 00016074	Reduviidae	Zelus	cervicalis	USA	Florida	Lake	Leesburg	28.8106	-81.8781	1954-03-01 to 1954-03-11	M. Statham	Adult Male	AMNH	G. Zhang	2012			Gazetteer
Other material	Zelus cervicalis	Stål, 1872	UCR_ENT 00016075	Reduviidae	Zelus	cervicalis	USA	Florida	Lake	Leesburg	28.8106	-81.8781	1954-03-01 to 1954-03-11	M. Statham	Adult Male	AMNH	G. Zhang	2012			Gazetteer
Other material	Zelus cervicalis	Stål, 1872	UCR_ENT 00016076	Reduviidae	Zelus	cervicalis	USA	Florida	Duval	Jacksonville	30.3319	-81.6558	1750-01-01	Unknown	Adult Male	AMNH	G. Zhang	2012
Other material	Zelus cervicalis	Stål, 1872	UCR_ENT 00016077	Reduviidae	Zelus	cervicalis	USA	Florida	Duval	Jacksonville	30.3319	-81.6558	1750-01-01	Unknown	Adult Male	AMNH	G. Zhang	2012
Other material	Zelus cervicalis	Stål, 1872	UCR_ENT 00016078	Reduviidae	Zelus	cervicalis	USA	Florida	Levy	Levy County	29.2917	-82.7494	1955-05-05	H. A. Denmark	Adult Male	AMNH	G. Zhang	2012			GeoLocate Software
Other material	Zelus cervicalis	Stål, 1872	UCR_ENT 00016079	Reduviidae	Zelus	cervicalis	USA	Florida	Gulf	Port Saint Joe	29.8116	-85.3054	1954-10-25	G. R. Ferguson	Adult Male	AMNH	G. Zhang	2012			Google Earth
Other material	Zelus cervicalis	Stål, 1872	UCR_ENT 00016080	Reduviidae	Zelus	cervicalis	USA	Florida	Miami-Dade	Everglades National Park	25.3125	-80.9375	1962-11-26	Slater, Woodward, Sweet	Adult Male	AMNH	G. Zhang	2012			Google Earth
Other material	Zelus cervicalis	Stål, 1872	UCR_ENT 00016081	Reduviidae	Zelus	cervicalis	USA	Florida	Miami-Dade	Princeton	25.5381	-80.4092	1946-02-02	Esselbaugh	Adult Male	AMNH	G. Zhang	2012			Gazetteer	2 m
Other material	Zelus cervicalis	Stål, 1872	UCR_ENT 00016082	Reduviidae	Zelus	cervicalis	USA	Florida	Miami-Dade	Homestead	25.4683	-80.4778	1946-03-10	Esselbaugh	Adult Male	AMNH	G. Zhang	2012			GeoLocate Software
Other material	Zelus cervicalis	Stål, 1872	UCR_ENT 00016083	Reduviidae	Zelus	cervicalis	USA	Florida	Duval	Duval Co.	30.3569	-81.6315	no date provided	Ashmead	Adult Male	AMNH	G. Zhang	2012			Gazetteer
Other material	Zelus cervicalis	Stål, 1872	UCR_ENT 00016084	Reduviidae	Zelus	cervicalis	USA	Florida	Duval	Jacksonville	30.3319	-81.6558	1750-01-01	Unknown	Adult Female	AMNH	G. Zhang	2012
Other material	Zelus cervicalis	Stål, 1872	UCR_ENT 00016085	Reduviidae	Zelus	cervicalis	USA	Florida	Gadsden	Quincy	30.5871	-84.5833	1940-07-05 to 1940-07-15	H. Ruckes	Adult Female	AMNH	G. Zhang	2012			Gazetteer	63 m
Other material	Zelus cervicalis	Stål, 1872	UCR_ENT 00016086	Reduviidae	Zelus	cervicalis	USA	Florida	Palm Beach	Jupiter	26.9339	-80.0944	1938-12-17	F. E. Watson, L. J. Sanford	Adult Female	AMNH	G. Zhang	2012			Gazetteer
Other material	Zelus cervicalis	Stål, 1872	UCR_ENT 00016087	Reduviidae	Zelus	cervicalis	USA	Florida	Orange	Winter Park	28.5997	-81.3394	1937-04-07	F. E. Lutz	Adult Female	AMNH	G. Zhang	2012
Other material	Zelus cervicalis	Stål, 1872	UCR_ENT 00016088	Reduviidae	Zelus	cervicalis	USA	Florida	Orange	Winter Park	28.5997	-81.3394	1939-08-01 to 1939-08-12	H. Ruckes	Adult Female	AMNH	G. Zhang	2012
Other material	Zelus cervicalis	Stål, 1872	UCR_ENT 00016089	Reduviidae	Zelus	cervicalis	USA	Florida	Orange	Winter Park	28.5997	-81.3394	1939-08-01 to 1939-08-12	H. Ruckes	Adult Female	AMNH	G. Zhang	2012
Other material	Zelus cervicalis	Stål, 1872	UCR_ENT 00016090	Reduviidae	Zelus	cervicalis	USA	Florida	Collier	Naples	26.1417	-81.795	1946-02-01	S. Rounds	Adult Female	AMNH	G. Zhang	2012
Other material	Zelus cervicalis	Stål, 1872	UCR_ENT 00016091	Reduviidae	Zelus	cervicalis	USA	Florida	Collier	Naples	26.1417	-81.795	1946-02-01	S. Rounds	Adult Female	AMNH	G. Zhang	2012
Other material	Zelus cervicalis	Stål, 1872	UCR_ENT 00016092	Reduviidae	Zelus	cervicalis	USA	Florida	Escambia	Pensacola	30.4211	-87.2169	1914-10-11 to 1914-10-02	Unknown	Adult Female	AMNH	G. Zhang	2012
Other material	Zelus cervicalis	Stål, 1872	UCR_ENT 00016093	Reduviidae	Zelus	cervicalis	USA	Florida	Escambia	Pensacola	30.4211	-87.2169	1914-10-11 to 1914-10-02	Unknown	Adult Female	AMNH	G. Zhang	2012
Other material	Zelus cervicalis	Stål, 1872	UCR_ENT 00016094	Reduviidae	Zelus	cervicalis	USA	Florida	Polk	Lakeland	28.0392	-81.95	1912-05-05	Unknown	Adult Female	AMNH	G. Zhang	2012			Gazetteer
Other material	Zelus cervicalis	Stål, 1872	UCR_ENT 00016095	Reduviidae	Zelus	cervicalis	USA	Florida	Polk	Lakeland	28.0392	-81.95	1911-11-10	Unknown	Adult Female	AMNH	G. Zhang	2012			Gazetteer
Other material	Zelus cervicalis	Stål, 1872	UCR_ENT 00016096	Reduviidae	Zelus	cervicalis	USA	Florida	Polk	Lakeland	28.0392	-81.95	1911-11-10	Unknown	Adult Female	AMNH	G. Zhang	2012			Gazetteer
Other material	Zelus cervicalis	Stål, 1872	UCR_ENT 00016097	Reduviidae	Zelus	cervicalis	USA	Florida	Polk	Lakeland	28.0392	-81.95	1911-11-10	Unknown	Adult Female	AMNH	G. Zhang	2012			Gazetteer
Other material	Zelus cervicalis	Stål, 1872	UCR_ENT 00016098	Reduviidae	Zelus	cervicalis	USA	Florida	Polk	Lakeland	28.0392	-81.95	1911-11-09	Unknown	Adult Female	AMNH	G. Zhang	2012			Gazetteer
Other material	Zelus cervicalis	Stål, 1872	UCR_ENT 00016099	Reduviidae	Zelus	cervicalis	USA	Florida	Polk	Lakeland	28.0392	-81.95	1911-11-08	Unknown	Adult Female	AMNH	G. Zhang	2012			Gazetteer
Other material	Zelus cervicalis	Stål, 1872	UCR_ENT 00016100	Reduviidae	Zelus	cervicalis	USA	Florida	Polk	Lakeland	28.0392	-81.95	1911-11-08	Unknown	Adult Female	AMNH	G. Zhang	2012			Gazetteer
Other material	Zelus cervicalis	Stål, 1872	UCR_ENT 00016101	Reduviidae	Zelus	cervicalis	USA	Florida	Alachua	Gainesville	29	-82	1936-09-04	H. G. Barber	Adult Female	AMNH	G. Zhang	2012			Label	25 m
Other material	Zelus cervicalis	Stål, 1872	UCR_ENT 00016102	Reduviidae	Zelus	cervicalis	USA	Florida	Alachua	Gainesville	29	-82	1914-09-26 to 1914-10-02	Unknown	Adult Female	AMNH	G. Zhang	2012			Label	25 m
Other material	Zelus cervicalis	Stål, 1872	UCR_ENT 00016103	Reduviidae	Zelus	cervicalis	USA	Florida	Alachua	Gainesville	29	-82	1914-09-26 to 1914-10-02	Unknown	Adult Female	AMNH	G. Zhang	2012			Label	25 m
Other material	Zelus cervicalis	Stål, 1872	UCR_ENT 00016104	Reduviidae	Zelus	cervicalis	USA	Florida	Alachua	Gainesville	29	-82	1914-09-26 to 1914-10-02	Unknown	Adult Female	AMNH	G. Zhang	2012			Label	25 m
Other material	Zelus cervicalis	Stål, 1872	UCR_ENT 00016105	Reduviidae	Zelus	cervicalis	USA	Florida	Seminole	Sanford	28.8006	-81.2731	1908-04-26	Van Duzee	Adult Female	AMNH	G. Zhang	2012			GeoLocate Software
Other material	Zelus cervicalis	Stål, 1872	UCR_ENT 00016106	Reduviidae	Zelus	cervicalis	USA	Florida	Lee	Fort Myers	26.6403	-81.8725	1911-11-15	Unknown	Adult Female	AMNH	G. Zhang	2012
Other material	Zelus cervicalis	Stål, 1872	UCR_ENT 00016107	Reduviidae	Zelus	cervicalis	USA	Florida	Escambia	Warrington	30.3841	-87.275	1903-08-04	A. P. Morse	Adult Female	AMNH	G. Zhang	2012			Gazetteer
Other material	Zelus cervicalis	Stål, 1872	UCR_ENT 00016108	Reduviidae	Zelus	cervicalis	USA	Florida	Indian River	Sebastian	27.8164	-80.4706	November	G. Nelson	Adult Female	AMNH	G. Zhang	2012			Gazetteer
Other material	Zelus cervicalis	Stål, 1872	UCR_ENT 00016109	Reduviidae	Zelus	cervicalis	USA	Florida	Indian River	Sebastian	27.8164	-80.4706	November	G. Nelson	Adult Female	AMNH	G. Zhang	2012			Gazetteer
Other material	Zelus cervicalis	Stål, 1872	UCR_ENT 00016110	Reduviidae	Zelus	cervicalis	USA	Florida	Indian River	Sebastian	27.8164	-80.4706	November	G. Nelson	Adult Female	AMNH	G. Zhang	2012			Gazetteer
Other material	Zelus cervicalis	Stål, 1872	UCR_ENT 00016111	Reduviidae	Zelus	cervicalis	USA	Florida	Indian River	Sebastian	27.8164	-80.4706	November	G. Nelson	Adult Female	AMNH	G. Zhang	2012			Gazetteer
Other material	Zelus cervicalis	Stål, 1872	UCR_ENT 00016112	Reduviidae	Zelus	cervicalis	USA	Florida	Indian River	Sebastian	27.8164	-80.4706	April	G. Nelson	Adult Female	AMNH	G. Zhang	2012			Gazetteer
Other material	Zelus cervicalis	Stål, 1872	UCR_ENT 00016113	Reduviidae	Zelus	cervicalis	USA	Florida	Indian River	Wabasso	27.7481	-80.4364	1700-04-09	Nelson	Adult Female	AMNH	G. Zhang	2012			GeoLocate Software
Other material	Zelus cervicalis	Stål, 1872	UCR_ENT 00016114	Reduviidae	Zelus	cervicalis	USA	Florida	Miami-Dade	Miami	25.7739	-80.1939	1923-04-11 to 1923-04-21	Unknown	Adult Female	AMNH	G. Zhang	2012			Gazetteer	1 m
Other material	Zelus cervicalis	Stål, 1872	UCR_ENT 00016115	Reduviidae	Zelus	cervicalis	USA	Louisiana	Lincoln	5 mi E. Ruston	32.5232	-92.5521	1952-05-08	M. Cazier, W. Gertsch, R. Schrammel	Adult Female	AMNH	G. Zhang	2012			Google Earth
Other material	Zelus cervicalis	Stål, 1872	UCR_ENT 00016116	Reduviidae	Zelus	cervicalis	USA	Florida	Pinellas	Saint Petersburg	27.7709	-82.6793	1908-10-28	Van Duzee	Adult Female	AMNH	G. Zhang	2012			Gazetteer
Other material	Zelus cervicalis	Stål, 1872	UCR_ENT 00016117	Reduviidae	Zelus	cervicalis	USA	Florida	Hillsborough	Tampa	27.9472	-82.4586	1919-03-01	Unknown	Adult Female	AMNH	G. Zhang	2012
Other material	Zelus cervicalis	Stål, 1872	UCR_ENT 00016118	Reduviidae	Zelus	cervicalis	USA	Florida	Miami-Dade	Biscayne Bay	25.5747	-80.3112	no date provided	Unknown	Adult Female	AMNH	G. Zhang	2012			GeoLocate Software
Other material	Zelus cervicalis	Stål, 1872	UCR_ENT 00016119	Reduviidae	Zelus	cervicalis	USA	Florida	Miami-Dade	Biscayne Bay	25.5747	-80.3112	no date provided	Unknown	Adult Female	AMNH	G. Zhang	2012			GeoLocate Software
Other material	Zelus cervicalis	Stål, 1872	UCR_ENT 00016120	Reduviidae	Zelus	cervicalis	USA	Florida	Martin	Indiantown	27.0269	-80.4858	1938-03-28	W. J. Gertsch	Adult Female	AMNH	G. Zhang	2012			Gazetteer
Other material	Zelus cervicalis	Stål, 1872	UCR_ENT 00016121	Reduviidae	Zelus	cervicalis	USA	Florida	Duval	Jacksonville	30.3319	-81.6558	1750-01-01	Unknown	Adult Female	AMNH	G. Zhang	2012
Other material	Zelus cervicalis	Stål, 1872	UCR_ENT 00016122	Reduviidae	Zelus	cervicalis	USA	Florida	Duval	Jacksonville	30.3319	-81.6558	1750-01-01	Unknown	Adult Female	AMNH	G. Zhang	2012
Other material	Zelus cervicalis	Stål, 1872	UCR_ENT 00016123	Reduviidae	Zelus	cervicalis	USA	Florida	Volusia	Ormond	29.1709	-81.0321	1750-01-01	Unknown	Adult Female	AMNH	G. Zhang	2012				2 m
Other material	Zelus cervicalis	Stål, 1872	UCR_ENT 00016124	Reduviidae	Zelus	cervicalis	USA	Florida	Sumter	Tarrytown	28.555	-82.0545	1954-10-24	G. R. Ferguson	Adult Female	AMNH	G. Zhang	2012			Gazetteer
Other material	Zelus cervicalis	Stål, 1872	UCR_ENT 00016125	Reduviidae	Zelus	cervicalis	USA	Florida	Miami-Dade	Everglades National Park	25.3125	-80.9375	1961-11-26	Slater, Woodward, Sweet	Adult Female	AMNH	G. Zhang	2012			Google Earth
Other material	Zelus cervicalis	Stål, 1872	UCR_ENT 00016126	Reduviidae	Zelus	cervicalis	USA	Florida	Miami-Dade	Princeton	25.5381	-80.4092	1945-12-18	Esselbaugh	Adult Female	AMNH	G. Zhang	2012			Gazetteer	2 m
Other material	Zelus cervicalis	Stål, 1872	UCR_ENT 00016127	Reduviidae	Zelus	cervicalis	USA	Texas	Cameron	Laguna madre, 25 mi SE Harlingen	25.8271	-97.6958	1945-07-07	D. E. Hardy	Adult Male	AMNH	G. Zhang	2012			Google Earth
Other material	Zelus cervicalis	Stål, 1872	UCR_ENT 00016128	Reduviidae	Zelus	cervicalis	USA	Texas	Gregg	6 mi E of Longview	32.501	-94.637	1950-07-11	T. Cohn, P. Boone, M. Cazier	Adult Male	AMNH	G. Zhang	2012			GeoLocate Software
Other material	Zelus cervicalis	Stål, 1872	UCR_ENT 00016129	Reduviidae	Zelus	cervicalis	USA	Texas	Gregg	6 mi E of Longview	32.501	-94.637	1950-07-11	T. Cohn, P. Boone, M. Cazier	Adult Female	AMNH	G. Zhang	2012			GeoLocate Software
Other material	Zelus cervicalis	Stål, 1872	UCR_ENT 00016130	Reduviidae	Zelus	cervicalis	USA	Texas	Brown	Brownwood	31.7095	-98.991	no date provided	N. Banks	Adult Female	AMNH	G. Zhang	2012			Google Earth	419 m
Other material	Zelus cervicalis	Stål, 1872	UCR_ENT 00016131	Reduviidae	Zelus	cervicalis	USA	Texas	Dallas	Dallas (City of)	32.7833	-96.8	1750-01-01	Boll	Adult Female	AMNH	G. Zhang	2012			GeoLocate Software
Other material	Zelus cervicalis	Stål, 1872	UCR_ENT 00016132	Reduviidae	Zelus	cervicalis	USA	Texas	Dallas	Dallas (City of)	32.7833	-96.8	1750-01-01	Boll	Adult Female	AMNH	G. Zhang	2012			GeoLocate Software
Other material	Zelus cervicalis	Stål, 1872	UCR_ENT 00016133	Reduviidae	Zelus	cervicalis	USA	Texas	Dallas	Dallas (City of)	32.7833	-96.8	1750-01-01	Boll	Adult Female	AMNH	G. Zhang	2012			GeoLocate Software
Other material	Zelus cervicalis	Stål, 1872	UCR_ENT 00016134	Reduviidae	Zelus	cervicalis	USA	Texas	Dallas	Dallas (City of)	32.7833	-96.8	1750-01-01	Boll	Adult Female	AMNH	G. Zhang	2012			GeoLocate Software
Other material	Zelus cervicalis	Stål, 1872	UCR_ENT 00016135	Reduviidae	Zelus	cervicalis	USA	Texas	Dallas	Dallas (City of)	32.7833	-96.8	1750-01-01	Boll	Adult Female	AMNH	G. Zhang	2012			GeoLocate Software
Other material	Zelus cervicalis	Stål, 1872	UCR_ENT 00016136	Reduviidae	Zelus	cervicalis	USA	Texas	Cameron	Laguna madre, 25 mi SE Harlingen	25.8271	-97.6958	1945-07-07	D. E. Hardy	Adult Female	AMNH	G. Zhang	2012			Google Earth
Other material	Zelus cervicalis	Stål, 1872	UCR_ENT 00016137	Reduviidae	Zelus	cervicalis	USA	Texas	Cameron	Laguna madre, 25 mi SE Harlingen	25.8271	-97.6958	1945-07-07	D. E. Hardy	Adult Female	AMNH	G. Zhang	2012			Google Earth
Other material	Zelus cervicalis	Stål, 1872	UCR_ENT 00017000	Reduviidae	Zelus	cervicalis	USA	Georgia	Chatham	Tybee Island	32.0155	-80.8612	1903-08-13	A. P. Morse	Adult Male	AMNH	G. Zhang	2012			Gazetteer
Other material	Zelus cervicalis	Stål, 1872	UCR_ENT 00017001	Reduviidae	Zelus	cervicalis	USA	Georgia	DeKalb	Stone Mountain	33.8082	-84.1702	1903-07-28	A. P. Morse	Adult Male	AMNH	G. Zhang	2012
Other material	Zelus cervicalis	Stål, 1872	UCR_ENT 00017002	Reduviidae	Zelus	cervicalis	USA	Georgia	Chatham	Savannah	32.0835	-81.0998	1906-06-25	Unknown	Adult Male	AMNH	G. Zhang	2012			Gazetteer
Other material	Zelus cervicalis	Stål, 1872	UCR_ENT 00017003	Reduviidae	Zelus	cervicalis	USA	Arizona	Cochise	Southwestern Research Station (SWRS), 5 mi W of Portal	31.8825	-109.206	1956-11-08	E. Ordway	Adult Male	AMNH	G. Zhang	2012			GeoLocate Software	1646 m
Other material	Zelus cervicalis	Stål, 1872	UCR_ENT 00017004	Reduviidae	Zelus	cervicalis	USA	Georgia	Bamberg	Denmark	33.3227	-81.1423	1903-08-15	A. P. Morse	Adult Male	AMNH	G. Zhang	2012			Gazetteer
Other material	Zelus cervicalis	Stål, 1872	UCR_ENT 00017005	Reduviidae	Zelus	cervicalis	USA	South Carolina	Charleston	Charleston	32.7764	-79.9311	1943-06-15 to 1943-06-30	B. Malkin	Adult Male	AMNH	G. Zhang	2012			GeoLocate Software
Other material	Zelus cervicalis	Stål, 1872	UCR_ENT 00017006	Reduviidae	Zelus	cervicalis	USA	South Carolina	Charleston	Charleston	32.7764	-79.9311	1943-06-15 to 1943-06-30	B. Malkin	Adult Male	AMNH	G. Zhang	2012			GeoLocate Software
Other material	Zelus cervicalis	Stål, 1872	UCR_ENT 00017007	Reduviidae	Zelus	cervicalis	USA	South Carolina	Charleston	McClellanville	33.0882	-79.4612	1945-07-02	P. Vaurie	Adult Female	AMNH	G. Zhang	2012			Gazetteer
Other material	Zelus cervicalis	Stål, 1872	UCR_ENT 00017008	Reduviidae	Zelus	cervicalis	USA	Georgia	Chatham	Savannah	32.0835	-81.0998	1906-06-25	Unknown	Adult Female	AMNH	G. Zhang	2012			Gazetteer
Other material	Zelus cervicalis	Stål, 1872	UCR_ENT 00017009	Reduviidae	Zelus	cervicalis	USA	Georgia	Macon	Flint River, Oglethorpe	32.2946	-84.044	1953-07-26	G. Ferguson	Adult Female	AMNH	G. Zhang	2012			Google Earth
Other material	Zelus cervicalis	Stål, 1872	UCR_ENT 00017010	Reduviidae	Zelus	cervicalis	USA	North Carolina	Moore	Southern Pines	35.1741	-79.3923	1905-04-06	A. H. Manee	Adult Male	AMNH	G. Zhang	2012			Gazetteer
Other material	Zelus cervicalis	Stål, 1872	UCR_ENT 00017011	Reduviidae	Zelus	cervicalis	USA	Mississippi	Sharkey	4 mi S. Onward	32.6672	-90.942	1956-06-12	G. R. Ferguson	Adult Male	AMNH	G. Zhang	2012			Google Earth
Other material	Zelus cervicalis	Stål, 1872	UCR_ENT 00017012	Reduviidae	Zelus	cervicalis	USA	Virginia	Fauquier	Petersburg	38.9093	-78.0533	1939-07-29	H. Ruckes	Adult Male	AMNH	G. Zhang	2012			Gazetteer
Other material	Zelus cervicalis	Stål, 1872	UCR_ENT 00017013	Reduviidae	Zelus	cervicalis	USA	Louisiana	Caddo	Shreveport	32.525	-93.75	no date provided	N. Banks	Adult Male	AMNH	G. Zhang	2012			Gazetteer	45 m
Other material	Zelus cervicalis	Stål, 1872	UCR_ENT 00017014	Reduviidae	Zelus	cervicalis	USA	Louisiana	Madison	Delta	32.3256	-90.9269	1952-05-08	M. Cazier, W. Gertsch, and R. Schrammel	Adult Female	AMNH	G. Zhang	2012			GeoLocate Software
Other material	Zelus cervicalis	Stål, 1872	UCR_ENT 00017015	Reduviidae	Zelus	cervicalis	USA	Alabama	Baldwin	Silverhill	30.5453	-87.7517		G. Nelson	Adult Female	AMNH	G. Zhang	2012			GeoLocate Software
Other material	Zelus cervicalis	Stål, 1872	UCR_ENT 00017016	Reduviidae	Zelus	cervicalis	USA	Mississippi	Forrest	Hattiesburg	31.3269	-89.29	1944-02-27	C. D. Michener	Adult Female	AMNH	G. Zhang	2012			GeoLocate Software
Other material	Zelus cervicalis	Stål, 1872	UCR_ENT 00017017	Reduviidae	Zelus	cervicalis	USA	Mississippi	Warren	Vicksburg	32.3525	-90.8778	1963-06-26	A. R. Moldenke. J. A. Woods	Adult Female	AMNH	G. Zhang	2012			GeoLocate Software
Other material	Zelus cervicalis	Stål, 1872	UCR_ENT 00017018	Reduviidae	Zelus	cervicalis	USA	North Carolina	Wake	Raleigh	35.7719	-78.6389	1906-04-01 to 1906-05-31	Unknown	Adult Female	AMNH	G. Zhang	2012
Other material	Zelus cervicalis	Stål, 1872	UCR_ENT 00017019	Reduviidae	Zelus	cervicalis	USA	North Carolina	Wake	Raleigh	35.7719	-78.6389	1906-04-01 to 1906-05-31	Unknown	Adult Female	AMNH	G. Zhang	2012
Other material	Zelus cervicalis	Stål, 1872	UCR_ENT 00017020	Reduviidae	Zelus	cervicalis	COSTA RICA	Guanacaste	none	6 mi S, 6 mi E Canas, Taboga	10.3167	-85.15	1967-02-13 to 1967-02-18	J. A. Slater	Adult Male	AMNH	G. Zhang	2012			Label
Other material	Zelus cervicalis	Stål, 1872	UCR_ENT 00017021	Reduviidae	Zelus	cervicalis	COLOMBIA	Magdalena	none	Valledupar (note: there is another, larger Valledupar in Cesar Prov.)	10.4167	-73.5833	1968-07-11 to 1968-07-13	Borys Malkin	Adult Female	AMNH	G. Zhang	2012			GeoLocate Software
Other material	Zelus cervicalis	Stål, 1872	UCR_ENT 00017022	Reduviidae	Zelus	cervicalis	COLOMBIA	Magdalena	none	Valledupar (note: there is another, larger Valledupar in Cesar Prov.)	10.4167	-73.5833	1968-07-11 to 1968-07-13	Borys Malkin	Adult Female	AMNH	G. Zhang	2012			GeoLocate Software
Other material	Zelus cervicalis	Stål, 1872	UCR_ENT 00017023	Reduviidae	Zelus	cervicalis	GUATEMALA	Guatemala	none	Amatitlan	14.4875	-90.6153	1947-07-06	P. & C. Vaurie	Adult Female	AMNH	G. Zhang	2012			Gazetteer	1219 m
Other material	Zelus cervicalis	Stål, 1872	UCR_ENT 00017024	Reduviidae	Zelus	cervicalis	EL SALVADOR	La Libertad	none	Santa Tecla	13.6769	-89.2797	1951-02-01	J. Vincent	Adult Female	AMNH	G. Zhang	2012
Other material	Zelus cervicalis	Stål, 1872	UCR_ENT 00017025	Reduviidae	Zelus	cervicalis	HONDURAS	Comayagua	none	Minas de Oro	14.8	-87.35	1700-06-01	J. B. Edwards	Adult Female	AMNH	G. Zhang	2012			Gazetteer	1219 m
Other material	Zelus cervicalis	Stål, 1872	UCR_ENT 00017026	Reduviidae	Zelus	cervicalis	MEXICO	Yucatan	None or Unknown	Cordeleria Mayapan	20.467	-89.214	1952-08-03	J. & D. Pallister	Adult Male	AMNH	G. Zhang	2012			Google Earth	23 m
Other material	Zelus cervicalis	Stål, 1872	UCR_ENT 00017027	Reduviidae	Zelus	cervicalis	MEXICO	Campeche	None or Unknown	Champoton	19.35	-90.7167	1964-07-08	J. C. and D. Pallister	Adult Male	AMNH	G. Zhang	2012
Other material	Zelus cervicalis	Stål, 1872	UCR_ENT 00017028	Reduviidae	Zelus	cervicalis	MEXICO	Yucatan	None or Unknown	Chichen Itza	20.6667	-88.5667	1952-07-16	J. & D. Pallister	Adult Male	AMNH	G. Zhang	2012
Other material	Zelus cervicalis	Stål, 1872	UCR_ENT 00017029	Reduviidae	Zelus	cervicalis	MEXICO	Nayarit	None or Unknown	San Blas	21.5333	-104.933	1963-12-18	C. W. O'Brien	Adult Male	AMNH	G. Zhang	2012
Other material	Zelus cervicalis	Stål, 1872	UCR_ENT 00017030	Reduviidae	Zelus	cervicalis	MEXICO	Nayarit	None or Unknown	Tepic	21.5	-104.9	1905-08-22	P. H. Goldsmith	Adult Male	AMNH	G. Zhang	2012			GeoLocate Software
Other material	Zelus cervicalis	Stål, 1872	UCR_ENT 00017031	Reduviidae	Zelus	cervicalis	MEXICO	Campeche	None or Unknown	10 mi N Hopelchen	19.8928	-89.8425	1962-04-16	F. D. Parker and L. A. Stange	Adult Female	AMNH	G. Zhang	2012			Google Earth
Other material	Zelus cervicalis	Stål, 1872	UCR_ENT 00046981	Reduviidae	Zelus	cervicalis	HONDURAS	Comayagua	none	3 km SE Siguatepeque	14.5633	-87.8276	1977-07-14	C & L O'Brien & Marshall	Adult Male	AMNH	G. Zhang	2012			Google Earth
Other material	Zelus cervicalis	Stål, 1872	UCR_ENT 00048763	Reduviidae	Zelus	cervicalis	MEXICO	Guerrero	None or Unknown	Chilpancingo	17.55	-99.5	No date provided	H. H. Smith	Adult Male	BMNH			Holotype of Zelus pictipes Champion, 1898. Verbatim label info: Type / B.C.A. Rhyn.II. Zelus pictipes, Ch. / Sp. figured. / Chilpancingo, Guerrero, 4600 ft. Oct. H.H.Smith / Lectotype Zelus pictipes Champion des. by E.R. Hart / Zelus cervicalis Stal det. E.R. Hart 1972			1402 m
Other material	Zelus cervicalis	Stål, 1872	UCR_ENT 00019655	Reduviidae	Zelus	cervicalis	USA	Florida	Pinellas	Gulfport	27.7484	-82.7034	no date provided	A. G. Reynolds	Adult Male	CAS	G. Zhang	2012			Gazetteer
Other material	Zelus cervicalis	Stål, 1872	UCR_ENT 00019656	Reduviidae	Zelus	cervicalis	USA	Florida	Leon	Tallahassee	30.4383	-84.2807	1903-08-08	Parshley	Adult Male	CAS	G. Zhang	2012			Gazetteer
Other material	Zelus cervicalis	Stål, 1872	UCR_ENT 00019670	Reduviidae	Zelus	cervicalis	USA	Florida	Putnam	Crescent City	29.43	-81.5108	1908-04-01	Van Duzee	Adult Male	CAS	G. Zhang	2012			Gazetteer
Other material	Zelus cervicalis	Stål, 1872	UCR_ENT 00019671	Reduviidae	Zelus	cervicalis	USA	Florida	Putnam	Crescent City	29.43	-81.5108	1908-04-01	Van Duzee	Adult Male	CAS	G. Zhang	2012			Gazetteer
Other material	Zelus cervicalis	Stål, 1872	UCR_ENT 00019672	Reduviidae	Zelus	cervicalis	USA	Florida	Marion	Seven Oaks	29.2519	-82.1158	1908-05-01	E. P. Van Duzee	Adult Male	CAS	G. Zhang	2012
Other material	Zelus cervicalis	Stål, 1872	UCR_ENT 00019673	Reduviidae	Zelus	cervicalis	USA	Arizona	Cochise	Douglas	31.3444	-109.545	August	F. H. Snow	Adult Female	CAS	G. Zhang	2012
Other material	Zelus cervicalis	Stål, 1872	UCR_ENT 00019676	Reduviidae	Zelus	cervicalis	USA	Mississippi	Union	Agricultural College			1915-11-06	Parshley	Adult Female	CAS	G. Zhang	2012
Other material	Zelus cervicalis	Stål, 1872	UCR_ENT 00019677	Reduviidae	Zelus	cervicalis	USA	Florida	Seminole	Sanford	28.8006	-81.2731	1908-04-25	Van Duzee	Adult Female	CAS	G. Zhang	2012			GeoLocate Software
Other material	Zelus cervicalis	Stål, 1872	UCR_ENT 00019678	Reduviidae	Zelus	cervicalis	USA	Florida	Putnam	Crescent City	29.43	-81.5108	1908-04-01	Van Duzee	Adult Female	CAS	G. Zhang	2012			Gazetteer
Other material	Zelus cervicalis	Stål, 1872	UCR_ENT 00019679	Reduviidae	Zelus	cervicalis	USA	Florida	Putnam	Crescent City	29.43	-81.5108	1908-04-01	Van Duzee	Adult Female	CAS	G. Zhang	2012			Gazetteer
Other material	Zelus cervicalis	Stål, 1872	UCR_ENT 00019720	Reduviidae	Zelus	cervicalis	MEXICO	Jalisco	None or Unknown	Guadalajara	20.6667	-103.333	no date provided	McConnell	Adult Male	CAS	G. Zhang	2012			GeoLocate Software
Other material	Zelus cervicalis	Stål, 1872	UCR_ENT 00019721	Reduviidae	Zelus	cervicalis	MEXICO	Jalisco	None or Unknown	Guadalajara	20.6667	-103.333	no date provided	McConnell	Adult Male	CAS	G. Zhang	2012			GeoLocate Software
Other material	Zelus cervicalis	Stål, 1872	UCR_ENT 00019722	Reduviidae	Zelus	cervicalis	MEXICO	Jalisco	None or Unknown	Guadalajara	20.6667	-103.333	no date provided	McConnell	Adult Male	CAS	G. Zhang	2012			GeoLocate Software
Other material	Zelus cervicalis	Stål, 1872	UCR_ENT 00019723	Reduviidae	Zelus	cervicalis	MEXICO	Jalisco	None or Unknown	Guadalajara	20.6667	-103.333	no date provided	McConnell	Adult Male	CAS	G. Zhang	2012			GeoLocate Software
Other material	Zelus cervicalis	Stål, 1872	UCR_ENT 00019724	Reduviidae	Zelus	cervicalis	MEXICO	Jalisco	None or Unknown	Guadalajara	20.6667	-103.333	no date provided	McConnell	Adult Male	CAS	G. Zhang	2012			GeoLocate Software
Other material	Zelus cervicalis	Stål, 1872	UCR_ENT 00019725	Reduviidae	Zelus	cervicalis	MEXICO	Jalisco	None or Unknown	Guadalajara	20.6667	-103.333	no date provided	McConnell	Adult Male	CAS	G. Zhang	2012			GeoLocate Software
Other material	Zelus cervicalis	Stål, 1872	UCR_ENT 00019726	Reduviidae	Zelus	cervicalis	MEXICO	Jalisco	None or Unknown	Guadalajara	20.6667	-103.333	no date provided	McConnell	Adult Male	CAS	G. Zhang	2012			GeoLocate Software
Other material	Zelus cervicalis	Stål, 1872	UCR_ENT 00019727	Reduviidae	Zelus	cervicalis	MEXICO	Jalisco	None or Unknown	Guadalajara	20.6667	-103.333	no date provided	McConnell	Adult Female	CAS	G. Zhang	2012			GeoLocate Software
Other material	Zelus cervicalis	Stål, 1872	UCR_ENT 00019728	Reduviidae	Zelus	cervicalis	MEXICO	Jalisco	None or Unknown	Guadalajara	20.6667	-103.333	no date provided	McConnell	Adult Female	CAS	G. Zhang	2012			GeoLocate Software
Other material	Zelus cervicalis	Stål, 1872	UCR_ENT 00019729	Reduviidae	Zelus	cervicalis	MEXICO	Jalisco	None or Unknown	Guadalajara	20.6667	-103.333	no date provided	McConnell	Adult Female	CAS	G. Zhang	2012			GeoLocate Software
Other material	Zelus cervicalis	Stål, 1872	UCR_ENT 00019730	Reduviidae	Zelus	cervicalis	USA	Georgia	Clayton	Clayton	34.88	-83.4	1940-04-05	Van Dyke	Adult Female	CAS	G. Zhang	2012			GeoLocate Software
Other material	Zelus cervicalis	Stål, 1872	UCR_ENT 00019731	Reduviidae	Zelus	cervicalis	MEXICO	Chiapas	None or Unknown	Municipio de Villa de Corgo, above Colonia Vicente on road from Guerrero to Finca Custepec	16.1667	-93.25	1981-08-10	D. E. Breedlove	Adult Female	CAS	G. Zhang	2012			Gazetteer	914 m
Other material	Zelus cervicalis	Stål, 1872	UCR_ENT 00019732	Reduviidae	Zelus	cervicalis	MEXICO	Jalisco	None or Unknown	Guadalajara	20.6667	-103.333	no date provided	McConnell	Adult Female	CAS	G. Zhang	2012			GeoLocate Software
Other material	Zelus cervicalis	Stål, 1872	UCR_ENT 00019733	Reduviidae	Zelus	cervicalis	MEXICO	Jalisco	None or Unknown	Guadalajara	20.6667	-103.333	no date provided	McConnell	Adult Female	CAS	G. Zhang	2012			GeoLocate Software
Other material	Zelus cervicalis	Stål, 1872	UCR_ENT 00019734	Reduviidae	Zelus	cervicalis	MEXICO	Jalisco	None or Unknown	Guadalajara	20.6667	-103.333	no date provided	McConnell	Adult Female	CAS	G. Zhang	2012			GeoLocate Software
Other material	Zelus cervicalis	Stål, 1872	UCR_ENT 00019735	Reduviidae	Zelus	cervicalis	USA	Arkansas	Hempstead	Hope	33.6669	-93.5914	1954-06-11	J. W. Green	Adult Male	CAS	G. Zhang	2012			Gazetteer
Other material	Zelus cervicalis	Stål, 1872	UCR_ENT 00019736	Reduviidae	Zelus	cervicalis	MEXICO	Nayarit	None or Unknown	Rio de las Canyas, 8 mi NW Acaponeta	22.5757	-105.45	1948-11-25	E. S. Ross	Adult Male	CAS	G. Zhang	2012			Google Earth
Other material	Zelus cervicalis	Stål, 1872	UCR_ENT 00019737	Reduviidae	Zelus	cervicalis	MEXICO	Jalisco	None or Unknown	8 mi S Guadalajara	20.5569	-103.344	1954-09-01	F. X. Williams	Adult Male	CAS	G. Zhang	2012			Google Earth
Other material	Zelus cervicalis	Stål, 1872	UCR_ENT 00019738	Reduviidae	Zelus	cervicalis	GUATEMALA	Sololß	none	Panajachel	14.5357	-91.5034	1963-08-19	D. Q. Cavagnaro & M. E. Irwin	Adult Male	CAS	G. Zhang	2012			Google Earth
Other material	Zelus cervicalis	Stål, 1872	UCR_ENT 00019739	Reduviidae	Zelus	cervicalis	GUATEMALA	Escuintla	none	Nueva Concepcion	14.2	-91.3	1963-08-17	D. A. Cavagnaro & M. E. Irwin	Adult Male	CAS	G. Zhang	2012			Gazetteer	50 m
Other material	Zelus cervicalis	Stål, 1872	UCR_ENT 00019740	Reduviidae	Zelus	cervicalis	GUATEMALA	Escuintla	none	Nueva Concepcion	14.2	-91.3	1963-08-17	D. A. Cavagnaro & M. E. Irwin	Adult Female	CAS	G. Zhang	2012			Gazetteer	50 m
Other material	Zelus cervicalis	Stål, 1872	UCR_ENT 00042735	Reduviidae	Zelus	cervicalis	USA	Oklahoma	Comanche	Ketch Lake, Fort Sill, West Range	34.7055	-98.5911	2006-06-12	B. Kondratieff, R. Younghang	Adult Male	CSUC	G. Zhang	2012			Google Earth
Other material	Zelus cervicalis	Stål, 1872	UCR_ENT 00042736	Reduviidae	Zelus	cervicalis	USA	Oklahoma	Comanche	Fort Sill, East Range E Cache Creek S Bound Road	34.6429	-98.3605	2005-09-18	B. Kondratieff & L. Myers	Adult Male	CSUC	G. Zhang	2012			Publication
Other material	Zelus cervicalis	Stål, 1872	UCR_ENT 00042737	Reduviidae	Zelus	cervicalis	USA	Texas	Bandera	FR 337 W Medina	29.799	-99.2941	2004-04-03	B. Kondratieff, R. Zuellig, R. F. Kirchner	Adult Male	CSUC	G. Zhang	2012			Google Earth
Other material	Zelus cervicalis	Stål, 1872	UCR_ENT 00042738	Reduviidae	Zelus	cervicalis	USA	Florida	Brevard	Palm Bay Regional Park	28.0077	-80.7333	2009-07-24	J. Schmidt, J. Owens	Adult Male	CSUC	G. Zhang	2012			Google Earth
Other material	Zelus cervicalis	Stål, 1872	UCR_ENT 00042739	Reduviidae	Zelus	cervicalis	USA	Florida	Brevard	Palm Bay Regional Park	28.0077	-80.7333	2009-07-24	J. Schmidt, J. Owens	Adult Female	CSUC	G. Zhang	2012			Google Earth
Other material	Zelus cervicalis	Stål, 1872	UCR_ENT 00042740	Reduviidae	Zelus	cervicalis	USA	Oklahoma	Comanche	Fort Sill, East Range Quonsett	34.7476	-98.345	2004-07-10	B. Kondratieff, J. Schmidt	Adult Female	CSUC	G. Zhang	2012			Publication
Other material	Zelus cervicalis	Stål, 1872	UCR_ENT 00042741	Reduviidae	Zelus	cervicalis	USA	Texas	Kinney	W Nueces River, Hwy 334, NE Bracketville	29.5611	-100.314	1992-06-13	B. Kondratieff, R. Baumann	Adult Female	CSUC	G. Zhang	2012			Google Earth
Other material	Zelus cervicalis	Stål, 1872	UCR_ENT 00042742	Reduviidae	Zelus	cervicalis	USA	Florida	Sarasota	Siesta Key	27.2739	-82.5534	1979-11-23	S.E. Larsen	Adult Female	CSUC	G. Zhang	2012			Google Earth
Other material	Zelus cervicalis	Stål, 1872	UCR_ENT 00042743	Reduviidae	Zelus	cervicalis	USA	Texas	Cameron	Cameron County	26.1167	-97.5167	1961-09-13	R.B. Eads	Adult Female	CSUC	G. Zhang	2012
Other material	Zelus cervicalis	Stål, 1872	UCR_ENT 00003905	Reduviidae	Zelus	cervicalis	USA	Alabama	Clarke	Thomasville	31.9135	-87.7358	1917-06-10	Unknown	Adult Male	CUIC	G. Zhang	2012			Gazetteer
Other material	Zelus cervicalis	Stål, 1872	UCR_ENT 00038991	Reduviidae	Zelus	cervicalis	USA	Georgia	Ware	Okefenokee Swamp, Billy's Island	30.6667	-82.3331	1912-06-15	Unknown	Adult sex unknown	CUIC	G. Zhang	2012	Additional label(s) read(s): Lot 462 Sub. 52		Gazetteer	37 m
Other material	Zelus cervicalis	Stål, 1872	UCR_ENT 00038992	Reduviidae	Zelus	cervicalis	USA	Georgia	Decatur	Spring Creek	30.8555	-84.5844	1912-07-16 to 1912-07-29	Unknown	Adult sex unknown	CUIC	G. Zhang	2012	Additional label(s) read(s): Lot 462 Sub. 52		Gazetteer
Other material	Zelus cervicalis	Stål, 1872	UCR_ENT 00038993	Reduviidae	Zelus	cervicalis	USA	Georgia	Decatur	Spring Creek	30.8555	-84.5844	1916-05-18 to 1916-05-21	J. C. Bradley	Adult sex unknown	CUIC	G. Zhang	2012	Additional label(s) read(s): Lot 801 Sub. 54		Gazetteer
Other material	Zelus cervicalis	Stål, 1872	UCR_ENT 00039050	Reduviidae	Zelus	cervicalis	USA	Georgia	Decatur	Spring Creek	30.8555	-84.5844	1916-05-01	J. C. Bradley	Adult Male	CUIC	G. Zhang	2012			Gazetteer
Other material	Zelus cervicalis	Stål, 1872	UCR_ENT 00039051	Reduviidae	Zelus	cervicalis	USA	Georgia	Decatur	Spring Creek	30.8555	-84.5844	1912-07-16	Unknown	Adult Male	CUIC	G. Zhang	2012			Gazetteer
Other material	Zelus cervicalis	Stål, 1872	UCR_ENT 00039052	Reduviidae	Zelus	cervicalis	USA	Georgia	Charlton	Okefenokee Swamp, Billy's Swamp	30.8049	-82.3401	1912-06-01	Unknown	Adult Male	CUIC	G. Zhang	2012			Google Earth
Other material	Zelus cervicalis	Stål, 1872	UCR_ENT 00039053	Reduviidae	Zelus	cervicalis	USA	Georgia	Charlton	Okefenokee Swamp, Billy's Swamp	30.8049	-82.3401	1912-06-01	Unknown	Adult Male	CUIC	G. Zhang	2012			Google Earth
Other material	Zelus cervicalis	Stål, 1872	UCR_ENT 00039054	Reduviidae	Zelus	cervicalis	USA	Alabama	Clarke	Thomasville	31.9135	-87.7358	1917-06-10	Unknown	Adult Male	CUIC	G. Zhang	2012			Gazetteer
Other material	Zelus cervicalis	Stål, 1872	UCR_ENT 00039055	Reduviidae	Zelus	cervicalis	USA	Florida	Hillsborough	Tampa	27.9472	-82.4586	1928-04-23	P.W.Fattig	Adult Male	CUIC	G. Zhang	2012
Other material	Zelus cervicalis	Stål, 1872	UCR_ENT 00039056	Reduviidae	Zelus	cervicalis	USA	Florida	Pinellas	Dunedin	28	-82	1930-10-23	W.S. Blatchley	Adult Male	CUIC	G. Zhang	2012			Label
Other material	Zelus cervicalis	Stål, 1872	UCR_ENT 00039057	Reduviidae	Zelus	cervicalis	USA	Florida	Pinellas	Dunedin	28	-82	1930-10-23	W.S. Blatchley	Adult Male	CUIC	G. Zhang	2012			Label
Other material	Zelus cervicalis	Stål, 1872	UCR_ENT 00039058	Reduviidae	Zelus	cervicalis	USA	Florida	Pinellas	Dunedin	28	-82	1930-10-23	W.S. Blatchley	Adult Male	CUIC	G. Zhang	2012			Label
Other material	Zelus cervicalis	Stål, 1872	UCR_ENT 00039059	Reduviidae	Zelus	cervicalis	USA	Florida	Marion	Ocala National Forest	29.2577	-81.7787	1938-08-29	Unknown	Adult Male	CUIC	G. Zhang	2012			Google Earth
Other material	Zelus cervicalis	Stål, 1872	UCR_ENT 00039060	Reduviidae	Zelus	cervicalis	USA	Florida	Lake	2mi W Tavares	28.8042	-81.7256	1994-07-18	Unknown	Adult Male	CUIC	G. Zhang	2012			Gazetteer
Other material	Zelus cervicalis	Stål, 1872	UCR_ENT 00039061	Reduviidae	Zelus	cervicalis	USA	Florida	Leon	Tallahassee	30.4383	-84.2807	1938-08-16	Unknown	Adult Female	CUIC	G. Zhang	2012			Gazetteer
Other material	Zelus cervicalis	Stål, 1872	UCR_ENT 00039063	Reduviidae	Zelus	cervicalis	USA	Florida	Pinellas	Dunedin	28	-82	1930-10-23	W. S. Blatchley	Adult Female	CUIC	G. Zhang	2012			Label
Other material	Zelus cervicalis	Stål, 1872	UCR_ENT 00039064	Reduviidae	Zelus	cervicalis	USA	Florida	Pinellas	Dunedin	28	-82	1930-10-23	W. S. Blatchley	Adult Female	CUIC	G. Zhang	2012			Label
Other material	Zelus cervicalis	Stål, 1872	UCR_ENT 00039065	Reduviidae	Zelus	cervicalis	USA	Florida	Pinellas	Dunedin	28	-82	1930-10-23	W. S. Blatchley	Adult Female	CUIC	G. Zhang	2012			Label
Other material	Zelus cervicalis	Stål, 1872	UCR_ENT 00039066	Reduviidae	Zelus	cervicalis	USA	Florida	unknown	E. Fla.			no date provided	Ashmead	Adult Female	CUIC	G. Zhang	2012
Other material	Zelus cervicalis	Stål, 1872	UCR_ENT 00039067	Reduviidae	Zelus	cervicalis	USA	Florida	Marion	Ocala National Forest	29.2577	-81.7787	1938-08-29	Unknown	Adult Female	CUIC	G. Zhang	2012			Google Earth
Other material	Zelus cervicalis	Stål, 1872	UCR_ENT 00039068	Reduviidae	Zelus	cervicalis	USA	Florida	unknown	E. Fla.			no date provided	Ashmead	Adult Female	CUIC	G. Zhang	2012
Other material	Zelus cervicalis	Stål, 1872	UCR_ENT 00039069	Reduviidae	Zelus	cervicalis	USA	Florida	Indian River	Indian River	27.6948	-80.5439	no date provided	Unknown	Adult Female	CUIC	G. Zhang	2012			Google Earth
Other material	Zelus cervicalis	Stål, 1872	UCR_ENT 00039070	Reduviidae	Zelus	cervicalis	USA	Florida	Lake	2mi W Tavares	28.8042	-81.7256	1994-07-18	Unknown	Adult Female	CUIC	G. Zhang	2012			Gazetteer
Other material	Zelus cervicalis	Stål, 1872	UCR_ENT 00039074	Reduviidae	Zelus	cervicalis	USA	Georgia	Charlton	Okefenokee Swamp, Billy's Swamp	30.8049	-82.3401	1912-06-01	Unknown	Adult Female	CUIC	G. Zhang	2012			Google Earth
Other material	Zelus cervicalis	Stål, 1872	UCR_ENT 00039075	Reduviidae	Zelus	cervicalis	USA	Georgia	Glynn	St. Simon's Island	31.168	-81.4206	1911-06-04	Unknown	Adult Female	CUIC	G. Zhang	2012			Google Earth
Other material	Zelus cervicalis	Stål, 1872	UCR_ENT 00039076	Reduviidae	Zelus	cervicalis	USA	Georgia	Decatur	Spring Creek	30.8555	-84.5844	1916-05-01	J. C. Bradley	Adult Female	CUIC	G. Zhang	2012			Gazetteer
Other material	Zelus cervicalis	Stål, 1872	UCR_ENT 00039077	Reduviidae	Zelus	cervicalis	USA	Georgia	Charlton	Okefenokee Swamp, Billy's Swamp	30.8049	-82.3401	1912-06-01	Unknown	Adult Female	CUIC	G. Zhang	2012			Google Earth
Other material	Zelus cervicalis	Stål, 1872	UCR_ENT 00039078	Reduviidae	Zelus	cervicalis	USA	Georgia	Charlton	Okefenokee Swamp, Billy's Swamp	30.8049	-82.3401	1912-06-01	Unknown	Adult Female	CUIC	G. Zhang	2012			Google Earth
Other material	Zelus cervicalis	Stål, 1872	UCR_ENT 00039079	Reduviidae	Zelus	cervicalis	USA	Georgia	Charlton	Okefenokee Swamp, Billy's Swamp	30.8049	-82.3401	1912-06-01	Unknown	Adult Female	CUIC	G. Zhang	2012			Google Earth
Other material	Zelus cervicalis	Stål, 1872	UCR_ENT 00039080	Reduviidae	Zelus	cervicalis	USA	Georgia	Charlton	Okefenokee Swamp, Billy's Swamp	30.8049	-82.3401	1912-06-01	Unknown	Adult Female	CUIC	G. Zhang	2012			Google Earth
Other material	Zelus cervicalis	Stål, 1872	UCR_ENT 00039081	Reduviidae	Zelus	cervicalis	USA	Georgia	Charlton	Okefenokee Swamp, Billy's Swamp	30.8049	-82.3401	1912-06-01	Unknown	Adult Female	CUIC	G. Zhang	2012			Google Earth
Other material	Zelus cervicalis	Stål, 1872	UCR_ENT 00039082	Reduviidae	Zelus	cervicalis	USA	Georgia	Charlton	Okefenokee Swamp, Billy's Swamp	30.8049	-82.3401	1912-06-01	Unknown	Adult Female	CUIC	G. Zhang	2012			Google Earth
Other material	Zelus cervicalis	Stål, 1872	UCR_ENT 00039083	Reduviidae	Zelus	cervicalis	USA	Arizona	unknown	unknown	34.1461	-111.47	no date provided	Unknown	Adult Female	CUIC	G. Zhang	2012			GeoLocate Software
Other material	Zelus cervicalis	Stål, 1872	UCR_ENT 00021658	Reduviidae	Zelus	cervicalis	USA	Florida	none	Saufley Hghts., 8-10 mi. N.E. of Pensacola	30.5502	-87.3215	1944-12-01	D.C. Lowrie	Adult Male	FMNH	G. Zhang	2012			Google Earth
Other material	Zelus cervicalis	Stål, 1872	UCR_ENT 00021659	Reduviidae	Zelus	cervicalis	USA	Florida	none	Saufley Hghts., 8-10 mi. N.E. of Pensacola	30.5502	-87.3215	1944-12-01	D.C. Lowrie	Adult Male	FMNH	G. Zhang	2012			Google Earth
Other material	Zelus cervicalis	Stål, 1872	UCR_ENT 00021660	Reduviidae	Zelus	cervicalis	USA	Alabama	Mobile	Mobile	30.6932	-88.0431	1910-09-03	H.P. Loding	Adult Female	FMNH	G. Zhang	2012			GeoLocate Software
Other material	Zelus cervicalis	Stål, 1872	UCR_ENT 00021661	Reduviidae	Zelus	cervicalis	USA	Alabama	Mobile	Mobile	30.6932	-88.0431	1910-09-03	H.P. Loding	Adult Female	FMNH	G. Zhang	2012			GeoLocate Software
Other material	Zelus cervicalis	Stål, 1872	UCR_ENT 00021662	Reduviidae	Zelus	cervicalis	USA	Alabama	Mobile	Mobile	30.6932	-88.0431	1910-09-03	H.P. Loding	Adult Female	FMNH	G. Zhang	2012			GeoLocate Software
Other material	Zelus cervicalis	Stål, 1872	UCR_ENT 00021663	Reduviidae	Zelus	cervicalis	USA	Alabama	Mobile	Mobile	30.6932	-88.0431	1911-04-20	H.P. Loding	Adult Female	FMNH	G. Zhang	2012			GeoLocate Software
Other material	Zelus cervicalis	Stål, 1872	UCR_ENT 00021664	Reduviidae	Zelus	cervicalis	USA	Alabama	Mobile	Mobile	30.6932	-88.0431	1911-04-20	H.P. Loding	Adult Female	FMNH	G. Zhang	2012			GeoLocate Software
Other material	Zelus cervicalis	Stål, 1872	UCR_ENT 00021665	Reduviidae	Zelus	cervicalis	USA	Alabama	none	Spring Hill			1912-06-11	H.P. Loding	Adult Female	FMNH	G. Zhang	2012
Other material	Zelus cervicalis	Stål, 1872	UCR_ENT 00021666	Reduviidae	Zelus	cervicalis	USA	Alabama	Clarke	Bassett's Creek	31.7625	-87.7144	1949-08-17	Henry S.Dybas	Adult Female	FMNH	G. Zhang	2012			Google Earth
Other material	Zelus cervicalis	Stål, 1872	UCR_ENT 00011909	Reduviidae	Zelus	cervicalis	USA	Florida	Glades	NW of Lake Okeechobee	27.064	-80.976	2002-11-01	J.C. Dunford and D.T. Almquist	Adult Female	FSCA	G. Zhang	2012		Sweep Netting	Label
Other material	Zelus cervicalis	Stål, 1872	UCR_ENT 00025734	Reduviidae	Zelus	cervicalis	MEXICO	Mexico	None or Unknown	Km 5 carr Tonatico- La Audiencia	18.8147	-99.6359	2003-03-12	H. Brailovsky and E. Barrera	Adult Male	IBUNAM	G. Zhang	2012			Google Earth
Other material	Zelus cervicalis	Stål, 1872	UCR_ENT 00025735	Reduviidae	Zelus	cervicalis	MEXICO	Jalisco	None or Unknown	Las Guasimas, km 8 Cam, Al Tuito-Chacala	20.3667	-105.367	1991-11-25	E. Ramirez & J. Villa	Adult Male	IBUNAM	G. Zhang	2012			Gazetteer
Other material	Zelus cervicalis	Stål, 1872	UCR_ENT 00025736	Reduviidae	Zelus	cervicalis	MEXICO	Oaxaca	None or Unknown	San Lorenzo Albarradas Municipio El Camaron	16.9222	-96.2578	2000-03-04	E. Barrera & A. Ibarra	Adult Male	IBUNAM	G. Zhang	2012			Gazetteer	700 m
Other material	Zelus cervicalis	Stål, 1872	UCR_ENT 00025737	Reduviidae	Zelus	cervicalis	MEXICO	Nayarit	None or Unknown	P.H. Aguamilpa	21.8167	-104.675	1993-08-27	J. Bueno	Adult Male	IBUNAM	G. Zhang	2012			Gazetteer
Other material	Zelus cervicalis	Stål, 1872	UCR_ENT 00025738	Reduviidae	Zelus	cervicalis	MEXICO	Zacatecas	None or Unknown	Entre Francisco l Madero y Vasco de Quiroga	23.5111	-103.638	2005-10-26	R. Marino	Adult Male	IBUNAM	G. Zhang	2012			Label	2400 m
Other material	Zelus cervicalis	Stål, 1872	UCR_ENT 00025739	Reduviidae	Zelus	cervicalis	MEXICO	Morelos	None or Unknown	Tepoztlan	18.985	-99.1	2007-02-25	E. Marino	Adult Male	IBUNAM	G. Zhang	2012			Google Earth
Other material	Zelus cervicalis	Stål, 1872	UCR_ENT 00025740	Reduviidae	Zelus	cervicalis	MEXICO	Chiapas	None or Unknown	Bonampak	16.7333	-91.0833	1978-05-02	H. Brailovsky	Adult Male	IBUNAM	G. Zhang	2012			Gazetteer
Other material	Zelus cervicalis	Stål, 1872	UCR_ENT 00025741	Reduviidae	Zelus	cervicalis	MEXICO	Oaxaca	None or Unknown	Dominguillo	17.6485	-96.9117	1998-09-22	S. Zaragoza	Adult Male	IBUNAM	G. Zhang	2012			Label	760 m
Other material	Zelus cervicalis	Stål, 1872	UCR_ENT 00025742	Reduviidae	Zelus	cervicalis	MEXICO	Oaxaca	None or Unknown	San Lorenzo Albarradas Municipio El Camaron	16.9222	-96.2578	2000-03-04	E. Barrera & A. Ibarra	Adult Male	IBUNAM	G. Zhang	2012			Gazetteer	700 m
Other material	Zelus cervicalis	Stål, 1872	UCR_ENT 00025744	Reduviidae	Zelus	cervicalis	MEXICO	Veracruz	None or Unknown	Uetlae			1976-01-11	Unknown	Adult Male	IBUNAM	G. Zhang	2012
Other material	Zelus cervicalis	Stål, 1872	UCR_ENT 00025745	Reduviidae	Zelus	cervicalis	MEXICO	Chiapas	None or Unknown	km 20 on the road from Tapachula to Puerto Madero	14.9296	-92.4453	1985-08-31	H. Velazco	Adult Male	IBUNAM	G. Zhang	2012			Google Earth
Other material	Zelus cervicalis	Stål, 1872	UCR_ENT 00025747	Reduviidae	Zelus	cervicalis	MEXICO	Puebla	None or Unknown	Cacaloapan	18.5667	-97.6	1994-03-17	C. Mayorga & E. Barrera	Adult Male	IBUNAM	G. Zhang	2012			Gazetteer	2013 m
Other material	Zelus cervicalis	Stål, 1872	UCR_ENT 00025748	Reduviidae	Zelus	cervicalis	MEXICO	Queretaro	None or Unknown	Ciuadad de Queretaro	20.6	-100.383	2009-01-05	H. Brailovsky	Adult Male	IBUNAM	G. Zhang	2012			Gazetteer
Other material	Zelus cervicalis	Stål, 1872	UCR_ENT 00025749	Reduviidae	Zelus	cervicalis	MEXICO	Guerrero	None or Unknown	El Ocotito, km 5a Tiahui-zapa	17.2706	-99.56	2005-11-10	L. Cervantes	Adult Female	IBUNAM	G. Zhang	2012			Label	695 m
Other material	Zelus cervicalis	Stål, 1872	UCR_ENT 00025750	Reduviidae	Zelus	cervicalis	MEXICO	San Luis Potosi	None or Unknown	Tierra Quemada km. 143 Carr. Queretarro- San Luis Potosi	21.6844	-100.697	2006-08-02	H. Brailovsky and E. Barrera	Adult Female	IBUNAM	G. Zhang	2012			Label	1800 m
Other material	Zelus cervicalis	Stål, 1872	UCR_ENT 00025751	Reduviidae	Zelus	cervicalis	MEXICO	Puebla	None or Unknown	Santa Lucia, Atlixco	18.8833	-98.3528	1972-02-07	H. Brailovsky	Adult Female	IBUNAM	G. Zhang	2012			Gazetteer	2097 m
Other material	Zelus cervicalis	Stål, 1872	UCR_ENT 00025752	Reduviidae	Zelus	cervicalis	MEXICO	Hidalgo	None or Unknown	Rio Suchiate	14.55	-92.25	1985-03-20	M. Vertiz	Adult Female	IBUNAM	G. Zhang	2012			Gazetteer
Other material	Zelus cervicalis	Stål, 1872	UCR_ENT 00025753	Reduviidae	Zelus	cervicalis	MEXICO	Guanajuato	None or Unknown	Dolores Hidalgo km 56 Juventino Rosas	20.9828	-100.985	2007-04-20	E. Barrera & L. Cervantes	Adult Female	IBUNAM	G. Zhang	2012			Label	2150 m
Other material	Zelus cervicalis	Stål, 1872	UCR_ENT 00025754	Reduviidae	Zelus	cervicalis	MEXICO	Guerrero	None or Unknown	Omilteme	17.5	-99.6667	1982-11-25	M. Garcia	Adult Female	IBUNAM	G. Zhang	2012				2438 m
Other material	Zelus cervicalis	Stål, 1872	UCR_ENT 00025755	Reduviidae	Zelus	cervicalis	MEXICO	Puebla	None or Unknown	Chiautla	18.2833	-98.6	1986-12-12	H. Brailovsky	Adult Female	IBUNAM	G. Zhang	2012			Gazetteer	998 m
Other material	Zelus cervicalis	Stål, 1872	UCR_ENT 00025756	Reduviidae	Zelus	cervicalis	MEXICO	Mexico	None or Unknown	6 km al E de San Simon de Guerrer, Mpio de Temascaltepec	19.1092	-99.9789	2005-10-20	R. Marino, C. Dietrich	Adult Female	IBUNAM	G. Zhang	2012			Label	2250 m
Other material	Zelus cervicalis	Stål, 1872	UCR_ENT 00025757	Reduviidae	Zelus	cervicalis	MEXICO	Guerrero	None or Unknown	Tecpan de Galeana	17.25	-100.683	1971-07-10	Unknown	Adult Female	IBUNAM	G. Zhang	2012			Gazetteer
Other material	Zelus cervicalis	Stål, 1872	UCR_ENT 00025758	Reduviidae	Zelus	cervicalis	MEXICO	Guerrero	None or Unknown	Km 7 S de la Concepcion	18.7433	-99.685	2003-11-20	T.J. Henry, H. Brailovsky and L. Cervantes	Adult Female	IBUNAM	G. Zhang	2012			Label	1475 m
Other material	Zelus cervicalis	Stål, 1872	UCR_ENT 00025759	Reduviidae	Zelus	cervicalis	MEXICO	Colima	None or Unknown	Manzanillo, Puente Los Adjuntas	19.05	-104.333	1988-11-02	J.L. Colin, A. Garcia, A. Cadena	Adult Female	IBUNAM	G. Zhang	2012			Gazetteer
Other material	Zelus cervicalis	Stål, 1872	UCR_ENT 00025760	Reduviidae	Zelus	cervicalis	MEXICO	Oaxaca	None or Unknown	Km 11 Carr. El Camaron-Tehuantepec	16.5474	-95.9679	2000-07-13	A. Ibarra, C. Mayorga, and E. Barrera	Adult Female	IBUNAM	G. Zhang	2012			Google Earth
Other material	Zelus cervicalis	Stål, 1872	UCR_ENT 00038813	Reduviidae	Zelus	cervicalis	MEXICO	Jalisco	None or Unknown	Chamela	19.4885	-105.044	1974-10-27	H. Brailovsky	Adult Female	IBUNAM	G. Zhang	2012			Google Earth	93 m
Other material	Zelus cervicalis	Stål, 1872	UCR_ENT 00014436	Reduviidae	Zelus	cervicalis	COSTA RICA	Guanacaste	none	Finca Jenny, 31 km N of Liberia	10.8653	-85.5742	1988-11-01	Unknown	Adult sex unknown	INBIO	G. Zhang	2012				300 m	INBIOCRI001017333
Other material	Zelus cervicalis	Stål, 1872	UCR_ENT 00069874	Reduviidae	Zelus	cervicalis	USA	Florida	unknown	Likely			1934-07-24	P. McKinstry	Adult Male	KU	G. Zhang	2012
Other material	Zelus cervicalis	Stål, 1872	UCR_ENT 00069875	Reduviidae	Zelus	cervicalis	USA	North Carolina	Pender	New Topsail Beach	34.3551	-77.6602	1963-09-02	P. D. Ashlock	Adult Male	KU	G. Zhang	2012			Google Earth
Other material	Zelus cervicalis	Stål, 1872	UCR_ENT 00069876	Reduviidae	Zelus	cervicalis	MEXICO	Tamaulipas	None or Unknown	Llera	23.3167	-99.0167	1988-12-29	R.L. Minckley & B.N. Danforth	Adult Male	KU	G. Zhang	2012			Google Earth
Other material	Zelus cervicalis	Stål, 1872	UCR_ENT 00069877	Reduviidae	Zelus	cervicalis	MEXICO	Morelos	None or Unknown	14 mi N Cuernavaca	19.0155	-99.1973	1963-07-30	G. W. Byers	Adult Male	KU	G. Zhang	2012			Google Earth	2225 m
Other material	Zelus cervicalis	Stål, 1872	UCR_ENT 00069878	Reduviidae	Zelus	cervicalis	MEXICO	Nayarit	None or Unknown	20 km S of San Blas	21.3622	-105.235	1994-04-07	R. J. McGinley	Adult Male	KU	G. Zhang	2012			Google Earth	10 m	SM0328821 KUNHM-ENT
Other material	Zelus cervicalis	Stål, 1872	UCR_ENT 00069879	Reduviidae	Zelus	cervicalis	MEXICO	Morelos	None or Unknown	7.3 mi S of Yautepec	18.786	-99.102	1962-08-16	Ordway & Naumann	Adult Female	KU	G. Zhang	2012			GeoLocate Software	914 m
Other material	Zelus cervicalis	Stål, 1872	UCR_ENT 00069880	Reduviidae	Zelus	cervicalis	USA	North Carolina	Guilford	Greensboro	36.0725	-79.7922	1959-08-27	P. D. Ashlock	Adult Female	KU	G. Zhang	2012			Gazetteer
Other material	Zelus cervicalis	Stål, 1872	UCR_ENT 00069881	Reduviidae	Zelus	cervicalis	USA	North Carolina	Brunswick	Ocean Isle Beach	33.8943	-78.4267	1960-07-09	P. D. Ashlock	Adult Female	KU	G. Zhang	2012			Google Earth
Other material	Zelus cervicalis	Stål, 1872	UCR_ENT 00069882	Reduviidae	Zelus	cervicalis	USA	Mississippi	Alcorn	Corinth	34.9342	-88.5222	1960-09-07	P. D. Ashlock	Adult Female	KU	G. Zhang	2012			GeoLocate Software
Other material	Zelus cervicalis	Stål, 1872	UCR_ENT 00069883	Reduviidae	Zelus	cervicalis	USA	Texas	Brazos	College Station	30.6278	-96.3342	1961-09-23	Student	Adult Female	KU	G. Zhang	2012
Other material	Zelus cervicalis	Stål, 1872	UCR_ENT 00069884	Reduviidae	Zelus	cervicalis	USA	Texas	Brazos	College Station	30.6278	-96.3342	1961-09-23	Student	Adult Female	KU	G. Zhang	2012
Other material	Zelus cervicalis	Stål, 1872	UCR_ENT 00010881	Reduviidae	Zelus	cervicalis	MEXICO	Nayarit	None or Unknown	6 m E of San Blas	21.5437	-105.191	1959-08-27	L. A. Stange, A. S. Menke	Adult Male	LACM	G. Zhang	2012			GeoLocate Software
Other material	Zelus cervicalis	Stål, 1872	UCR_ENT 00010882	Reduviidae	Zelus	cervicalis	USA	Alabama	Colbert	Wilson Dam	34.792	-87.6252	1953-07-15	R.X. Schick	Adult Male	LACM	G. Zhang	2012			Google Earth
Other material	Zelus cervicalis	Stål, 1872	UCR_ENT 00010883	Reduviidae	Zelus	cervicalis	USA	Alabama	Colbert	Wilson Dam	34.792	-87.6252	1953-07-15	R.X. Schick	Adult Male	LACM	G. Zhang	2012			Google Earth
Other material	Zelus cervicalis	Stål, 1872	UCR_ENT 00010884	Reduviidae	Zelus	cervicalis	USA	Alabama	Colbert	Wilson Dam	34.792	-87.6252	1953-07-15	R.X. Schick	Adult Male	LACM	G. Zhang	2012			Google Earth
Other material	Zelus cervicalis	Stål, 1872	UCR_ENT 00010885	Reduviidae	Zelus	cervicalis	USA	Tennessee	Benton	Camden	36.0589	-88.0978	1953-08-22	R.X. Schick	Adult Male	LACM	G. Zhang	2012			Gazetteer	122 m
Other material	Zelus cervicalis	Stål, 1872	UCR_ENT 00010886	Reduviidae	Zelus	cervicalis	USA	Tennessee	Benton	Camden	36.0589	-88.0978	1953-08-22	R.X. Schick	Adult Male	LACM	G. Zhang	2012			Gazetteer	122 m
Other material	Zelus cervicalis	Stål, 1872	UCR_ENT 00010887	Reduviidae	Zelus	cervicalis	USA	Tennessee	Benton	Camden	36.0589	-88.0978	1953-08-22	R.X. Schick	Adult Male	LACM	G. Zhang	2012			Gazetteer	122 m
Other material	Zelus cervicalis	Stål, 1872	UCR_ENT 00010888	Reduviidae	Zelus	cervicalis	MEXICO	Sonora	None or Unknown	Minas Nuevas near Alamos	27.0583	-109.003	1959-08-27	R. L. Westcott	Adult Male	LACM	G. Zhang	2012			Google Earth
Other material	Zelus cervicalis	Stål, 1872	UCR_ENT 00010889	Reduviidae	Zelus	cervicalis	MEXICO	Sonora	Alamos	Guirocoba	26.9031	-108.697	1959-09-11	Unknown	Adult Male	LACM	G. Zhang	2012			GeoLocate Software
Other material	Zelus cervicalis	Stål, 1872	UCR_ENT 00010890	Reduviidae	Zelus	cervicalis	MEXICO	Nayarit	None or Unknown	6 m E of Ixtlan del Rio			1958-12-30	Menke and Stage	Adult Female	LACM	G. Zhang	2012
Other material	Zelus cervicalis	Stål, 1872	UCR_ENT 00010891	Reduviidae	Zelus	cervicalis	MEXICO	Sonora	Alamos	Guirocoba	26.9031	-108.697	1933-07-25	Unknown	Adult Female	LACM	G. Zhang	2012			GeoLocate Software
Other material	Zelus cervicalis	Stål, 1872	UCR_ENT 00010892	Reduviidae	Zelus	cervicalis	MEXICO	Colima	None or Unknown	Manzanillo	19.05	-104.333	1956-07-28 to 1956-07-30	A. Lewis	Adult Female	LACM	G. Zhang	2012				95 m
Other material	Zelus cervicalis	Stål, 1872	UCR_ENT 00010893	Reduviidae	Zelus	cervicalis	USA	Tennessee	Benton	Camden	36.0589	-88.0978	1953-07-05	R.X. Schick	Adult Female	LACM	G. Zhang	2012			Gazetteer	122 m
Other material	Zelus cervicalis	Stål, 1872	UCR_ENT 00010894	Reduviidae	Zelus	cervicalis	USA	Tennessee	Benton	Camden	36.0589	-88.0978	1953-08-22	R.X. Schick	Adult Female	LACM	G. Zhang	2012			Gazetteer	122 m
Other material	Zelus cervicalis	Stål, 1872	UCR_ENT 00010895	Reduviidae	Zelus	cervicalis	USA	Tennessee	Benton	Camden	36.0589	-88.0978	1953-07-03	R.X. Schick	Adult Female	LACM	G. Zhang	2012			Gazetteer	122 m
Other material	Zelus cervicalis	Stål, 1872	UCR_ENT 00010896	Reduviidae	Zelus	cervicalis	USA	Georgia	Towns	Hiawassee	34.9492	-83.7575	1953-08-01	R.X. Schick	Adult Female	LACM	G. Zhang	2012
Other material	Zelus cervicalis	Stål, 1872	UCR_ENT 00010897	Reduviidae	Zelus	cervicalis	USA	Georgia	Towns	Hiawassee	34.9492	-83.7575	1953-08-01	R.X. Schick	Adult Female	LACM	G. Zhang	2012
Other material	Zelus cervicalis	Stål, 1872	UCR_ENT 00010898	Reduviidae	Zelus	cervicalis	USA	Mississippi	Tishomingo	Iuka	34.8118	-88.19	1953-08-01	R.X. Schick	Adult Female	LACM	G. Zhang	2012			Gazetteer
Other material	Zelus cervicalis	Stål, 1872	UCR_ENT 00022656	Reduviidae	Zelus	cervicalis	USA	Texas	Bexar	Fort Sam Houston	29.2711	-98.263	1974-06-14	M. Axtman	Adult Female	LACM	G. Zhang	2012				219 m	LACM ENT 264701
Other material	Zelus cervicalis	Stål, 1872	UCR_ENT 00023677	Reduviidae	Zelus	cervicalis	MEXICO	Oaxaca	None or Unknown	Jalapa	16.5	-95.4667	no date provided	Unknown	Adult Male	RMNH	G. Zhang	2012			Gazetteer
Other material	Zelus cervicalis	Stål, 1872	UCR_ENT 00023678	Reduviidae	Zelus	cervicalis	USA	Florida	Hillsborough	Hillsborough County	27.91	-82.35	1960-04-09	R. Herlita	Adult Male	RMNH	G. Zhang	2012
Other material	Zelus cervicalis	Stål, 1872	UCR_ENT 00023679	Reduviidae	Zelus	cervicalis	MEXICO	Veracruz	None or Unknown	Cordoba	18.8942	-96.9347	1963-05-15	C. & O. Epping	Adult Male	RMNH	G. Zhang	2012			Google Earth	850 m
Other material	Zelus cervicalis	Stål, 1872	UCR_ENT 00023680	Reduviidae	Zelus	cervicalis	USA	Florida	Alachua	Alachua County, unspecified locality	29.652	-82.325	1960-04-01	R.F.	Adult Male	RMNH	G. Zhang	2012			Google Earth
Other material	Zelus cervicalis	Stål, 1872	UCR_ENT 00023681	Reduviidae	Zelus	cervicalis	MEXICO	Oaxaca	None or Unknown	Loma Bonita	17.0542	-97.9458	1963-08-25	C. & O. Epping	Adult Female	RMNH	G. Zhang	2012			Gazetteer
Other material	Zelus cervicalis	Stål, 1872	UCR_ENT 00023682	Reduviidae	Zelus	cervicalis	USA	Florida	Hamilton	Hamilton County	30.49	-82.95	1960-05-04	F. Johnson	Adult Female	RMNH	G. Zhang	2012			Gazetteer
Other material	Zelus cervicalis	Stål, 1872	UCR_ENT 00025169	Reduviidae	Zelus	cervicalis	MEXICO	Sinaloa	None or Unknown	near casala, 25 mi off Highway 15			1967-09-25	Charles F. Harbison	Adult Female	SDNH
Other material	Zelus cervicalis	Stål, 1872	UCR_ENT 00032050	Reduviidae	Zelus	cervicalis	USA	Georgia	Lowndes	3 mi E Hahira	30.9907	-83.3213	1929-10-26	T. H. Hubbell	Adult Male	TAMU	G. Zhang	2012			Google Earth
Other material	Zelus cervicalis	Stål, 1872	UCR_ENT 00032051	Reduviidae	Zelus	cervicalis	USA	Georgia	Seminole	Roy's Lake, Dist 21, Lots 99 & 102			1953-06-10	T. H. Hubbell	Adult Male	TAMU	G. Zhang	2012
Other material	Zelus cervicalis	Stål, 1872	UCR_ENT 00032052	Reduviidae	Zelus	cervicalis	USA	Georgia	Bibb	Macon	32.8406	-83.6325	1924-04-06	T. H. Hubbell	Adult Male	TAMU	G. Zhang	2012			Gazetteer
Other material	Zelus cervicalis	Stål, 1872	UCR_ENT 00032053	Reduviidae	Zelus	cervicalis	USA	Georgia	Emanuel	7 mi N of Lyons	32.306	-82.3217	1929-11-02	T. H. Hubbell	Adult Female	TAMU	G. Zhang	2012			Google Earth
Other material	Zelus cervicalis	Stål, 1872	UCR_ENT 00032054	Reduviidae	Zelus	cervicalis	USA	Georgia	Seminole	High Pine, Dist. 21, Lot 143			1953-06-13	T. H. Hubbell	Adult Female	TAMU	G. Zhang	2012
Other material	Zelus cervicalis	Stål, 1872	UCR_ENT 00032055	Reduviidae	Zelus	cervicalis	USA	Georgia	Decatur	Dist. 21, Lot 337			1953-06-08	T. H. Hubbell	Adult Female	TAMU	G. Zhang	2012
Other material	Zelus cervicalis	Stål, 1872	UCR_ENT 00032062	Reduviidae	Zelus	cervicalis	USA	Louisiana	Winn	Winnfield	31.9254	-92.6396	1918-06-30	G. R. Pilate	Adult Male	TAMU	G. Zhang	2012			Gazetteer
Other material	Zelus cervicalis	Stål, 1872	UCR_ENT 00032063	Reduviidae	Zelus	cervicalis	USA	Louisiana	Acadia	Bates	30.4216	-92.3985	1951-10-03	Monroe	Adult Male	TAMU	G. Zhang	2012			Gazetteer
Other material	Zelus cervicalis	Stål, 1872	UCR_ENT 00032064	Reduviidae	Zelus	cervicalis	USA	Louisiana	East Baton Rouge	Baton Rouge	30.4506	-91.1544	1934-05-24	F. D. Lyman	Adult Female	TAMU	G. Zhang	2012
Other material	Zelus cervicalis	Stål, 1872	UCR_ENT 00032065	Reduviidae	Zelus	cervicalis	USA	Texas	Cameron	Brownsville	25.9014	-97.4972	1972-01-13	W. E. Clark	Adult Female	TAMU	G. Zhang	2012			GeoLocate Software
Other material	Zelus cervicalis	Stål, 1872	UCR_ENT 00032066	Reduviidae	Zelus	cervicalis	USA	Texas	Sabine	Sabine Natl. Forest, 2.9 mi S Yellowpine			1975-07-29	J. S. Ashe	Adult Female	TAMU	G. Zhang	2012
Other material	Zelus cervicalis	Stål, 1872	UCR_ENT 00032067	Reduviidae	Zelus	cervicalis	USA	Mississippi	Harrison	Handsboro	30.3985	-89.027	1944-08-18	P. Brodkorb	Adult Male	TAMU	G. Zhang	2012			Gazetteer
Other material	Zelus cervicalis	Stål, 1872	UCR_ENT 00032068	Reduviidae	Zelus	cervicalis	USA	Mississippi	Jones	Laurel	31.6939	-89.1306	1924-09-06	Unknown	Adult Female	TAMU	G. Zhang	2012			GeoLocate Software
Other material	Zelus cervicalis	Stål, 1872	UCR_ENT 00032069	Reduviidae	Zelus	cervicalis	USA	Mississippi	Jones	Laurel	31.6939	-89.1306	1934-08-27	H. M. Harris	Adult Female	TAMU	G. Zhang	2012			GeoLocate Software
Other material	Zelus cervicalis	Stål, 1872	UCR_ENT 00032070	Reduviidae	Zelus	cervicalis	USA	Mississippi	Harrison	Handsboro	30.3985	-89.027	1944-09-12	P. Brodkorb	Adult Female	TAMU	G. Zhang	2012			Gazetteer
Other material	Zelus cervicalis	Stål, 1872	UCR_ENT 00032071	Reduviidae	Zelus	cervicalis	HONDURAS	Francisco Morazan	None	5 mi NE Escuela Agricola Panamericano El Zamorano	14.01	-86.96	1948-07-26	T. H. Hubbell	Adult Male	TAMU	G. Zhang	2012			Google Earth	853 m
Other material	Zelus cervicalis	Stål, 1872	UCR_ENT 00032072	Reduviidae	Zelus	cervicalis	HONDURAS	Francisco Morazan	None	Escuela Agricola Panamericano El Zamorano, Cerro Cacalotepe	14.8181	-87.3281	1948-08-06	T. H. Hubbell	Adult sex unknown	TAMU	G. Zhang	2012			Google Earth	1280 m
Other material	Zelus cervicalis	Stål, 1872	UCR_ENT 00032073	Reduviidae	Zelus	cervicalis	HONDURAS	unknown	none	Rio Sico	15.9667	-84.9667	1923-04-14	T. H. Hubbell	Adult sex unknown	TAMU	G. Zhang	2012			Gazetteer
Other material	Zelus cervicalis	Stål, 1872	UCR_ENT 00032074	Reduviidae	Zelus	cervicalis	HONDURAS	Francisco Morazan	None	Escuela Agricola Panamericano El Zamorano	14.008	-87.009	1948-07-09	T. H. Hubbell	Adult Female	TAMU	G. Zhang	2012			Google Earth	792 m
Other material	Zelus cervicalis	Stål, 1872	UCR_ENT 00032075	Reduviidae	Zelus	cervicalis	MEXICO	Puebla	None or Unknown	Acatlan	18.9833	-97.9167	1948-09-11	H. O. Wagner	Adult Male	TAMU	G. Zhang	2012			Gazetteer	1463 m
Other material	Zelus cervicalis	Stål, 1872	UCR_ENT 00032076	Reduviidae	Zelus	cervicalis	MEXICO	Oaxaca	None or Unknown	Tehuantepec	16.3244	-95.26	1948-11-08	H. O. Wagner	Adult Male	TAMU	G. Zhang	2012			Google Earth	65 m
Other material	Zelus cervicalis	Stål, 1872	UCR_ENT 00032077	Reduviidae	Zelus	cervicalis	MEXICO	Oaxaca	None or Unknown	Tehuantepec	16.3333	-95.2333	1927-08-26 to 1927-08-27	H. O. Wagner	Adult Male	TAMU	G. Zhang	2012
Other material	Zelus cervicalis	Stål, 1872	UCR_ENT 00032078	Reduviidae	Zelus	cervicalis	MEXICO	Guerrero	None or Unknown	Arcelia	18.2833	-100.267	1947-10-31 to 1947-11-02	H. O. Wagner	Adult Male	TAMU	G. Zhang	2012			Gazetteer
Other material	Zelus cervicalis	Stål, 1872	UCR_ENT 00032079	Reduviidae	Zelus	cervicalis	MEXICO	Chiapas	None or Unknown	Cintalapa	16.6914	-93.7241	1948-11-14	H. O. Wagner	Adult Male	TAMU	G. Zhang	2012			Google Earth	555 m
Other material	Zelus cervicalis	Stål, 1872	UCR_ENT 00032080	Reduviidae	Zelus	cervicalis	MEXICO	Chiapas	None or Unknown	Cintalapa	16.6914	-93.7241	1948-11-14	H. O. Wagner	Adult Male	TAMU	G. Zhang	2012			Google Earth	555 m
Other material	Zelus cervicalis	Stål, 1872	UCR_ENT 00032081	Reduviidae	Zelus	cervicalis	MEXICO	Chiapas	None or Unknown	Cintalapa	16.6914	-93.7241	1948-11-14	H. O. Wagner	Adult Female	TAMU	G. Zhang	2012			Google Earth	555 m
Other material	Zelus cervicalis	Stål, 1872	UCR_ENT 00032082	Reduviidae	Zelus	cervicalis	MEXICO	Guerrero	None or Unknown	Teloloapan	18.35	-99.85	1947-11-03 to 1947-11-06	H. O. Wagner	Adult Female	TAMU	G. Zhang	2012			Gazetteer
Other material	Zelus cervicalis	Stål, 1872	UCR_ENT 00032083	Reduviidae	Zelus	cervicalis	MEXICO	Oaxaca	None or Unknown	Tehuantepec	16.3333	-95.2333	1927-08-26 to 1927-08-27	H. O. Wagner	Adult Female	TAMU	G. Zhang	2012
Other material	Zelus cervicalis	Stål, 1872	UCR_ENT 00032084	Reduviidae	Zelus	cervicalis	MEXICO	Guerrero	None or Unknown	Iguala	18.3653	-99.5509	1947-10-27 to 1947-10-29	H. O. Wagner	Adult Female	TAMU	G. Zhang	2012			Google Earth
Other material	Zelus cervicalis	Stål, 1872	UCR_ENT 00032085	Reduviidae	Zelus	cervicalis	MEXICO	Chiapas	None or Unknown	Las Margaritas, 25 km W Comitan	16.2434	-92.357	1948-12-07	H. O. Wagner	Adult Female	TAMU	G. Zhang	2012			Google Earth	1100 m
Other material	Zelus cervicalis	Stål, 1872	UCR_ENT 00032086	Reduviidae	Zelus	cervicalis	MEXICO	Puebla	None or Unknown	Acatlan	18.9833	-97.9167	1948-09-11	H. O. Wagner	Adult Female	TAMU	G. Zhang	2012			Gazetteer	1463 m
Other material	Zelus cervicalis	Stål, 1872	UCR_ENT 00032087	Reduviidae	Zelus	cervicalis	MEXICO	Jalisco	None or Unknown	Vulkan Colima	19.5167	-103.633	1905-04-01	John Laue	Adult Female	TAMU	G. Zhang	2012
Other material	Zelus cervicalis	Stål, 1872	UCR_ENT 00032088	Reduviidae	Zelus	cervicalis	MEXICO	Tamaulipas	None or Unknown	Matamoros	25.8551	-97.4967	1948-09-10	H. O. Wagner	Adult Female	TAMU	G. Zhang	2012			Google Earth	6 m
Other material	Zelus cervicalis	Stål, 1872	UCR_ENT 00036612	Reduviidae	Zelus	cervicalis	MEXICO	Oaxaca	None or Unknown	16.1 mi. nw. Totolapan	17.2477	-96.8522	1974-01-21	Clark, Murray,Ashe,Schaffner	Adult Female	TAMU	G. Zhang	2012			Google Earth
Other material	Zelus cervicalis	Stål, 1872	UCR_ENT 00039347	Reduviidae	Zelus	cervicalis	USA	Florida	Marion	Ocala Nat'l Forest, T. 17 S., R. 26 E., Sec 16	29.1667	-81.7917	1938-07-24	Hubbel- Friauf	Adult Male	TAMU	G. Zhang	2012			GeoLocate Software
Other material	Zelus cervicalis	Stål, 1872	UCR_ENT 00039348	Reduviidae	Zelus	cervicalis	USA	Florida	Jefferson	Lake Miccosukee	30.5291	-83.9782	1922-06-15	J. S. Alexander	Adult Male	TAMU	G. Zhang	2012			Gazetteer
Other material	Zelus cervicalis	Stål, 1872	UCR_ENT 00039349	Reduviidae	Zelus	cervicalis	USA	Florida	Alachua	Gainesville	29.6516	-82.3248	1923-05-12	A. Walker	Adult Male	TAMU	G. Zhang	2012			Google Earth
Other material	Zelus cervicalis	Stål, 1872	UCR_ENT 00039350	Reduviidae	Zelus	cervicalis	USA	Florida	Jackson	Unknown			1955-08-07	J. C. Elkins	Adult Male	TAMU	G. Zhang	2012
Other material	Zelus cervicalis	Stål, 1872	UCR_ENT 00039351	Reduviidae	Zelus	cervicalis	USA	Florida	Jackson	Unknown			1955-08-03	J. C. Elkins	Adult Male	TAMU	G. Zhang	2012
Other material	Zelus cervicalis	Stål, 1872	UCR_ENT 00039352	Reduviidae	Zelus	cervicalis	USA	Florida	Levy	Waccasassa River, T12S R16E	29.3543	-82.7351	1923-09-30	T. H. Hubbell	Adult Male	TAMU	G. Zhang	2012			GeoLocate Software
Other material	Zelus cervicalis	Stål, 1872	UCR_ENT 00039353	Reduviidae	Zelus	cervicalis	USA	Florida	Levy	Camp Toerreya (Twp. 2 N., R. 7 W.)			1925-10-16	T. H. Hubbell	Adult Male	TAMU	G. Zhang	2012
Other material	Zelus cervicalis	Stål, 1872	UCR_ENT 00039354	Reduviidae	Zelus	cervicalis	USA	Florida	Levy	Cedar Key	29.1383	-83.0353	1923-09-29	Unknown	Adult Male	TAMU	G. Zhang	2012
Other material	Zelus cervicalis	Stål, 1872	UCR_ENT 00039355	Reduviidae	Zelus	cervicalis	USA	Florida	Putnam	Welaka	29.4791	-81.6715	1940-03-18	J. J. Friauf	Adult Male	TAMU	G. Zhang	2012			Gazetteer
Other material	Zelus cervicalis	Stål, 1872	UCR_ENT 00039356	Reduviidae	Zelus	cervicalis	USA	Florida	Lake	7 mi N Pittman	29.1018	-81.6416	1938-07-27	Hubbel- Friauf	Adult Male	TAMU	G. Zhang	2012			Google Earth
Other material	Zelus cervicalis	Stål, 1872	UCR_ENT 00039357	Reduviidae	Zelus	cervicalis	USA	Florida	Leon	Tallahassee	30.4383	-84.2807	1924-04-24	T. H. Hubbell	Adult Male	TAMU	G. Zhang	2012			Gazetteer
Other material	Zelus cervicalis	Stål, 1872	UCR_ENT 00039358	Reduviidae	Zelus	cervicalis	USA	Louisiana	St. Charles	St. Rose	29.9469	-90.3231	1935-07-18	I. J. Cantrall	Adult Male	TAMU	G. Zhang	2012			Gazetteer
Other material	Zelus cervicalis	Stål, 1872	UCR_ENT 00039359	Reduviidae	Zelus	cervicalis	USA	Florida	Hillsborough	Tampa	27.9472	-82.4586	1924-02-23	T. H. Hubbell	Adult Male	TAMU	G. Zhang	2012
Other material	Zelus cervicalis	Stål, 1872	UCR_ENT 00039360	Reduviidae	Zelus	cervicalis	USA	Florida	Hillsborough	4 mi NE Thonotosassa	28.1023	-82.2558	1938-08-18	Hubbel- Friauf	Adult Male	TAMU	G. Zhang	2012			Google Earth
Other material	Zelus cervicalis	Stål, 1872	UCR_ENT 00039361	Reduviidae	Zelus	cervicalis	USA	Florida	Polk	Lake Streaty, T. 32, S. 27 E, Sec. 25			1938-08-10	Hubbel- Friauf	Adult Male	TAMU	G. Zhang	2012
Other material	Zelus cervicalis	Stål, 1872	UCR_ENT 00039362	Reduviidae	Zelus	cervicalis	USA	Florida	Broward	Fort Lauderdale	26.1417	-80.1306	1925-09-02	T. H. Hubbell	Adult Male	TAMU	G. Zhang	2012			GeoLocate Software	2 m
Other material	Zelus cervicalis	Stål, 1872	UCR_ENT 00039363	Reduviidae	Zelus	cervicalis	USA	Florida	DeSoto	Arcadia	27.2156	-81.8586	1935-06-29	I. J. Cantrall	Adult Male	TAMU	G. Zhang	2012			Gazetteer
Other material	Zelus cervicalis	Stål, 1872	UCR_ENT 00039364	Reduviidae	Zelus	cervicalis	USA	Florida	Miami-Dade	Miami	25.7739	-80.1939	1933-08-03	F. N. Young	Adult Male	TAMU	G. Zhang	2012			Gazetteer	1 m
Other material	Zelus cervicalis	Stål, 1872	UCR_ENT 00039365	Reduviidae	Zelus	cervicalis	USA	Florida	Alachua	Newnan's Lake	29.6433	-82.2193	1923-11-03	T. H. Hubbell	Adult Male	TAMU	G. Zhang	2012			Gazetteer
Other material	Zelus cervicalis	Stål, 1872	UCR_ENT 00039366	Reduviidae	Zelus	cervicalis	USA	Florida	Jackson	marianna	30.7667	-85.2167	1925-08-02	T. H. Hubbell	Adult Male	TAMU	G. Zhang	2012			Google Earth
Other material	Zelus cervicalis	Stål, 1872	UCR_ENT 00039367	Reduviidae	Zelus	cervicalis	USA	Florida	Madison	Greenville	30.4694	-83.6302	1924-04-23	T. H. Hubbell	Adult Male	TAMU	G. Zhang	2012			Gazetteer
Other material	Zelus cervicalis	Stål, 1872	UCR_ENT 00039368	Reduviidae	Zelus	cervicalis	USA	Florida	Clay	Kingsley Lake	29.9647	-81.9982	1936-05-21	T. H. Hubbell	Adult Male	TAMU	G. Zhang	2012			Gazetteer
Other material	Zelus cervicalis	Stål, 1872	UCR_ENT 00039369	Reduviidae	Zelus	cervicalis	USA	Florida	Manatee	Manatee	27.4802	-82.3453	1925-08-19	T. H. Hubbell	Adult Male	TAMU	G. Zhang	2012			Google Earth
Other material	Zelus cervicalis	Stål, 1872	UCR_ENT 00039370	Reduviidae	Zelus	cervicalis	USA	Florida	Hernando	3.1 mi E Bayport	28.5483	-82.594	1946-11-09	T. H. Hubbell	Adult Male	TAMU	G. Zhang	2012			Google Earth
Other material	Zelus cervicalis	Stål, 1872	UCR_ENT 00039371	Reduviidae	Zelus	cervicalis	USA	Florida	Santa Rosa	Santa Rosa Island	30.3458	-87.0677	1938-11-05 to 1938-11-06	T. H. Hubbell	Adult Male	TAMU	G. Zhang	2012			Gazetteer
Other material	Zelus cervicalis	Stål, 1872	UCR_ENT 00039373	Reduviidae	Zelus	cervicalis	USA	Florida	Bradford	Unknown			1928-10-26	C. F. Byers	Adult Male	TAMU	G. Zhang	2012
Other material	Zelus cervicalis	Stål, 1872	UCR_ENT 00039500	Reduviidae	Zelus	cervicalis	USA	Florida	Escambia	Fort Barrancas	30.3478	-87.2976	1924-06-06	T. H. Hubbell	Adult sex unknown	TAMU	G. Zhang	2012			Gazetteer
Other material	Zelus cervicalis	Stål, 1872	UCR_ENT 00039503	Reduviidae	Zelus	cervicalis	MEXICO	Tamaulipas	None or Unknown	2 mi SE of Gomez Farias	23.0294	-99.1277	1970-07-20	Murray, Phelps, Hart, Schaffner	Adult Male	TAMU	G. Zhang	2012
Other material	Zelus cervicalis	Stål, 1872	UCR_ENT 00039504	Reduviidae	Zelus	cervicalis	MEXICO	Tamaulipas	None or Unknown	2 mi SE of Gomez Farias	23.0294	-99.1277	1970-07-20	Murray, Phelps, Hart, Schaffner	Adult Male	TAMU	G. Zhang	2012
Other material	Zelus cervicalis	Stål, 1872	UCR_ENT 00039505	Reduviidae	Zelus	cervicalis	MEXICO	Tamaulipas	None or Unknown	2 mi SE of Gomez Farias	23.0294	-99.1277	1970-07-20	Murray, Phelps, Hart, Schaffner	Adult Male	TAMU	G. Zhang	2012
Other material	Zelus cervicalis	Stål, 1872	UCR_ENT 00039506	Reduviidae	Zelus	cervicalis	USA	Mississippi	George	Lucedale	30.925	-88.59	1931-04-24	H. G. Johnston	Adult Male	TAMU	G. Zhang	2012
Other material	Zelus cervicalis	Stål, 1872	UCR_ENT 00039507	Reduviidae	Zelus	cervicalis	USA	Mississippi	Jones	Laurel	31.6939	-89.1306	1929-08-14	H. G. Johnston	Adult Male	TAMU	G. Zhang	2012			GeoLocate Software
Other material	Zelus cervicalis	Stål, 1872	UCR_ENT 00039508	Reduviidae	Zelus	cervicalis	USA	Mississippi	Harrison	Gulfport	30.37	-89.09	1929-08-09	H. G. Johnston	Adult Male	TAMU	G. Zhang	2012			Gazetteer
Other material	Zelus cervicalis	Stål, 1872	UCR_ENT 00039509	Reduviidae	Zelus	cervicalis	USA	Florida	Miami-Dade	Miami	25.7739	-80.1939	1909-11-21	F. Hassut	Adult Male	TAMU	G. Zhang	2012			Gazetteer	1 m
Other material	Zelus cervicalis	Stål, 1872	UCR_ENT 00039510	Reduviidae	Zelus	cervicalis	USA	Mississippi	Oktibbeha	Oktoc	33.3323	-88.7578	1971-10-28	Burke and Gaumer	Adult Male	TAMU	G. Zhang	2012			Gazetteer
Other material	Zelus cervicalis	Stål, 1872	UCR_ENT 00039511	Reduviidae	Zelus	cervicalis	USA	Mississippi	Harrison	Landon	30.4378	-89.1028	1931-04-15	H. G. Johnston	Adult Male	TAMU	G. Zhang	2012
Other material	Zelus cervicalis	Stål, 1872	UCR_ENT 00039512	Reduviidae	Zelus	cervicalis	USA	South Carolina	Pickens	Calhoun	34.6925	-82.8317	1949-08-25	W. F. Chamberlain	Adult Male	TAMU	G. Zhang	2012
Other material	Zelus cervicalis	Stål, 1872	UCR_ENT 00039513	Reduviidae	Zelus	cervicalis	USA	South Carolina	Lexington	Pelion	33.7632	-81.2448	1949-08-07	G. M. Chamberlain	Adult Male	TAMU	G. Zhang	2012			Gazetteer
Other material	Zelus cervicalis	Stål, 1872	UCR_ENT 00039514	Reduviidae	Zelus	cervicalis	USA	Oklahoma	Kingfisher	8 mi W Hennessey	36.116	-98.0428	1970-08-08 to 1970-08-09	V.V. Board	Adult Male	TAMU	G. Zhang	2012			Google Earth
Other material	Zelus cervicalis	Stål, 1872	UCR_ENT 00039515	Reduviidae	Zelus	cervicalis	USA	Florida	Gadsden	Quincy	30.5871	-84.5833	1950-08-26	G. M. Chamberlain	Adult Male	TAMU	G. Zhang	2012			Gazetteer	63 m
Other material	Zelus cervicalis	Stål, 1872	UCR_ENT 00039516	Reduviidae	Zelus	cervicalis	USA	South Carolina	Aiken	Eureka	33.694	-81.7671	1949-09-04	W.F. Chamberlain	Adult Male	TAMU	G. Zhang	2012			Gazetteer
Other material	Zelus cervicalis	Stål, 1872	UCR_ENT 00039517	Reduviidae	Zelus	cervicalis	USA	South Carolina	Charleston	Sullivan's Island	32.7632	-79.8368	1950-10-03	W.F. Chamberlain	Adult Male	TAMU	G. Zhang	2012			Gazetteer
Other material	Zelus cervicalis	Stål, 1872	UCR_ENT 00039518	Reduviidae	Zelus	cervicalis	USA	Louisiana	West Feliciana	St. Francisville	30.7799	-91.3765	1935-07-21	T. McGregor	Adult Male	TAMU	G. Zhang	2012			Gazetteer
Other material	Zelus cervicalis	Stål, 1872	UCR_ENT 00039519	Reduviidae	Zelus	cervicalis	USA	Louisiana	East Baton Rouge	Baton Rouge	30.4506	-91.1544	1935-06-30	T. McGregor	Adult Female	TAMU	G. Zhang	2012
Other material	Zelus cervicalis	Stål, 1872	UCR_ENT 00039520	Reduviidae	Zelus	cervicalis	USA	Florida	Pinellas	Tarpon Springs	28.1461	-82.7568	1956-07-25	W.F. Chamberlain	Adult Female	TAMU	G. Zhang	2012			Gazetteer
Other material	Zelus cervicalis	Stål, 1872	UCR_ENT 00039521	Reduviidae	Zelus	cervicalis	USA	South Carolina	Lexington	Pelion	33.7632	-81.2448	1950-09-16	W.F. Chamberlain	Adult Female	TAMU	G. Zhang	2012			Gazetteer
Other material	Zelus cervicalis	Stål, 1872	UCR_ENT 00039522	Reduviidae	Zelus	cervicalis	USA	South Carolina	Lexington	Pelion	33.7632	-81.2448	1950-09-16	W.F. Chamberlain	Adult Female	TAMU	G. Zhang	2012			Gazetteer
Other material	Zelus cervicalis	Stål, 1872	UCR_ENT 00039523	Reduviidae	Zelus	cervicalis	USA	South Carolina	Pickens	Clemson	34.6834	-82.8374	1950-09-03	W.F. Chamberlain	Adult Female	TAMU	G. Zhang	2012			Gazetteer
Other material	Zelus cervicalis	Stål, 1872	UCR_ENT 00039524	Reduviidae	Zelus	cervicalis	USA	Florida	Gadsden	Quincy	30.5871	-84.5833	1950-08-26	G. M. Chamberlain	Adult Female	TAMU	G. Zhang	2012			Gazetteer	63 m
Other material	Zelus cervicalis	Stål, 1872	UCR_ENT 00039525	Reduviidae	Zelus	cervicalis	USA	Florida	Gadsden	Quincy	30.5871	-84.5833	1950-08-26	G. M. Chamberlain	Adult Female	TAMU	G. Zhang	2012			Gazetteer	63 m
Other material	Zelus cervicalis	Stål, 1872	UCR_ENT 00039526	Reduviidae	Zelus	cervicalis	USA	Florida	Miami-Dade	Homestead	25.4683	-80.4778	1982-03-23	J. E. Eger	Adult Female	TAMU	G. Zhang	2012			GeoLocate Software
Other material	Zelus cervicalis	Stål, 1872	UCR_ENT 00039527	Reduviidae	Zelus	cervicalis	USA	Florida	Hillsborough	Tampa	27.9472	-82.4586	1982-02-20	J. E. Eger	Adult Female	TAMU	G. Zhang	2012
Other material	Zelus cervicalis	Stål, 1872	UCR_ENT 00039528	Reduviidae	Zelus	cervicalis	USA	Mississippi	Yazoo	Yazoo City	32.855	-90.4056	1929-07-27	H. G. Johnston	Adult Female	TAMU	G. Zhang	2012			GeoLocate Software
Other material	Zelus cervicalis	Stål, 1872	UCR_ENT 00039529	Reduviidae	Zelus	cervicalis	USA	Mississippi	Adams	Natchez	31.5617	-91.4075	1929-07-31	H. G. Johnston	Adult Female	TAMU	G. Zhang	2012			Google Earth	43 m
Other material	Zelus cervicalis	Stål, 1872	UCR_ENT 00039530	Reduviidae	Zelus	cervicalis	USA	Mississippi	Yazoo	Yazoo City	32.855	-90.4056	1929-07-27	H. G. Johnston	Adult Female	TAMU	G. Zhang	2012			GeoLocate Software
Other material	Zelus cervicalis	Stål, 1872	UCR_ENT 00039531	Reduviidae	Zelus	cervicalis	USA	Mississippi	Leake	Carthage	32.7325	-89.5361	1936-05-30	H. G. Johnston	Adult Female	TAMU	G. Zhang	2012
Other material	Zelus cervicalis	Stål, 1872	UCR_ENT 00039532	Reduviidae	Zelus	cervicalis	USA	Texas	Aransas	Goose Island State Park	28.1353	-96.9872	1969-06-26	Board and Hafernik	Adult Male	TAMU	G. Zhang	2012
Other material	Zelus cervicalis	Stål, 1872	UCR_ENT 00039533	Reduviidae	Zelus	cervicalis	USA	Texas	San Patricio	Welder Wildlife Foundation Park	28.1081	-97.3778	1969-06-28	Board and Hafernik	Adult Male	TAMU	G. Zhang	2012
Other material	Zelus cervicalis	Stål, 1872	UCR_ENT 00039534	Reduviidae	Zelus	cervicalis	USA	Texas	Aransas	Aransas National Wildlife Refuge	28.3077	-96.8045	1977-10-22	R. S. Peigler	Adult Male	TAMU	G. Zhang	2012			Google Earth
Other material	Zelus cervicalis	Stål, 1872	UCR_ENT 00039535	Reduviidae	Zelus	cervicalis	USA	Texas	San Patricio	Welder Wildlife Foundation Park	28.1081	-97.3778	1969-06-28	Board and Hafernik	Adult Male	TAMU	G. Zhang	2012
Other material	Zelus cervicalis	Stål, 1872	UCR_ENT 00039536	Reduviidae	Zelus	cervicalis	USA	Texas	San Patricio	Welder Wildlife Foundation Park	28.1081	-97.3778	1969-06-28	Board and Hafernik	Adult Male	TAMU	G. Zhang	2012
Other material	Zelus cervicalis	Stål, 1872	UCR_ENT 00039537	Reduviidae	Zelus	cervicalis	USA	Texas	San Patricio	Welder Wildlife Foundation Park	28.1081	-97.3778	1969-06-27	Board and Hafernik	Adult Male	TAMU	G. Zhang	2012
Other material	Zelus cervicalis	Stål, 1872	UCR_ENT 00039538	Reduviidae	Zelus	cervicalis	USA	Texas	Galveston	Dickinson	29.4608	-95.0513	1950-06-16	J.A. Honey	Adult Male	TAMU	G. Zhang	2012			Gazetteer
Other material	Zelus cervicalis	Stål, 1872	UCR_ENT 00039539	Reduviidae	Zelus	cervicalis	USA	Texas	Williamson	Taylor	30.5706	-97.4092	1961-08-16	J. E. Hafernik	Adult Male	TAMU	G. Zhang	2012
Other material	Zelus cervicalis	Stål, 1872	UCR_ENT 00039540	Reduviidae	Zelus	cervicalis	USA	Texas	Williamson	Taylor	30.5706	-97.4092	1969-03-18	J. E. Hafernik	Adult Male	TAMU	G. Zhang	2012
Other material	Zelus cervicalis	Stål, 1872	UCR_ENT 00039541	Reduviidae	Zelus	cervicalis	USA	Texas	Cameron	5 mi W Brownsville	25.9723	-97.5135	1969-06-22	Board and Hafernik	Adult Male	TAMU	G. Zhang	2012			Google Earth
Other material	Zelus cervicalis	Stål, 1872	UCR_ENT 00039542	Reduviidae	Zelus	cervicalis	USA	Texas	Blanco	Round Mountain	30.431	-98.3441	1971-04-28	V.V. Board	Adult Male	TAMU	G. Zhang	2012			Google Earth
Other material	Zelus cervicalis	Stål, 1872	UCR_ENT 00039543	Reduviidae	Zelus	cervicalis	USA	Texas	Walker	8 mi W New Waverly	30.5254	-95.6238	1976-05-03	V.V. Board	Adult Male	TAMU	G. Zhang	2012			Google Earth
Other material	Zelus cervicalis	Stål, 1872	UCR_ENT 00039544	Reduviidae	Zelus	cervicalis	USA	Texas	Gonzales	Palmetto State Park	29.5869	-97.5819	1969-06-07	Board and Hafernik	Adult Male	TAMU	G. Zhang	2012
Other material	Zelus cervicalis	Stål, 1872	UCR_ENT 00039545	Reduviidae	Zelus	cervicalis	USA	Texas	Sabine	Sabine Natl. Forest, 2.9 mi S Yellowpine			1975-07-29	J. S. Ashe	Adult Male	TAMU	G. Zhang	2012
Other material	Zelus cervicalis	Stål, 1872	UCR_ENT 00039546	Reduviidae	Zelus	cervicalis	USA	Texas	Jackson	Lolita	28.8394	-96.5425	1968-10-19	Hafernick	Adult Male	TAMU	G. Zhang	2012			Gazetteer
Other material	Zelus cervicalis	Stål, 1872	UCR_ENT 00039547	Reduviidae	Zelus	cervicalis	USA	Texas	Burnet	Inks [Lake] State Park	30.7384	-98.365	1975-06-12	J. S. Ashe	Adult Male	TAMU	G. Zhang	2012			Google Earth	285 m
Other material	Zelus cervicalis	Stål, 1872	UCR_ENT 00039548	Reduviidae	Zelus	cervicalis	USA	Texas	McLennan	3 mi W of West	31.8041	-97.1446	1971-05-03	J. C. Schaffner	Adult Male	TAMU	G. Zhang	2012			Google Earth	170 m
Other material	Zelus cervicalis	Stål, 1872	UCR_ENT 00039549	Reduviidae	Zelus	cervicalis	USA	Texas	Anderson	Salmon	31.5728	-95.4981	1974-04-12 to 1974-04-13	H. R. Burke	Adult Male	TAMU	G. Zhang	2012
Other material	Zelus cervicalis	Stål, 1872	UCR_ENT 00039550	Reduviidae	Zelus	cervicalis	USA	Texas	Houston	Austonio	31.19	-95.64	1985-08-26	D. A. Dean	Adult Male	TAMU	G. Zhang	2012			Gazetteer
Other material	Zelus cervicalis	Stål, 1872	UCR_ENT 00039551	Reduviidae	Zelus	cervicalis	USA	Texas	Hidalgo	Delta Lake County Park	26.4123	-97.9603	1991-11-01	Carlow and Riley	Adult Male	TAMU	G. Zhang	2012			Google Earth
Other material	Zelus cervicalis	Stål, 1872	UCR_ENT 00039552	Reduviidae	Zelus	cervicalis	MEXICO	Guerrero	None or Unknown	Acapulco	16.8569	-99.9015	1975-06-13 to 1975-06-21	Joe Eger	Adult Male	TAMU	G. Zhang	2012			Gazetteer
Other material	Zelus cervicalis	Stål, 1872	UCR_ENT 00039553	Reduviidae	Zelus	cervicalis	USA	Texas	Travis	Pace Bend Park	30.4566	-98.0209	1980-05-15	C. W. Agnew	Adult Male	TAMU	G. Zhang	2012			Google Earth
Other material	Zelus cervicalis	Stål, 1872	UCR_ENT 00039554	Reduviidae	Zelus	cervicalis	USA	Texas	Brazos	College Station	30.6278	-96.3342	1917-03-30	Unknown	Adult Male	TAMU	G. Zhang	2012
Other material	Zelus cervicalis	Stål, 1872	UCR_ENT 00039555	Reduviidae	Zelus	cervicalis	USA	Texas	Kendall	Boerne	29.7944	-98.7317	1982-04-25	W. F. Chamberlain	Adult Female	TAMU	G. Zhang	2012
Other material	Zelus cervicalis	Stål, 1872	UCR_ENT 00039556	Reduviidae	Zelus	cervicalis	USA	Texas	Cameron	Brownsville	25.9014	-97.4972	1979-03-10 to 1979-03-13	F. L. Mitchell	Adult Female	TAMU	G. Zhang	2012			GeoLocate Software
Other material	Zelus cervicalis	Stål, 1872	UCR_ENT 00039557	Reduviidae	Zelus	cervicalis	USA	Texas	Blanco	Round Mountain	30.431	-98.3441	1971-04-28	V.V. Board	Adult Female	TAMU	G. Zhang	2012			Google Earth
Other material	Zelus cervicalis	Stål, 1872	UCR_ENT 00039558	Reduviidae	Zelus	cervicalis	USA	Texas	Burleson	Somerville Lake	30.3458	-96.5281	1980-06-14	G. W. Brooks	Adult Female	TAMU	G. Zhang	2012
Other material	Zelus cervicalis	Stål, 1872	UCR_ENT 00039559	Reduviidae	Zelus	cervicalis	USA	Texas	Angelina	Pollok	31.4466	-94.8722	1976-04-12	W.F. Chamberlain	Adult Female	TAMU	G. Zhang	2012			Gazetteer
Other material	Zelus cervicalis	Stål, 1872	UCR_ENT 00039561	Reduviidae	Zelus	cervicalis	USA	Texas	Nacogdoches	Nacogdoches (Town of)	31.6033	-94.6553	1976-04-12	W.F. Chamberlain	Adult Female	TAMU	G. Zhang	2012			GeoLocate Software
Other material	Zelus cervicalis	Stål, 1872	UCR_ENT 00039562	Reduviidae	Zelus	cervicalis	USA	Texas	Willacy	Raymondville, 6 mi N	26.4811	-97.7828	1969-06-11	Board and Hafernik	Adult Female	TAMU	G. Zhang	2012
Other material	Zelus cervicalis	Stål, 1872	UCR_ENT 00039563	Reduviidae	Zelus	cervicalis	USA	Texas	Comanche	Desdemona	32.2704	-98.5503	1982-08-11	C. W. Agnew	Adult Female	TAMU	G. Zhang	2012			Gazetteer
Other material	Zelus cervicalis	Stål, 1872	UCR_ENT 00039564	Reduviidae	Zelus	cervicalis	USA	Texas	Walker	Walker Co.	30.7335	-95.5669	1978-09-25	C. W. Agnew	Adult Female	TAMU	G. Zhang	2012	Additional label reads: Collected on Cotton.		Gazetteer
Other material	Zelus cervicalis	Stål, 1872	UCR_ENT 00039565	Reduviidae	Zelus	cervicalis	USA	Texas	Walker	8 mi W New Waverly	30.5254	-95.6238	1970-05-03	V.V. Board	Adult Female	TAMU	G. Zhang	2012			Google Earth
Other material	Zelus cervicalis	Stål, 1872	UCR_ENT 00039566	Reduviidae	Zelus	cervicalis	USA	Texas	Travis	Austin	30.2669	-97.7428	1968-09-28	Hugh Smith	Adult Female	TAMU	G. Zhang	2012
Other material	Zelus cervicalis	Stål, 1872	UCR_ENT 00039567	Reduviidae	Zelus	cervicalis	USA	Texas	San Patricio	Welder Wildlife Foundation Park	28.1081	-97.3778	1969-06-28	Board and Hafernik	Adult Female	TAMU	G. Zhang	2012
Other material	Zelus cervicalis	Stål, 1872	UCR_ENT 00039568	Reduviidae	Zelus	cervicalis	USA	Texas	San Patricio	Welder Wildlife Foundation Park	28.1081	-97.3778	1969-06-28	Board and Hafernik	Adult Female	TAMU	G. Zhang	2012
Other material	Zelus cervicalis	Stål, 1872	UCR_ENT 00039569	Reduviidae	Zelus	cervicalis	USA	Texas	Cameron	White Wing Reserve, Brownsville	25.9017	-97.4975	1970-06-09	V. V. Board	Adult Female	TAMU	G. Zhang	2012			Gazetteer
Other material	Zelus cervicalis	Stål, 1872	UCR_ENT 00039570	Reduviidae	Zelus	cervicalis	USA	Texas	Sabine	3 mi W Milam	31.4416	-93.8936	1990-04-09	W. F. Chamberlain	Adult Female	TAMU	G. Zhang	2012			Google Earth
Other material	Zelus cervicalis	Stål, 1872	UCR_ENT 00039571	Reduviidae	Zelus	cervicalis	USA	Texas	Grayson	Juniper Point, 5 mi NE Gordonville	33.8366	-96.8256	1972-07-22	E. E. Grissell	Adult Female	TAMU	G. Zhang	2012			Google Earth
Other material	Zelus cervicalis	Stål, 1872	UCR_ENT 00039572	Reduviidae	Zelus	cervicalis	USA	Texas	San Patricio	Welder Wildlife Foundation Park	28.1081	-97.3778	1969-06-28	Board and Hafernik	Adult Female	TAMU	G. Zhang	2012
Other material	Zelus cervicalis	Stål, 1872	UCR_ENT 00039581	Reduviidae	Zelus	cervicalis	USA	Texas	Erath	Stephenville	32.2206	-98.2019	1982-04-04	C. W. Agnew	Adult Female	TAMU	G. Zhang	2012
Other material	Zelus cervicalis	Stål, 1872	UCR_ENT 00039582	Reduviidae	Zelus	cervicalis	USA	Texas	Cameron	Brownsville	25.9014	-97.4972	1982-10-24	C. W. Agnew	Adult Female	TAMU	G. Zhang	2012			GeoLocate Software
Other material	Zelus cervicalis	Stål, 1872	UCR_ENT 00039583	Reduviidae	Zelus	cervicalis	USA	Texas	Cameron	Brownsville	25.9014	-97.4972	1979-03-10	C. W. Agnew	Adult Female	TAMU	G. Zhang	2012			GeoLocate Software
Other material	Zelus cervicalis	Stål, 1872	UCR_ENT 00039584	Reduviidae	Zelus	cervicalis	USA	Texas	Galveston	Dickinson	29.4608	-95.0513	1929-05-01	F. M. Hull	Adult Female	TAMU	G. Zhang	2012			Gazetteer
Other material	Zelus cervicalis	Stål, 1872	UCR_ENT 00039585	Reduviidae	Zelus	cervicalis	USA	Texas	Cameron	8 mi W Brownsville	25.9364	-97.5539	1969-06-11	Board and Hafernik	Adult Female	TAMU	G. Zhang	2012			Google Earth
Other material	Zelus cervicalis	Stål, 1872	UCR_ENT 00039586	Reduviidae	Zelus	cervicalis	USA	Texas	Cameron	Brownsville	25.9014	-97.4972	1969-06-13	Board and Hafernik	Adult Female	TAMU	G. Zhang	2012			GeoLocate Software
Other material	Zelus cervicalis	Stål, 1872	UCR_ENT 00039587	Reduviidae	Zelus	cervicalis	USA	Texas	Brazos	College Station	30.6278	-96.3342	1979-04-28	C. W. Agnew	Adult Female	TAMU	G. Zhang	2012
Other material	Zelus cervicalis	Stål, 1872	UCR_ENT 00039588	Reduviidae	Zelus	cervicalis	USA	Texas	Brazos	Navasota Ridge, Hwy 30	30.4977	-96.1692	1970-03-08	V.V. Board	Adult Female	TAMU	G. Zhang	2012			Google Earth
Other material	Zelus cervicalis	Stål, 1872	UCR_ENT 00039589	Reduviidae	Zelus	cervicalis	USA	Texas	Galveston	Dickinson	29.4608	-95.0513	1951-08-29	H. J. Reinhard	Adult Female	TAMU	G. Zhang	2012			Gazetteer
Other material	Zelus cervicalis	Stål, 1872	UCR_ENT 00039590	Reduviidae	Zelus	cervicalis	MEXICO	Tamaulipas	None or Unknown	2 mi SE of Gomez Farias	23.0294	-99.1277	1970-07-20	Murray, Phelps, Hart, Schaffner	Adult Male	TAMU	G. Zhang	2012
Other material	Zelus cervicalis	Stål, 1872	UCR_ENT 00039591	Reduviidae	Zelus	cervicalis	MEXICO	Chiapas	None or Unknown	13 mi W of Cintalapa	16.6917	-93.9248	1955-12-26	J. C. Schaffner	Adult Male	TAMU	G. Zhang	2012			GeoLocate Software
Other material	Zelus cervicalis	Stål, 1872	UCR_ENT 00039592	Reduviidae	Zelus	cervicalis	MEXICO	Chiapas	None or Unknown	13 mi W of Cintalapa	16.6917	-93.9248	1955-12-26	J. C. Schaffner	Adult Male	TAMU	G. Zhang	2012			GeoLocate Software
Other material	Zelus cervicalis	Stål, 1872	UCR_ENT 00039593	Reduviidae	Zelus	cervicalis	MEXICO	Guerrero	None or Unknown	15 miles NE of Acapulco	16.9935	-99.6987	1956-01-13	J. C. Schaffner	Adult Male	TAMU	G. Zhang	2012			Google Earth
Other material	Zelus cervicalis	Stål, 1872	UCR_ENT 00039594	Reduviidae	Zelus	cervicalis	MEXICO	Veracruz	None or Unknown	Vega de Alatorre	20.0333	-96.6333	1971-06-28	Clark, Murray, Hart, Schaffner	Adult Male	TAMU	G. Zhang	2012			Gazetteer
Other material	Zelus cervicalis	Stål, 1872	UCR_ENT 00039596	Reduviidae	Zelus	cervicalis	MEXICO	Sinaloa	None or Unknown	Rosario	23	-105.867	1979-10-25	W. F. Chamberlain	Adult Male	TAMU	G. Zhang	2012			Gazetteer
Other material	Zelus cervicalis	Stål, 1872	UCR_ENT 00039597	Reduviidae	Zelus	cervicalis	MEXICO	Guerrero	None or Unknown	32 mi SE of Petatlan	17.1873	-100.922	1984-07-14	Carroll, Schaffner, Friedlander	Adult Male	TAMU	G. Zhang	2012
Other material	Zelus cervicalis	Stål, 1872	UCR_ENT 00039598	Reduviidae	Zelus	cervicalis	MEXICO	Guerrero	None or Unknown	10.3 mi S of Iguala	17.7002	-100.367	1981-07-23	Bogar, Schaffner and Friedlander	Adult Male	TAMU	G. Zhang	2012
Other material	Zelus cervicalis	Stål, 1872	UCR_ENT 00039599	Reduviidae	Zelus	cervicalis	MEXICO	Puebla	None or Unknown	13.3 mi NE of Tehuitzingo	18.35	-98.2833	1974-07-13 to 1974-07-14	Clark, Murray, Ashe, Schaffner	Adult Male	TAMU	G. Zhang	2012			Gazetteer	1078 m
Other material	Zelus cervicalis	Stål, 1872	UCR_ENT 00039600	Reduviidae	Zelus	cervicalis	MEXICO	Oaxaca	None or Unknown	16.1 mi NW of Totolapan	16.8321	-96.4728	1974-07-21	Clark, Murray, Ashe, Schaffner	Adult Male	TAMU	G. Zhang	2012
Other material	Zelus cervicalis	Stål, 1872	UCR_ENT 00039601	Reduviidae	Zelus	cervicalis	MEXICO	Durango	None or Unknown	8 mi ENE of Guadalupe Victoria	24.5121	-104.005	1959-07-14	R. B. Selander and J. C. Schaffner	Adult Male	TAMU	G. Zhang	2012			Google Earth	2000 m
Other material	Zelus cervicalis	Stål, 1872	UCR_ENT 00039602	Reduviidae	Zelus	cervicalis	MEXICO	Tamaulipas	None or Unknown	2 mi SE of Gomez Farias	23.0294	-99.1277	1970-07-20	Murray, Phelps, Hart, Schaffner	Adult Female	TAMU	G. Zhang	2012
Other material	Zelus cervicalis	Stål, 1872	UCR_ENT 00039603	Reduviidae	Zelus	cervicalis	MEXICO	Oaxaca	None or Unknown	50 mi. N. of La Ventosa			1955-12-14	J.C. Schaffner	Adult Female	TAMU	G. Zhang	2012
Other material	Zelus cervicalis	Stål, 1872	UCR_ENT 00039604	Reduviidae	Zelus	cervicalis	MEXICO	Chiapas	None or Unknown	13 mi W of Cintalapa	16.6917	-93.9248	1955-12-26	J. C. Schaffner	Adult Female	TAMU	G. Zhang	2012			GeoLocate Software
Other material	Zelus cervicalis	Stål, 1872	UCR_ENT 00039605	Reduviidae	Zelus	cervicalis	MEXICO	Guerrero	None or Unknown	32 mi S of Iguala	17.3847	-100.367	1966-07-12	P.M. and P.K. Wagner	Adult Female	TAMU	G. Zhang	2012
Other material	Zelus cervicalis	Stål, 1872	UCR_ENT 00039606	Reduviidae	Zelus	cervicalis	MEXICO	Veracruz	None or Unknown	1 mi W of Papantla	20.45	-97.3322	1971-06-28	Clark, Murray, Hart, Schaffner	Adult Female	TAMU	G. Zhang	2012
Other material	Zelus cervicalis	Stål, 1872	UCR_ENT 00039607	Reduviidae	Zelus	cervicalis	MEXICO	Jalisco	None or Unknown	Road up east side Vulcan de Colima	19.5755	-103.608	1972-01-06	R.R. & M.E. Murray	Adult Female	TAMU	G. Zhang	2012			Google Earth	2621 m
Other material	Zelus cervicalis	Stål, 1872	UCR_ENT 00039608	Reduviidae	Zelus	cervicalis	MEXICO	Oaxaca	None or Unknown	2.1 mi NW of Totolapan	16.6883	-96.3225	1974-07-21	Clark, Murray, Ashe, Schaffner	Adult Female	TAMU	G. Zhang	2012
Other material	Zelus cervicalis	Stål, 1872	UCR_ENT 00039609	Reduviidae	Zelus	cervicalis	MEXICO	Oaxaca	None or Unknown	2.1 mi NW of Totolapan	16.6883	-96.3225	1974-07-21	Clark, Murray, Ashe, Schaffner	Adult Female	TAMU	G. Zhang	2012
Other material	Zelus cervicalis	Stål, 1872	UCR_ENT 00039610	Reduviidae	Zelus	cervicalis	MEXICO	Oaxaca	None or Unknown	2.1 mi NW of Totolapan	16.6883	-96.3225	1974-07-21	Clark, Murray, Ashe, Schaffner	Adult Female	TAMU	G. Zhang	2012
Other material	Zelus cervicalis	Stål, 1872	UCR_ENT 00039611	Reduviidae	Zelus	cervicalis	MEXICO	Oaxaca	None or Unknown	2.1 mi NW of Totolapan	16.6883	-96.3225	1974-07-21	Clark, Murray, Ashe, Schaffner	Adult Female	TAMU	G. Zhang	2012
Other material	Zelus cervicalis	Stål, 1872	UCR_ENT 00039695	Reduviidae	Zelus	cervicalis	USA	Florida	Miami-Dade	Miami	25.7739	-80.1939	1969-11-27	Unknown	Adult sex unknown	TAMU	G. Zhang	2012			Gazetteer	1 m
Other material	Zelus cervicalis	Stål, 1872	UCR_ENT 00039696	Reduviidae	Zelus	cervicalis	USA	Mississippi	Choctaw	Ackerman	33.3094	-89.1716	1929-08-19	H. G. Johnston	Adult sex unknown	TAMU	G. Zhang	2012			Google Earth
Other material	Zelus cervicalis	Stål, 1872	UCR_ENT 00039729	Reduviidae	Zelus	cervicalis	MEXICO	Guerrero	None or Unknown	6 mi E of Xochipala	17.7936	-99.5426	1985-07-13	Jones, Schaffner	Adult Female	TAMU	G. Zhang	2012			GeoLocate Software	1067 m
Other material	Zelus cervicalis	Stål, 1872	UCR_ENT 00040137	Reduviidae	Zelus	cervicalis	USA	Florida	Hillsborough	Tampa	27.9472	-82.4586	1981-10-18	J. E. Eger	Adult Female	TAMU	G. Zhang	2012
Other material	Zelus cervicalis	Stål, 1872	UCR_ENT 00040138	Reduviidae	Zelus	cervicalis	USA	Missouri	Taney	Forsyth	36.6851	-93.1199	1960-05-23	J. C. Schaffner	Adult Female	TAMU	G. Zhang	2012			Gazetteer
Other material	Zelus cervicalis	Stål, 1872	UCR_ENT 00040216	Reduviidae	Zelus	cervicalis	USA	Texas	Brazos	College Station	30.6278	-96.3342	1967-09-01	E. Hart	Adult Female	TAMU
Other material	Zelus cervicalis	Stål, 1872	UCR_ENT 00040398	Reduviidae	Zelus	cervicalis	USA	Texas	Live Oak	8 mi S George West	28.2105	-98.1055	1975-08-22	D.W. Plitt	Adult Female	TAMU	G. Zhang	2012			Google Earth
Other material	Zelus cervicalis	Stål, 1872	UCR_ENT 00034035	Reduviidae	Zelus	cervicalis	MEXICO	Oaxaca	None or Unknown	20 mi E of El Camaron	16.5459	-95.8053	1956-07-21	D. D. Linsdale	Adult Male	UCB	G. Zhang	2012			Google Earth	1784 m
Other material	Zelus cervicalis	Stål, 1872	UCR_ENT 00034036	Reduviidae	Zelus	cervicalis	MEXICO	Oaxaca	None or Unknown	4 mi E El Camaron	15.8792	-96.9369	1963-10-13	A. E. Michelbacher	Adult Female	UCB	G. Zhang	2012			Google Earth
Other material	Zelus cervicalis	Stål, 1872	UCR_ENT 00034037	Reduviidae	Zelus	cervicalis	MEXICO	Chiapas	None or Unknown	Simojovel	17.1406	-92.711	1958-08-01 to 1958-08-16	J. A. Chemsak	Adult Female	UCB	G. Zhang	2012			Google Earth
Other material	Zelus cervicalis	Stål, 1872	UCR_ENT 00034038	Reduviidae	Zelus	cervicalis	MEXICO	Chiapas	None or Unknown	12 mi NW Altamirano	16.8552	-92.1638	1953-03-08	R. F. Smith	Adult Female	UCB	G. Zhang	2012			Google Earth
Other material	Zelus cervicalis	Stål, 1872	UCR_ENT 00034039	Reduviidae	Zelus	cervicalis	USA	Georgia	Ware	Okefenokee Swamp, Billy's Island	30.8052	-82.3404	1912-06-01	Unknown	Adult Female	UCB	G. Zhang	2012			Gazetteer
Other material	Zelus cervicalis	Stål, 1872	UCR_ENT 00034040	Reduviidae	Zelus	cervicalis	USA	Georgia	Ware	Okefenokee Swamp, Billy's Island	30.8052	-82.3404	1912-06-01	Unknown	Adult Male	UCB	G. Zhang	2012			Gazetteer
Other material	Zelus cervicalis	Stål, 1872	UCR_ENT 00034041	Reduviidae	Zelus	cervicalis	MEXICO	Oaxaca	None or Unknown	3 mi W Mitla	16.9145	-96.3459	1953-04-09	R. C. Bechtel	Adult Male	UCB	G. Zhang	2012			Google Earth
Other material	Zelus cervicalis	Stål, 1872	UCR_ENT 00034042	Reduviidae	Zelus	cervicalis	USA	Texas	Cameron	8 mi NE Los Fresnos	26.153	-97.3852	1959-07-31	R. F. Smith	Adult Male	UCB	G. Zhang	2012			Google Earth
Other material	Zelus cervicalis	Stål, 1872	UCR_ENT 00034043	Reduviidae	Zelus	cervicalis	MEXICO	Chiapas	None or Unknown	Pueblo Nuevo	15.2096	-92.5801	1958-03-20	R. C. Bechtel and E. I. Schlinger	Adult Female	UCB	G. Zhang	2012			Google Earth
Other material	Zelus cervicalis	Stål, 1872	UCR_ENT 00034044	Reduviidae	Zelus	cervicalis	MEXICO	Guerrero	None or Unknown	Mexcala	17.9333	-99.6167	1951-06-29	P. D. Hurd	Adult Female	UCB	G. Zhang	2012			Gazetteer	499 m
Other material	Zelus cervicalis	Stål, 1872	UCR_ENT 00034045	Reduviidae	Zelus	cervicalis	MEXICO	Puebla	None or Unknown	2 mi NW Tehuacan	18.4779	-97.4403	1953-04-25	R. C. Bechtel and E. I. Schlinger	Adult sex unknown	UCB	G. Zhang	2012		Sweep Netting	Google Earth
Other material	Zelus cervicalis	Stål, 1872	UCR_ENT 00034046	Reduviidae	Zelus	cervicalis	MEXICO	Oaxaca	None or Unknown	Mitla	16.9167	-96.4	1953-04-19	R. C. Bechtel	Adult Male	UCB	G. Zhang	2012			Gazetteer	1683 m
Other material	Zelus cervicalis	Stål, 1872	UCR_ENT 00034047	Reduviidae	Zelus	cervicalis	MEXICO	Sonora	None or Unknown	Nogales	31.3333	-110.933	1965-11-11	A. E. Michelbacher	Adult Female	UCB	G. Zhang	2012			Gazetteer	1273 m
Other material	Zelus cervicalis	Stål, 1872	UCR_ENT 00034048	Reduviidae	Zelus	cervicalis	MEXICO	Veracruz	None or Unknown	7 mi SE Catemaco	18.3403	-95.1034	1953-04-21	R. C. Bechtel	Adult Female	UCB	G. Zhang	2012			Google Earth
Other material	Zelus cervicalis	Stål, 1872	UCR_ENT 00034049	Reduviidae	Zelus	cervicalis	MEXICO	Chiapas	None or Unknown	Teopisca	16.5167	-92.4833	1953-03-13	R. C. Bechtel and E. I. Schlinger	Adult Female	UCB	G. Zhang	2012
Other material	Zelus cervicalis	Stål, 1872	UCR_ENT 00034050	Reduviidae	Zelus	cervicalis	MEXICO	Chiapas	None or Unknown	Revolution, 9 mi SE Buena Vista	16.919	-92.0852	1953-03-23	R. C. Bechtel and E. I. Schlinger	Adult Male	UCB	G. Zhang	2012			Google Earth
Other material	Zelus cervicalis	Stål, 1872	UCR_ENT 00034051	Reduviidae	Zelus	cervicalis	MEXICO	Chiapas	None or Unknown	Revolution, 9 mi SE Buena Vista	16.919	-92.0852	1953-03-23	R. C. Bechtel and E. I. Schlinger	Adult Male	UCB	G. Zhang	2012			Google Earth
Other material	Zelus cervicalis	Stål, 1872	UCR_ENT 00034052	Reduviidae	Zelus	cervicalis	MEXICO	Chiapas	None or Unknown	3 mi E Tuxtla Gutierrez	16.7496	-93.0711	1953-03-13	R. C. Bechtel and E. I. Schlinger	Adult Female	UCB	G. Zhang	2012			Google Earth
Other material	Zelus cervicalis	Stål, 1872	UCR_ENT 00034053	Reduviidae	Zelus	cervicalis	MEXICO	Chiapas	None or Unknown	3 mi E Tuxtla Gutierrez	16.7496	-93.0711	1953-03-13	R. C. Bechtel and E. I. Schlinger	Adult Female	UCB	G. Zhang	2012			Google Earth
Other material	Zelus cervicalis	Stål, 1872	UCR_ENT 00034054	Reduviidae	Zelus	cervicalis	MEXICO	Nayarit	None or Unknown	San Juan Peyotan	22.4	-104.35	1955-08-02	B. Malkin	Adult Female	UCB	G. Zhang	2012			Gazetteer
Other material	Zelus cervicalis	Stål, 1872	UCR_ENT 00034055	Reduviidae	Zelus	cervicalis	MEXICO	Nayarit	None or Unknown	San Juan Peyotan	22.4	-104.35	1955-08-02	B. Malkin	Adult Female	UCB	G. Zhang	2012			Gazetteer
Other material	Zelus cervicalis	Stål, 1872	UCR_ENT 00034056	Reduviidae	Zelus	cervicalis	MEXICO	Nayarit	None or Unknown	San Juan Peyotan	22.4	-104.35	1955-08-02	B. Malkin	Adult Female	UCB	G. Zhang	2012			Gazetteer
Other material	Zelus cervicalis	Stål, 1872	UCR_ENT 00034057	Reduviidae	Zelus	cervicalis	MEXICO	Nayarit	None or Unknown	Jesus Maria	22.2558	-104.517	1955-07-06	B. Malkin	Adult Female	UCB	G. Zhang	2012			Google Earth
Other material	Zelus cervicalis	Stål, 1872	UCR_ENT 00034058	Reduviidae	Zelus	cervicalis	MEXICO	Nayarit	None or Unknown	Jesus Maria	22.2558	-104.517	1955-07-06	B. Malkin	Adult Female	UCB	G. Zhang	2012			Google Earth
Other material	Zelus cervicalis	Stål, 1872	UCR_ENT 00034059	Reduviidae	Zelus	cervicalis	MEXICO	Nayarit	None or Unknown	Jesus Maria	22.2558	-104.517	1955-07-07	B. Malkin	Adult Male	UCB	G. Zhang	2012			Google Earth
Other material	Zelus cervicalis	Stål, 1872	UCR_ENT 00034061	Reduviidae	Zelus	cervicalis	MEXICO	Nuevo Leon	None or Unknown	10 mi W Linares	24.8578	-99.7249	1976-09-13	J. A. Chemsak, J. Powell, A. & M. Michelbacher	Adult Female	UCB	G. Zhang	2012			Google Earth
Other material	Zelus cervicalis	Stål, 1872	UCR_ENT 00034062	Reduviidae	Zelus	cervicalis	MEXICO	Jalisco	None or Unknown	Estacion de Biologia, Chamela	19.4885	-105.044	1992-07-14 to 1992-07-22	J. A. Chemsak	Adult Female	UCB	G. Zhang	2012			Google Earth	93 m
Other material	Zelus cervicalis	Stål, 1872	UCR_ENT 00034063	Reduviidae	Zelus	cervicalis	MEXICO	Jalisco	None or Unknown	Estacion de Biologia, Chamela	19.4885	-105.044	1992-07-14 to 1992-07-22	J. A. Chemsak	Adult Female	UCB	G. Zhang	2012			Google Earth	93 m
Other material	Zelus cervicalis	Stål, 1872	UCR_ENT 00034064	Reduviidae	Zelus	cervicalis	MEXICO	Jalisco	None or Unknown	Estacion de Biologia, Chamela	19.4885	-105.044	1992-07-14 to 1992-07-22	J. A. Chemsak	Adult Female	UCB	G. Zhang	2012			Google Earth	93 m
Other material	Zelus cervicalis	Stål, 1872	UCR_ENT 00034065	Reduviidae	Zelus	cervicalis	MEXICO	Jalisco	None or Unknown	Estacion de Biologia, Chamela	19.4885	-105.044	1992-07-14 to 1992-07-22	J. A. Chemsak	Adult Male	UCB	G. Zhang	2012			Google Earth	93 m
Other material	Zelus cervicalis	Stål, 1872	UCR_ENT 00034066	Reduviidae	Zelus	cervicalis	MEXICO	Jalisco	None or Unknown	Estacion de Biologia, Chamela	19.4885	-105.044	1992-07-14 to 1992-07-22	J. A. Chemsak	Adult Male	UCB	G. Zhang	2012			Google Earth	93 m
Other material	Zelus cervicalis	Stål, 1872	UCR_ENT 00034067	Reduviidae	Zelus	cervicalis	MEXICO	Oaxaca	None or Unknown	3 mi W Mitla	16.9145	-96.3459	1953-04-09	E. I. Schlinger	Adult Female	UCB	G. Zhang	2012			Google Earth
Other material	Zelus cervicalis	Stål, 1872	UCR_ENT 00034068	Reduviidae	Zelus	cervicalis	MEXICO	Oaxaca	None or Unknown	3 mi W Mitla	16.9145	-96.3459	1953-04-09	E. I. Schlinger	Adult Male	UCB	G. Zhang	2012			Google Earth
Other material	Zelus cervicalis	Stål, 1872	UCR_ENT 00034069	Reduviidae	Zelus	cervicalis	MEXICO	Chiapas	None or Unknown	Sanches Ranch, Las Rosas	16.4	-92.3833	1953-03-12	R. F. Smith and E. I. Schlinger	Adult Female	UCB	G. Zhang	2012
Other material	Zelus cervicalis	Stål, 1872	UCR_ENT 00034070	Reduviidae	Zelus	cervicalis	MEXICO	Guerrero	None or Unknown	6 mi W of Iguala	18.3528	-99.6284	1981-08-19	J. Chemsak & A. & M. Michelbacher	Adult Female	UCB	G. Zhang	2012			Google Earth	1209 m
Other material	Zelus cervicalis	Stål, 1872	UCR_ENT 00034071	Reduviidae	Zelus	cervicalis	MEXICO	Oaxaca	None or Unknown	3 mi W Mitla	16.9145	-96.3459	1953-04-09	E. I. Schlinger	Adult Male	UCB	G. Zhang	2012			Google Earth
Other material	Zelus cervicalis	Stål, 1872	UCR_ENT 00034072	Reduviidae	Zelus	cervicalis	MEXICO	Oaxaca	None or Unknown	3 mi W Mitla	16.9145	-96.3459	1953-04-09	E. I. Schlinger	Adult Male	UCB	G. Zhang	2012			Google Earth
Other material	Zelus cervicalis	Stål, 1872	UCR_ENT 00034073	Reduviidae	Zelus	cervicalis	MEXICO	Nayarit	None or Unknown	Jesus Maria	22.2558	-104.517	1955-07-26	B. Malkin	Adult Male	UCB	G. Zhang	2012			Google Earth
Other material	Zelus cervicalis	Stål, 1872	UCR_ENT 00034074	Reduviidae	Zelus	cervicalis	MEXICO	Nayarit	None or Unknown	Jesus Maria	22.2558	-104.517	1955-06-26	B. Malkin	Adult Male	UCB	G. Zhang	2012			Google Earth
Other material	Zelus cervicalis	Stål, 1872	UCR_ENT 00034075	Reduviidae	Zelus	cervicalis	MEXICO	Puebla	None or Unknown	11 mi SE of Acatlan	18.0869	-97.9309	1952-07-10	E. E. Gilbert and C. D. MacNeil	Adult Male	UCB	G. Zhang	2012			GeoLocate Software
Other material	Zelus cervicalis	Stål, 1872	UCR_ENT 00034076	Reduviidae	Zelus	cervicalis	MEXICO	Puebla	None or Unknown	11 mi SE of Acatlan	18.0869	-97.9309	1952-07-10	E. E. Gilbert and C. D. MacNeil	Adult Male	UCB	G. Zhang	2012			GeoLocate Software
Other material	Zelus cervicalis	Stål, 1872	UCR_ENT 00034077	Reduviidae	Zelus	cervicalis	MEXICO	Puebla	None or Unknown	11 mi SE of Acatlan	18.0869	-97.9309	1952-07-10	E. E. Gilbert and C. D. MacNeil	Adult Female	UCB	G. Zhang	2012			GeoLocate Software
Other material	Zelus cervicalis	Stål, 1872	UCR_ENT 00034078	Reduviidae	Zelus	cervicalis	MEXICO	Puebla	None or Unknown	11 mi SE of Acatlan	18.0869	-97.9309	1952-07-10	E. E. Gilbert and C. D. MacNeil	Adult Female	UCB	G. Zhang	2012			GeoLocate Software
Other material	Zelus cervicalis	Stål, 1872	UCR_ENT 00034079	Reduviidae	Zelus	cervicalis	MEXICO	Michoacan	None or Unknown	11 mi E of Apatzingan	19	-102.21	1954-08-20	E. G. Lindsay, J. W. MacSwain and R. F. Smith	Adult Male	UCB	G. Zhang	2012			Google Earth
Other material	Zelus cervicalis	Stål, 1872	UCR_ENT 00034080	Reduviidae	Zelus	cervicalis	MEXICO	Michoacan	None or Unknown	11 mi E of Apatzingan	19	-102.21	1954-08-20	E. G. Lindsay, J. W. MacSwain and R. F. Smith	Adult Male	UCB	G. Zhang	2012			Google Earth
Other material	Zelus cervicalis	Stål, 1872	UCR_ENT 00034081	Reduviidae	Zelus	cervicalis	MEXICO	Michoacan	None or Unknown	11 mi E of Apatzingan	19	-102.21	1954-08-20	E. G. Lindsay, J. W. MacSwain and R. F. Smith	Adult Female	UCB	G. Zhang	2012			Google Earth
Other material	Zelus cervicalis	Stål, 1872	UCR_ENT 00034082	Reduviidae	Zelus	cervicalis	MEXICO	Michoacan	None or Unknown	11 mi E of Apatzingan	19	-102.21	1954-08-20	E. G. Lindsay, J. W. MacSwain and R. F. Smith	Adult Female	UCB	G. Zhang	2012			Google Earth
Other material	Zelus cervicalis	Stål, 1872	UCR_ENT 00034083	Reduviidae	Zelus	cervicalis	MEXICO	Chiapas	None or Unknown	2 mi SE Revolution	16.8985	-92.0638	1953-03-23	R. C. Bechtel and E. I. Schlinger	Adult Female	UCB	G. Zhang	2012			Google Earth
Other material	Zelus cervicalis	Stål, 1872	UCR_ENT 00034084	Reduviidae	Zelus	cervicalis	MEXICO	Chiapas	None or Unknown	2 mi SE Revolution	16.8985	-92.0638	1953-03-23	R. C. Bechtel and E. I. Schlinger	Adult Male	UCB	G. Zhang	2012			Google Earth
Other material	Zelus cervicalis	Stål, 1872	UCR_ENT 00034085	Reduviidae	Zelus	cervicalis	MEXICO	Chiapas	None or Unknown	2 mi SW Guadelupe Atodia	15.679	-92.1834	1953-03-24	R. C. Bechtel and E. I. Schlinger	Adult Female	UCB	G. Zhang	2012			Google Earth
Other material	Zelus cervicalis	Stål, 1872	UCR_ENT 00034086	Reduviidae	Zelus	cervicalis	MEXICO	Chiapas	None or Unknown	2 mi SE Revolution	16.8985	-92.0638	1953-03-23	E. I. Schlinger	Adult Male	UCB	G. Zhang	2012			Google Earth
Other material	Zelus cervicalis	Stål, 1872	UCR_ENT 00034087	Reduviidae	Zelus	cervicalis	MEXICO	Chiapas	None or Unknown	2 mi SE Revolution	16.8985	-92.0638	1953-03-23	E. I. Schlinger	Adult Male	UCB	G. Zhang	2012			Google Earth
Other material	Zelus cervicalis	Stål, 1872	UCR_ENT 00034088	Reduviidae	Zelus	cervicalis	MEXICO	Chiapas	None or Unknown	2 mi SW Guadelupe Atodia	15.679	-92.1834	1953-03-24	R. C. Bechtel and E. I. Schlinger	Adult Male	UCB	G. Zhang	2012			Google Earth
Other material	Zelus cervicalis	Stål, 1872	UCR_ENT 00034089	Reduviidae	Zelus	cervicalis	MEXICO	Chiapas	None or Unknown	2 mi SE Revolution	16.8985	-92.0638	1953-03-23	E. I. Schlinger	Adult Male	UCB	G. Zhang	2012			Google Earth
Other material	Zelus cervicalis	Stål, 1872	UCR_ENT 00034090	Reduviidae	Zelus	cervicalis	MEXICO	Chiapas	None or Unknown	2 mi SE Revolution	16.8985	-92.0638	1953-03-23	R. C. Bechtel and E. I. Schlinger	Adult Male	UCB	G. Zhang	2012			Google Earth
Other material	Zelus cervicalis	Stål, 1872	UCR_ENT 00034091	Reduviidae	Zelus	cervicalis	MEXICO	Nayarit	None or Unknown	Arroyo Santiago nr. Jesus Maria	22.3165	-104.34	1955-07-05	B. Malkin	Adult Female	UCB	G. Zhang	2012			Google Earth
Other material	Zelus cervicalis	Stål, 1872	UCR_ENT 00034093	Reduviidae	Zelus	cervicalis	MEXICO	Nayarit	None or Unknown	Arroyo Santiago nr. Jesus Maria	22.3165	-104.34	1955-07-05	B. Malkin	Adult Male	UCB	G. Zhang	2012			Google Earth
Other material	Zelus cervicalis	Stål, 1872	UCR_ENT 00034094	Reduviidae	Zelus	cervicalis	MEXICO	Nayarit	None or Unknown	Arroyo Santiago nr. Jesus Maria	22.3165	-104.34	1955-07-05	B. Malkin	Adult Male	UCB	G. Zhang	2012			Google Earth
Other material	Zelus cervicalis	Stål, 1872	UCR_ENT 00034095	Reduviidae	Zelus	cervicalis	USA	Arizona	Cochise	Tex Canyon, Chiricahua Mts.	31.654	-109.309	1927-08-22	J. A. Kusche	Adult Female	UCB	G. Zhang	2012			Gazetteer	1829 m
Other material	Zelus cervicalis	Stål, 1872	UCR_ENT 00034096	Reduviidae	Zelus	cervicalis	USA	Arizona	Cochise	Chiricahua Mountains	31.5922	-109.24	1935-10-14	Bryant	Adult Female	UCB	G. Zhang	2012
Other material	Zelus cervicalis	Stål, 1872	UCR_ENT 00034097	Reduviidae	Zelus	cervicalis	USA	Texas	Harris	Houston	29.7631	-95.3631	1957-08-11	J. M. Burns	Adult Female	UCB	G. Zhang	2012
Other material	Zelus cervicalis	Stål, 1872	UCR_ENT 00034098	Reduviidae	Zelus	cervicalis	USA	Texas	Kimble	7 mi W Harper	30.2979	-99.3614	1975-09-18	J. Chemsak & J. Powell	Adult Male	UCB	G. Zhang	2012			Google Earth
Other material	Zelus cervicalis	Stål, 1872	UCR_ENT 00034099	Reduviidae	Zelus	cervicalis	USA	Texas	Kimble	7 mi W Harper	30.2979	-99.3614	1975-09-18	J. Chemsak & J. Powell	Adult Male	UCB	G. Zhang	2012			Google Earth
Other material	Zelus cervicalis	Stål, 1872	UCR_ENT 00034100	Reduviidae	Zelus	cervicalis	USA	Georgia	Cobb	Lost Mount	33.9475	-84.6977	1913-07-13	Unknown	Adult sex unknown	UCB	G. Zhang	2012			Google Earth
Other material	Zelus cervicalis	Stål, 1872	UCR_ENT 00034101	Reduviidae	Zelus	cervicalis	USA	Florida	Putnam	Crescent City	29.43	-81.5108	1908-04-01	Van Duzee	Adult sex unknown	UCB	G. Zhang	2012			Gazetteer
Other material	Zelus cervicalis	Stål, 1872	UCR_ENT 00034102	Reduviidae	Zelus	cervicalis	USA	Louisiana	Jefferson	Grand Isle State Park	29.2587	-89.9576	1984-09-08 to 1984-09-09	C. B. Barr	Adult Male	UCB	G. Zhang	2012			Google Earth
Other material	Zelus cervicalis	Stål, 1872	UCR_ENT 00034103	Reduviidae	Zelus	cervicalis	USA	Mississippi	Hancock	Hwy 90, 3 mi E La. & Miss. State Line	30.2609	-89.5718	1965-07-07	L. and C. W. O'Brien	Adult Female	UCB	G. Zhang	2012			Gazetteer
Other material	Zelus cervicalis	Stål, 1872	UCR_ENT 00034104	Reduviidae	Zelus	cervicalis	USA	North Carolina	Orange	Orange County	36.0668	-79.1164	1987-10-05	S. Y. Lee	Adult Male	UCB	G. Zhang	2012			Gazetteer
Other material	Zelus cervicalis	Stål, 1872	UCR_ENT 00034105	Reduviidae	Zelus	cervicalis	USA	Mississippi	Lafayette	11 mi NE Oxford	34.4123	-89.3604	1994-09-15	M. Caterino	Adult Male	UCB	G. Zhang	2012			Google Earth
Other material	Zelus cervicalis	Stål, 1872	UCR_ENT 00034106	Reduviidae	Zelus	cervicalis	USA	North Carolina	Dare	S of Salvo	35.5402	-75.4729	1975-06-11	P. Opler & J. Doyen	Adult Female	UCB	G. Zhang	2012			Gazetteer
Other material	Zelus cervicalis	Stål, 1872	UCR_ENT 00034107	Reduviidae	Zelus	cervicalis	COSTA RICA	Guanacaste	none	4 km NW La Canas	10.4515	-85.1215	1971-02-08	Unknown	Adult Male	UCB	G. Zhang	2012			Google Earth
Other material	Zelus cervicalis	Stål, 1872	UCR_ENT 00034108	Reduviidae	Zelus	cervicalis	COSTA RICA	Guanacaste	none	4 km NW La Canas	10.4515	-85.1215	1971-02-08	Unknown	Adult Male	UCB	G. Zhang	2012			Google Earth
Other material	Zelus cervicalis	Stål, 1872	UCR_ENT 00034109	Reduviidae	Zelus	cervicalis	COSTA RICA	Guanacaste	none	4 km NW La Canas	10.4515	-85.1215	1971-02-08	Unknown	Adult Male	UCB	G. Zhang	2012			Google Earth
Other material	Zelus cervicalis	Stål, 1872	UCR_ENT 00034110	Reduviidae	Zelus	cervicalis	COSTA RICA	Guanacaste	none	4 km NW La Canas	10.4515	-85.1215	1971-02-08	Unknown	Adult Male	UCB	G. Zhang	2012			Google Earth
Other material	Zelus cervicalis	Stål, 1872	UCR_ENT 00034111	Reduviidae	Zelus	cervicalis	COSTA RICA	Guanacaste	none	4 km NW La Canas	10.4515	-85.1215	1971-02-08	Unknown	Adult Male	UCB	G. Zhang	2012			Google Earth
Other material	Zelus cervicalis	Stål, 1872	UCR_ENT 00034112	Reduviidae	Zelus	cervicalis	COSTA RICA	Guanacaste	none	4 km NW La Canas	10.4515	-85.1215	1971-02-08	Unknown	Adult Male	UCB	G. Zhang	2012			Google Earth
Other material	Zelus cervicalis	Stål, 1872	UCR_ENT 00034113	Reduviidae	Zelus	cervicalis	COSTA RICA	Guanacaste	none	4 km NW La Canas	10.4515	-85.1215	1971-02-08	Unknown	Adult Female	UCB	G. Zhang	2012			Google Earth
Other material	Zelus cervicalis	Stål, 1872	UCR_ENT 00034114	Reduviidae	Zelus	cervicalis	COSTA RICA	Guanacaste	none	4 km NW La Canas	10.4515	-85.1215	1971-02-08	Unknown	Adult Male	UCB	G. Zhang	2012			Google Earth
Other material	Zelus cervicalis	Stål, 1872	UCR_ENT 00034115	Reduviidae	Zelus	cervicalis	COSTA RICA	Guanacaste	none	4 km NW La Canas	10.4515	-85.1215	1971-02-08	Unknown	Adult Female	UCB	G. Zhang	2012			Google Earth
Other material	Zelus cervicalis	Stål, 1872	UCR_ENT 00034116	Reduviidae	Zelus	cervicalis	COSTA RICA	Guanacaste	none	4 km NW La Canas	10.4515	-85.1215	1971-02-08	Unknown	Adult Male	UCB	G. Zhang	2012			Google Earth
Other material	Zelus cervicalis	Stål, 1872	UCR_ENT 00034117	Reduviidae	Zelus	cervicalis	COSTA RICA	Guanacaste	none	4 km NW La Canas	10.4515	-85.1215	1971-02-08	Unknown	Adult Female	UCB	G. Zhang	2012			Google Earth
Other material	Zelus cervicalis	Stål, 1872	UCR_ENT 00034118	Reduviidae	Zelus	cervicalis	COSTA RICA	Guanacaste	none	4 km NW La Canas	10.4515	-85.1215	1971-02-08	Unknown	Adult Male	UCB	G. Zhang	2012			Google Earth
Other material	Zelus cervicalis	Stål, 1872	UCR_ENT 00034120	Reduviidae	Zelus	cervicalis	COSTA RICA	Guanacaste	none	5 km NW Canas	10.4524	-85.1299	1975-10-14	P. Opler	Adult Male	UCB	G. Zhang	2012			Google Earth
Other material	Zelus cervicalis	Stål, 1872	UCR_ENT 00034121	Reduviidae	Zelus	cervicalis	COSTA RICA	Guanacaste	none	Playas del Coco	10.55	-85.7167	1976-05-13 to 1976-05-18	M. Wasbauer	Adult Female	UCB	G. Zhang	2012			Google Earth
Other material	Zelus cervicalis	Stål, 1872	UCR_ENT 00034122	Reduviidae	Zelus	cervicalis	COSTA RICA	Puntarenas	none	Golfito	8.6407	-83.1686	1965-08-24	S. J. Arnold	Adult Male	UCB	G. Zhang	2012			Google Earth
Other material	Zelus cervicalis	Stål, 1872	UCR_ENT 00034123	Reduviidae	Zelus	cervicalis	MEXICO	Veracruz	None or Unknown	Fortin de las Flores	18.9	-97	1974-07-07 to 1974-07-12	J. A. Chemsak, E. & J. Linsley & J. Powell	Adult sex unknown	UCB	G. Zhang	2012			Gazetteer	1010 m
Other material	Zelus cervicalis	Stål, 1872	UCR_ENT 00034131	Reduviidae	Zelus	cervicalis	MEXICO	Guerrero	None or Unknown	5-7 km NW Taxco	18.5813	-99.6208	1982-09-14	J. A. Powell and J. A. Chemsak	Adult Female	UCB	G. Zhang	2012			Google Earth	1850 m
Other material	Zelus cervicalis	Stål, 1872	UCR_ENT 00034132	Reduviidae	Zelus	cervicalis	MEXICO	Veracruz	None or Unknown	Puente Nacional, 6 mi SE of Rinconada	19.3333	-96.4333	1975-09-30	J. A. Powell and J. A. Chemsak	Adult Female	UCB	G. Zhang	2012			Gazetteer
Other material	Zelus cervicalis	Stål, 1872	UCR_ENT 00038403	Reduviidae	Zelus	cervicalis	MEXICO	Sinaloa	None or Unknown	3 mi E of Villa Union	23.2	-106.186	1972-07-24	J. and M. A. Chemsak, A. and M. Michelbacher	Adult Male	UCB	G. Zhang	2012			GeoLocate Software
Other material	Zelus cervicalis	Stål, 1872	UCR_ENT 00036537	Reduviidae	Zelus	cervicalis	MEXICO	Nayarit	None or Unknown	San Blas	21.5333	-104.933	1969-12-30	D. L. Briggs	Adult Male	UCD	G. Zhang	2012
Other material	Zelus cervicalis	Stål, 1872	UCR_ENT 00036538	Reduviidae	Zelus	cervicalis	MEXICO	Sonora	None or Unknown	13 km W of Alamos	27.7	-109.732	1975-09-01	B. Villegas	Adult Male	UCD	G. Zhang	2012
Other material	Zelus cervicalis	Stål, 1872	UCR_ENT 00036539	Reduviidae	Zelus	cervicalis	MEXICO	Sonora	None or Unknown	13 km W of Alamos	27.7	-109.732	1975-09-01	B. Villegas	Adult Male	UCD	G. Zhang	2012
Other material	Zelus cervicalis	Stål, 1872	UCR_ENT 00036540	Reduviidae	Zelus	cervicalis	MEXICO	Sonora	None or Unknown	13 km W of Alamos	27.7	-109.732	1975-09-01	B. Villegas	Adult Male	UCD	G. Zhang	2012
Other material	Zelus cervicalis	Stål, 1872	UCR_ENT 00036541	Reduviidae	Zelus	cervicalis	MEXICO	Sonora	None or Unknown	13 km W of Alamos	27.7	-109.732	1975-09-01	B. Villegas	Adult Male	UCD	G. Zhang	2012
Other material	Zelus cervicalis	Stål, 1872	UCR_ENT 00036542	Reduviidae	Zelus	cervicalis	MEXICO	Sonora	None or Unknown	13 km W of Alamos	27.7	-109.732	1975-09-01	B. Villegas	Adult Male	UCD	G. Zhang	2012
Other material	Zelus cervicalis	Stål, 1872	UCR_ENT 00036543	Reduviidae	Zelus	cervicalis	MEXICO	Sonora	None or Unknown	13 km W of Alamos	27.7	-109.732	1975-09-01	B. Villegas	Adult Male	UCD	G. Zhang	2012
Other material	Zelus cervicalis	Stål, 1872	UCR_ENT 00036544	Reduviidae	Zelus	cervicalis	MEXICO	Sonora	None or Unknown	13 km W of Alamos	27.7	-109.732	1975-09-01	B. Villegas	Adult Male	UCD	G. Zhang	2012
Other material	Zelus cervicalis	Stål, 1872	UCR_ENT 00036545	Reduviidae	Zelus	cervicalis	MEXICO	Sonora	None or Unknown	13 km W of Alamos	27.7	-109.732	1975-09-01	B. Villegas	Adult Male	UCD	G. Zhang	2012
Other material	Zelus cervicalis	Stål, 1872	UCR_ENT 00036546	Reduviidae	Zelus	cervicalis	MEXICO	Sonora	None or Unknown	13 km W of Alamos	27.7	-109.732	1975-09-01	B. Villegas	Adult Male	UCD	G. Zhang	2012
Other material	Zelus cervicalis	Stål, 1872	UCR_ENT 00036547	Reduviidae	Zelus	cervicalis	MEXICO	Sonora	None or Unknown	13 km W of Alamos	27.7	-109.732	1975-09-01	B. Villegas	Adult Male	UCD	G. Zhang	2012
Other material	Zelus cervicalis	Stål, 1872	UCR_ENT 00036548	Reduviidae	Zelus	cervicalis	MEXICO	Sonora	None or Unknown	13 km W of Alamos	27.7	-109.732	1975-09-01	B. Villegas	Adult Male	UCD	G. Zhang	2012
Other material	Zelus cervicalis	Stål, 1872	UCR_ENT 00036549	Reduviidae	Zelus	cervicalis	MEXICO	Sonora	None or Unknown	13 km W of Alamos	27.7	-109.732	1975-09-01	B. Villegas	Adult Male	UCD	G. Zhang	2012
Other material	Zelus cervicalis	Stål, 1872	UCR_ENT 00036550	Reduviidae	Zelus	cervicalis	MEXICO	Puebla	None or Unknown	5 mi. S of Izucar de Matamoros	18.5342	-98.429	1963-08-01	F.D. Parker	Adult Male	UCD	G. Zhang	2012			Google Earth
Other material	Zelus cervicalis	Stål, 1872	UCR_ENT 00036551	Reduviidae	Zelus	cervicalis	MEXICO	Puebla	None or Unknown	5 mi. S of Izucar de Matamoros	18.5342	-98.429	1963-08-01	F.D. Parker	Adult Male	UCD	G. Zhang	2012			Google Earth
Other material	Zelus cervicalis	Stål, 1872	UCR_ENT 00036552	Reduviidae	Zelus	cervicalis	USA	Georgia	Liberty	Saint Catherines Island, South Beach area	31.6567	-81.1517	1974-06-27	R.O. Schuster	Adult Male	UCD	G. Zhang	2012
Other material	Zelus cervicalis	Stål, 1872	UCR_ENT 00036553	Reduviidae	Zelus	cervicalis	USA	Georgia	Liberty	Saint Catherines Island, South Beach area	31.6567	-81.1517	1974-06-27	R.O. Schuster	Adult Male	UCD	G. Zhang	2012
Other material	Zelus cervicalis	Stål, 1872	UCR_ENT 00036554	Reduviidae	Zelus	cervicalis	USA	Georgia	Liberty	Saint Catherines Island, South Beach area	31.6567	-81.1517	1974-06-27	R.O. Schuster	Adult Male	UCD	G. Zhang	2012
Other material	Zelus cervicalis	Stål, 1872	UCR_ENT 00036555	Reduviidae	Zelus	cervicalis	USA	Georgia	Liberty	Saint Catherines Island, North Beach	31.6567	-81.1517	1974-06-25	R. O. Schuster and E. C. Toftner	Adult Male	UCD	G. Zhang	2012
Other material	Zelus cervicalis	Stål, 1872	UCR_ENT 00036556	Reduviidae	Zelus	cervicalis	USA	Arizona	Pima	Santa Rita Mountains, Madera Canyon	31.7278	-110.881	1957-07-10	Stange & Harding	Adult Male	UCD	G. Zhang	2012			Google Earth	1466 m
Other material	Zelus cervicalis	Stål, 1872	UCR_ENT 00036557	Reduviidae	Zelus	cervicalis	USA	Oklahoma	Bryan	Lake Texoma near Willis	33.8914	-96.8297	1965-06-01	Unknown	Adult Male	UCD	G. Zhang	2012			Google Earth
Other material	Zelus cervicalis	Stål, 1872	UCR_ENT 00036558	Reduviidae	Zelus	cervicalis	USA	Florida	Alachua	Gainesville	29	-82	1960-08-28	L.A. Stange	Adult Male	UCD	G. Zhang	2012			Label	25 m
Other material	Zelus cervicalis	Stål, 1872	UCR_ENT 00036559	Reduviidae	Zelus	cervicalis	MEXICO	Jalisco	None or Unknown	4 mi. S of Guadalajara	20.512	-103.284	1963-07-10	F.D. Parker	Adult Male	UCD	G. Zhang	2012			Google Earth
Other material	Zelus cervicalis	Stål, 1872	UCR_ENT 00036560	Reduviidae	Zelus	cervicalis	MEXICO	Jalisco	None or Unknown	8 mi.S of Guadalajara	20.4783	-103.266	1963-07-10	F.D. Parker	Adult Female	UCD	G. Zhang	2012			Google Earth
Other material	Zelus cervicalis	Stål, 1872	UCR_ENT 00036561	Reduviidae	Zelus	cervicalis	MEXICO	Sonora	None or Unknown	13 km W of Alamos	27.7	-109.732	1975-09-01	B. Villegas	Adult Female	UCD	G. Zhang	2012
Other material	Zelus cervicalis	Stål, 1872	UCR_ENT 00036562	Reduviidae	Zelus	cervicalis	MEXICO	Sonora	None or Unknown	13 km W of Alamos	27.7	-109.732	1975-09-01	B. Villegas	Adult Female	UCD	G. Zhang	2012
Other material	Zelus cervicalis	Stål, 1872	UCR_ENT 00036563	Reduviidae	Zelus	cervicalis	MEXICO	Sonora	None or Unknown	13 km W of Alamos	27.7	-109.732	1975-09-01	B. Villegas	Adult Female	UCD	G. Zhang	2012
Other material	Zelus cervicalis	Stål, 1872	UCR_ENT 00036564	Reduviidae	Zelus	cervicalis	MEXICO	Sonora	None or Unknown	13 km W of Alamos	27.7	-109.732	1975-09-01	B. Villegas	Adult Female	UCD	G. Zhang	2012
Other material	Zelus cervicalis	Stål, 1872	UCR_ENT 00036565	Reduviidae	Zelus	cervicalis	MEXICO	Sonora	None or Unknown	13 km W of Alamos	27.7	-109.732	1975-09-01	B. Villegas	Adult Female	UCD	G. Zhang	2012
Other material	Zelus cervicalis	Stål, 1872	UCR_ENT 00036566	Reduviidae	Zelus	cervicalis	USA	Georgia	Liberty	Saint Catherines Island, South Beach area	31.6567	-81.1517	1974-06-27	R.O. Schuster	Adult Female	UCD	G. Zhang	2012
Other material	Zelus cervicalis	Stål, 1872	UCR_ENT 00036567	Reduviidae	Zelus	cervicalis	USA	Georgia	Liberty	Saint Catherines Island, South Beach area	31.6567	-81.1517	1974-06-27	R.O. Schuster	Adult Female	UCD	G. Zhang	2012
Other material	Zelus cervicalis	Stål, 1872	UCR_ENT 00036568	Reduviidae	Zelus	cervicalis	USA	Georgia	Liberty	Saint Catherines Island, South Beach area	31.6567	-81.1517	1974-06-27	R.O. Schuster	Adult Female	UCD	G. Zhang	2012
Other material	Zelus cervicalis	Stål, 1872	UCR_ENT 00036569	Reduviidae	Zelus	cervicalis	MEXICO	Sinaloa	None or Unknown	5 mi N of Mazatlan	23.2889	-106.417	1968-12-27	D.L. Briggs	Adult Female	UCD	G. Zhang	2012
Other material	Zelus cervicalis	Stål, 1872	UCR_ENT 00036570	Reduviidae	Zelus	cervicalis	MEXICO	Sinaloa	None or Unknown	6 mi NW of Choix	26.769	-108.394	1968-08-06	T. A. Sears, R. C. Gardner, C. S. Glaser	Adult Female	UCD	G. Zhang	2012			Google Earth
Other material	Zelus cervicalis	Stål, 1872	UCR_ENT 00036571	Reduviidae	Zelus	cervicalis	MEXICO	Puebla	None or Unknown	5 mi. S of Izucar de Matamoros	18.5342	-98.429	1963-08-01	F.D. Parker	Adult Female	UCD	G. Zhang	2012			Google Earth
Other material	Zelus cervicalis	Stål, 1872	UCR_ENT 00037119	Reduviidae	Zelus	cervicalis	MEXICO	Sonora	None or Unknown	13 km W of Alamos	27.7	-109.732	1975-09-01	B. Villegas	Adult sex unknown	UCD	G. Zhang	2012
Other material	Zelus cervicalis	Stål, 1872	UCR_ENT 00037120	Reduviidae	Zelus	cervicalis	MEXICO	Jalisco	None or Unknown	Puerto Vallarta	20.622	-105.228	1977-04-22	D.G. Denning	Adult sex unknown	UCD	G. Zhang	2012			Google Earth
Other material	Zelus cervicalis	Stål, 1872	UCR_ENT 00037142	Reduviidae	Zelus	cervicalis	MEXICO	Sinaloa	None or Unknown	6 mi NW of Choix	26.769	-108.394	1968-08-06	T. A. Sears, R. C. Gardner, C. S. Glaser	Adult Male	UCD	G. Zhang	2012			Google Earth
Other material	Zelus cervicalis	Stål, 1872	UCR_ENT 00037143	Reduviidae	Zelus	cervicalis	MEXICO	Chihuahua	None or Unknown	6 mi S of Villa Matamoros	26.6633	-105.583	1967-08-08	R. C. Gardner, C. R. Kovacic, & K. Lorenzen	Adult Male	UCD	G. Zhang	2012
Other material	Zelus cervicalis	Stål, 1872	UCR_ENT 00037144	Reduviidae	Zelus	cervicalis	MEXICO	Chihuahua	None or Unknown	5 mi S Hidalgo del Parral	26.8886	-105.666	1967-08-26	R.C. Gardner&C.R.Kovacic&K.Lorenzen	Adult Female	UCD	G. Zhang	2012			Google Earth
Other material	Zelus cervicalis	Stål, 1872	UCR_ENT 00037145	Reduviidae	Zelus	cervicalis	MEXICO	Sinaloa	None or Unknown	6 mi NW of Choix	26.769	-108.394	1968-08-06	T. A. Sears, R. C. Gardner, C. S. Glaser	Adult Male	UCD	G. Zhang	2012			Google Earth
Other material	Zelus cervicalis	Stål, 1872	UCR_ENT 00037217	Reduviidae	Zelus	cervicalis	MEXICO	Sinaloa	None or Unknown	6 mi NW of Choix	26.769	-108.394	1968-08-06	T. A. Sears, R. C. Gardner, C. S. Glaser	Adult Female	UCD	G. Zhang	2012			Google Earth
Other material	Zelus cervicalis	Stål, 1872	UCR_ENT 00037218	Reduviidae	Zelus	cervicalis	MEXICO	Sinaloa	None or Unknown	6 mi NW of Choix	26.769	-108.394	1968-08-06	T. A. Sears, R. C. Gardner, C. S. Glaser	Adult sex unknown	UCD	G. Zhang	2012			Google Earth
Other material	Zelus cervicalis	Stål, 1872	UCR_ENT 00001134	Reduviidae	Zelus	cervicalis	USA	Mississippi	Perry	RIchton	31.3493	-88.94	1983-09-23	John D. Pinto	Adult Male	UCR	G. Zhang	2012			Gazetteer
Other material	Zelus cervicalis	Stål, 1872	UCR_ENT 00001135	Reduviidae	Zelus	cervicalis	USA	Virginia	Virginia Beach	Cape Henry	37.049	-78.57	1932-10-09	L. D. Anderson	Adult Female	UCR	G. Zhang	2012			GeoLocate Software
Other material	Zelus cervicalis	Stål, 1872	UCR_ENT 00001136	Reduviidae	Zelus	cervicalis	USA	Mississippi	Perry	RIchton	31.3493	-88.94	1983-09-23	John D. Pinto	Adult Female	UCR	G. Zhang	2012			Gazetteer
Other material	Zelus cervicalis	Stål, 1872	UCR_ENT 00001137	Reduviidae	Zelus	cervicalis	USA	Texas	Bexar	San Antonio	29.4341	-98.4915	1968-10-23	A. & A. Gillogly	Adult sex unknown	UCR	G. Zhang	2012			Google Earth	201 m
Other material	Zelus cervicalis	Stål, 1872	UCR_ENT 00001138	Reduviidae	Zelus	cervicalis	MEXICO	Oaxaca	None or Unknown	Tehuantepec	16.3333	-95.2333	1952-01-01	T.J. Condit	Adult Male	UCR	G. Zhang	2012
Other material	Zelus cervicalis	Stål, 1872	UCR_ENT 00001139	Reduviidae	Zelus	cervicalis	MEXICO	Oaxaca	None or Unknown	Tehuantepec	16.3333	-95.2333	1952-01-01	T.J. Condit	Adult Male	UCR	G. Zhang	2012
Other material	Zelus cervicalis	Stål, 1872	UCR_ENT 00001140	Reduviidae	Zelus	cervicalis	MEXICO	Nayarit	None or Unknown	San Blas	21.5333	-104.933	1952-03-01	L. J. Condit	Adult Female	UCR	G. Zhang	2012
Other material	Zelus cervicalis	Stål, 1872	UCR_ENT 00001141	Reduviidae	Zelus	cervicalis	USA	South Carolina	Horry	Myrtle Beach	33.6891	-78.8866	1941-07-25	A. L. Melander	Adult Female	UCR	G. Zhang	2012			Gazetteer
Other material	Zelus cervicalis	Stål, 1872	UCR_ENT 00001142	Reduviidae	Zelus	cervicalis	USA	South Carolina	Horry	Myrtle Beach	33.6891	-78.8866	1941-07-25	A. L. Melander	Adult Female	UCR	G. Zhang	2012			Gazetteer
Other material	Zelus cervicalis	Stål, 1872	UCR_ENT 00001143	Reduviidae	Zelus	cervicalis	USA	North Carolina	Wake	Raleigh	35.7719	-78.6389	1907-05-01	R. Woglum	Adult Male	UCR	G. Zhang	2012
Other material	Zelus cervicalis	Stål, 1872	UCR_ENT 00001144	Reduviidae	Zelus	cervicalis	USA	South Carolina	Horry	Myrtle Beach	33.6891	-78.8866	1941-07-27	A. L. Melander	Adult Male	UCR	G. Zhang	2012			Gazetteer
Other material	Zelus cervicalis	Stål, 1872	UCR_ENT 00001225	Reduviidae	Zelus	cervicalis	USA	Arizona	Santa Cruz	Pena Blanca Lake Rd, lower parking lot [CW_A6]	31.4004	-111.091	2007-09-25	Weirauch, Soto, Hwang, Zhang	Adult Male	UCR	G. Zhang	2012	Primary DNA voucher RCW_342. Genitalia dissected, habitus and genitalia photos taken	Sweep Netting		1181 m
Other material	Zelus cervicalis	Stål, 1872	UCR_ENT 00001287	Reduviidae	Zelus	cervicalis	MEXICO	Oaxaca	None or Unknown	Tehuantepec	16.3333	-95.2333	1952-01-01	T.J. Condit	Adult Female	UCR	G. Zhang	2012
Other material	Zelus cervicalis	Stål, 1872	UCR_ENT 00001505	Reduviidae	Zelus	cervicalis	MEXICO	Sonora	None or Unknown	46 km W of Chihuahua-Sonora border, at Puente el Castillo	28.4	-108.796	2005-05-01	Schwartz, Weirauch, Cervantes	Adult Male	UCR	G. Zhang	2012	Primary DNA voucher RCW_115		GPS	1330 m
Other material	Zelus cervicalis	Stål, 1872	UCR_ENT 00034545	Reduviidae	Zelus	cervicalis	USA	Louisiana	Orleans	New Orleans	29.9546	-90.0751	1921-09-05	W.A. Riley	Adult Male	UMSP	G. Zhang	2012			Gazetteer
Other material	Zelus cervicalis	Stål, 1872	UCR_ENT 00034546	Reduviidae	Zelus	cervicalis	USA	Louisiana	Orleans	New Orleans	29.9546	-90.0751	1921-09-05	W.A. Riley	Adult Female	UMSP	G. Zhang	2012			Gazetteer
Other material	Zelus cervicalis	Stål, 1872	UCR_ENT 00034547	Reduviidae	Zelus	cervicalis	HONDURAS	Francisco Morazan	None	Cedros	14.5833	-87.25	1976-11-11	Unknown	Adult Female	UMSP	G. Zhang	2012			Gazetteer
Other material	Zelus cervicalis	Stål, 1872	UCR_ENT 00034548	Reduviidae	Zelus	cervicalis	HONDURAS	Francisco Morazan	None	Cedros	14.5833	-87.25	1976-11-07	Unknown	Adult Female	UMSP	G. Zhang	2012			Gazetteer
Other material	Zelus cervicalis	Stål, 1872	UCR_ENT 00068831	Reduviidae	Zelus	cervicalis	HONDURAS	Francisco Morazan	None	Cedros	14.5833	-87.25	1976-10-28	Unknown	Adult Female	UMSP	G. Zhang	2012			Gazetteer
Other material	Zelus cervicalis	Stål, 1872	UCR_ENT 00068832	Reduviidae	Zelus	cervicalis	USA	Mississippi	Forrest	Hattiesburg	31.3269	-89.29	1941-04-18	S. S. Easter	Adult sex unknown	UMSP	G. Zhang	2012			GeoLocate Software
Other material	Zelus cervicalis	Stål, 1872	UCR_ENT 00009256	Reduviidae	Zelus	cervicalis	MEXICO	Nayarit	None or Unknown	San Blas	21.5333	-104.933	1972-03-11	F. Parker, D. Miller	Adult Male	USNM	G. Zhang	2012
Other material	Zelus cervicalis	Stål, 1872	UCR_ENT 00009257	Reduviidae	Zelus	cervicalis	MEXICO	Quintana Roo	None or Unknown	14 km S of Punta Cancun	21.0353	-86.8031	1990-08-09	R. M. Baranowski	Adult Male	USNM	G. Zhang	2012			Google Earth
Other material	Zelus cervicalis	Stål, 1872	UCR_ENT 00009258	Reduviidae	Zelus	cervicalis	MEXICO	Oaxaca	None or Unknown	36.3km N Oaxaca, Hwy 190			1973-05-21	Erwin & Hevel Central American Expedition	Adult Male	USNM	G. Zhang	2012				1981 m
Other material	Zelus cervicalis	Stål, 1872	UCR_ENT 00009259	Reduviidae	Zelus	cervicalis	GUATEMALA	Jalapa	none	Morales	14.4833	-90.1667	1928-10-01	J. J. White	Adult Male	USNM	G. Zhang	2012	Additional Labels H G Barber Collection 1950		Gazetteer
Other material	Zelus cervicalis	Stål, 1872	UCR_ENT 00009260	Reduviidae	Zelus	cervicalis	GUATEMALA	Jalapa	none	Morales	14.4833	-90.1667	1928-10-01	J. J. White	Adult Female	USNM	G. Zhang	2012	Additional Labels H G Barber Collection 1950		Gazetteer
Other material	Zelus cervicalis	Stål, 1872	UCR_ENT 00009261	Reduviidae	Zelus	cervicalis	MEXICO	Quintana Roo	None or Unknown	14 km S of Punta Cancun	21.0353	-86.8031	1990-08-09	R. M. Baranowski	Adult Female	USNM	G. Zhang	2012			Google Earth
Other material	Zelus cervicalis	Stål, 1872	UCR_ENT 00009329	Reduviidae	Zelus	cervicalis	NICARAGUA	unknown	none	Santa Rosa			1971-06-03	W. Martinez	Adult Male	USNM	G. Zhang	2012	Drake Collection
Other material	Zelus cervicalis	Stål, 1872	UCR_ENT 00009330	Reduviidae	Zelus	cervicalis	VENEZUELA	Guarico	none	Calabozo	8.92219	-67.4283	1975-08-05	John K. Bouseman, Richard B. Selander	Adult Female	USNM	G. Zhang	2012	Drake Collection		Google Earth
Other material	Zelus cervicalis	Stål, 1872	UCR_ENT 00009562	Reduviidae	Zelus	cervicalis	USA	North Carolina	Currituck	Currituck County	36.4153	-75.9265	1935-07-27	J. C. Bridwell	Adult Male	USNM	G. Zhang	2012	Drake Collection		GeoLocate Software
Other material	Zelus cervicalis	Stål, 1872	UCR_ENT 00009563	Reduviidae	Zelus	cervicalis	USA	North Carolina	Brunswick	Southport	33.9214	-78.0206	1916-04-19	H. G. Barber	Adult Male	USNM	G. Zhang	2012	Drake Collection		Gazetteer
Other material	Zelus cervicalis	Stål, 1872	UCR_ENT 00009564	Reduviidae	Zelus	cervicalis	USA	Georgia	Peach	Peach County	32.5666	-83.8333	1939-08-28	W. F. Turner	Adult Male	USNM	G. Zhang	2012	Drake Collection		GeoLocate Software
Other material	Zelus cervicalis	Stål, 1872	UCR_ENT 00009565	Reduviidae	Zelus	cervicalis	USA	Louisiana	St. Landry	Opelousas	30.5333	-92.0814	No date provided	G. R. Pilate	Adult Male	USNM	G. Zhang	2012	Drake Collection		Gazetteer	18 m
Other material	Zelus cervicalis	Stål, 1872	UCR_ENT 00009566	Reduviidae	Zelus	cervicalis	USA	Louisiana	St. Landry	Opelousas	30.5333	-92.0814	No date provided	G. R. Pilate	Adult Male	USNM	G. Zhang	2012	Drake Collection		Gazetteer	18 m
Other material	Zelus cervicalis	Stål, 1872	UCR_ENT 00009567	Reduviidae	Zelus	cervicalis	USA	North Carolina	Currituck	Currituck County	36.4153	-75.9265	1935-07-27	J. C. Bridwell	Adult Female	USNM	G. Zhang	2012	Drake Collection		GeoLocate Software
Other material	Zelus cervicalis	Stål, 1872	UCR_ENT 00009568	Reduviidae	Zelus	cervicalis	USA	Delaware	New Castle	Wilmington	39.75	-75.55	1914-04-07	H. G. Barber	Adult Female	USNM	G. Zhang	2012	Drake Collection		Gazetteer
Other material	Zelus cervicalis	Stål, 1872	UCR_ENT 00009569	Reduviidae	Zelus	cervicalis	USA	South Carolina	Chesterfield	McBee	34.47	-80.26	1931-09-07 to 1931-09-11	S. W. Bromley	Adult Female	USNM	G. Zhang	2012	Drake Collection		Gazetteer
Other material	Zelus cervicalis	Stål, 1872	UCR_ENT 00009570	Reduviidae	Zelus	cervicalis	USA	Georgia	Thomas	Thomasville	30.8	-83.9667	1903-03-15	H. G. Barber	Adult Female	USNM	G. Zhang	2012	Drake Collection		Google Earth
Other material	Zelus cervicalis	Stål, 1872	UCR_ENT 00009571	Reduviidae	Zelus	cervicalis	USA	Georgia	unknown	Brownsterry			1917-06-06	H. G. Barber	Adult Female	USNM	G. Zhang	2012	Drake Collection
Other material	Zelus cervicalis	Stål, 1872	UCR_ENT 00009572	Reduviidae	Zelus	cervicalis	USA	Louisiana	Vernon	Leesville	31.1436	-93.2711	1905-04-28	W. E. Hinds	Adult Female	USNM	G. Zhang	2012	Drake Collection
Other material	Zelus cervicalis	Stål, 1872	UCR_ENT 00009573	Reduviidae	Zelus	cervicalis	USA	Arkansas	Ouachita	Camden	33.58	-92.83	1906-09-18	J. D. Mitchell	Adult Female	USNM	G. Zhang	2012	Drake Collection		Gazetteer
Other material	Zelus cervicalis	Stål, 1872	UCR_ENT 00026090	Reduviidae	Zelus	cervicalis	BELIZE	Belize	None	Mile 32, Western Highway	17.3022	-88.592	1977-08-14	C. and L. O'Brien and G. B. Marshall	Adult Female	USNM	G. Zhang	2012	Drake Collection		Google Earth
Other material	Zelus cervicalis	Stål, 1872	UCR_ENT 00026117	Reduviidae	Zelus	cervicalis	USA	Georgia	Thomas	Thomasville	30.8	-83.9667	1903-03-24	H. G. Barber	Adult Male	USNM	G. Zhang	2012			Google Earth
Other material	Zelus cervicalis	Stål, 1872	UCR_ENT 00026118	Reduviidae	Zelus	cervicalis	MEXICO	Jalisco	None or Unknown	Tepatitlan	20.8167	-102.733	1956-07-08	R. and K. Dreisbach	Adult Male	USNM	G. Zhang	2012			Gazetteer	1847 m
Other material	Zelus cervicalis	Stål, 1872	UCR_ENT 00026119	Reduviidae	Zelus	cervicalis	GUATEMALA	Escuintla	none	Tiquisate (or Tiquizate)	14.2833	-91.3667	1964-11-10	E. J. Hambleton	Adult Male	USNM	G. Zhang	2012		Sweep Netting	Gazetteer
Other material	Zelus cervicalis	Stål, 1872	UCR_ENT 00026120	Reduviidae	Zelus	cervicalis	GUATEMALA	Izabal	none	Bananera	15.4667	-88.8333	1905-04-15	C.N. Ainalie	Adult Male	USNM	G. Zhang	2012			Gazetteer	15 m
Other material	Zelus cervicalis	Stål, 1872	UCR_ENT 00026121	Reduviidae	Zelus	cervicalis	GUATEMALA	Izabal	none	Bananera	15.4667	-88.8333	1905-04-15	C.N. Ainalie	Adult Male	USNM	G. Zhang	2012			Gazetteer	15 m
Other material	Zelus cervicalis	Stål, 1872	UCR_ENT 00029616	Reduviidae	Zelus	cervicalis	USA	Florida	Alachua	Gainesville	29.6516	-82.3248	no date provided	W. F Pennington	Adult Male	USNM	G. Zhang	2012	Bears label 'Gainsville No 16315'		Google Earth
Other material	Zelus cervicalis	Stål, 1872	UCR_ENT 00029617	Reduviidae	Zelus	cervicalis	USA	Florida	Alachua	Gainesville	29.6516	-82.3248	no date provided	W. F Pennington	Adult Male	USNM	G. Zhang	2012	Bears labels 'Gainsville No 16313' and 'Oat field'		Google Earth
Other material	Zelus cervicalis	Stål, 1872	UCR_ENT 00029618	Reduviidae	Zelus	cervicalis	USA	Florida	Alachua	Gainesville	29.6516	-82.3248	no date provided	W. F Pennington	Adult Female	USNM	G. Zhang	2012	Bears labels 'Gainsville No 16314' and 'Oat field'		Google Earth
Other material	Zelus cervicalis	Stål, 1872	UCR_ENT 00029619	Reduviidae	Zelus	cervicalis	USA	Florida	Alachua	Gainesville	29.6516	-82.3248	1916-01-07	W. F Pennington	Adult Female	USNM	G. Zhang	2012			Google Earth
Other material	Zelus cervicalis	Stål, 1872	UCR_ENT 00029620	Reduviidae	Zelus	cervicalis	USA	Florida	Alachua	Gainesville	29.6516	-82.3248	no date provided	W. F Pennington	Adult Female	USNM	G. Zhang	2012	Bears label 'Gainsville No 1347A'		Google Earth
Other material	Zelus cervicalis	Stål, 1872	UCR_ENT 00029621	Reduviidae	Zelus	cervicalis	USA	Florida	Alachua	Gainesville	29.6516	-82.3248	1920-05-13	P. W. Fattig	Adult Female	USNM	G. Zhang	2012	Bears label '1359'		Google Earth
Other material	Zelus cervicalis	Stål, 1872	UCR_ENT 00029622	Reduviidae	Zelus	cervicalis	USA	Florida	Miami-Dade	Paradise Key [Royal Palm State Park]	25.373	-80.6067	1919-02-23	H. S. Barber	Adult Male	USNM	G. Zhang	2012			GeoLocate Software	1 m
Other material	Zelus cervicalis	Stål, 1872	UCR_ENT 00029623	Reduviidae	Zelus	cervicalis	USA	Florida	Miami-Dade	Paradise Key [Royal Palm State Park]	25.373	-80.6067	1919-02-24	H. S. Barber	Adult Male	USNM	G. Zhang	2012			GeoLocate Software	1 m
Other material	Zelus cervicalis	Stål, 1872	UCR_ENT 00029624	Reduviidae	Zelus	cervicalis	USA	Florida	Miami-Dade	Paradise Key [Royal Palm State Park]	25.373	-80.6067	1919-03-10	H. S. Barber	Adult Male	USNM	G. Zhang	2012			GeoLocate Software	1 m
Other material	Zelus cervicalis	Stål, 1872	UCR_ENT 00029625	Reduviidae	Zelus	cervicalis	USA	Florida	Miami-Dade	Paradise Key [Royal Palm State Park]	25.373	-80.6067	1919-02-24	H. S. Barber	Adult Female	USNM	G. Zhang	2012			GeoLocate Software	1 m
Other material	Zelus cervicalis	Stål, 1872	UCR_ENT 00029626	Reduviidae	Zelus	cervicalis	USA	Florida	Seminole	Sanford	28.7884	-81.2544	1925-09-01	E. D. Ball	Adult Male	USNM	G. Zhang	2012			Map - local/regional	12 m
Other material	Zelus cervicalis	Stål, 1872	UCR_ENT 00029627	Reduviidae	Zelus	cervicalis	USA	Florida	Seminole	Sanford	28.7884	-81.2544	1925-09-01	E. D. Ball	Adult Female	USNM	G. Zhang	2012			Map - local/regional	12 m
Other material	Zelus cervicalis	Stål, 1872	UCR_ENT 00029628	Reduviidae	Zelus	cervicalis	USA	Florida	Seminole	Sanford	28.7884	-81.2544	1925-09-01	E. D. Ball	Adult Female	USNM	G. Zhang	2012			Map - local/regional	12 m
Other material	Zelus cervicalis	Stål, 1872	UCR_ENT 00029629	Reduviidae	Zelus	cervicalis	USA	Florida	Pinellas	Dunedin	28.0197	-82.7717	1927-03-21	W.S.B. [W. S. Blatchley]	Adult Male	USNM	G. Zhang	2012			Gazetteer	9 m
Other material	Zelus cervicalis	Stål, 1872	UCR_ENT 00029630	Reduviidae	Zelus	cervicalis	USA	Florida	Pinellas	Dunedin	28.0197	-82.7717	1927-03-21	W.S.B. [W. S. Blatchley]	Adult Male	USNM	G. Zhang	2012			Gazetteer	9 m
Other material	Zelus cervicalis	Stål, 1872	UCR_ENT 00029631	Reduviidae	Zelus	cervicalis	USA	Florida	Pinellas	Dunedin	28.0197	-82.7717	1927-03-21	W.S.B. [W. S. Blatchley]	Adult Female	USNM	G. Zhang	2012			Gazetteer	9 m
Other material	Zelus cervicalis	Stål, 1872	UCR_ENT 00029632	Reduviidae	Zelus	cervicalis	USA	Florida	Pinellas	Dunedin	28.0197	-82.7717	1927-03-21	W.S.B. [W. S. Blatchley]	Adult Female	USNM	G. Zhang	2012			Gazetteer	9 m
Other material	Zelus cervicalis	Stål, 1872	UCR_ENT 00029633	Reduviidae	Zelus	cervicalis	USA	Florida	Miami-Dade	Miami	25.7739	-80.1939	1944-01-23	W. W. Wirth	Adult Male	USNM	G. Zhang	2012			Gazetteer	1 m
Other material	Zelus cervicalis	Stål, 1872	UCR_ENT 00029634	Reduviidae	Zelus	cervicalis	USA	Florida	Miami-Dade	Miami	25.7739	-80.1939	1944-01-23	W. W. Wirth	Adult Male	USNM	G. Zhang	2012			Gazetteer	1 m
Other material	Zelus cervicalis	Stål, 1872	UCR_ENT 00029635	Reduviidae	Zelus	cervicalis	USA	Florida	Miami-Dade	Miami	25.7739	-80.1939	1944-01-23	W. W. Wirth	Adult Male	USNM	G. Zhang	2012			Gazetteer	1 m
Other material	Zelus cervicalis	Stål, 1872	UCR_ENT 00029636	Reduviidae	Zelus	cervicalis	USA	Florida	Miami-Dade	Miami	25.7739	-80.1939	1944-01-23	W. W. Wirth	Adult Male	USNM	G. Zhang	2012			Gazetteer	1 m
Other material	Zelus cervicalis	Stål, 1872	UCR_ENT 00029637	Reduviidae	Zelus	cervicalis	USA	Florida	Miami-Dade	Miami	25.7739	-80.1939	1944-01-23	W. W. Wirth	Adult Male	USNM	G. Zhang	2012			Gazetteer	1 m
Other material	Zelus cervicalis	Stål, 1872	UCR_ENT 00029638	Reduviidae	Zelus	cervicalis	USA	Florida	Miami-Dade	Miami	25.7739	-80.1939	1944-01-02	W. W. Wirth	Adult Male	USNM	G. Zhang	2012			Gazetteer	1 m
Other material	Zelus cervicalis	Stål, 1872	UCR_ENT 00029639	Reduviidae	Zelus	cervicalis	USA	Florida	Miami-Dade	Miami	25.7739	-80.1939	1944-01-03	W. W. Wirth	Adult Female	USNM	G. Zhang	2012			Gazetteer	1 m
Other material	Zelus cervicalis	Stål, 1872	UCR_ENT 00029640	Reduviidae	Zelus	cervicalis	USA	Florida	Miami-Dade	Richmond	25.6175	-80.4144	1944-01-26	W. W. Wirth	Adult Female	USNM	G. Zhang	2012			Gazetteer
Other material	Zelus cervicalis	Stål, 1872	UCR_ENT 00029641	Reduviidae	Zelus	cervicalis	USA	Florida	Polk	Lakeland	28.0392	-81.95	1911-11-10	Wm. T. Davis	Adult Female	USNM	G. Zhang	2012			Gazetteer
Other material	Zelus cervicalis	Stål, 1872	UCR_ENT 00029642	Reduviidae	Zelus	cervicalis	USA	Florida	Jefferson	Monticello	30.545	-83.87	1919-02-24	W. A. Hoffman	Adult Male	USNM	G. Zhang	2012			GeoLocate Software
Other material	Zelus cervicalis	Stål, 1872	UCR_ENT 00029643	Reduviidae	Zelus	cervicalis	USA	Florida	Volusia	Edgewater	28.9688	-80.909	1939-02-20	C. A. Frost	Adult sex unknown	USNM	G. Zhang	2012			Google Earth
Other material	Zelus cervicalis	Stål, 1872	UCR_ENT 00029644	Reduviidae	Zelus	cervicalis	USA	Florida	Miami-Dade	Homestead	25.4683	-80.4778	1949-12-17	C.W. Sabrosky	Adult Female	USNM	G. Zhang	2012			GeoLocate Software
Other material	Zelus cervicalis	Stål, 1872	UCR_ENT 00029645	Reduviidae	Zelus	cervicalis	USA	Alabama	Covington	Florala	31.0052	-86.328	1940-10-23	S. S. Easter	Adult Male	USNM	G. Zhang	2012			Gazetteer
Other material	Zelus cervicalis	Stål, 1872	UCR_ENT 00029646	Reduviidae	Zelus	cervicalis	USA	Florida	Duval	Duval Co.	30.3569	-81.6315	no date provided	Unknown	Adult Male	USNM	G. Zhang	2012			Gazetteer
Other material	Zelus cervicalis	Stål, 1872	UCR_ENT 00029647	Reduviidae	Zelus	cervicalis	USA	Florida	Miami-Dade	TimmsHmk, Dade Co.	25.617	-80.5331	1919-02-24	H. S. Barber	Adult Male	USNM	G. Zhang	2012			Gazetteer
Other material	Zelus cervicalis	Stål, 1872	UCR_ENT 00029648	Reduviidae	Zelus	cervicalis	USA	Florida	Duval	Jacksonville	30.3319	-81.6558	1935-05-02	Unknown	Adult Female	USNM	G. Zhang	2012
Other material	Zelus cervicalis	Stål, 1872	UCR_ENT 00029649	Reduviidae	Zelus	cervicalis	USA	Texas	Victoria	victoria	28.8053	-97.0036	1907-09-19	J. D. Mitchell	Adult Male	USNM	G. Zhang	2012	Head missing		Google Earth
Other material	Zelus cervicalis	Stål, 1872	UCR_ENT 00029651	Reduviidae	Zelus	cervicalis	USA	Texas	Victoria	victoria	28.8053	-97.0036	1906-11-06	J. D. Mitchell	Adult Male	USNM	G. Zhang	2012			Google Earth
Other material	Zelus cervicalis	Stål, 1872	UCR_ENT 00029652	Reduviidae	Zelus	cervicalis	USA	Texas	Victoria	victoria	28.8053	-97.0036	1911-07-19	J. D. Mitchell	Adult Male	USNM	G. Zhang	2012			Google Earth
Other material	Zelus cervicalis	Stål, 1872	UCR_ENT 00029653	Reduviidae	Zelus	cervicalis	USA	Texas	Cameron	Brownsville	25.9014	-97.4972	1936-03-16	P. A. Glick	Adult Male	USNM	G. Zhang	2012	Bears labels 'Cotton' and '351'		GeoLocate Software
Other material	Zelus cervicalis	Stål, 1872	UCR_ENT 00029654	Reduviidae	Zelus	cervicalis	USA	Texas	Cameron	Brownsville	25.9014	-97.4972	1936-03-24	P. A. Glick	Adult Male	USNM	G. Zhang	2012	Bears labels 'Monarda citridora' and '351'		GeoLocate Software
Other material	Zelus cervicalis	Stål, 1872	UCR_ENT 00029655	Reduviidae	Zelus	cervicalis	USA	Texas	Cameron	Brownsville	25.9014	-97.4972	1937-08-08	D. J. & J. N.	Adult Male	USNM	G. Zhang	2012			GeoLocate Software
Other material	Zelus cervicalis	Stål, 1872	UCR_ENT 00029656	Reduviidae	Zelus	cervicalis	USA	Texas	Cameron	Brownsville	25.9014	-97.4972	1936-03-06	P. A. Glick	Adult Male	USNM	G. Zhang	2012			GeoLocate Software
Other material	Zelus cervicalis	Stål, 1872	UCR_ENT 00029657	Reduviidae	Zelus	cervicalis	USA	Texas	Cameron	Brownsville	25.9014	-97.4972	1936-03-10	P. A. Glick	Adult Male	USNM	G. Zhang	2012	Bears labels 'cotton' and '351'		GeoLocate Software
Other material	Zelus cervicalis	Stål, 1872	UCR_ENT 00029658	Reduviidae	Zelus	cervicalis	USA	Texas	Cameron	Brownsville	25.9014	-97.4972	1936-03-04	P. A. Glick	Adult Female	USNM	G. Zhang	2012	Bears label 'cotton'		GeoLocate Software
Other material	Zelus cervicalis	Stål, 1872	UCR_ENT 00029659	Reduviidae	Zelus	cervicalis	USA	Texas	Cameron	Brownsville	25.9014	-97.4972	1923-01-18	T. C. Barber	Adult Female	USNM	G. Zhang	2012			GeoLocate Software
Other material	Zelus cervicalis	Stål, 1872	UCR_ENT 00029687	Reduviidae	Zelus	cervicalis	USA	Texas	Cherokee	Jacksonville	31.9109	-95.3268	1905-10-12	W. D. Pierce	Adult Female	USNM	G. Zhang	2012			Google Earth	122 m
Other material	Zelus cervicalis	Stål, 1872	UCR_ENT 00029688	Reduviidae	Zelus	cervicalis	USA	Texas	Cherokee	Jacksonville	31.9109	-95.3268	1905-10-12	W. D. Pierce	Adult Female	USNM	G. Zhang	2012			Google Earth	122 m
Other material	Zelus cervicalis	Stål, 1872	UCR_ENT 00029689	Reduviidae	Zelus	cervicalis	USA	Texas	Calhoun	Port Lavaca	28.6147	-96.6258	1907-08-22	J. D. Mitchell	Adult Male	USNM	G. Zhang	2012
Other material	Zelus cervicalis	Stål, 1872	UCR_ENT 00029690	Reduviidae	Zelus	cervicalis	USA	Arkansas	Ouachita	Camden	33.5846	-92.8343	1906-09-18	J. D. Mitchell	Adult Female	USNM	G. Zhang	2012			Gazetteer	46 m
Other material	Zelus cervicalis	Stål, 1872	UCR_ENT 00029691	Reduviidae	Zelus	cervicalis	USA	Florida	Polk	Lakeland	28.0392	-81.95	1911-11-10	H. G. Barber	Adult sex unknown	USNM	G. Zhang	2012	abdomen missing		Gazetteer
Other material	Zelus cervicalis	Stål, 1872	UCR_ENT 00029692	Reduviidae	Zelus	cervicalis	USA	Florida	Polk	Lakeland	28.0392	-81.95	1911-11-08	Wm. T. Davis	Adult Male	USNM	G. Zhang	2012			Gazetteer
Other material	Zelus cervicalis	Stål, 1872	UCR_ENT 00029693	Reduviidae	Zelus	cervicalis	USA	Florida	Charlotte	Punta Gorda	26.9294	-82.0456	1911-11-14	Unknown	Adult Male	USNM	G. Zhang	2012			Gazetteer
Other material	Zelus cervicalis	Stål, 1872	UCR_ENT 00029694	Reduviidae	Zelus	cervicalis	USA	Florida	Brevard	La Grange	28.636	-80.83	1913-09-12	Unknown	Adult Male	USNM	G. Zhang	2012			GeoLocate Software
Other material	Zelus cervicalis	Stål, 1872	UCR_ENT 00029695	Reduviidae	Zelus	cervicalis	USA	Florida	Lee	Fort Myers	26.6403	-81.8725	1910-09-01	Unknown	Adult Female	USNM	G. Zhang	2012
Other material	Zelus cervicalis	Stål, 1872	UCR_ENT 00029696	Reduviidae	Zelus	cervicalis	USA	Florida	unknown	Florida			no date provided	Unknown	Adult Male	USNM	G. Zhang	2012
Other material	Zelus cervicalis	Stål, 1872	UCR_ENT 00029697	Reduviidae	Zelus	cervicalis	USA	Florida	unknown	Florida			no date provided	Unknown	Adult Male	USNM	G. Zhang	2012
Other material	Zelus cervicalis	Stål, 1872	UCR_ENT 00029698	Reduviidae	Zelus	cervicalis	USA	Florida	unknown	Florida			no date provided	Unknown	Adult Male	USNM	G. Zhang	2012
Other material	Zelus cervicalis	Stål, 1872	UCR_ENT 00029699	Reduviidae	Zelus	cervicalis	USA	Florida	unknown	Florida			no date provided	Unknown	Adult Male	USNM	G. Zhang	2012
Other material	Zelus cervicalis	Stål, 1872	UCR_ENT 00029700	Reduviidae	Zelus	cervicalis	USA	Florida	unknown	Florida			no date provided	Unknown	Adult Male	USNM	G. Zhang	2012
Other material	Zelus cervicalis	Stål, 1872	UCR_ENT 00029701	Reduviidae	Zelus	cervicalis	USA	Florida	unknown	Florida			no date provided	Unknown	Adult Male	USNM	G. Zhang	2012
Other material	Zelus cervicalis	Stål, 1872	UCR_ENT 00029702	Reduviidae	Zelus	cervicalis	USA	Florida	unknown	Florida			no date provided	Unknown	Adult Female	USNM	G. Zhang	2012
Other material	Zelus cervicalis	Stål, 1872	UCR_ENT 00029703	Reduviidae	Zelus	cervicalis	USA	Florida	unknown	Florida			no date provided	Unknown	Adult Female	USNM	G. Zhang	2012
Other material	Zelus cervicalis	Stål, 1872	UCR_ENT 00029704	Reduviidae	Zelus	cervicalis	USA	Florida	unknown	Florida			no date provided	Unknown	Adult Female	USNM	G. Zhang	2012
Other material	Zelus cervicalis	Stål, 1872	UCR_ENT 00029821	Reduviidae	Zelus	cervicalis	USA	Texas	San Patricio	Sinton	28.0364	-97.5089	no date provided	E. A. Schwarz	Adult Female	USNM	G. Zhang	2012
Other material	Zelus cervicalis	Stål, 1872	UCR_ENT 00029822	Reduviidae	Zelus	cervicalis	USA	Texas	Cherokee	Jacksonville	31.9109	-95.3268	1905-10-12	W. D. Pierce	Adult Female	USNM	G. Zhang	2012			Google Earth	122 m
Other material	Zelus cervicalis	Stål, 1872	UCR_ENT 00029823	Reduviidae	Zelus	cervicalis	USA	Arkansas	Hempstead	Hope	33.6669	-93.5914	no date provided	L. Knobel	Adult Female	USNM	G. Zhang	2012			Gazetteer
Other material	Zelus cervicalis	Stål, 1872	UCR_ENT 00029824	Reduviidae	Zelus	cervicalis	USA	Texas	Fort Bend	Sugar Land	29.6197	-95.6349	1938-06-11	Unknown	Adult Male	USNM	G. Zhang	2012	'C9965' on label		Gazetteer
Other material	Zelus cervicalis	Stål, 1872	UCR_ENT 00029825	Reduviidae	Zelus	cervicalis	USA	Texas	Smith	Tyler	32.3513	-95.3011	1905-03-19	AW Morrill	Adult Female	USNM	G. Zhang	2012			Gazetteer
Other material	Zelus cervicalis	Stål, 1872	UCR_ENT 00029826	Reduviidae	Zelus	cervicalis	USA	Texas	Cameron	Brownsville	25.9014	-97.4972	1917-04-16	R. A. Cushman	Adult Female	USNM	G. Zhang	2012			GeoLocate Software
Other material	Zelus cervicalis	Stål, 1872	UCR_ENT 00029827	Reduviidae	Zelus	cervicalis	USA	Arkansas	Howard	Unknown	34.1	-94.0167	1937-09-27	WmF Turner	Adult Female	USNM	G. Zhang	2012	Bears label 'From Weeds, Peach Orch', 'No. T[7?]-7338'		GeoLocate Software
Other material	Zelus cervicalis	Stål, 1872	UCR_ENT 00029828	Reduviidae	Zelus	cervicalis	USA	Louisiana	unknown	Bossier Parish	32.6333	-93.6	1937-09-28	WmF Turner	Adult Male	USNM	G. Zhang	2012			GeoLocate Software
Other material	Zelus cervicalis	Stål, 1872	UCR_ENT 00029829	Reduviidae	Zelus	cervicalis	USA	Arkansas	Hempstead	Hope	33.6669	-93.5914	1925-07-16	L. Knobel	Adult Female	USNM	G. Zhang	2012			Gazetteer
Other material	Zelus cervicalis	Stål, 1872	UCR_ENT 00029830	Reduviidae	Zelus	cervicalis	USA	Arkansas	Hempstead	Hope	33.6669	-93.5914	1925-06-23	L. Knobel	Adult Male	USNM	G. Zhang	2012			Gazetteer
Other material	Zelus cervicalis	Stål, 1872	UCR_ENT 00029833	Reduviidae	Zelus	cervicalis	USA	Missouri	Boone	Columbia	38.9517	-92.3339	1925-04-09	JC Shiver	Adult Male	USNM	G. Zhang	2012
Other material	Zelus cervicalis	Stål, 1872	UCR_ENT 00029847	Reduviidae	Zelus	cervicalis	USA	Louisiana	unknown	Bossier Parish	32.6333	-93.6	1937-09-28	WmF Turner	Adult sex unknown	USNM	G. Zhang	2012	abdomen missing		GeoLocate Software
Other material	Zelus cervicalis	Stål, 1872	UCR_ENT 00029848	Reduviidae	Zelus	cervicalis	USA	Texas	Chambers	Anahuac National Wildlife Refuge	29.5667	-94.5333	1993-09-04	W. A. Jones	Adult Male	USNM	G. Zhang	2012	Common in weedy open field	Sweep Netting	GeoLocate Software
Other material	Zelus cervicalis	Stål, 1872	UCR_ENT 00029849	Reduviidae	Zelus	cervicalis	USA	Texas	Chambers	Anahuac National Wildlife Refuge	29.5667	-94.5333	1993-09-04	W. A. Jones	Adult Male	USNM	G. Zhang	2012	Common in weedy open field	Sweep Netting	GeoLocate Software
Other material	Zelus cervicalis	Stål, 1872	UCR_ENT 00029850	Reduviidae	Zelus	cervicalis	USA	Texas	Chambers	Anahuac National Wildlife Refuge	29.5667	-94.5333	1993-09-04	W. A. Jones	Adult Male	USNM	G. Zhang	2012	Common in weedy open field	Sweep Netting	GeoLocate Software
Other material	Zelus cervicalis	Stål, 1872	UCR_ENT 00029851	Reduviidae	Zelus	cervicalis	USA	Texas	Chambers	Anahuac National Wildlife Refuge	29.5667	-94.5333	1993-09-04	W. A. Jones	Adult Male	USNM	G. Zhang	2012	Common in weedy open field	Sweep Netting	GeoLocate Software
Other material	Zelus cervicalis	Stål, 1872	UCR_ENT 00029852	Reduviidae	Zelus	cervicalis	USA	Texas	Cameron	Las Palomas Wildlife Management Area, Anacua Unit	26.0552	-97.8461	1993-09-14	W. C. Warlield	Adult Male	USNM	G. Zhang	2012	Swept from Solanum elaeagifolium along weedy roadside	Sweep Netting	Google Earth	20 m
Other material	Zelus cervicalis	Stål, 1872	UCR_ENT 00029853	Reduviidae	Zelus	cervicalis	USA	Texas	Cameron	Las Palomas Wildlife Management Area, Anacua Unit	26.0552	-97.8461	1993-09-14	W. C. Warlield	Adult Female	USNM	G. Zhang	2012	Swept from Solanum elaeagifolium along weedy roadside		Google Earth	20 m
Other material	Zelus cervicalis	Stål, 1872	UCR_ENT 00029854	Reduviidae	Zelus	cervicalis	USA	Texas	Chambers	Anahuac National Wildlife Refuge	29.5667	-94.5333	1993-09-04	W. A. Jones	Adult Female	USNM	G. Zhang	2012		Sweep Netting	GeoLocate Software
Other material	Zelus cervicalis	Stål, 1872	UCR_ENT 00029856	Reduviidae	Zelus	cervicalis	USA	Louisiana	Lincoln	Ruston	32.5231	-92.6378	1942-10-08	W. W. Wisch	Adult sex unknown	USNM	G. Zhang	2012	abdomen missing		GeoLocate Software
Other material	Zelus cervicalis	Stål, 1872	UCR_ENT 00029857	Reduviidae	Zelus	cervicalis	USA	Georgia	Marion	Buena Vista	32.3189	-84.5172	1947-05-22	J. C. Lutz	Adult Female	USNM	G. Zhang	2012			GeoLocate Software
Other material	Zelus cervicalis	Stål, 1872	UCR_ENT 00029858	Reduviidae	Zelus	cervicalis	USA	Arkansas	Hempstead	Hope	33.6669	-93.5914	1911-09-30	L. Knobel	Adult Female	USNM	G. Zhang	2012			Gazetteer
Other material	Zelus cervicalis	Stål, 1872	UCR_ENT 00029859	Reduviidae	Zelus	cervicalis	USA	Texas	Cameron	Laguna madre, 25 mi SE Harlingen	25.8271	-97.6958	1945-02-17	D. E. Hardy	Adult Male	USNM	G. Zhang	2012			Google Earth
Other material	Zelus cervicalis	Stål, 1872	UCR_ENT 00030649	Reduviidae	Zelus	cervicalis	USA	Georgia	Grady	Percy Club Farm, Beachton	30.7123	-84.1365	1924-07-15	C. O. Handley	Adult Male	USNM	G. Zhang	2012			Google Earth
Other material	Zelus cervicalis	Stål, 1872	UCR_ENT 00030650	Reduviidae	Zelus	cervicalis	USA	Georgia	Grady	Beachton	30.7272	-84.1397	1924-07-18	C. O. Handley	Adult Male	USNM	G. Zhang	2012			Gazetteer
Other material	Zelus cervicalis	Stål, 1872	UCR_ENT 00030651	Reduviidae	Zelus	cervicalis	USA	Georgia	Muscogee	Columbus	32.4683	-84.9908	1950-07-04	J. C. Lutz	Adult Male	USNM	G. Zhang	2012			Gazetteer	75 m
Other material	Zelus cervicalis	Stål, 1872	UCR_ENT 00030652	Reduviidae	Zelus	cervicalis	USA	Georgia	Muscogee	Columbus	32.4683	-84.9908	1950-07-04	J. C. Lutz	Adult Male	USNM	G. Zhang	2012			Gazetteer	75 m
Other material	Zelus cervicalis	Stål, 1872	UCR_ENT 00030653C	Reduviidae	Zelus	cervicalis	USA	Georgia	Muscogee	Columbus	32.4683	-84.9908	1950-07-04	J. C. Lutz	Adult Male	USNM	G. Zhang	2012			Gazetteer	75 m
Other material	Zelus cervicalis	Stål, 1872	UCR_ENT 00030654	Reduviidae	Zelus	cervicalis	USA	Georgia	DeKalb	Stone Mountain	33.8082	-84.1702	1946-09-21	P. W. Fattig	Adult Male	USNM	G. Zhang	2012
Other material	Zelus cervicalis	Stål, 1872	UCR_ENT 00030655	Reduviidae	Zelus	cervicalis	USA	Alabama	Montgomery	Barachias	32.3	-86.2	1916-10-16	E. G. Holt	Adult Male	USNM	G. Zhang	2012			Gazetteer
Other material	Zelus cervicalis	Stål, 1872	UCR_ENT 00030656	Reduviidae	Zelus	cervicalis	USA	Georgia	Tift	Tifton	31.4633	-83.51	1936-06-26	P. A. Glick	Adult Male	USNM	G. Zhang	2012			Unknown
Other material	Zelus cervicalis	Stål, 1872	UCR_ENT 00030657	Reduviidae	Zelus	cervicalis	USA	Alabama	Escambia	Escambia County	31.1399	-87.1381	1941-11-12	Unknown	Adult Male	USNM	G. Zhang	2012	Additional label information: T-19232
Other material	Zelus cervicalis	Stål, 1872	UCR_ENT 00030658	Reduviidae	Zelus	cervicalis	USA	Alabama	Montgomery	Montgomery	32.3667	-86.3	1946-11-05	H. Rodney Dodge	Adult Male	USNM	G. Zhang	2012		Sweep Netting	Gazetteer	76 m
Other material	Zelus cervicalis	Stål, 1872	UCR_ENT 00030659	Reduviidae	Zelus	cervicalis	USA	Alabama	Baldwin	4 miles north of Gulf Shores	30.25	-87.7	1991-10-20	McGinley & Mello	Adult Male	USNM	G. Zhang	2012	Additional label reads: Collected on Solidago paucifloscilosa		Label
Other material	Zelus cervicalis	Stål, 1872	UCR_ENT 00030660	Reduviidae	Zelus	cervicalis	USA	Alabama	Montgomery	Barachias	32.3	-86.2	1916-10-16	E. G. Holt	Adult Male	USNM	G. Zhang	2012			Gazetteer
Other material	Zelus cervicalis	Stål, 1872	UCR_ENT 00030661	Reduviidae	Zelus	cervicalis	USA	Texas	Jackson	Edna	28.9783	-96.6458	1908-07-19	J. D. Mitchell	Adult Male	USNM	G. Zhang	2012			Gazetteer	18 m
Other material	Zelus cervicalis	Stål, 1872	UCR_ENT 00030662	Reduviidae	Zelus	cervicalis	USA	Mississippi	Adams	Natchez	31.5617	-91.4075	1909-06-14	E. S. Tucker	Adult Male	USNM	G. Zhang	2012			Google Earth	43 m
Other material	Zelus cervicalis	Stål, 1872	UCR_ENT 00030663	Reduviidae	Zelus	cervicalis	USA	Mississippi	Harrison	Biloxi	30.3958	-88.8853	1917-06-14	J. Bequaert	Adult Male	USNM	G. Zhang	2012
Other material	Zelus cervicalis	Stål, 1872	UCR_ENT 00030664	Reduviidae	Zelus	cervicalis	USA	Louisiana	Lincoln	Ruston	32.5231	-92.6378	1939-11-09	H. Morrison	Adult Male	USNM	G. Zhang	2012			GeoLocate Software
Other material	Zelus cervicalis	Stål, 1872	UCR_ENT 00030665	Reduviidae	Zelus	cervicalis	USA	Louisiana	Lincoln	Ruston	32.5231	-92.6378	1936-09-01	F.L. Afeman	Adult Male	USNM	G. Zhang	2012			GeoLocate Software
Other material	Zelus cervicalis	Stål, 1872	UCR_ENT 00030675	Reduviidae	Zelus	cervicalis	USA	North Carolina	Currituck	Currituck County	36.4153	-75.9265	1935-07-27	J. C. Bridwell	Adult Male	USNM	G. Zhang	2012			GeoLocate Software
Other material	Zelus cervicalis	Stål, 1872	UCR_ENT 00030676	Reduviidae	Zelus	cervicalis	USA	North Carolina	Moore	Southern Pines	35.1739	-79.3925	1906-06-05	E. Wilson	Adult Male	USNM	G. Zhang	2012			GeoLocate Software	159 m
Other material	Zelus cervicalis	Stål, 1872	UCR_ENT 00030677	Reduviidae	Zelus	cervicalis	USA	North Carolina	Currituck	Currituck County	36.4153	-75.9265	1935-07-27	J. C. Bridwell	Adult Male	USNM	G. Zhang	2012			GeoLocate Software
Other material	Zelus cervicalis	Stål, 1872	UCR_ENT 00030678	Reduviidae	Zelus	cervicalis	USA	North Carolina	Dare	Roanoke Island	35.8921	-75.6621	1908-07-27	J. C. Bridwell	Adult Male	USNM	G. Zhang	2012			Google Earth
Other material	Zelus cervicalis	Stål, 1872	UCR_ENT 00030679	Reduviidae	Zelus	cervicalis	USA	Virginia	Virginia Beach	Cape Henry	37.049	-78.57	1932-09-12	H. G. Barber	Adult Male	USNM	G. Zhang	2012			GeoLocate Software
Other material	Zelus cervicalis	Stål, 1872	UCR_ENT 00030680	Reduviidae	Zelus	cervicalis	MEXICO	Jalisco	None or Unknown	SW La Sayula	19.8745	-103.618	1956-08-03	V. D. Roth	Adult Male	USNM	G. Zhang	2012			Google Earth
Other material	Zelus cervicalis	Stål, 1872	UCR_ENT 00030681	Reduviidae	Zelus	cervicalis	USA	Virginia	Virginia Beach	Cape Henry	37.049	-78.57	1932-09-12	H. G. Barber	Adult Female	USNM	G. Zhang	2012			GeoLocate Software
Other material	Zelus cervicalis	Stål, 1872	UCR_ENT 00030682	Reduviidae	Zelus	cervicalis	USA	Virginia	Virginia Beach	Cape Henry	37.049	-78.57	1932-09-10	H. G. Barber	Adult Female	USNM	G. Zhang	2012			GeoLocate Software
Other material	Zelus cervicalis	Stål, 1872	UCR_ENT 00030683	Reduviidae	Zelus	cervicalis	USA	Virginia	Virginia Beach	Cape Henry	37.049	-78.57	1932-09-10	H. G. Barber	Adult Female	USNM	G. Zhang	2012			GeoLocate Software
Other material	Zelus cervicalis	Stål, 1872	UCR_ENT 00030684	Reduviidae	Zelus	cervicalis	USA	Virginia	Virginia Beach	Cape Henry	37.049	-78.57	1932-09-12	H. G. Barber	Adult Female	USNM	G. Zhang	2012			GeoLocate Software
Other material	Zelus cervicalis	Stål, 1872	UCR_ENT 00030685	Reduviidae	Zelus	cervicalis	USA	Virginia	Virginia Beach	Cape Henry	37.049	-78.57	1932-09-12	H. G. Barber	Adult Female	USNM	G. Zhang	2012			GeoLocate Software
Other material	Zelus cervicalis	Stål, 1872	UCR_ENT 00030686	Reduviidae	Zelus	cervicalis	USA	Texas	Dallas	Dallas (City of)	32.7833	-96.8	1907-09-21	F. C. Bishopp	Adult Female	USNM	G. Zhang	2012			GeoLocate Software
Other material	Zelus cervicalis	Stål, 1872	UCR_ENT 00030687	Reduviidae	Zelus	cervicalis	USA	Texas	Victoria	Victoria	28.805	-97.0033	1906-11-09	J. D. Mitchell	Adult Female	USNM	G. Zhang	2012	Additional label reads: in cotton fields
Other material	Zelus cervicalis	Stål, 1872	UCR_ENT 00030688	Reduviidae	Zelus	cervicalis	USA	Texas	McLennan	Waco	31.5493	-97.1467	1906-08-28	F. C. Bishopp	Adult Female	USNM	G. Zhang	2012			Gazetteer
Other material	Zelus cervicalis	Stål, 1872	UCR_ENT 00030689	Reduviidae	Zelus	cervicalis	USA	Mississippi	Pearl River	Pearl River County	30.7759	-89.5806	1940-04-15	L. Hines	Adult Female	USNM	G. Zhang	2012			GeoLocate Software
Other material	Zelus cervicalis	Stål, 1872	UCR_ENT 00030690	Reduviidae	Zelus	cervicalis	USA	Mississippi	Lincoln	Lincoln County			1938-03-10	W. F. Turner	Adult Female	USNM	G. Zhang	2012
Other material	Zelus cervicalis	Stål, 1872	UCR_ENT 00030691	Reduviidae	Zelus	cervicalis	USA	Mississippi	Pearl River	Pearl River County	30.7759	-89.5806	1940-04-15	L. Hines	Adult Female	USNM	G. Zhang	2012			GeoLocate Software
Other material	Zelus cervicalis	Stål, 1872	UCR_ENT 00030692	Reduviidae	Zelus	cervicalis	USA	Mississippi	unknown	unknown			Sep 1896	H. E. Weed	Adult Female	USNM	G. Zhang	2012	Label reads: Ag Coll Miss
Other material	Zelus cervicalis	Stål, 1872	UCR_ENT 00030693	Reduviidae	Zelus	cervicalis	USA	North Carolina	Currituck	Currituck County	36.4153	-75.9265	1935-07-27	J. C. Bridwell	Adult Female	USNM	G. Zhang	2012			GeoLocate Software
Other material	Zelus cervicalis	Stål, 1872	UCR_ENT 00030694	Reduviidae	Zelus	cervicalis	USA	Mississippi	Pearl River	Pearl River County	30.7759	-89.5806	1940-04-15	L. Hines	Adult Female	USNM	G. Zhang	2012			GeoLocate Software
Other material	Zelus cervicalis	Stål, 1872	UCR_ENT 00030695	Reduviidae	Zelus	cervicalis	USA	Arizona	Cochise	Huachuca Mountains	31.502	-110.399	1931-07-01	H. G. Barber	Adult Female	USNM	G. Zhang	2012				1839 m
Other material	Zelus cervicalis	Stål, 1872	UCR_ENT 00030696	Reduviidae	Zelus	cervicalis	USA	Arizona	Cochise	Huachuca Mountains	31.502	-110.399	no date provided	H. G. Barber	Adult Female	USNM	G. Zhang	2012				1839 m
Other material	Zelus cervicalis	Stål, 1872	UCR_ENT 00030697	Reduviidae	Zelus	cervicalis	USA	Alabama	Montgomery	Barachias	32.3	-86.2	1916-10-16	E. G. Holt	Adult Female	USNM	G. Zhang	2012			Gazetteer
Other material	Zelus cervicalis	Stål, 1872	UCR_ENT 00030698	Reduviidae	Zelus	cervicalis	USA	Alabama	Monroe	Monroeville	31.53	-87.32	1940-07-16	S. S. Easter	Adult Female	USNM	G. Zhang	2012			Gazetteer
Other material	Zelus cervicalis	Stål, 1872	UCR_ENT 00030699	Reduviidae	Zelus	cervicalis	USA	Alabama	Mobile	Mobile	30.6932	-88.0431	1912-04-20	H. G. Barber	Adult Female	USNM	G. Zhang	2012			GeoLocate Software
Other material	Zelus cervicalis	Stål, 1872	UCR_ENT 00030700	Reduviidae	Zelus	cervicalis	USA	Alabama	Mobile	Mobile	30.6932	-88.0431	1911-05-06	H. P. Loding	Adult Female	USNM	G. Zhang	2012			GeoLocate Software
Other material	Zelus cervicalis	Stål, 1872	UCR_ENT 00030701	Reduviidae	Zelus	cervicalis	USA	North Carolina	Dare	Roanoke Island	35.8921	-75.6621	1908-07-27	J. C. Bridwell	Adult Female	USNM	G. Zhang	2012			Google Earth
Other material	Zelus cervicalis	Stål, 1872	UCR_ENT 00030702	Reduviidae	Zelus	cervicalis	USA	Georgia	Tift	Tifton	31.4633	-83.51	1936-06-26	P. A. Glick	Adult Female	USNM	G. Zhang	2012			Unknown
Other material	Zelus cervicalis	Stål, 1872	UCR_ENT 00030703	Reduviidae	Zelus	cervicalis	USA	North Carolina	Currituck	Currituck County	36.4153	-75.9265	1935-07-27	J. C. Bridwell	Adult Female	USNM	G. Zhang	2012			GeoLocate Software
Other material	Zelus cervicalis	Stål, 1872	UCR_ENT 00030704	Reduviidae	Zelus	cervicalis	USA	Georgia	Glynn	Saint Simons Island	31.16	-81.389	1931-08-25	C. A. Frost	Adult Female	USNM	G. Zhang	2012			Google Earth	4 m
Other material	Zelus cervicalis	Stål, 1872	UCR_ENT 00030705	Reduviidae	Zelus	cervicalis	USA	Georgia	Grady	Beachton	30.7272	-84.1397	1924-10-12	C. O. Handley	Adult Female	USNM	G. Zhang	2012			Gazetteer
Other material	Zelus cervicalis	Stål, 1872	UCR_ENT 00030706	Reduviidae	Zelus	cervicalis	USA	Georgia	Marion	Buena Vista	32.3189	-84.5172	1946-07-03	J. C. Lutz	Adult Female	USNM	G. Zhang	2012			GeoLocate Software
Other material	Zelus cervicalis	Stål, 1872	UCR_ENT 00030707	Reduviidae	Zelus	cervicalis	USA	Georgia	Marion	Buena Vista	32.3189	-84.5172	1946-07-03	J. C. Lutz	Adult Female	USNM	G. Zhang	2012			GeoLocate Software
Other material	Zelus cervicalis	Stål, 1872	UCR_ENT 00042050	Reduviidae	Zelus	cervicalis	USA	Florida	Lee	Fort Myers	26.6403	-81.8725	1967-04-28	P. P. Babiy	Adult Male	ZSM	G. Zhang	2012
Other material	Zelus cervicalis	Stål, 1872	UCR_ENT 00042051	Reduviidae	Zelus	cervicalis	USA	Florida	Lee	Fort Myers	26.6403	-81.8725	1967-05-02	P. P. Babiy	Adult Male	ZSM	G. Zhang	2012
Other material	Zelus cervicalis	Stål, 1872	UCR_ENT 00042052	Reduviidae	Zelus	cervicalis	USA	Florida	Lee	Fort Myers	26.6403	-81.8725	1967-05-30	P. P. Babiy	Adult Male	ZSM	G. Zhang	2012
Other material	Zelus cervicalis	Stål, 1872	UCR_ENT 00042053	Reduviidae	Zelus	cervicalis	USA	Florida	Lee	Fort Myers	26.6403	-81.8725	1967-05-29	P. P. Babiy	Adult Male	ZSM	G. Zhang	2012
Other material	Zelus cervicalis	Stål, 1872	UCR_ENT 00042054	Reduviidae	Zelus	cervicalis	USA	Florida	Lee	Fort Myers	26.6403	-81.8725	1967-04-24	P. P. Babiy	Adult Male	ZSM	G. Zhang	2012
Other material	Zelus cervicalis	Stål, 1872	UCR_ENT 00042055	Reduviidae	Zelus	cervicalis	USA	Florida	Lee	Fort Myers	26.6403	-81.8725	1967-04-28	P. P. Babiy	Adult Male	ZSM	G. Zhang	2012
Other material	Zelus cervicalis	Stål, 1872	UCR_ENT 00042056	Reduviidae	Zelus	cervicalis	USA	Florida	Lee	Fort Myers	26.6403	-81.8725	1967-04-27	P. P. Babiy	Adult Female	ZSM	G. Zhang	2012
Other material	Zelus cervicalis	Stål, 1872	UCR_ENT 00042057	Reduviidae	Zelus	cervicalis	USA	Florida	Lee	Fort Myers	26.6403	-81.8725	1967-04-17	P. P. Babiy	Adult Female	ZSM	G. Zhang	2012
Other material	Zelus cervicalis	Stål, 1872	UCR_ENT 00042058	Reduviidae	Zelus	cervicalis	USA	Florida	Lee	Fort Myers	26.6403	-81.8725	1967-04-17	P. P. Babiy	Adult Female	ZSM	G. Zhang	2012
Other material	Zelus cervicalis	Stål, 1872	UCR_ENT 00042059	Reduviidae	Zelus	cervicalis	USA	Florida	Lee	Fort Myers	26.6403	-81.8725	1967-04-17	P. P. Babiy	Adult Female	ZSM	G. Zhang	2012
Other material	Zelus cervicalis	Stål, 1872	UCR_ENT 00042060	Reduviidae	Zelus	cervicalis	USA	Florida	Lee	Fort Myers	26.6403	-81.8725	1967-05-04	P. P. Babiy	Adult Female	ZSM	G. Zhang	2012
Other material	Zelus cervicalis	Stål, 1872	UCR_ENT 00042061	Reduviidae	Zelus	cervicalis	USA	Florida	Lee	Fort Myers	26.6403	-81.8725	1967-05-29	P. P. Babiy	Adult Female	ZSM	G. Zhang	2012
Other material	Zelus cervicalis	Stål, 1872	UCR_ENT 00042062	Reduviidae	Zelus	cervicalis	USA	Florida	Lee	Fort Myers	26.6403	-81.8725	1967-04-30	P. P. Babiy	Adult Female	ZSM	G. Zhang	2012
Other material	Zelus cervicalis	Stål, 1872	UCR_ENT 00042063	Reduviidae	Zelus	cervicalis	USA	North Carolina	Mecklenburg	Beverly Woods, Charlotte	35.1286	-80.8448	1964-06-20	P. P. Babiy	Adult Female	ZSM	G. Zhang	2012			Google Earth
Other material	Zelus cervicalis	Stål, 1872	UCR_ENT 00042064	Reduviidae	Zelus	cervicalis	USA	Oklahoma	Cleveland	Norman	35.22	-97.44	2005-06-08	Dr. Reinthal	Adult Female	ZSM	G. Zhang	2012			Gazetteer
Other material	Zelus cervicalis	Stål, 1872	UCR_ENT 00042065	Reduviidae	Zelus	cervicalis	USA	Tennessee	Davidson	Madison	36.28	-89.46	1967-06-16	P. P. Babiy	Adult Female	ZSM	G. Zhang	2012			Gazetteer
Other material	Zelus cervicalis	Stål, 1872	None	Reduviidae	Zelus	cervicalis	Unknown			Unknown					Adult Female	Laval University			Holotype of Evagoras marginatus. Label: No. 248, Evagoras marginatus Prov., Zelus cervicalis Stal.
Lectotype	Zelus chamaeleon	Stål, 1872	UCR_ENT 00041001	Reduviidae	Zelus	chamaeleon	COLOMBIA	Cundinamarca		Bogota	4.6	-75.1683	Date not provided	Lindig	Adult Male	NHRS	G. Zhang	2012	Lectotype of Zelus chamaeleon Stål, 1872. New designation by Zhang, Hart & Weirauch (2016). Verbatim label info: Bogota. / Lindig / v. niger Stal / designated by E.R.Hart / Lectotype Zelus chamaeleon Stal / NHRS-GULI 000000322		Gazetteer		NHRS-GULI 000000322
Allolectotype	Zelus chamaeleon	Stål, 1872	None	Reduviidae	Zelus	chamaeleon	COLOMBIA	Cundinamarca		Bogota	4.6	-75.1683	Date not provided	Lindig	Adult Female	NHRS			Allolectotype of Zelus chamaeleon Stål, 1872. New designation by Zhang, Hart & Weirauch (2016). Labels: Bogota / Lindig / Typus / v. fasciativentris Stal.		Gazetteer
Paralectotype	Zelus chamaeleon	Stål, 1872	UCR_ENT 00041002	Reduviidae	Zelus	chamaeleon	COLOMBIA	Cundinamarca		Bogota	4.6	-75.1683	Date not provided	Lindig	Adult sex unknown	NHRS	G. Zhang	2012	Paralectotype of Zelus chamaeleon Stål, 1872. New designation by Zhang, Hart & Weirauch (2016). Verbatim label info: Lindig / Bogota. / Paralectotype Zelus chamaeleon Stal / designated by E.R.Hart / NHRS-GULI 000000323		Gazetteer		NHRS-GULI 000000323
Paralectotype	Zelus chamaeleon	Stål, 1872	UCR_ENT 00041003	Reduviidae	Zelus	chamaeleon	COLOMBIA	Cundinamarca		Bogota	4.6	-75.1683	Date not provided	Lindig	Adult sex unknown	NHRS	G. Zhang	2012	Paralectotype of Zelus chamaeleon Stål, 1872. Verbatim label info: Lindig / Bogota. / v. mainticollis[?] Stal / Paralectotype Zelus chamaeleon Stal / designated by E.R.Hart / Typus / NHRS-GULI 000000327		Gazetteer		NHRS-GULI 000000327
Paralectotype	Zelus chamaeleon	Stål, 1872	UCR_ENT 00041013	Reduviidae	Zelus	chamaeleon	COLOMBIA	Cundinamarca		Bogota	4.6	-75.1683	Date not provided	Lindig	Adult sex unknown	NHRS	G. Zhang	2012	Paralectotype of Zelus chamaeleon Stål, 1872. Verbatim label info: Bogota / Lindig / Paratypus / Lectotype Zelus chamaeleon Stal / designated by E.R.Hart / NHRS-GULI 0000003958		Gazetteer		NHRS-GULI 0000003958
Other material	Zelus chamaeleon	Stål, 1872	UCR_ENT 00009556	Reduviidae	Zelus	chamaeleon	COLOMBIA	Antioquia		La Ceja	6.03056	-75.4317	1939-12-01	H Daniel	Adult Male	USNM	G. Zhang	2012			Google Earth
Other material	Zelus chamaeleon	Stål, 1872	UCR_ENT 00009557	Reduviidae	Zelus	chamaeleon	COLOMBIA	Antioquia		La Ceja	6.03056	-75.4317	1939-12-01	H Daniel	Adult Male	USNM	G. Zhang	2012			Google Earth
Other material	Zelus chamaeleon	Stål, 1872	UCR_ENT 00023010	Reduviidae	Zelus	chamaeleon	COLOMBIA	Antioquia		San Pedro	6.46278	-75.5564	1980-11-01	M. Ballen	Adult Female	MEFLG	G. Zhang	2012	label says lot 36		Google Earth
Other material	Zelus chamaeleon	Stål, 1872	UCR_ENT 00023049	Reduviidae	Zelus	chamaeleon	COLOMBIA	Antioquia		Andes, Farallones del Cilara, Vereda La Siria	5.6581	-75.8808	2000-09-24	S. L. Jaramillo	Adult Female	MEFLG	G. Zhang	2012			Gazetteer
Other material	Zelus chamaeleon	Stål, 1872	UCR_ENT 00029318	Reduviidae	Zelus	chamaeleon	COLOMBIA	Antioquia		La Ceja	6.03056	-75.4317	1939-12-01	H Daniel	Adult Male	USNM	G. Zhang	2012	Genitalia dissected		Google Earth
Other material	Zelus chamaeleon	Stål, 1872	UCR_ENT 00029319	Reduviidae	Zelus	chamaeleon	COLOMBIA	Antioquia		La Ceja	6.03056	-75.4317	1939-12-01	H Daniel	Adult Male	USNM	G. Zhang	2012	Genitalia dissected		Google Earth
Other material	Zelus chamaeleon	Stål, 1872	UCR_ENT 00022985	Reduviidae	Zelus	chamaeleon	COLOMBIA	Cundinamarca		Anolaima	4.7633	-74.4683	1941-05-29	F. J. Otoya	Adult Male	MEFLG	G. Zhang	2012			Gazetteer
Other material	Zelus chamaeleon	Stål, 1872	UCR_ENT 00025242	Reduviidae	Zelus	chamaeleon	COLOMBIA	Cundinamarca		Tocaima	4.46111	-74.6361	1994-03-23	N. Pinzon	Adult Female	UNAB	G. Zhang	2012			Label	400 m
Other material	Zelus chamaeleon	Stål, 1872	UCR_ENT 00025243	Reduviidae	Zelus	chamaeleon	COLOMBIA	Cundinamarca		La Mesa, Laguna Pedro Palo	4.68528	-74.3972	1997-05-23	F. Villamil	Adult Female	UNAB	G. Zhang	2012			Label	1298 m
Other material	Zelus chamaeleon	Stål, 1872	UCR_ENT 00025245	Reduviidae	Zelus	chamaeleon	COLOMBIA	Cundinamarca		La Mesa, Leguna Pedro Palo	4.63472	-74.4658	1997-04-01	J. Camargo	Adult Female	UNAB	G. Zhang	2012			Label	1298 m
Other material	Zelus chamaeleon	Stål, 1872	UCR_ENT 00025331	Reduviidae	Zelus	chamaeleon	COLOMBIA	Cundinamarca		La Mesa, Laguna Pedro Palo	4.68527	-74.3972	1996-11-02	A. Romero	Adult Male	UNAB	G. Zhang	2012			Label	2031 m
Other material	Zelus chamaeleon	Stål, 1872	UCR_ENT 00029320	Reduviidae	Zelus	chamaeleon	COLOMBIA	Cundinamarca		Carretera Facatativa	4.8167	-74.3667	1941-05-29	F. J. Otoya	Adult Male	USNM	G. Zhang	2012	Genitalia dissected. One label reads: Lot No. 42-15199		Gazetteer	2774 m
Other material	Zelus chamaeleon	Stål, 1872	UCR_ENT 00029321	Reduviidae	Zelus	chamaeleon	COLOMBIA	Cundinamarca		Carretera Facatativa	4.8167	-74.3667	1941-05-29	F. J. Otoya	Adult Female	USNM	G. Zhang	2012	One label reads: Lot No. 42-15199		Gazetteer	2774 m
Other material	Zelus chamaeleon	Stål, 1872	UCR_ENT 00046010	Reduviidae	Zelus	chamaeleon	COLOMBIA	Cundinamarca		La Mesa, Laguna Pedro Palo	4.68528	-74.3972	1996-11-02	E. Benavides	Adult Male	UNAB	G. Zhang	2012			Label	1298 m
Other material	Zelus chamaeleon	Stål, 1872	UCR_ENT 00071257	Reduviidae	Zelus	chamaeleon	COLOMBIA	Cundinamarca		Rio Chocho	4.3341	-74.5392	1948-06-20	Richter	Adult Male	TAMU	G. Zhang	2012			Google Earth	1750 m
Other material	Zelus chamaeleon	Stål, 1872	UCR_ENT 00029317	Reduviidae	Zelus	chamaeleon	COLOMBIA	Quindio		Salento	4.6375	-75.5703	1939-07-12	F. J. Otoya	Adult Male	USNM	G. Zhang	2012	Genitalia dissected		Gazetteer	1895 m
Other material	Zelus chamaeleon	Stål, 1872	UCR_ENT 00036049	Reduviidae	Zelus	chamaeleon	COLOMBIA	Quindio		Carretera Pereira-Armenia	4.68871	-75.6072	1963-07-01	Restrepo and Mejia	Adult Female	ICN	G. Zhang	2012					ICN 037879
Other material	Zelus chamaeleon	Stål, 1872	UCR_ENT 00036050	Reduviidae	Zelus	chamaeleon	COLOMBIA	Quindio		Carretera Pereira-Armenia	4.68871	-75.6072	1963-07-01	Restrepo and Mejia	Adult Female	ICN	G. Zhang	2012					ICN 037795
Other material	Zelus chamaeleon	Stål, 1872	UCR_ENT 00036051	Reduviidae	Zelus	chamaeleon	COLOMBIA	Quindio		Carretera Pereira-Armenia	4.68871	-75.6072	1963-07-01	Restrepo and Mejia	Adult Female	ICN	G. Zhang	2012					ICN 037880
Other material	Zelus chamaeleon	Stål, 1872	UCR_ENT 00025244	Reduviidae	Zelus	chamaeleon	COLOMBIA	Valle del Cauca		Caicedonia	4.31667	-75.8333	1998-06-02	Y. Cano	Adult Female	UNAB	G. Zhang	2012			Label	1167 m
Other material	Zelus chamaeleon	Stål, 1872	UCR_ENT 00038445	Reduviidae	Zelus	chamaeleon	ECUADOR	Tungurahua		Pundoa [near Baños]	1.4	-78.4167	1939-07-17	Wm Clarke Macmtyre	Adult Female	UCB	G. Zhang	2012
Holotype	Zelus championi	Zhang and Hart, 2016	UCR_ENT 00048759	Reduviidae	Zelus	championi	PANAMA	Chiriqui		Bugaba	8.4833	-82.6167	No date provided	G.C. Champion	Adult Male	BMNH	G. Zhang	2013	Verbatim label info: B.C.A.Rhyn.II. Zelus inconstans Ch. / Bugaba, 800-1,500 ft. Champion. / Holotype Zelus championi Hart / [genitalia vial]		Gazetteer	457 m
Paratype	Zelus championi	Zhang and Hart, 2016	UCR_ENT 00004770	Reduviidae	Zelus	championi	ECUADOR	Napo		10 km W Cosanga	0.59094	-77.8809	2005-03-10	Unknown	Adult Male	UCR	G. Zhang	2013	Drake Collection			2114 m
Paratype	Zelus championi	Zhang and Hart, 2016	UCR_ENT 00014406	Reduviidae	Zelus	championi	Costa Rica	Cartago		Monumento Nacional Guayabo, Turrialba	9.97159	-83.6907	1903-01-04	G. Fonseca	Adult Male	INBio	G. Zhang	2013	Additional information on label: L N 217200_570300		Gazetteer	1100 m	INBIO CRI002 040338
Lectotype	Zelus conjungens	(Stål, 1860)	UCR_ENT 00041000	Reduviidae	Zelus	conjungens	BRAZIL	Rio de Janeiro		unknown			No date provided	Stal	Adult Female	NHRS	G. Zhang	2013	Lectotype of Zelus conjungens (Stål, 1860). New Designation by Zhang, Hart & Weirauch (2016). Verbatim label info: Rio Jan / Stal / Lectotype Zelus conjugens (Stal) / designated by E.R.Hart / NHRS-GULI 000000320			NHRS-GULI 000000320
Paralectotype	Zelus conjungens	(Stål, 1860)	UCR_ENT 00041000	Reduviidae	Zelus	conjungens	BRAZIL	Rio de Janeiro		unknown			No date provided	Stal	Adult Female	NHRS			Paralectotype of Zelus conjungens (Stål, 1860). New Designation by Zhang, Hart & Weirauch (2016). Verbatim label info: Rio Jan / Stal / Lectotype Zelus conjugens (Stal) / designated by E.R.Hart / NHRS-GULI 000000320
Other Material	Zelus conjungens	(Stål, 1860)		Reduviidae	Zelus	conjungens	PANAMA							Boucard	Adult Female	BMNH			Holotype of Zelus atripes Champion, 1898 (synonym of Zelus conjungens). Bears the following labels: Type / Panama (Bouchard) / Zelus atripes Ch. / B.C.A. Sp. figured
Other Material	Zelus conjungens	(Stål, 1860)	UCR_ENT 00014252	Reduviidae	Zelus	conjungens	COSTA RICA	Puntarenas		San Luis, Monteverde A.C. Arenal			1993-07-01	Z. Fuentes	Adult Male	INBIO	G. Zhang	2012				1195 m
Other Material	Zelus conjungens	(Stål, 1860)	UCR_ENT 00014371	Reduviidae	Zelus	conjungens	COSTA RICA	Guanacaste		Rincon de la Vieja Las Pailas	10.7833	-85.35	no date provided	Unknown	Adult Female	INBIO	G. Zhang	2012			Google Earth	1400 m
Other Material	Zelus conjungens	(Stål, 1860)	UCR_ENT 00014372	Reduviidae	Zelus	conjungens	COSTA RICA	Puntarenas		Finca Hermanos Flores			2005-06-04 to 2005-06-10	B.Gamboa,J.Gutierrez,M.Moraga,J.Azoreita, Y.Cardenas	Adult Female	INBIO	G. Zhang	2012
Other Material	Zelus conjungens	(Stål, 1860)	UCR_ENT 00017727	Reduviidae	Zelus	conjungens	BRAZIL	Santa Catarina		Corupa	-26.4333	-49.2333	1948-01-01	A. Maller	Adult Male	AMNH	G. Zhang	2012			Gazetteer
Other Material	Zelus conjungens	(Stål, 1860)	UCR_ENT 00017728	Reduviidae	Zelus	conjungens	ARGENTINA	Misiones		Victoria			1964-10-13	A. Kovacs	Adult Male	AMNH	G. Zhang	2012
Other Material	Zelus conjungens	(Stål, 1860)	UCR_ENT 00017729	Reduviidae	Zelus	conjungens	BRAZIL	Santa Catarina		Joinvile	-26.3	-48.8333	June	F. Schade	Adult Male	AMNH	G. Zhang	2012			Gazetteer
Other Material	Zelus conjungens	(Stål, 1860)	UCR_ENT 00017730	Reduviidae	Zelus	conjungens	BRAZIL	Sao Paulo		Serra da Bocaina, São José do Barreiro	-23.3001	-44.8606	1969-10-01 to 1969-11-01	Alvarenga and Seabra	Adult Male	AMNH	G. Zhang	2012			Google Earth	1650 m
Other Material	Zelus conjungens	(Stål, 1860)	UCR_ENT 00017731	Reduviidae	Zelus	conjungens	BRAZIL	Rio de Janeiro		Fazenda Penedo Itatiaia	-21.5667	-41.75	1942-02-15	I. Burchard	Adult Male	AMNH	G. Zhang	2012			Gazetteer
Other Material	Zelus conjungens	(Stål, 1860)	UCR_ENT 00017733	Reduviidae	Zelus	conjungens	BRAZIL	Sao Paulo		unknown				Unknown	Adult Female	AMNH	G. Zhang	2012	pin through collectors name
Other Material	Zelus conjungens	(Stål, 1860)	UCR_ENT 00017734	Reduviidae	Zelus	conjungens	ARGENTINA	Misiones		Victoria			1964-10-13	A. Kovacs	Adult Female	AMNH	G. Zhang	2012
Other Material	Zelus conjungens	(Stål, 1860)	UCR_ENT 00019106	Reduviidae	Zelus	conjungens	COLOMBIA	Boyacá		Muzo	5.5353	-74.1078	no date provided	Unknown	Adult Male	CAS	G. Zhang	2012			Gazetteer
Other Material	Zelus conjungens	(Stål, 1860)	UCR_ENT 00019107	Reduviidae	Zelus	conjungens	COLOMBIA	Boyacá		Muzo	5.5353	-74.1078	no date provided	Unknown	Adult Male	CAS	G. Zhang	2012			Gazetteer
Other Material	Zelus conjungens	(Stål, 1860)	UCR_ENT 00019108	Reduviidae	Zelus	conjungens	COLOMBIA	Boyacá		Muzo	5.5353	-74.1078	no date provided	Unknown	Adult Male	CAS	G. Zhang	2012			Gazetteer
Other Material	Zelus conjungens	(Stål, 1860)	UCR_ENT 00019109	Reduviidae	Zelus	conjungens	COLOMBIA	Boyacá		Muzo	5.5353	-74.1078	no date provided	Unknown	Adult Male	CAS	G. Zhang	2012			Gazetteer
Other Material	Zelus conjungens	(Stål, 1860)	UCR_ENT 00019110	Reduviidae	Zelus	conjungens	COLOMBIA	Boyacá		Muzo	5.5353	-74.1078	no date provided	Unknown	Adult Male	CAS	G. Zhang	2012			Gazetteer
Other Material	Zelus conjungens	(Stål, 1860)	UCR_ENT 00023041	Reduviidae	Zelus	conjungens	COLOMBIA	Choco		San Francisco de Icho	5.79893	-76.5402	1981-07-01	R. Bernal	Adult Male	MEFLG	G. Zhang	2012			Google Earth
Other Material	Zelus conjungens	(Stål, 1860)	UCR_ENT 00023668	Reduviidae	Zelus	conjungens	BRAZIL	Sao Paulo		Sao Paulo	-23.5333	-46.6167	no date provided	Unknown	Adult Male	RMNH	G. Zhang	2012			Gazetteer
Other Material	Zelus conjungens	(Stål, 1860)	UCR_ENT 00023669	Reduviidae	Zelus	conjungens	BRAZIL	Sao Paulo		Sao Paulo	-23.5333	-46.6167	no date provided	Unknown	Adult Male	RMNH	G. Zhang	2012			Gazetteer
Other Material	Zelus conjungens	(Stål, 1860)	UCR_ENT 00023670	Reduviidae	Zelus	conjungens	BRAZIL	unknown		Sud.			no date provided	Unknown	Adult Male	RMNH	G. Zhang	2012
Other Material	Zelus conjungens	(Stål, 1860)	UCR_ENT 00023671	Reduviidae	Zelus	conjungens	BRAZIL	Sao Paulo		Sao Paulo	-23.5333	-46.6167	no date provided	Unknown	Adult Male	RMNH	G. Zhang	2012			Gazetteer
Other Material	Zelus conjungens	(Stål, 1860)	UCR_ENT 00023672	Reduviidae	Zelus	conjungens	COSTA RICA	Unknown		Costa Rica			no date provided	Unknown	Adult Male	RMNH	G. Zhang	2012
Other Material	Zelus conjungens	(Stål, 1860)	UCR_ENT 00023673	Reduviidae	Zelus	conjungens	BRAZIL	unknown		Sud.			no date provided	Unknown	Adult Female	RMNH	G. Zhang	2012
Other Material	Zelus conjungens	(Stål, 1860)	UCR_ENT 00023674	Reduviidae	Zelus	conjungens	BRAZIL	unknown		Sud.			no date provided	Unknown	Adult Female	RMNH	G. Zhang	2012
Other Material	Zelus conjungens	(Stål, 1860)	UCR_ENT 00023675	Reduviidae	Zelus	conjungens	BRAZIL	Sao Paulo		Sao Paulo	-23.5333	-46.6167	no date provided	Unknown	Adult Female	RMNH	G. Zhang	2012			Gazetteer
Other Material	Zelus conjungens	(Stål, 1860)	UCR_ENT 00023676	Reduviidae	Zelus	conjungens	BRAZIL	Rio Grande do Sul		Unknown			no date provided	Unknown	Adult Female	RMNH	G. Zhang	2012
Other Material	Zelus conjungens	(Stål, 1860)	UCR_ENT 00023941	Reduviidae	Zelus	conjungens	BRAZIL	Sao Paulo		Sao Paulo			no date provided	Unknown	Adult Female	RMNH	G. Zhang	2012
Other Material	Zelus conjungens	(Stål, 1860)	UCR_ENT 00029480	Reduviidae	Zelus	conjungens	ECUADOR	unknown		Rio Pumayacu Oriente			1969-03-22	L. E. Peña	Adult Female	USNM	G. Zhang	2012
Other Material	Zelus conjungens	(Stål, 1860)	UCR_ENT 00029481	Reduviidae	Zelus	conjungens	ECUADOR	Tungurahua		Banos Chontilla	-1.4	-78.4167	1968-10-02	L. E. Peña	Adult Female	USNM	G. Zhang	2012	Drake collection		Gazetteer	4108 m
Other Material	Zelus conjungens	(Stål, 1860)	UCR_ENT 00029482	Reduviidae	Zelus	conjungens	ECUADOR	Tungurahua		Banos Chontilla	-1.4	-78.4167	1968-10-02	L. E. Peña	Adult Female	USNM	G. Zhang	2012	Drake collection		Gazetteer	4108 m
Other Material	Zelus conjungens	(Stål, 1860)	UCR_ENT 00029483	Reduviidae	Zelus	conjungens	ECUADOR	Tungurahua		Banos Chontilla	-1.4	-78.4167	1968-10-02	L. E. Peña	Adult Female	USNM	G. Zhang	2012	Drake collection		Gazetteer	4108 m
Other Material	Zelus conjungens	(Stål, 1860)	UCR_ENT 00029484	Reduviidae	Zelus	conjungens	BRAZIL	Santa Catarina		Nova Teutonia	-27.1833	-52.3833	1946-11-26	F. Plaumann	Adult Female	USNM	G. Zhang	2012	Drake collection			500 m
Other Material	Zelus conjungens	(Stål, 1860)	UCR_ENT 00029515	Reduviidae	Zelus	conjungens	BRAZIL	Santa Catarina		Nova Teutonia	-27.1833	-52.3833	1946-12-09	F. Plaumann	Adult Male	USNM	G. Zhang	2012				500 m
Other Material	Zelus conjungens	(Stål, 1860)	UCR_ENT 00029516	Reduviidae	Zelus	conjungens	BRAZIL	Santa Catarina		Nova Teutonia	-27.1833	-52.3833	1946-12-04	F. Plaumann	Adult Male	USNM	G. Zhang	2012				500 m
Other Material	Zelus conjungens	(Stål, 1860)	UCR_ENT 00029548	Reduviidae	Zelus	conjungens	ARGENTINA	Misiones		Iguazu	-25.5667	-54.5667	1982-12-01	Unknown	Adult Male	USNM	G. Zhang	2012			Gazetteer	162 m
Other Material	Zelus conjungens	(Stål, 1860)	UCR_ENT 00030286	Reduviidae	Zelus	conjungens	BRAZIL	Piaui		Nova Friburgo, Estado Do Rio			1943-08-11	Wygodzinsky	Adult Female	USNM	G. Zhang	2012				900 m
Other Material	Zelus conjungens	(Stål, 1860)	UCR_ENT 00030287	Reduviidae	Zelus	conjungens	VENEZUELA	Zulia		Perija	9.74202	-72.9754	1918-01-18	Tejera	Adult Female	USNM	G. Zhang	2012			Google Earth
Other Material	Zelus conjungens	(Stål, 1860)	UCR_ENT 00030288	Reduviidae	Zelus	conjungens	BRAZIL	Minas Gerais		Vicosa	-20.75	-42.8833	1932-10-27	E. J. Hambleton	Adult Female	USNM	G. Zhang	2012			Gazetteer	653 m
Other Material	Zelus conjungens	(Stål, 1860)	UCR_ENT 00030289	Reduviidae	Zelus	conjungens	BRAZIL	Sao Paulo		Pirapora	-23.4	-47	1950-11-05	J. Paulo & J. Ferrera	Adult Female	USNM	G. Zhang	2012			Gazetteer
Other Material	Zelus conjungens	(Stål, 1860)	UCR_ENT 00030290	Reduviidae	Zelus	conjungens	BRAZIL	Santa Catarina		Nova Teutonia	-27.1833	-52.3833	1936-06-02	F. Plaumann	Adult Female	USNM	G. Zhang	2012			Label	642 m
Other Material	Zelus conjungens	(Stål, 1860)	UCR_ENT 00030291	Reduviidae	Zelus	conjungens	BRAZIL	Santa Catarina		Nova Teutonia	-27.1833	-52.3833	1946-01-30	F. Plaumann	Adult Female	USNM	G. Zhang	2012			Label	642 m
Other Material	Zelus conjungens	(Stål, 1860)	UCR_ENT 00030292	Reduviidae	Zelus	conjungens	BRAZIL	Santa Catarina		Nova Teutonia	-27.1833	-52.3833	1946-11-30	F. Plaumann	Adult Female	USNM	G. Zhang	2012			Label	642 m
Other Material	Zelus conjungens	(Stål, 1860)	UCR_ENT 00030293	Reduviidae	Zelus	conjungens	BRAZIL	Santa Catarina		Nova Teutonia	-27.1833	-52.3833	1946-12-04	F. Plaumann	Adult Female	USNM	G. Zhang	2012			Label	642 m
Other Material	Zelus conjungens	(Stål, 1860)	UCR_ENT 00030294	Reduviidae	Zelus	conjungens	BRAZIL	Santa Catarina		Nova Teutonia	-27.1833	-52.3833	1946-12-04	F. Plaumann	Adult Female	USNM	G. Zhang	2012			Label	642 m
Other Material	Zelus conjungens	(Stål, 1860)	UCR_ENT 00030295	Reduviidae	Zelus	conjungens	BRAZIL	Santa Catarina		Nova Teutonia	-27.1833	-52.3833	1946-12-04	F. Plaumann	Adult Female	USNM	G. Zhang	2012			Label	642 m
Other Material	Zelus conjungens	(Stål, 1860)	UCR_ENT 00030296	Reduviidae	Zelus	conjungens	BRAZIL	Santa Catarina		Nova Teutonia	-27.1833	-52.3833	1947-02-07	F. Plaumann	Adult Female	USNM	G. Zhang	2012			Label	642 m
Other Material	Zelus conjungens	(Stål, 1860)	UCR_ENT 00030305	Reduviidae	Zelus	conjungens	COSTA RICA	Unknown		Costa Rica			no date provided	Unknown	Adult Male	USNM	G. Zhang	2012	Drake Collection
Other Material	Zelus conjungens	(Stål, 1860)	UCR_ENT 00030306	Reduviidae	Zelus	conjungens	COSTA RICA	San Jose		San Jose	9.9333	-84.0833	1929-01-06	M. Valerio	Adult Male	USNM	G. Zhang	2012	Drake Collection		Gazetteer
Other Material	Zelus conjungens	(Stål, 1860)	UCR_ENT 00030307	Reduviidae	Zelus	conjungens	ECUADOR	Tungurahua		Tungurahua	-1.25	-78.5	1968-10-01	L. E. Peña	Adult Female	USNM	G. Zhang	2012	Drake Collection		Gazetteer
Other Material	Zelus conjungens	(Stål, 1860)	UCR_ENT 00030819	Reduviidae	Zelus	conjungens	BRAZIL	Minas Gerais		Vicosa	-20.75	-42.8833	1938-11-01	B.T. Snipes	Adult Male	USNM	G. Zhang	2012	Drake Colln.		Gazetteer	653 m
Other Material	Zelus conjungens	(Stål, 1860)	UCR_ENT 00040497	Reduviidae	Zelus	conjungens	PANAMA	Chiriqui		5 km NW Hornito	8.68555	-82.2547	1999-08-07	J. C. Schaffner	Adult Male	TAMU	G. Zhang	2012			Label	963 m
Other Material	Zelus conjungens	(Stål, 1860)	UCR_ENT 00040498	Reduviidae	Zelus	conjungens	PANAMA	Chiriqui		5 km NW Hornito	8.68555	-82.2547	1999-08-07	J. C. Schaffner	Adult Female	TAMU	G. Zhang	2012			Label	963 m
Other Material	Zelus conjungens	(Stål, 1860)	UCR_ENT 00040499	Reduviidae	Zelus	conjungens	PANAMA	Chiriqui		5 km NW Hornito	8.68555	-82.2547	1999-08-07	J. C. Schaffner	Adult Female	TAMU	G. Zhang	2012			Label	963 m
Other Material	Zelus conjungens	(Stål, 1860)	UCR_ENT 00040500	Reduviidae	Zelus	conjungens	PANAMA	Chiriqui		5 km NW Hornito	8.68555	-82.2547	1999-08-07	J. C. Schaffner	Adult Female	TAMU	G. Zhang	2012			Label	963 m
Other Material	Zelus conjungens	(Stål, 1860)	UCR_ENT 00040501	Reduviidae	Zelus	conjungens	COLOMBIA	unknown		unknown			1945-12-26	Lechera	Adult Female	TAMU	G. Zhang	2012
Other Material	Zelus conjungens	(Stål, 1860)	UCR_ENT 00040502	Reduviidae	Zelus	conjungens	BRAZIL	Sao Paulo		Cantareira	-23.5387	-46.6288	1946-12-01	Unknown	Adult Female	TAMU	G. Zhang	2012
Other Material	Zelus conjungens	(Stål, 1860)	UCR_ENT 00042018	Reduviidae	Zelus	conjungens	BRAZIL	Santa Catarina		Unknown			1932-08-01 to 1933-01-01	A. Johnk, Thaden, and Holstein	Adult Male	ZSM	G. Zhang	2012
Other Material	Zelus conjungens	(Stål, 1860)	UCR_ENT 00042019	Reduviidae	Zelus	conjungens	BRAZIL	Espirito Santo		Unknown			no date provided	Unknown	Adult Male	ZSM	G. Zhang	2012
Other Material	Zelus conjungens	(Stål, 1860)	UCR_ENT 00042020	Reduviidae	Zelus	conjungens	UNKNOWN	unknown		Unknown			no date provided	Unknown	Adult Male	ZSM	G. Zhang	2012
Other Material	Zelus conjungens	(Stål, 1860)	UCR_ENT 00042021	Reduviidae	Zelus	conjungens	BRAZIL	unknown		unknown			no date provided	Unknown	Adult Female	ZSM	G. Zhang	2012
Other Material	Zelus conjungens	(Stål, 1860)	UCR_ENT 00042022	Reduviidae	Zelus	conjungens	UNKNOWN	unknown		Unknown			no date provided	Unknown	Adult Male	ZSM	G. Zhang	2012	Primary label reads South America?
Other Material	Zelus conjungens	(Stål, 1860)	UCR_ENT 00042023	Reduviidae	Zelus	conjungens	UNKNOWN	unknown		Unknown			no date provided	Unknown	Adult Male	ZSM	G. Zhang	2012	Primary label reads South America?
Other Material	Zelus conjungens	(Stål, 1860)	UCR_ENT 00042024	Reduviidae	Zelus	conjungens	UNKNOWN	unknown		Unknown			no date provided	Unknown	Adult Male	ZSM	G. Zhang	2012	Primary label reads South America?
Other Material	Zelus conjungens	(Stål, 1860)	UCR_ENT 00042025	Reduviidae	Zelus	conjungens	UNKNOWN	unknown		Unknown			no date provided	Unknown	Adult Male	ZSM	G. Zhang	2012	Primary label reads South America?
Other Material	Zelus conjungens	(Stål, 1860)	UCR_ENT 00042026	Reduviidae	Zelus	conjungens	BRAZIL	Espirito Santo		Unknown			no date provided	Unknown	Adult Male	ZSM	G. Zhang	2012
Other Material	Zelus conjungens	(Stål, 1860)	UCR_ENT 00042027	Reduviidae	Zelus	conjungens	UNKNOWN	unknown		Unknown			no date provided	Unknown	Adult Female	ZSM	G. Zhang	2012	Primary label reads South America?
Other Material	Zelus conjungens	(Stål, 1860)	UCR_ENT 00042028	Reduviidae	Zelus	conjungens	BRAZIL	unknown		unknown			no date provided	Unknown	Adult Female	ZSM	G. Zhang	2012
Other Material	Zelus conjungens	(Stål, 1860)	UCR_ENT 00042029	Reduviidae	Zelus	conjungens	UNKNOWN	unknown		Unknown			no date provided	Unknown	Adult Female	ZSM	G. Zhang	2012	Additional label reads Hohen P.
Other Material	Zelus conjungens	(Stål, 1860)	UCR_ENT 00042030	Reduviidae	Zelus	conjungens	UNKNOWN	unknown		Unknown			no date provided	Unknown	Adult Female	ZSM	G. Zhang	2012
Other Material	Zelus conjungens	(Stål, 1860)	UCR_ENT 00042031	Reduviidae	Zelus	conjungens	BRAZIL	unknown		unknown			no date provided	Unknown	Adult Female	ZSM	G. Zhang	2012
Other Material	Zelus conjungens	(Stål, 1860)	UCR_ENT 00042032	Reduviidae	Zelus	conjungens	BRAZIL	unknown		unknown			no date provided	Unknown	Adult Female	ZSM	G. Zhang	2012
Other Material	Zelus conjungens	(Stål, 1860)	UCR_ENT 00047100	Reduviidae	Zelus	conjungens	COLOMBIA	Meta		Cano Grande, Selva en los Llanos	3.11171	-73.8369	1943-10-19	Richter	Adult Male	AMNH	G. Zhang	2012	Drake Collection		Gazetteer
Other Material	Zelus conjungens	(Stål, 1860)	UCR_ENT 00047436	Reduviidae	Zelus	conjungens	PANAMA	Canal Zone		Rodman Ammunition Dump	8.95	-79.5833	1975-09-04	J.T. Whitlaw Jr.	Adult Female	AMNH	G. Zhang	2012			Gazetteer
Other Material	Zelus conjungens	(Stål, 1860)	UCR_ENT 00047609	Reduviidae	Zelus	conjungens	BRAZIL	Santa Catarina		Nova Teutonia	-27.1833	-52.3833	1946-12-04	F. Plaumann	Adult Male	AMNH	G. Zhang	2012			Label	642 m
Other Material	Zelus conjungens	(Stål, 1860)	UCR_ENT 00047610	Reduviidae	Zelus	conjungens	PANAMA	Canal Zone		Rodman	8.96666	-79.6167	1973-08-13	Johnson	Adult Female	AMNH	G. Zhang	2012			Label
Other Material	Zelus conjungens	(Stål, 1860)	UCR_ENT 00047611	Reduviidae	Zelus	conjungens	BRAZIL	Sao Paulo		Barueri	-23.5167	-46.8833	1950-12-10	Unknown	Adult Female	AMNH	G. Zhang	2012			Gazetteer
Other Material	Zelus conjungens	(Stål, 1860)	UCR_ENT 00047612	Reduviidae	Zelus	conjungens	PANAMA	Canal Zone		Fort Kobbe	8.9167	-79.5833	1973-08-04	Unknown	Adult Female	AMNH	G. Zhang	2012			Gazetteer	14 m
Other Material	Zelus conjungens	(Stål, 1860)	UCR_ENT 00047613	Reduviidae	Zelus	conjungens	BRAZIL	unknown		Brazil			no date provided	E. I. M. S.	Adult Female	AMNH	G. Zhang	2012
Other Material	Zelus conjungens	(Stål, 1860)	UCR_ENT 00047614	Reduviidae	Zelus	conjungens	PANAMA	Canal Zone		3 mi W Cocoli	8.95707	-79.6034	1971-09-11	H. P. Stockwell	Adult Male	AMNH	G. Zhang	2012			Google Earth
Other Material	Zelus conjungens	(Stål, 1860)	UCR_ENT 00047657	Reduviidae	Zelus	conjungens	BRAZIL	Santa Catarina		Nova Teutonia	-27.1833	-52.3833	1946-11-30	F. Plaumann	Adult Male	AMNH	G. Zhang	2012	Drake Collection		Label	642 m
Other material	Zelus conjungens	(Stål, 1860)	UCR_ENT 00047658	Reduviidae	Zelus	conjungens	BRAZIL	Sao Paulo		Cantareira	-23.5387	-46.6288	1949-01-01	Unknown	Adult Male	AMNH	G. Zhang	2012
Other material	Zelus conjungens	(Stål, 1860)	UCR_ENT 00047111	Reduviidae	Zelus	conjungens	BRAZIL	Sao Paulo		Sao Paulo	-23.5333	-46.6167	no date provided	Unknown	Adult Female	AMNH	G. Zhang	2012			Gazetteer
Holotype	Zelus cordazulus	Zhang and Hart, 2016	UCR_ENT 00046973	Reduviidae	Zelus	cordazulus	PERU	Huanuco		Divisoria, Cordillera Azul	-9.215	-75.846	1947-05-01	Wygodzinsky	Adult Male	AMNH	G. Zhang	2013			Google Earth	1300 m
Paratype	Zelus cordazulus	Zhang and Hart, 2016	UCR_ENT 00029354	Reduviidae	Zelus	cordazulus	PERU	Cusco		S. Amer, Santa Isabel, Valley of River Ccosnipata	-13	-71.3	1952-01-02	F. Woytkowski	Adult Female	USNM	G. Zhang	2013			Gazetteer
Paratype	Zelus cordazulus	Zhang and Hart, 2016	UCR_ENT 00009529	Reduviidae	Zelus	cordazulus	PERU	Huanuco		Divisoria, Cordillera Azul	-9.215	-75.846	1947-05-01	Ranile	Adult Male	USNM	G. Zhang	2013			Google Earth	1300 m
Paratype	Zelus cordazulus	Zhang and Hart, 2016	UCR_ENT 00026168	Reduviidae	Zelus	cordazulus	PERU	Huanuco		Divisoria, Cordillera Azul	-9.215	-75.846	1947-05-01	Ranile	Adult Female	USNM	G. Zhang	2013			Google Earth	1300 m
Paratype	Zelus cordazulus	Zhang and Hart, 2016	UCR_ENT 00071256	Reduviidae	Zelus	cordazulus	PERU	Huanuco		Divisoria (Cordillera Azul)	-9.219	-75.829	1905-04-25	Weyrauch	Adult Female	TAMU	G. Zhang	2013			Google Earth	1500 m
Paratype	Zelus cordazulus	Zhang and Hart, 2016	UCR_ENT 00023701	Reduviidae	Zelus	cordazulus	PERU	Junin		Chanchamayo	-11.125	-75.357	no date provided	Unknown	Adult Male	RMNH	G. Zhang	2013			Google Earth
Paratype	Zelus cordazulus	Zhang and Hart, 2016	UCR_ENT 00029355	Reduviidae	Zelus	cordazulus	PERU	San Martin		15 kms SE of Moyobamba	-6.09796	-76.8605	1947-08-10	F. Woytkowski	Adult Female	USNM	G. Zhang	2013			Google Earth	890 m
Holotype	Zelus couturieri	(Berenger, 2003)		Reduviidae	Zelus	couturieri	Peru	Loreto		Iquitos			1992-07-20	Couturier, G	Adult Female	MNHN			Host plant: Psidium guajava
Paratype	Zelus couturieri	(Berenger, 2003)		Reduviidae	Zelus	couturieri	Peru	Loreto		Iquitos			1992-07-20	Couturier, G	Adult Female	Museo de Entomologia, Universidad Agraria La Molina, Lima			Host plant: Psidium guajava
Paratype	Zelus couturieri	(Berenger, 2003)		Reduviidae	Zelus	couturieri	Peru	Loreto		Iquitos			1992-07-20	Couturier, G	Adult Female	USNM			Host plant: Psidium guajava
Paratype	Zelus couturieri	(Berenger, 2003)		Reduviidae	Zelus	couturieri	Peru	Loreto		Iquitos			1992-07-20	Couturier, G	Adult Female	Jean-Michel Berenger Collection			Host plant: Psidium guajava
Lectotype	Zelus errans	Fabricius, 1803		Reduviidae	Zelus	errans	UNKNOWN	unknown		Habitat in America meridionali			No date provided	Dom. Smidt	Adult Male	ZMUC			Lectotype of Zelus errans Fabricius, 1803 (New designation by Zhang et al., 2016). Labels: Z. errans in Am. mer. Schmidt / Type
Paralectotype	Zelus errans	Fabricius, 1803		Reduviidae	Zelus	errans	UNKNOWN	unknown		Habitat in America meridionali			No date provided	Dom. Smidt	Adult Male	ZMUC			Paralectotype of Zelus errans Fabricius, 1803 (New designation by Zhang et al., 2016). Labels: Z. errans in Am. mer. Schmidt / Type
Paralectotype	Zelus errans	Fabricius, 1803		Reduviidae	Zelus	errans										ZMUC			Paralectotype of Zelus errans Fabricius, 1803 (New designation by Zhang et al., 2016). Label: errans
Other material	Zelus errans	Fabricius, 1803	UCR_ENT 00071258	Reduviidae	Zelus	errans	BOLIVIA	Cochabamba		Chapare	-16.711	-65.663	no date provided	Zischka	Adult Female	TAMU			Pinned with egg mass on leaf		Google Earth
Other material	Zelus errans	Fabricius, 1803	UCR_ENT 00017742	Reduviidae	Zelus	errans	BOLIVIA	El Beni		Versalles	-12.7333	-63.3	1964-07-19	J. K. Bouseman, J. Lussenhop	Adult Female	AMNH					GeoLocate Software
Other material	Zelus errans	Fabricius, 1803	UCR_ENT 00046747	Reduviidae	Zelus	errans	BOLIVIA	Santa Cruz	Tohito	Buena Vista	-17.45	-63.6667	1905-05-09	F. Steinbach	Adult Female	AMNH					Gazetteer	400 m
Other material	Zelus errans	Fabricius, 1803	UCR_ENT 00047055	Reduviidae	Zelus	errans	BRAZIL	Goias		Jatai	-17.8757	-51.7216	1972-11-01	F. Oliveira	Adult Male	AMNH					GeoLocate Software
Other material	Zelus errans	Fabricius, 1803	UCR_ENT 00071192	Reduviidae	Zelus	errans	BRAZIL	Goias		Campinas	-16.6679	-49.2915	1935-12-01	Borgmeier and S. Lopes	Adult Male	TAMU	G-Y Zhang	2012			Google Earth
Other material	Zelus errans	Fabricius, 1803	UCR_ENT 00029707	Reduviidae	Zelus	errans	BRAZIL	Mato Grosso		Maracaju	-21.6189	-55.1673	1937-02-01	R. C. Shannon	Adult Female	USNM
Other material	Zelus errans	Fabricius, 1803	UCR_ENT 00047040	Reduviidae	Zelus	errans	BRAZIL	Mato Grosso		Sinop	-11.8645	-55.5044	1976-10-01	M. Alvarenga	Adult Male	AMNH
Other material	Zelus errans	Fabricius, 1803	UCR_ENT 00017743	Reduviidae	Zelus	errans	BRAZIL	Parana		Caviuna	-23.2	-51.3667	1947-08-01	A. Maller	Adult Female	AMNH					GeoLocate Software
Other material	Zelus errans	Fabricius, 1803	UCR_ENT 00029706	Reduviidae	Zelus	errans	BRAZIL	Rio de Janeiro		Estrada Rio-Sao Paulo, Km 47	-22.8669	-43.7789	1944-01-03	Wygodzinsky	Adult Female	USNM					Gazetteer
Other material	Zelus errans	Fabricius, 1803	UCR_ENT 00022500	Reduviidae	Zelus	errans	COLOMBIA	Cundinamarca		Medina, Vereda Choapal	4.55	-73.3667	1986-08-03	S. Avena	Adult Male	ICN	G-Y Zhang	2012			Gazetteer	500 m	ICN 029991
Other material	Zelus errans	Fabricius, 1803	UCR_ENT 00004173	Reduviidae	Zelus	errans	FRENCH GUIANA	Cayenne	Roura	Kaw Mountains, Amazon Nature Lodge	4.55972	-52.2072	2010-09-11	C. Weirauch, L. Berniker, G. Zhang	Adult Male	UCR			Primary DNA voucher RCW 2095	Sweep Netting		307 m
Other material	Zelus errans	Fabricius, 1803	UCR_ENT 00009558	Reduviidae	Zelus	errans	PARAGUAY	Amambay		Parque Nacional Cerro Cora	-22.6675	-56.1816	1981-02-24	Unknown	Adult Male	USNM	G-Y Zhang	2012	Drake Collection		Google Earth
Other material	Zelus errans	Fabricius, 1803	UCR_ENT 00071193	Reduviidae	Zelus	errans	PERU	Huanuco		Tingo Maria (Town of)	-9.3	-75.9833	1944-09-15	E. J. Hambleton	Adult Female	TAMU	G-Y Zhang	2012			GeoLocate Software	671 m
Other material	Zelus errans	Fabricius, 1803	UCR_ENT 00038444	Reduviidae	Zelus	errans	TRINIDAD AND TOBAGO	Trinidad		Majuba Road, Petit Valley, Dileg, Martin	10.7024	-61.5457	1959-04-25	T.H.E. Aitken	Adult Male	UCB					Google Earth
Other material	Zelus errans	Fabricius, 1803		Reduviidae	Zelus	errans	UNKNOWN	unknown		Habitat in America meridionali			No date provided	Dom. Smidt		ZMUC			Lectotype of Zelus cursitans Fabricius, 1803 (New designation by Zhang et al., 2016). Labels: Z. cursitans in Am. mer. Schmidt / Type
Other material	Zelus errans	Fabricius, 1803		Reduviidae	Zelus	errans	UNKNOWN	unknown		Habitat in America meridionali			No date provided	Dom. Smidt		ZMUC			Paralectotype of Zelus cursitans Fabricius, 1803 (New designation by Zhang et al., 2016). No labels.
Other material	Zelus errans	Fabricius, 1803	UCR_ENT 00029705	Reduviidae	Zelus	errans	UNKNOWN	unknown		Unknown			no date provided	Unknown	Adult sex unknown	USNM			abdomen missing
Other material	Zelus errans	Fabricius, 1803	UCR_ENT 00010830	Reduviidae	Zelus	errans	VENEZUELA	Delta Amacuro		140 km NE of Barrancas, Cano Mariusa, Orinoco Delta	9	-61.5	1958-08-04	A. S. Menke	Adult Female	LACM	E. R. Hart	1972
Lectotype	Zelus erythrocephalus	Fabricius, 1803	UCR_ENT 00075109	Reduviidae	Zelus	erythrocephalus	UNKNOWN	unknown		Habitat in America meridionali			No date provided	Dom. Smidt	Adult Male	ZMUC	G. Zhang	2012	Lectotype of Zelus erythrocephalus Fabricius, 1803, New Designation by Zhang et al. 2016. Bears labels: Type/Z. erythrocephalus in Am. mer. Schmidt
Other material	Zelus erythrocephalus	Fabricius, 1803	UCR_ENT 00071260	Reduviidae	Zelus	erythrocephalus	BRAZIL	Goias		Campinas	-16.6679	-49.2915	1936-01-01	Borgmeier and S. Lopes	Adult Female	TAMU	G. Zhang	2012			Google Earth
Other material	Zelus erythrocephalus	Fabricius, 1803	UCR_ENT 00017796	Reduviidae	Zelus	erythrocephalus	BRAZIL	Para		Jacareacanga	-6.2667	-57.65	1969-03-01	F.R. Barbosa	Adult Female	AMNH	G. Zhang	2012			Gazetteer	88 m
Other material	Zelus erythrocephalus	Fabricius, 1803	UCR_ENT 00042956	Reduviidae	Zelus	erythrocephalus	BRAZIL	Rondonia		Ahrenhoiz Trail, off B65, 3 km N linea C20	-10.2942	-62.8723	1991-03-21	B.C. Kondratieff & J.L. Welch	Adult Female	CSUC	G. Zhang	2012			Google Earth
Other material	Zelus erythrocephalus	Fabricius, 1803	UCR_ENT 00071259	Reduviidae	Zelus	erythrocephalus	BRAZIL	Rondonia		Guapore	-12.2219	-60.5455	2015-01-07	Tarko	Adult Female	TAMU	G. Zhang	2012			Label
Other material	Zelus erythrocephalus	Fabricius, 1803	UCR_ENT 00029307	Reduviidae	Zelus	erythrocephalus	COLOMBIA	Meta		Cano Grande	3.11171	-73.8369	1948-01-20	Richter	Adult Male	USNM	G. Zhang	2012	Genitalia dissected.		Gazetteer
Other material	Zelus erythrocephalus	Fabricius, 1803	UCR_ENT 00017795	Reduviidae	Zelus	erythrocephalus	COLOMBIA	Putumayo		La Tagua, Rio Caqueta	-0.05004	-74.6666	1956-05-02	H. Sturm	Adult Female	AMNH	G. Zhang	2012			Google Earth
Other material	Zelus erythrocephalus	Fabricius, 1803	UCR_ENT 00017799	Reduviidae	Zelus	erythrocephalus	COLOMBIA	Putumayo		La Tagua, Rio Caqueta	-0.05004	-74.6666	1956-05-10	H. Sturm	Adult Female	AMNH	G. Zhang	2012			Google Earth
Other material	Zelus erythrocephalus	Fabricius, 1803	UCR_ENT 00017798	Reduviidae	Zelus	erythrocephalus	ECUADOR	Azuay		Libertad	-2.92864	-79.6882	1963-05-12	Unknown	Adult Female	AMNH	G. Zhang	2012			Google Earth
Other material	Zelus erythrocephalus	Fabricius, 1803	UCR_ENT 00029295	Reduviidae	Zelus	erythrocephalus	GUYANA	Cuyuni-Mazaruni Region		Bartica , or 'Kartabo-Bartica'	6.4	-58.6166	no date provided	Unknown	Adult Male	USNM	G. Zhang	2012	Genitalia dissected. Label says 'Trop. Research Station New York Zool. Society No. 20934'		GeoLocate Software	1 m
Other material	Zelus erythrocephalus	Fabricius, 1803	UCR_ENT 00029296	Reduviidae	Zelus	erythrocephalus	GUYANA	Cuyuni-Mazaruni Region		Bartica , or 'Kartabo-Bartica'	6.4	-58.6166	1920-11-05	Unknown	Adult Female	USNM	G. Zhang	2012	Label says ''Trop. Research Station, New York Zool. Society No. 20980'		GeoLocate Software	1 m
Other material	Zelus erythrocephalus	Fabricius, 1803	UCR_ENT 00029297	Reduviidae	Zelus	erythrocephalus	GUYANA	Cuyuni-Mazaruni Region		Bartica , or 'Kartabo-Bartica'	6.4	-58.6166	1920-11-05	Unknown	Adult Female	USNM	G. Zhang	2012	Label says ''Trop. Research Station, New York Zool. Society No. 20980'		GeoLocate Software	1 m
Other material	Zelus erythrocephalus	Fabricius, 1803	UCR_ENT 00029298	Reduviidae	Zelus	erythrocephalus	GUYANA	Cuyuni-Mazaruni Region		Bartica , or 'Kartabo-Bartica'	6.4	-58.6166	1924-05-06	Unknown	Adult Female	USNM	G. Zhang	2012	Drake Collection		GeoLocate Software	1 m
Other material	Zelus erythrocephalus	Fabricius, 1803	UCR_ENT 00029299	Reduviidae	Zelus	erythrocephalus	GUYANA	Cuyuni-Mazaruni Region		Bartica , or 'Kartabo-Bartica'	6.4	-58.6166	1924-03-02	Unknown	Adult Female	USNM	G. Zhang	2012			GeoLocate Software	1 m
Other material	Zelus erythrocephalus	Fabricius, 1803	UCR_ENT 00019135	Reduviidae	Zelus	erythrocephalus	GUYANA	Demerara-Mahaica		Demerara	6.8	-58.1667	1901-05-04	R. J. Crew	Adult Female	CAS	G. Zhang	2012			Gazetteer
Other material	Zelus erythrocephalus	Fabricius, 1803	UCR_ENT 00019136	Reduviidae	Zelus	erythrocephalus	GUYANA	Demerara-Mahaica		Demerara	6.8	-58.1667	1901-05-15	R. J. Crew	Adult Female	CAS	G. Zhang	2012			Gazetteer
Other material	Zelus erythrocephalus	Fabricius, 1803	UCR_ENT 00019137	Reduviidae	Zelus	erythrocephalus	GUYANA	Demerara-Mahaica		Demerara	6.8	-58.1667	1901-07-12	R. J. Crew	Adult Female	CAS	G. Zhang	2012			Gazetteer
Other material	Zelus erythrocephalus	Fabricius, 1803	UCR_ENT 00070007	Reduviidae	Zelus	erythrocephalus	GUYANA	Upper Demerara-Berbice Region		Mallali	5.62	-58.35	no date provided	H. S. Parish	Adult Male	KU	G. Zhang	2012			Gazetteer
Other material	Zelus erythrocephalus	Fabricius, 1803	UCR_ENT 00019134	Reduviidae	Zelus	erythrocephalus	PERU	Huanuco		Monzon valley, Tingo Maria	-9.27816	-76.0556	1954-11-02	E. I. Schlinger & E. S. Ross	Adult Female	CAS	G. Zhang	2012			Google Earth
Other material	Zelus erythrocephalus	Fabricius, 1803	UCR_ENT 00047996	Reduviidae	Zelus	erythrocephalus	PERU	Huanuco		Monzon valley, Tingo Maria	-9.27816	-76.0556	1954-11-03	E. I. Schlinger & E. S. Ross	Adult Female	CAS	G. Zhang	2012			Google Earth
Other material	Zelus erythrocephalus	Fabricius, 1803	UCR_ENT 00047997	Reduviidae	Zelus	erythrocephalus	PERU	Huanuco		Monzon valley, Tingo Maria	-9.27816	-76.0556	1954-11-16	E. I. Schlinger & E. S. Ross	Adult Female	CAS	G. Zhang	2012			Google Earth
Other material	Zelus erythrocephalus	Fabricius, 1803	UCR_ENT 00009318	Reduviidae	Zelus	erythrocephalus	SURINAME	Sipaliwini		Foengoe Island on foliage edge of airstrip	4.72392	-56.2066	1972-02-12	Unknown	Adult Male	USNM	G. Zhang	2012			Google Earth
Other material	Zelus erythrocephalus	Fabricius, 1803	UCR_ENT 00023651	Reduviidae	Zelus	erythrocephalus	SURINAME	Sipaliwini		Sipaliwini	2.1	-56.0333	1963-06-07	P.H. van Doesburg, Jr	Adult Male	RMNH	G. Zhang	2012			Publication
Other material	Zelus erythrocephalus	Fabricius, 1803	UCR_ENT 00023642	Reduviidae	Zelus	erythrocephalus	SURINAME	Unknown		Small village by Corpina Creek	5.5	-55.2167	1959-08-29	P.H. van Doesburg, Jr	Adult Male	RMNH	G. Zhang	2012	Culture.		Label
Other material	Zelus erythrocephalus	Fabricius, 1803	UCR_ENT 00023643	Reduviidae	Zelus	erythrocephalus	SURINAME	Unknown		Small village by Corpina Creek	5.5	-55.2167	1959-08-29	P.H. van Doesburg, Jr	Adult Male	RMNH	G. Zhang	2012	Culture.		Label
Other material	Zelus erythrocephalus	Fabricius, 1803	UCR_ENT 00023644	Reduviidae	Zelus	erythrocephalus	SURINAME	Unknown		Small village by Corpina Creek	5.5	-55.2167	1959-08-29	P.H. van Doesburg, Jr	Adult Male	RMNH	G. Zhang	2012	Culture.		Label
Other material	Zelus erythrocephalus	Fabricius, 1803	UCR_ENT 00023645	Reduviidae	Zelus	erythrocephalus	SURINAME	Unknown		Small village by Corpina Creek	5.5	-55.2167	1959-08-29	P.H. van Doesburg, Jr	Adult Male	RMNH	G. Zhang	2012	Culture.		Label
Other material	Zelus erythrocephalus	Fabricius, 1803	UCR_ENT 00023646	Reduviidae	Zelus	erythrocephalus	SURINAME	Unknown		Small village by Corpina Creek	5.5	-55.2167	1959-08-29	P.H. van Doesburg, Jr	Adult Male	RMNH	G. Zhang	2012	Culture.		Label
Other material	Zelus erythrocephalus	Fabricius, 1803	UCR_ENT 00023647	Reduviidae	Zelus	erythrocephalus	SURINAME	Unknown		Small village by Corpina Creek	5.5	-55.2167	1959-08-29	P.H. van Doesburg, Jr	Adult Male	RMNH	G. Zhang	2012	Culture.		Label
Other material	Zelus erythrocephalus	Fabricius, 1803	UCR_ENT 00023648	Reduviidae	Zelus	erythrocephalus	SURINAME	Unknown		Small village by Corpina Creek	5.5	-55.2167	1959-08-29	P.H. van Doesburg, Jr	Adult Male	RMNH	G. Zhang	2012	Culture.		Label
Other material	Zelus erythrocephalus	Fabricius, 1803	UCR_ENT 00023649	Reduviidae	Zelus	erythrocephalus	SURINAME	Unknown		Small village by Corpina Creek	5.5	-55.2167	1959-08-29	P.H. van Doesburg, Jr	Adult Male	RMNH	G. Zhang	2012	Culture.		Label
Other material	Zelus erythrocephalus	Fabricius, 1803	UCR_ENT 00023650	Reduviidae	Zelus	erythrocephalus	SURINAME	Unknown		Small village by Corpina Creek	5.5	-55.2167	1959-08-29	P.H. van Doesburg, Jr	Adult Male	RMNH	G. Zhang	2012	Culture.		Label
Other material	Zelus erythrocephalus	Fabricius, 1803	UCR_ENT 00023652	Reduviidae	Zelus	erythrocephalus	SURINAME	Unknown		Suriname			1962-04-01	P.H. van Doesburg, Jr	Adult Male	RMNH	G. Zhang	2012
Other material	Zelus erythrocephalus	Fabricius, 1803	UCR_ENT 00023653	Reduviidae	Zelus	erythrocephalus	SURINAME	Unknown		Small village by Corpina Creek	5.5	-55.2167	1959-08-29	P.H. van Doesburg, Jr	Adult Female	RMNH	G. Zhang	2012	Culture.		Label
Other material	Zelus erythrocephalus	Fabricius, 1803	UCR_ENT 00023654	Reduviidae	Zelus	erythrocephalus	SURINAME	Unknown		Small village by Corpina Creek	5.5	-55.2167	1959-08-29	P.H. van Doesburg, Jr	Adult Female	RMNH	G. Zhang	2012	Culture.		Label
Other material	Zelus erythrocephalus	Fabricius, 1803	UCR_ENT 00023655	Reduviidae	Zelus	erythrocephalus	SURINAME	Unknown		Small village by Corpina Creek	5.5	-55.2167	1959-08-29	P.H. van Doesburg, Jr	Adult Female	RMNH	G. Zhang	2012	Culture.		Label
Other material	Zelus erythrocephalus	Fabricius, 1803	UCR_ENT 00023656	Reduviidae	Zelus	erythrocephalus	SURINAME	Unknown		Small village by Corpina Creek	5.5	-55.2167	1959-08-29	P.H. van Doesburg, Jr	Adult Female	RMNH	G. Zhang	2012	Culture.		Label
Other material	Zelus erythrocephalus	Fabricius, 1803	UCR_ENT 00023657	Reduviidae	Zelus	erythrocephalus	SURINAME	Unknown		Small village by Corpina Creek	5.5	-55.2167	1959-08-29	P.H. van Doesburg, Jr	Adult Female	RMNH	G. Zhang	2012	Culture.		Label
Other material	Zelus erythrocephalus	Fabricius, 1803	UCR_ENT 00023658	Reduviidae	Zelus	erythrocephalus	SURINAME	Unknown		Small village by Corpina Creek	5.5	-55.2167	1959-08-29	P.H. van Doesburg, Jr	Adult Female	RMNH	G. Zhang	2012	Culture.		Label
Other material	Zelus erythrocephalus	Fabricius, 1803	UCR_ENT 00023659	Reduviidae	Zelus	erythrocephalus	SURINAME	Unknown		Small village by Corpina Creek	5.5	-55.2167	1959-08-29	P.H. van Doesburg, Jr	Adult Female	RMNH	G. Zhang	2012	Culture.		Label
Other material	Zelus erythrocephalus	Fabricius, 1803	UCR_ENT 00023660	Reduviidae	Zelus	erythrocephalus	SURINAME	Unknown		Small village by Corpina Creek	5.5	-55.2167	1959-08-29	P.H. van Doesburg, Jr	Adult Female	RMNH	G. Zhang	2012	Culture.		Label
Other material	Zelus erythrocephalus	Fabricius, 1803	UCR_ENT 00023661	Reduviidae	Zelus	erythrocephalus	SURINAME	Unknown		Small village by Corpina Creek	5.5	-55.2167	1959-08-29	P.H. van Doesburg, Jr	Adult Female	RMNH	G. Zhang	2012			Label
Other material	Zelus erythrocephalus	Fabricius, 1803	UCR_ENT 00023662	Reduviidae	Zelus	erythrocephalus	SURINAME	Unknown		Small village by Corpina Creek	5.5	-55.2167	1959-08-29	P.H. van Doesburg, Jr	Adult Female	RMNH	G. Zhang	2012			Label
Other material	Zelus erythrocephalus	Fabricius, 1803	UCR_ENT 00029300	Reduviidae	Zelus	erythrocephalus	UNKNOWN	unknown		Unknown			no date provided	Unknown	Adult Male	USNM	G. Zhang	2012	Genitalia dissected. Lable reads: 9V
Other material	Zelus erythrocephalus	Fabricius, 1803	UCR_ENT 00075103	Reduviidae	Zelus	erythrocephalus	UNKNOWN	unknown		Habitat in America meridionali			No date provided	Dom. Smidt	Adult sex unknown	ZMUC	G. Zhang	2012
Lectotype	Zelus exsanguis	Stål, 1862	UCR_ENT 00075071	Reduviidae	Zelus	exsanguis	MEXICO	None or Unknown		unknown			No date provided	Signoret	Adult Female	NHMW	G. Zhang	2012	Lectotype of Zelus exsanguis Stål, 1862, designated by Hart (1986). Verbatim label info: Mexico coll. Signoret / exsanguis det. Stal / B.C.A. Rhyn.II. Zelus exsanguis St. / Lectotype Zelus exanguis Stal / designated by E. R. Hart / Lectotypus Zelus exsanguis STAL, 1862 etik. Hecher 1996 REDV. 470/1
Other material	Zelus exsanguis	Stål, 1862	UCR_ENT 00046957	Reduviidae	Zelus	exsanguis	COSTA RICA	Cartago		Pacayas	9.916	-83.809	no date provided	C. Werckele	Adult Male	AMNH	G. Zhang	2012			Google Earth	1724 m
Other material	Zelus exsanguis	Stål, 1862	UCR_ENT 00046960	Reduviidae	Zelus	exsanguis	COSTA RICA	Cartago		Pacayas	9.916	-83.809	no date provided	C. Werckele	Adult Female	AMNH	G. Zhang	2012			Google Earth	1724 m
Other material	Zelus exsanguis	Stål, 1862	UCR_ENT 00010850	Reduviidae	Zelus	exsanguis	COSTA RICA	San Jose		San Jose	9.9333	-84.0833	1957-07-01	Truxal & Menke	Adult Female	LACM	G. Zhang	2012			Gazetteer	1147 m
Other material	Zelus exsanguis	Stål, 1862	UCR_ENT 00031131	Reduviidae	Zelus	exsanguis	COSTA RICA	San Jose		San Jose	9.9333	-84.0833	1905-04-11	M. Valerio	Adult Male	USNM	G. Zhang	2012			Gazetteer
Other material	Zelus exsanguis	Stål, 1862	UCR_ENT 00031133	Reduviidae	Zelus	exsanguis	COSTA RICA	San Jose		San Jose	9.9333	-84.0833	1932-09-03	C.H. Ballou	Adult Female	USNM	G. Zhang	2012			Gazetteer
Other material	Zelus exsanguis	Stål, 1862	UCR_ENT 00031134	Reduviidae	Zelus	exsanguis	COSTA RICA	San Jose		San Jose	9.9333	-84.0833	1905-04-11	M. Valerio	Adult Female	USNM	G. Zhang	2012			Gazetteer
Other material	Zelus exsanguis	Stål, 1862	UCR_ENT 00031135	Reduviidae	Zelus	exsanguis	COSTA RICA	San Jose		San Jose	9.9333	-84.0833	1905-04-11	M. Valerio	Adult Female	USNM	G. Zhang	2012			Gazetteer
Other material	Zelus exsanguis	Stål, 1862	UCR_ENT 00031137	Reduviidae	Zelus	exsanguis	COSTA RICA	San Jose		San Jose	9.9333	-84.0833	1905-04-09	M. Valerio	Adult Female	USNM	G. Zhang	2012			Gazetteer
Other material	Zelus exsanguis	Stål, 1862	UCR_ENT 00047958	Reduviidae	Zelus	exsanguis	COSTA RICA	Unknown		Costa Rica			1904-03-01	P. Biolley	Adult Male	CAS	G. Zhang	2012
Other material	Zelus exsanguis	Stål, 1862	UCR_ENT 00009300	Reduviidae	Zelus	exsanguis	EL SALVADOR	La Libertad		Santa Tecla	13.7131	-89.3567	1959-10-01	N. L. H. Krauss	Adult Female	USNM	G. Zhang	2012
Other material	Zelus exsanguis	Stål, 1862	UCR_ENT 00046959	Reduviidae	Zelus	exsanguis	EL SALVADOR	La Libertad		Santa Tecla	13.6769	-89.2797	1905-05-04	J. Vincent	Adult Female	AMNH	G. Zhang	2012			Gazetteer	901 m
Other material	Zelus exsanguis	Stål, 1862	UCR_ENT 00046956	Reduviidae	Zelus	exsanguis	HONDURAS	Francisco Morazan		Tegucigalpa	14.1	-87.2167	1918-02-04	F. J. Dyer	Adult Male	AMNH	G. Zhang	2012			Gazetteer	981 m
Other material	Zelus exsanguis	Stål, 1862	UCR_ENT 00047702	Reduviidae	Zelus	exsanguis	HONDURAS	Francisco Morazan		Escuela Agricola Panamericano El Zamorano	14.008	-87.009	1960-12-21	P.H. & G.F. Freytag	Adult Female	AMNH	G. Zhang	2012			Google Earth	792 m
Other material	Zelus exsanguis	Stål, 1862	UCR_ENT 00047703	Reduviidae	Zelus	exsanguis	HONDURAS	Francisco Morazan		Escuela Agricola Panamericano El Zamorano	14.008	-87.009	1960-12-21	P.H. & G.F. Freytag	Adult Female	AMNH	G. Zhang	2012			Google Earth	792 m
Other material	Zelus exsanguis	Stål, 1862	UCR_ENT 00031132	Reduviidae	Zelus	exsanguis	HONDURAS	unknown		Tegucigalpa			1917-08-03	F. J. Dyer	Adult Female	USNM	G. Zhang	2012
Other material	Zelus exsanguis	Stål, 1862	UCR_ENT 00034250	Reduviidae	Zelus	exsanguis	MEXICO	Chiapas		Reserva El Ocote	16.995	-93.6406	1993-12-02 to 1993-12-10	G. Ortega, E. Barrera, A. Casasola	Adult Female	IBUNAM	G. Zhang	2012			Google Earth
Other material	Zelus exsanguis	Stål, 1862	UCR_ENT 00039903	Reduviidae	Zelus	exsanguis	MEXICO	Chiapas		22 mi. W Ocozocoautla	16.6845	-93.6282	1965-06-25	Burke, Meyer, Schaffner	Adult Female	TAMU	G. Zhang	2012			Google Earth
Other material	Zelus exsanguis	Stål, 1862	UCR_ENT 00031130	Reduviidae	Zelus	exsanguis	MEXICO	Coahuila		Santa Tecla	26.75	-102.017	1954-04-21	P.A.B.	Adult Male	USNM	G. Zhang	2012			Gazetteer
Other material	Zelus exsanguis	Stål, 1862	UCR_ENT 00040412	Reduviidae	Zelus	exsanguis	MEXICO	Colima		Volcan [de] Colima	19.0577	-104.291	1918-08-18	J. Laue	Adult Male	TAMU	G. Zhang	2012			Google Earth
Other material	Zelus exsanguis	Stål, 1862	UCR_ENT 00034248	Reduviidae	Zelus	exsanguis	MEXICO	Hidalgo		Laguna Ates, Molango	20.8028	-98.7424	1978-10-06	Harry Brailovsky	Adult Male	IBUNAM	G. Zhang	2012			Google Earth
Other material	Zelus exsanguis	Stål, 1862	UCR_ENT 00038421	Reduviidae	Zelus	exsanguis	MEXICO	Mexico		Temescaltepec	19.0333	-100.05	1933-06-05	H. E. Hinton & R. L. Usinger	Adult Male	UCB	G. Zhang	2012			Gazetteer
Other material	Zelus exsanguis	Stål, 1862	UCR_ENT 00041004	Reduviidae	Zelus	exsanguis	MEXICO	None or Unknown		Unknown			No date provided	salle	Adult Male	NHRS	G. Zhang	2012	Verbatim label info: Mexico / Salle / exsanguis Stal / Typus / NHRS-GULI 000000330
Other material	Zelus exsanguis	Stål, 1862	UCR_ENT 00075072	Reduviidae	Zelus	exsanguis	MEXICO	None or Unknown		unknown			No date provided	Signoret	Adult Female	NHMW	G. Zhang	2012	Verbatim label info: Mexico coll. Signoret / exsanguis det. Stal / Typus ? etik. Hecher 1996
Other material	Zelus exsanguis	Stål, 1862	UCR_ENT 00040256	Reduviidae	Zelus	exsanguis	MEXICO	Puebla		13.3 mi NE of Tehuitzingo	18.35	-98.2833	1974-07-13 to 1974-07-14	Clark, Murray, Ashe, Schaffner	Adult Female	TAMU	G. Zhang	2012			Gazetteer	1078 m
Other material	Zelus exsanguis	Stål, 1862	UCR_ENT 00042947	Reduviidae	Zelus	exsanguis	MEXICO	Sinaloa		Chirimollos, Hwy 40	23.4449	-105.838	2003-11-30	P. A. Opler	Adult Female	CSUC	G. Zhang	2012			Gazetteer
Other material	Zelus exsanguis	Stål, 1862	UCR_ENT 00036024	Reduviidae	Zelus	exsanguis	MEXICO	Tamaulipas		Cumbres de Ciudad Victoria	23.7392	-99.1408	1981-08-04	C. Beutelspacher	Adult Male	IBUNAM	G. Zhang	2012			Google Earth
Other material	Zelus exsanguis	Stål, 1862	UCR_ENT 00040254	Reduviidae	Zelus	exsanguis	MEXICO	Tamaulipas		74 mi S of Ciudad Victoria, W of Gomez Farias	22.6581	-99.1333	1985-11-15	P. Kovarik, R. Jones, K. Haack	Adult Female	TAMU	G. Zhang	2012
Other material	Zelus exsanguis	Stål, 1862	UCR_ENT 00040373	Reduviidae	Zelus	exsanguis	MEXICO	Tamaulipas		12 mi W of Ciudad Victoria, Altos Cumbres	23.7333	-99.3228	1987-03-17	Jones and Kovarik	Adult Male	AMNH	G. Zhang	2012
Other material	Zelus exsanguis	Stål, 1862	UCR_ENT 00031136	Reduviidae	Zelus	exsanguis	MEXICO	Veracruz		Cordoba	18.9	-96.9333	1900-05-16	Fredk. Knab	Adult Female	USNM	G. Zhang	2012			Gazetteer
Other material	Zelus exsanguis	Stål, 1862	UCR_ENT 00031138	Reduviidae	Zelus	exsanguis	MEXICO	Veracruz		Cordoba	18.9	-96.9333	no date provided	Fredk. Knab	Adult Female	USNM	G. Zhang	2012			GeoLocate Software
Other material	Zelus exsanguis	Stål, 1862	UCR_ENT 00034249	Reduviidae	Zelus	exsanguis	MEXICO	Veracruz		San Isidro			1980-10-03	R. Lopez	Adult Male	IBUNAM	G. Zhang	2012
Other material	Zelus exsanguis	Stål, 1862	UCR_ENT 00037115	Reduviidae	Zelus	exsanguis	MEXICO	Veracruz		Cordoba	18.9	-96.9333	1966-07-28	J. S. Buckett, M. R. and R. C. Gardner	Adult Female	UCD	G. Zhang	2012			GeoLocate Software
Other material	Zelus exsanguis	Stål, 1862	UCR_ENT 00046958	Reduviidae	Zelus	exsanguis	MEXICO	Veracruz		Cordoba	18.9	-96.9333	no date provided	Mann	Adult Female	AMNH	G. Zhang	2012			Gazetteer
Other material	Zelus exsanguis	Stål, 1862	UCR_ENT 00048013	Reduviidae	Zelus	exsanguis	NICARAGUA	Chinandega		Chinandega	12.6167	-87.15		Baker	Adult Female	CAS	G. Zhang	2012			Gazetteer	47 m
Other material	Zelus exsanguis	Stål, 1862	UCR_ENT 00037113	Reduviidae	Zelus	exsanguis	PANAMA	Chiriqui		Volcancito Arriba	8.78333	-82.4667	1994-07-11	J. E. White	Adult Male	UCD	G. Zhang	2012			Label
Holotype	Zelus fasciatus	Champion, 1899	UCR_ENT 00048758	Reduviidae	Zelus	fasciatus	PANAMA	Chiriqui		Bugaba	8.4833	-82.6167	No date provided	G.C. Champion	Adult Female	BMNH			Verbatim label info: Type / B.C.A.Rhyn.II. Zelus fasciatus Ch. / Sp. figured. / Bugaba, 800-1,500 ft. Champion. / Holotype Sel. E.R. Hart letter II.iii.76		Gazetteer	457 m
Other material	Zelus fasciatus	Champion, 1899	UCR_ENT 00021692	Reduviidae	Zelus	fasciatus	COLOMBIA	Antioquia		Puerto Berrio	6.49157	-74.4033	1938-08-12	Unknown	Adult Female	FMNH	G. Zhang	2012			Gazetteer
Other material	Zelus fasciatus	Champion, 1899	UCR_ENT 00036044	Reduviidae	Zelus	fasciatus	COLOMBIA	Choco		Riosucio Sautata	7.56528	-77.1407	1978-06-29	Horacio Echeverri	Adult Female	ICN	G. Zhang	2012			Google Earth		ICN 037825
Other material	Zelus fasciatus	Champion, 1899	UCR_ENT 00036045	Reduviidae	Zelus	fasciatus	COLOMBIA	Choco		Riosucio Sautata	7.56528	-77.1407	1978-06-12	Horacio Echeverri	Adult Female	ICN	G. Zhang	2012			Google Earth		ICN 037824
Other material	Zelus fasciatus	Champion, 1899	UCR_ENT 00040460	Reduviidae	Zelus	fasciatus	COLOMBIA	Cundinamarca		Fusagasuga	4.3455	-74.3569	1947-06-05	Richter	Adult Female	TAMU	G. Zhang	2012			Google Earth	1800 m
Other material	Zelus fasciatus	Champion, 1899	UCR_ENT 00040459	Reduviidae	Zelus	fasciatus	COLOMBIA	Meta		Rio Guamal [Quamal?]	3.7987	-73.6626	1948-01-01	Richter	Adult Female	TAMU	G. Zhang	2012			Google Earth	400 m
Other material	Zelus fasciatus	Champion, 1899	UCR_ENT 00036046	Reduviidae	Zelus	fasciatus	COLOMBIA	Risaralda		Mistrat≤, Puerto de Oro	5.2973	-75.8832	1991-09-01	Fernando Fernandez	Adult Female	ICN	G. Zhang	2012			Gazetteer	988 m	ICN 029499
Other material	Zelus fasciatus	Champion, 1899	UCR_ENT 00014358	Reduviidae	Zelus	fasciatus	COSTA RICA	Guanacaste		Estacion Pitilla, 9 km S Santa Cecilia, Parque Nacional Guanacaste	10.9538	-85.4849	1992-03-02 to 1992-03-09	C. Moraga	Adult Female	INBIO	G. Zhang	2012				700 m	INBIO CRI000 425086
Other material	Zelus fasciatus	Champion, 1899	UCR_ENT 00014321	Reduviidae	Zelus	fasciatus	COSTA RICA	Limon		Veragua Rainforest, Restauraut			2008-12-12	R. Villalobos	Adult Female	INBIO	G. Zhang	2012	Primary DNA voucher RCW_2648			420 m	INB0004186042
Other material	Zelus fasciatus	Champion, 1899	UCR_ENT 00014404	Reduviidae	Zelus	fasciatus	COSTA RICA	Limon		Veraguas Rainforest, Campamiento			2008-09-10	R. Villalobos	Adult Female	INBIO	G. Zhang	2012				420 m	INB0004215359
Other material	Zelus fasciatus	Champion, 1899	UCR_ENT 00019127	Reduviidae	Zelus	fasciatus	COSTA RICA	Limon		Guapiles	10.2167	-83.7833	1915-07-01	D. E. Harrower	Adult Female	CAS	G. Zhang	2012			Gazetteer	268 m
Other material	Zelus fasciatus	Champion, 1899	UCR_ENT 00014403	Reduviidae	Zelus	fasciatus	COSTA RICA	Puntarenas		Rancho Quemado, Peninsula de Osa	8.67776	-83.5648	1992-12-01	F. Quesada	Adult Female	INBIO	G. Zhang	2012			Label	200 m	CRI000920644
Other material	Zelus fasciatus	Champion, 1899	UCR_ENT 00014408	Reduviidae	Zelus	fasciatus	COSTA RICA	Puntarenas		Parque Nacional Manuel Antonio, Quepos	9.39361	-84.1292	1992-10-01	G. Varela	Adult Female	INBIO	G. Zhang	2012				80 m	INBIO CRI000 910244
Other material	Zelus fasciatus	Champion, 1899	UCR_ENT 00017723	Reduviidae	Zelus	fasciatus	PANAMA	Bocas del Toro		Changuinola	9.43333	-82.5167	1978-11-24	Engleman	Adult Female	AMNH	G. Zhang	2012	label indicates 5 mi So		Gazetteer
Other material	Zelus fasciatus	Champion, 1899	UCR_ENT 00009265	Reduviidae	Zelus	fasciatus	PANAMA	Canal Zone		Alhajuelo			1911-04-05	A. Busck	Adult Female	USNM	G. Zhang	2012
Other material	Zelus fasciatus	Champion, 1899	UCR_ENT 00009298	Reduviidae	Zelus	fasciatus	PANAMA	Canal Zone		Barro Colorado Island	9.16666	-79.8333	1964-12-11 to 1964-12-17	K. W. Cooper	Adult Female	USNM	G. Zhang	2012
Other material	Zelus fasciatus	Champion, 1899	UCR_ENT 00017715	Reduviidae	Zelus	fasciatus	PANAMA	Canal Zone		Fort Sherman	9.33333	-79.9667	1973-10-03	D. Engleman	Adult Female	AMNH	G. Zhang	2012			Label
Other material	Zelus fasciatus	Champion, 1899	UCR_ENT 00017716	Reduviidae	Zelus	fasciatus	PANAMA	Canal Zone		Pipeline Road			1974-06-30	D. Engleman	Adult Female	AMNH	G. Zhang	2012
Other material	Zelus fasciatus	Champion, 1899	UCR_ENT 00017717	Reduviidae	Zelus	fasciatus	PANAMA	Canal Zone		Escobal Road	9.21739	-79.9558	1975-06-21	D. Engleman	Adult Female	AMNH	G. Zhang	2012			Google Earth
Other material	Zelus fasciatus	Champion, 1899	UCR_ENT 00017718	Reduviidae	Zelus	fasciatus	PANAMA	Canal Zone		Fort Sherman	9.33333	-79.9667	1976-12-05	D. Engleman	Adult Female	AMNH	G. Zhang	2012			Label
Other material	Zelus fasciatus	Champion, 1899	UCR_ENT 00017720	Reduviidae	Zelus	fasciatus	PANAMA	Canal Zone		Coco Solo Hospital	9.35	-79.85	1974-03-21	Engleman	Adult Female	AMNH	G. Zhang	2012			Label
Other material	Zelus fasciatus	Champion, 1899	UCR_ENT 00017722	Reduviidae	Zelus	fasciatus	PANAMA	Canal Zone		Escobal Road	9.21739	-79.9558	1973-09-20	D. Engleman	Adult Female	AMNH	G. Zhang	2012			Google Earth
Other material	Zelus fasciatus	Champion, 1899	UCR_ENT 00017726	Reduviidae	Zelus	fasciatus	PANAMA	Canal Zone		Barro Colorado Island	9.16666	-79.8333	1977-07-23	H. A. Hespenheide	Adult Female	AMNH	G. Zhang	2012			Gazetteer
Other material	Zelus fasciatus	Champion, 1899	UCR_ENT 00038422	Reduviidae	Zelus	fasciatus	PANAMA	Canal Zone		Gatun Spillway	9.35055	-79.8315	1975-06-28	D. Engleman	Adult Female	UCB	G. Zhang	2012			Google Earth
Other material	Zelus fasciatus	Champion, 1899	UCR_ENT 00046745	Reduviidae	Zelus	fasciatus	PANAMA	Canal Zone		Coco Solo Hospital	9.35	-79.85	1971-10-04	D. Engleman	Adult Female	AMNH	G. Zhang	2012			Label
Other material	Zelus fasciatus	Champion, 1899	UCR_ENT 00047441	Reduviidae	Zelus	fasciatus	PANAMA	Canal Zone		Pipeline Road			1984-07-07	D. Engleman	Adult Female	AMNH	G. Zhang	2012
Other material	Zelus fasciatus	Champion, 1899	UCR_ENT 00048012	Reduviidae	Zelus	fasciatus	PANAMA	Cocle		La Mesa, El Valle de Anton	8.61667	-80.1333	1987-01-31	Edward S. Ross	Adult Male	CAS	G. Zhang	2012			Gazetteer
Other material	Zelus fasciatus	Champion, 1899	UCR_ENT 00006078	Reduviidae	Zelus	fasciatus	PANAMA	Colon		Gatun	9.2693	-79.9177	1916-07-01 to 1916-08-01	D. E. Barrower	Adult Male	CAS	G. Zhang	2012
Other material	Zelus fasciatus	Champion, 1899	UCR_ENT 00017227	Reduviidae	Zelus	fasciatus	PANAMA	Colon		Margarita	9.19833	-80.1706	1983-09-29	D. Engleman	Adult Male	AMNH	G. Zhang	2012			Gazetteer	9 m
Other material	Zelus fasciatus	Champion, 1899	UCR_ENT 00017719	Reduviidae	Zelus	fasciatus	PANAMA	Colon		Pipeline Road, Gamboa	9.1167	-79.7	1972-07-22	D. Engleman	Adult Female	AMNH	G. Zhang	2012			Gazetteer
Other material	Zelus fasciatus	Champion, 1899	UCR_ENT 00017721	Reduviidae	Zelus	fasciatus	PANAMA	Colon		Pipeline Road, Gamboa	9.1167	-79.7	1972-07-22	D. Engleman	Adult Female	AMNH	G. Zhang	2012			Gazetteer
Other material	Zelus fasciatus	Champion, 1899	UCR_ENT 00017724	Reduviidae	Zelus	fasciatus	PANAMA	Colon		Achiote Road	9.2	-79.9833	1976-06-13	Engleman	Adult Female	AMNH	G. Zhang	2012			Label
Other material	Zelus fasciatus	Champion, 1899	UCR_ENT 00017725	Reduviidae	Zelus	fasciatus	PANAMA	Colon		Achiote Road	9.2	-79.9833	1976-06-13	Engleman	Adult Female	AMNH	G. Zhang	2012			Label
Other material	Zelus fasciatus	Champion, 1899	UCR_ENT 00019126	Reduviidae	Zelus	fasciatus	PANAMA	Colon		Gatun	9.2693	-79.9177	1930-03-01	T. O. Zschokke	Adult Female	CAS	G. Zhang	2012
Other material	Zelus fasciatus	Champion, 1899	UCR_ENT 00009266	Reduviidae	Zelus	fasciatus	PANAMA	Panama		Trinidad Rio			1912-03-29	A. Busck	Adult Female	USNM	G. Zhang	2012
Other material	Zelus fasciatus	Champion, 1899	UCR_ENT 00040458	Reduviidae	Zelus	fasciatus	PANAMA	Panama		Parque Nacional Soberania, Old Gamboa Road	9.08333	-79.6728	1999-08-12	J. C. Schaffner	Adult Female	TAMU	G. Zhang	2012			Label	40 m
Other material	Zelus fasciatus	Champion, 1899	UCR_ENT 00047005	Reduviidae	Zelus	fasciatus	PANAMA	Panama		Madden Forest, Canal Zone	9.08333	-79.5833	1980-07-12	D. Engleman	Adult Female	AMNH	G. Zhang	2012			Label
Other material	Zelus filicauda	Bergroth, 1893	UCR_ENT 00019043	Reduviidae	Zelus	filicauda	ECUADOR	Tungurahua		13 mi W. Mera, Napo-Pastaza	-1.4628	-78.2854	1955-02-12	E. I. Schlinger & E. S. Ross	Adult Male	CAS	G. Zhang	2012			Google Earth
Holotype	Zelus fuliginatus	Zhang and Hart, 2016	UCR_ENT 00007997	Reduviidae	Zelus	fuliginatus	COLOMBIA	Quindio		Salento	4.6375	-75.5703	1939-07-14	Richter	Adult Male	USNM	G. Zhang	2013			Gazetteer	1895 m
Paratype	Zelus fuliginatus	Zhang and Hart, 2016	UCR_ENT 00009462	Reduviidae	Zelus	fuliginatus	COLOMBIA	Santander		Rio Suarez	6.76667	-73.2667	1946-01-16	Richter	Adult Female	USNM	G. Zhang	2013	Previously designated as 'allotype' of his manuscript name Zelus fuliginatus by Hart, a type status not used in the formal publication of this name (Zhang et al.)		GeoLocate Software
Paratype	Zelus fuliginatus	Zhang and Hart, 2016	AMNH_PBI 00218883	Reduviidae	Zelus	fuliginatus	Ecuador	Napo		W bank of Rio Quijos	0.43333	-77.8833	2006-03-03	J.S. Miller & E. Tapia	Adult Male	UCR	G. Zhang	2013			Label	1750 m
Holotype	Zelus gilboventris	Zhang and Hart, 2016	UCR_ENT 00016769	Reduviidae	Zelus	gilboventris	BOLIVIA	Cochabamba		Villa Tunari, Chapare	-16.9167	-65.3667	1958-01-09	Wygodzinsky and Monros	Adult Male	AMNH	G. Zhang	2013				500 m
Paratype	Zelus gilboventris	Zhang and Hart, 2016	UCR_ENT 00038447	Reduviidae	Zelus	gilboventris	ECUADOR	Napo		Jatun Sacha Biological Station, 20 km E of Puerto Napo	-1.0644	-77.613	1989-01-14	E.A. Bergey and K.R. Hobson	Adult Male	UCB	G. Zhang	2013			Google Earth	450 m
Paratype	Zelus gilboventris	Zhang and Hart, 2016	UCR_ENT 00006074	Reduviidae	Zelus	gilboventris	PERU	Huanuco	Leoncio Prado	Monzon Valley, Tingo Maria	-9.29528	-75.9975	1954-10-15	E. I. Schlinger & E. S. Ross	Adult Female	CAS	G. Zhang	2013			Google Earth	648 m
Paratype	Zelus gilboventris	Zhang and Hart, 2016	UCR_ENT 00016997	Reduviidae	Zelus	gilboventris	PERU	Huanuco	Leoncio Prado	Tingo Maria	-9.3	-75.9833	1946-11-02	J. C. Pallister	Adult Male	AMNH	G. Zhang	2013				671 m
Paratype	Zelus gilboventris	Zhang and Hart, 2016	UCR_ENT 00016998	Reduviidae	Zelus	gilboventris	PERU	Huanuco		Upper Rio Huallaga	-9.2975	-76.005	1928-01-02	H. Bassler	Adult Female	AMNH	G. Zhang	2013			Google Earth
Paratype	Zelus gilboventris	Zhang and Hart, 2016	UCR_ENT 00016999	Reduviidae	Zelus	gilboventris	PERU	Huanuco	Leoncio Prado	Tingo Maria	-9.3	-75.9833	1905-04-29	J. C. Pallister	Adult Female	AMNH	G. Zhang	2013				671 m
Paratype	Zelus gilboventris	Zhang and Hart, 2016	UCR_ENT 00019700	Reduviidae	Zelus	gilboventris	PERU	Huanuco		Monzon valley, Tingo Maria	-9.27816	-76.0556	1954-09-23	E. I. Schlinger & E. S. Ross	Adult Female	CAS	G. Zhang	2013			Google Earth
Paratype	Zelus gilboventris	Zhang and Hart, 2016	UCR_ENT 00019701	Reduviidae	Zelus	gilboventris	PERU	Huanuco		Monzon valley, Tingo Maria	-9.27816	-76.0556	1954-11-02	E. I. Schlinger & E. S. Ross	Adult Female	CAS	G. Zhang	2013			Google Earth
Paratype	Zelus gilboventris	Zhang and Hart, 2016	UCR_ENT 00019702	Reduviidae	Zelus	gilboventris	PERU	Huanuco		Monzon valley, Tingo Maria	-9.27816	-76.0556	1954-11-21	E. I. Schlinger & E. S. Ross	Adult Female	CAS	G. Zhang	2013			Google Earth
Paratype	Zelus gilboventris	Zhang and Hart, 2016	UCR_ENT 00029356	Reduviidae	Zelus	gilboventris	PERU	Huanuco		Tingo Maria (Town of)	-9.3	-75.9833	1960-08-10	D. A. Young	Adult Male	USNM	G. Zhang	2013	Genitalia dissected. Paratype designated by Hart, unpublished		GeoLocate Software	671 m
Paratype	Zelus gilboventris	Zhang and Hart, 2016	UCR_ENT 00057801	Reduviidae	Zelus	gilboventris	PERU	Huanuco	Leoncio Prado	Tingo Maria	-9.3	-75.9833	1940-11-23	J. C. Pallister	Adult Female	AMNH	G. Zhang	2013	Previously designated as 'allotype', a concept not used in the formal publication of this name (Zhang et al.)			671 m
Paratype	Zelus gilboventris	Zhang and Hart, 2016	UCR_ENT 00029357	Reduviidae	Zelus	gilboventris	PERU	Junin		Satipo	-11.2667	-74.6833	1940-07-01	P. Papraychi	Adult Male	USNM	G. Zhang	2013	Drake collection		Gazetteer
Paratype	Zelus gilboventris	Zhang and Hart, 2016	UCR_ENT 00023700	Reduviidae	Zelus	gilboventris	PERU	unknown		Pachitea	-9.41667	-75.1667	no date provided	Unknown	Adult Male	RMNH	G. Zhang	2013			Gazetteer
Paratype	Zelus gilboventris	Zhang and Hart, 2016	UCR_ENT 00023702	Reduviidae	Zelus	gilboventris	PERU	unknown		Pachitea	-9.41667	-75.1667	no date provided	Unknown	Adult Male	RMNH	G. Zhang	2013			Gazetteer
Holotype	Zelus gracilipes	Zhang and Hart, 2016	UCR_ENT 00007998	Reduviidae	Zelus	gracilipes	BOLIVIA	La Paz		Tumupasa	-14.1487	-67.8876	Dec 1921-22	Mulford Bio. Expl	Adult Male	USNM	G. Zhang	2013	Genitalia dissected.		Google Earth	457 m
Paratype	Zelus gracilipes	Zhang and Hart, 2016	UCR_ENT 00009463	Reduviidae	Zelus	gracilipes	BOLIVIA	Cochabamba		Chapare	-16.711	-65.663	no date provided	Zischka	Adult Female	USNM	G. Zhang	2013			Google Earth
Paratype	Zelus gracilipes	Zhang and Hart, 2016	UCR_ENT 00071194	Reduviidae	Zelus	gracilipes	BOLIVIA	Cochabamba		Chapare	-16.711	-65.663	no date provided	Zischka	Adult Female	TAMU	G. Zhang	2013			Google Earth
Paratype	Zelus gracilipes	Zhang and Hart, 2016	UCR_ENT 00009296	Reduviidae	Zelus	gracilipes	BOLIVIA	none		Rio Negro			Jan	W. M. Mann	Adult Male	USNM	G. Zhang	2013	Additional Labels Mulford BioExpl 1921-1922
Paratype	Zelus gracilipes	Zhang and Hart, 2016	UCR_ENT 00009297	Reduviidae	Zelus	gracilipes	BRAZIL	Goias		Campinas	-16.6679	-49.2915	1905-04-17	T. Borgmeier	Adult Female	USNM	G. Zhang	2013			Google Earth
Paratype	Zelus gracilipes	Zhang and Hart, 2016	UCR_ENT 00009450	Reduviidae	Zelus	gracilipes	BRAZIL	Rondonia		62 km S Ariquemes, Fazenda Rancho Grande	-10.3	-62.8667	1996-07-03 to 1996-07-15	J. E. Eger	Adult Female	USNM	G. Zhang	2013				300 m
Paratype	Zelus gracilipes	Zhang and Hart, 2016	UCR_ENT 00009499	Reduviidae	Zelus	gracilipes	BRAZIL	Rondonia		62 km S Ariquemes, Fazenda Rancho Grande	-10.3	-62.8667	1997-11-04 to 1997-11-16	J. E. Eger	Adult Male	USNM	G. Zhang	2013	Drake Collection			300 m
Paratype	Zelus gracilipes	Zhang and Hart, 2016	UCR_ENT 00026166	Reduviidae	Zelus	gracilipes	BRAZIL	Rondonia		62 km SW of Ariquemes, near Fzda. Rancho Grande	-10.3292	-63.4688	1997-11-04 to 1997-11-16	J. E. Eger	Adult Male	USNM	G. Zhang	2013	Drake Collection
Paratype	Zelus gracilipes	Zhang and Hart, 2016	UCR_ENT 00026167	Reduviidae	Zelus	gracilipes	BRAZIL	Rondonia		62 km SW of Ariquemes, near Fzda. Rancho Grande	-10.3292	-63.4688	1997-11-04 to 1997-11-16	J. E. Eger	Adult Male	USNM	G. Zhang	2013	Drake Collection
Paratype	Zelus gracilipes	Zhang and Hart, 2016	UCR_ENT 00009449	Reduviidae	Zelus	gracilipes	ECUADOR	Napo		Puerto Misahuali	-1.0345	-77.6637	1998-09-06 to 1998-09-19	J. E. Eger	Adult Male	USNM	G. Zhang	2013			Label	541 m
Paratype	Zelus gracilipes	Zhang and Hart, 2016	UCR_ENT 00009492	Reduviidae	Zelus	gracilipes	ECUADOR	Napo		Puerto Misahuali	-1.0345	-77.6637	1998-09-06 to 1998-09-19	J. E. Eger	Adult Male	USNM	G. Zhang	2013	Drake Collection		Label	541 m
Paratype	Zelus gracilipes	Zhang and Hart, 2016	UCR_ENT 00047971	Reduviidae	Zelus	gracilipes	ECUADOR	Napo		Alinahui, 20 km E of Puerto Napo	-1	-77.4167	1992-12-01	E. S. Ross	Adult Male	CAS	G. Zhang	2013				450 m
Paratype	Zelus gracilipes	Zhang and Hart, 2016	UCR_ENT 00006075	Reduviidae	Zelus	gracilipes	PERU	Huanuco		Monzon valley, Tingo Maria	-9.27816	-76.0556	1954-09-23	E. I. Schlinger & E. S. Ross	Adult Female	CAS	G. Zhang	2013			Google Earth
Paratype	Zelus gracilipes	Zhang and Hart, 2016	UCR_ENT 00044265	Reduviidae	Zelus	gracilipes	PERU	Madre de Dios		Los Amigos Biol.Sta. trail 14	-12.5714	-70.0954	2010-12-20	C. Weirauch	Adult Female	UCR	G. Zhang	2013	Primary DNA voucher RCW_2474	General Collecting	GPS	231 m
Holotype	Zelus grandoculus	Zhang and Hart, 2016	UCR_ENT 00007999	Reduviidae	Zelus	grandoculus	GUATEMALA	Sacatepequez		Antigua	14.5611	-90.7344	no date provided	B. Lott	Adult Male	USNM	G. Zhang	2013	Genitalia dissected		Gazetteer	1583 m
Holotype	Zelus grassans	Stål, 1862	UCR_ENT 00075073	Reduviidae	Zelus	grassans	MEXICO							Signoret	Adult Female	NHMW	G. Zhang	2013	Verbatim label info: Mexico coll. Signoret / grassans det. Stal / B.C.A. Rhyn.II. Zelus grassans St. / Zelus grassans Stal / Holotype / Lectotypus Zelus grassans STAL, 1862 etik. Hecher 1996 REDV. 471/1
Other material	Zelus grassans	Stål, 1862	UCR_ENT 00001211	Reduviidae	Zelus	grassans	COSTA RICA	Guanacaste		Palo Verde National Park, nr OTS research station	10.3476	-85.3498	2008-12-04	Weirauch & Forero	Adult Male	UCR	G. Zhang	2012	Primary DNA voucher RCW_584	Sweep Netting	GPS	26 m
Other material	Zelus grassans	Stål, 1862	UCR_ENT 00014353	Reduviidae	Zelus	grassans	COSTA RICA	Guanacaste		Est. Murcielago, 8 km SO de Cuajiniquil	10.0032	-85.6625	1993-06-15 to 1993-07-03	Fam. Araya Coronado	Adult Female	INBIO	G. Zhang	2012			Google Earth	100 m
Other material	Zelus grassans	Stål, 1862	UCR_ENT 00014373	Reduviidae	Zelus	grassans	COSTA RICA	Guanacaste		Est. Murcielago, 8 km SO de Cuajiniquil	10.0032	-85.6625	1993-07-17 to 1993-08-02	F. Quesada	Adult Male	INBIO	G. Zhang	2012			Google Earth	100 m	INBIO CR1001649842
Other material	Zelus grassans	Stål, 1862	UCR_ENT 00014374	Reduviidae	Zelus	grassans	COSTA RICA	Guanacaste		Est. Murcielago, 8 km SO de Cuajiniquil	10.0032	-85.6625	1993-07-17 to 1993-08-02	F. Quesada	Adult Male	INBIO	G. Zhang	2012			Google Earth	100 m	INBIO CR1001649841
Other material	Zelus grassans	Stål, 1862	UCR_ENT 00014375	Reduviidae	Zelus	grassans	COSTA RICA	Guanacaste		Est. Murcielago, 8 km SO de Cuajiniquil	10.0032	-85.6625	1993-07-17 to 1993-08-02	F. Quesada	Adult Male	INBIO	G. Zhang	2012			Google Earth	100 m	INBIO CR1001649840
Other material	Zelus grassans	Stål, 1862	UCR_ENT 00022661	Reduviidae	Zelus	grassans	COSTA RICA	Guanacaste		2 mi NW Canas	10.4461	-85.1175	1974-05-18 to 1974-05-21	E. Giesbert	Adult Male	LACM	G. Zhang	2012			Google Earth		LACM ENT 264634
Other material	Zelus grassans	Stål, 1862	UCR_ENT 00030366	Reduviidae	Zelus	grassans	COSTA RICA	Guanacaste		Estacion Exper. Enrique Jimenez Nunez, (20 km SW canas)	10.2984	-85.2253	1991-11-05 to 1991-11-17	A. S. Menke	Adult Male	USNM	G. Zhang	2012			Google Earth
Other material	Zelus grassans	Stål, 1862	UCR_ENT 00034176	Reduviidae	Zelus	grassans	COSTA RICA	Guanacaste		4 km NW La Canas	10.4515	-85.1215	1975-09-15 to 1973-09-20	P. A. Opler	Adult Male	UCB	G. Zhang	2012			Google Earth
Other material	Zelus grassans	Stål, 1862	UCR_ENT 00034177	Reduviidae	Zelus	grassans	COSTA RICA	Guanacaste		4 km NW La Canas	10.4515	-85.1215	1975-09-15 to 1973-09-21	P. A. Opler	Adult Male	UCB	G. Zhang	2012			Google Earth
Other material	Zelus grassans	Stål, 1862	UCR_ENT 00034187	Reduviidae	Zelus	grassans	COSTA RICA	Guanacaste		4 mi NW Canas	10.4675	-85.1373	1972-05-23 to 1972-05-30	P. A. Opler	Adult Male	UCB	G. Zhang	2012			Google Earth
Other material	Zelus grassans	Stål, 1862	UCR_ENT 00044732	Reduviidae	Zelus	grassans	COSTA RICA	Guanacaste		4 mi E Canas	10.4266	-85.0369	1974-07-01	M. L. Siri	Adult Female	UCD	G. Zhang	2012			Google Earth
Other material	Zelus grassans	Stål, 1862	UCR_ENT 00030355	Reduviidae	Zelus	grassans	EL SALVADOR	La Libertad		La Libertad	13.4883	-89.3222	1959-10-01	N. L. H. Krauss	Adult Male	USNM	G. Zhang	2012			Gazetteer
Other material	Zelus grassans	Stål, 1862	UCR_ENT 00030371	Reduviidae	Zelus	grassans	EL SALVADOR	La Libertad		San Andres	13.8197	-89.4114	1944-07-20 to 1944-07-25	E. J. Hambleton	Adult Female	USNM	G. Zhang	2012			Gazetteer
Other material	Zelus grassans	Stål, 1862	UCR_ENT 00031169	Reduviidae	Zelus	grassans	EL SALVADOR	San Salvador		San Salvador	13.7086	-89.2031	1959-10-01	N. L. H. Krauss	Adult Female	USNM	G. Zhang	2012			Gazetteer	659 m
Other material	Zelus grassans	Stål, 1862	UCR_ENT 00030357	Reduviidae	Zelus	grassans	GUATEMALA	Alta Verapaz		Candelaria, Bolin, Senehu	15.65	-90.0333	1963-11-23	Unknown	Adult Male	USNM	G. Zhang	2012			Gazetteer
Other material	Zelus grassans	Stål, 1862	UCR_ENT 00042928	Reduviidae	Zelus	grassans	GUATEMALA	Alta Verapaz		Chibite, Rio Cahabon	15.4167	-89.6	1989-01-03	L.B. Bjostad	Adult Female	CSUC	G. Zhang	2012			Gazetteer
Other material	Zelus grassans	Stål, 1862	UCR_ENT 00030358	Reduviidae	Zelus	grassans	GUATEMALA	Escuintla		Escuintla	14.305	-90.785	1988-08-01	Fredk. Knab	Adult Male	USNM	G. Zhang	2012			Gazetteer	356 m
Other material	Zelus grassans	Stål, 1862	UCR_ENT 00032026	Reduviidae	Zelus	grassans	HONDURAS	El Paraφso		Choluteca R. Bridge, Tegucigalpa-Danli rd.	14.0584	-86.8503	1948-07-25	T. H. Hubbell	Adult Male	TAMU	G. Zhang	2012			Google Earth	594 m
Other material	Zelus grassans	Stål, 1862	UCR_ENT 00030359	Reduviidae	Zelus	grassans	HONDURAS	Francisco Morazan		Unknown			1965-11-02	N. L. H. Krauss	Adult Male	USNM	G. Zhang	2012
Other material	Zelus grassans	Stål, 1862	UCR_ENT 00030360	Reduviidae	Zelus	grassans	HONDURAS	Francisco Morazan		Tegucigalpa	14.1	-87.2167	no date provided	F. J. Dyer	Adult Male	USNM	G. Zhang	2012			Gazetteer	981 m
Other material	Zelus grassans	Stål, 1862	UCR_ENT 00030361	Reduviidae	Zelus	grassans	HONDURAS	Francisco Morazan		Tegucigalpa	14.1	-87.2167	1918-02-02	F. J. Dyer	Adult Male	USNM	G. Zhang	2012			Gazetteer	981 m
Other material	Zelus grassans	Stål, 1862	UCR_ENT 00030362	Reduviidae	Zelus	grassans	HONDURAS	Francisco Morazan		Tegucigalpa	14.1	-87.2167	1918-02-02	F. J. Dyer	Adult Male	USNM	G. Zhang	2012			Gazetteer	981 m
Other material	Zelus grassans	Stål, 1862	UCR_ENT 00030363	Reduviidae	Zelus	grassans	HONDURAS	Francisco Morazan		Tegucigalpa	14.1	-87.2167	1918-02-02	F. J. Dyer	Adult Male	USNM	G. Zhang	2012			Gazetteer	981 m
Other material	Zelus grassans	Stål, 1862	UCR_ENT 00030364	Reduviidae	Zelus	grassans	HONDURAS	Francisco Morazan		Tegucigalpa	14.1	-87.2167	1918-02-02	F. J. Dyer	Adult Male	USNM	G. Zhang	2012			Gazetteer	981 m
Other material	Zelus grassans	Stål, 1862	UCR_ENT 00030368	Reduviidae	Zelus	grassans	HONDURAS	Francisco Morazan		Tegucigalpa	14.1	-87.2167	1918-02-02	F. J. Dyer	Adult Female	USNM	G. Zhang	2012			Gazetteer	981 m
Other material	Zelus grassans	Stål, 1862	UCR_ENT 00030369	Reduviidae	Zelus	grassans	HONDURAS	Francisco Morazan		Tegucigalpa	14.1	-87.2167	1918-02-02	F. J. Dyer	Adult Female	USNM	G. Zhang	2012			Gazetteer	981 m
Other material	Zelus grassans	Stål, 1862	UCR_ENT 00030370	Reduviidae	Zelus	grassans	HONDURAS	Francisco Morazan		Tegucigalpa	14.1	-87.2167	1918-02-02	F. J. Dyer	Adult Female	USNM	G. Zhang	2012			Gazetteer	981 m
Other material	Zelus grassans	Stål, 1862	UCR_ENT 00032025	Reduviidae	Zelus	grassans	HONDURAS	Francisco Morazan		Escuela Agricola Panamericano El Zamorano	14.008	-87.009	1948-07-04	T. H. Hubbell	Adult Male	TAMU	G. Zhang	2012			Google Earth	792 m
Other material	Zelus grassans	Stål, 1862	UCR_ENT 00032027	Reduviidae	Zelus	grassans	HONDURAS	Francisco Morazan		Escuela Agricola Panamericano El Zamorano	14.008	-87.009	1948-07-11	T. H. Hubbell	Adult Male	TAMU	G. Zhang	2012			Google Earth	792 m
Other material	Zelus grassans	Stål, 1862	UCR_ENT 00032028	Reduviidae	Zelus	grassans	HONDURAS	Francisco Morazan		Escuela Agricola Panamericano El Zamorano	14.008	-87.009	1948-07-11	T. H. Hubbell	Adult Male	TAMU	G. Zhang	2012			Google Earth	793 m
Other material	Zelus grassans	Stål, 1862	UCR_ENT 00032029	Reduviidae	Zelus	grassans	HONDURAS	Francisco Morazan		Escuela Agricola Panamericano El Zamorano	14.008	-87.009	1948-07-23	T. H. Hubbell	Adult Male	TAMU	G. Zhang	2012			Google Earth	794 m
Other material	Zelus grassans	Stål, 1862	UCR_ENT 00032030	Reduviidae	Zelus	grassans	HONDURAS	Francisco Morazan		Escuela Agricola Panamericano El Zamorano	14.008	-87.009	1948-07-11	T. H. Hubbell	Adult Female	TAMU	G. Zhang	2012			Google Earth	795 m
Other material	Zelus grassans	Stål, 1862	UCR_ENT 00032031	Reduviidae	Zelus	grassans	HONDURAS	Francisco Morazan		Escuela Agricola Panamericano El Zamorano	14.008	-87.009	1948-07-11	T. H. Hubbell	Adult Female	TAMU	G. Zhang	2012			Google Earth	796 m
Other material	Zelus grassans	Stål, 1862	UCR_ENT 00032032	Reduviidae	Zelus	grassans	HONDURAS	Francisco Morazan		Escuela Agricola Panamericano El Zamorano	14.008	-87.009	1948-07-11	T. H. Hubbell	Adult Female	TAMU	G. Zhang	2012			Google Earth	797 m
Other material	Zelus grassans	Stål, 1862	UCR_ENT 00032033	Reduviidae	Zelus	grassans	HONDURAS	Francisco Morazan		Escuela Agricola Panamericano El Zamorano	14.008	-87.009	1948-07-11	T. H. Hubbell	Adult Female	TAMU	G. Zhang	2012			Google Earth	798 m
Other material	Zelus grassans	Stål, 1862	UCR_ENT 00032034	Reduviidae	Zelus	grassans	HONDURAS	Francisco Morazan		Escuela Agricola Panamericano El Zamorano	14.008	-87.009	1948-08-21	T. H. Hubbell	Adult Female	TAMU	G. Zhang	2012			Google Earth	792 m
Other material	Zelus grassans	Stål, 1862	UCR_ENT 00032042	Reduviidae	Zelus	grassans	HONDURAS	Francisco Morazan		Unknown			1990-11-05	D. Sagastone	Adult Female	TAMU	G. Zhang	2012
Other material	Zelus grassans	Stål, 1862	UCR_ENT 00040092	Reduviidae	Zelus	grassans	HONDURAS	Francisco Morazan		Escuela Agricola Panamericano El Zamorano	14.008	-87.009	1948-07-11	T. H. Hubbell	Adult Male	TAMU	G. Zhang	2012			Google Earth	792 m
Other material	Zelus grassans	Stål, 1862	UCR_ENT 00040093	Reduviidae	Zelus	grassans	HONDURAS	Francisco Morazan		Escuela Agricola Panamericano El Zamorano	14.008	-87.009	1948-07-11	T. H. Hubbell	Adult Female	TAMU	G. Zhang	2012			Google Earth	792 m
Other material	Zelus grassans	Stål, 1862	UCR_ENT 00029372	Reduviidae	Zelus	grassans	HONDURAS	unknown		Escuela Agricola Panamericana, El Zamorano	14	-87	no date provided	T. Palanco & A. Molens	Adult Male	USNM	G. Zhang	2012	Genitalia dissected, attached to specimen. Right fore tibia dissected.		Google Earth
Other material	Zelus grassans	Stål, 1862	UCR_ENT 00029973	Reduviidae	Zelus	grassans	HONDURAS	unknown		Honduras			1918-06-29	F. J. Dyer	Adult Male	USNM	G. Zhang	2012
Other material	Zelus grassans	Stål, 1862	UCR_ENT 00029975	Reduviidae	Zelus	grassans	HONDURAS	unknown		Honduras			1918-06-29	F. J. Dyer	Adult Male	USNM	G. Zhang	2012
Other material	Zelus grassans	Stål, 1862	UCR_ENT 00029976	Reduviidae	Zelus	grassans	HONDURAS	unknown		Honduras			1918-06-29	F. J. Dyer	Adult Male	USNM	G. Zhang	2012
Other material	Zelus grassans	Stål, 1862	UCR_ENT 00029977	Reduviidae	Zelus	grassans	HONDURAS	unknown		Honduras			1918-06-29	F. J. Dyer	Adult Female	USNM	G. Zhang	2012
Other material	Zelus grassans	Stål, 1862	UCR_ENT 00029978	Reduviidae	Zelus	grassans	HONDURAS	unknown		Tegucigalpa (Dept/State Unknown)			1918-02-13	F. J. Dyer	Adult Male	USNM	G. Zhang	2012
Other material	Zelus grassans	Stål, 1862	UCR_ENT 00029979	Reduviidae	Zelus	grassans	HONDURAS	unknown		Tegucigalpa (Dept/State Unknown)			1917-08-25	F. J. Dyer	Adult Female	USNM	G. Zhang	2012
Other material	Zelus grassans	Stål, 1862	UCR_ENT 00029980	Reduviidae	Zelus	grassans	HONDURAS	unknown		Tegucigalpa (Dept/State Unknown)			1917-08-02	F. J. Dyer	Adult Female	USNM	G. Zhang	2012
Other material	Zelus grassans	Stål, 1862	UCR_ENT 00029981	Reduviidae	Zelus	grassans	HONDURAS	unknown		Tegucigalpa (Dept/State Unknown)			1917-08-06	F. J. Dyer	Adult Female	USNM	G. Zhang	2012
Other material	Zelus grassans	Stål, 1862	UCR_ENT 00034492	Reduviidae	Zelus	grassans	HONDURAS	unknown		Cedros	14.5833	-87.25	1976-11-11	Unknown	Adult sex unknown	UMSP	G. Zhang	2012			Gazetteer
Other material	Zelus grassans	Stål, 1862	UCR_ENT 00044754	Reduviidae	Zelus	grassans	MEXICO	Chiapas		20 mi S Tuxtla Gutierrez	16.4588	-93.1166	1963-08-12	F. D. Parker and L. A. Stange	Adult Female	UCD	G. Zhang	2012			Google Earth
Other material	Zelus grassans	Stål, 1862	UCR_ENT 00025691	Reduviidae	Zelus	grassans	MEXICO	Colima		La Salada	19.05	-103.783	1978-11-06 to 1978-11-12	C. Velazquez	Adult Female	IBUNAM	G. Zhang	2012			GeoLocate Software
Other material	Zelus grassans	Stål, 1862	UCR_ENT 00030372	Reduviidae	Zelus	grassans	MEXICO	Colima		Unknown			no date provided	Conradt	Adult Female	USNM	G. Zhang	2012
Other material	Zelus grassans	Stål, 1862	UCR_ENT 00034178	Reduviidae	Zelus	grassans	MEXICO	Guerrero		Iguala	18.3653	-99.5509	1981-08-17	J. Chemsak & A. & M. Michelbacher	Adult Male	UCB	G. Zhang	2012			Google Earth
Other material	Zelus grassans	Stål, 1862	UCR_ENT 00034179	Reduviidae	Zelus	grassans	MEXICO	Guerrero		Iguala	18.3653	-99.5509	1981-08-18	J. Chemsak & A. & M. Michelbacher	Adult Female	UCB	G. Zhang	2012			Google Earth
Other material	Zelus grassans	Stål, 1862	UCR_ENT 00034226	Reduviidae	Zelus	grassans	MEXICO	Guerrero		Zihuatanejo (possibly misspelled Zihuantayo)	17.6367	-101.551	2009-12-25 to 2009-12-29	H. Brailovsky	Adult Male	IBUNAM	G. Zhang	2012			Gazetteer
Other material	Zelus grassans	Stål, 1862	UCR_ENT 00034185	Reduviidae	Zelus	grassans	MEXICO	Jalisco		Estacion de Biologia, Chamela	19.4885	-105.044	1987-07-07 to 1987-07-15	J. A. Chemsak & E. G. & J. M. Linsley	Adult Male	UCB	G. Zhang	2012			Google Earth	93 m
Other material	Zelus grassans	Stål, 1862	UCR_ENT 00034227	Reduviidae	Zelus	grassans	MEXICO	Mexico		Santo Tomas de Los Platanos			1991-01-31	H. Brailovsky	Adult Male	IBUNAM	G. Zhang	2012
Other material	Zelus grassans	Stål, 1862	UCR_ENT 00032035	Reduviidae	Zelus	grassans	MEXICO	Michoacan		10 mi S of Uruapan	19.2982	-102.079	1990-04-11	Ferreira and Schaffner	Adult Female	TAMU	G. Zhang	2012			Google Earth
Other material	Zelus grassans	Stål, 1862	UCR_ENT 00040406	Reduviidae	Zelus	grassans	MEXICO	Michoacan		10 mi S of Uruapan	19.2982	-102.079	1990-04-11	Ferreira and Schaffner	Adult Male	TAMU	G. Zhang	2012			Google Earth
Other material	Zelus grassans	Stål, 1862	UCR_ENT 00025682	Reduviidae	Zelus	grassans	MEXICO	Morelos		2.5 km N, 4 km W Hautla, Estacion CEAMISH	18.4612	-99.0413	1996-03-13	Unknown	Adult Male	IBUNAM	G. Zhang	2012			Label	940 m
Other material	Zelus grassans	Stål, 1862	UCR_ENT 00025685	Reduviidae	Zelus	grassans	MEXICO	Morelos		Reserva de Huautla Estacion (CEAMISH)			1996-01-13 to 1996-01-18	A. Perez	Adult Male	IBUNAM	G. Zhang	2012
Other material	Zelus grassans	Stål, 1862	UCR_ENT 00034186	Reduviidae	Zelus	grassans	MEXICO	Morelos		Tequesquito	18.6	-99.2667	1956-07-07	K. H. Janzen	Adult Male	UCB	G. Zhang	2012			Gazetteer
Other material	Zelus grassans	Stål, 1862	UCR_ENT 00044753	Reduviidae	Zelus	grassans	MEXICO	Morelos		5 m E of Cuernavaca	18.934	-99.1553	1962-03-29	L. A. Stange	Adult Male	UCD	G. Zhang	2012			Google Earth
Other material	Zelus grassans	Stål, 1862	UCR_ENT 00025683	Reduviidae	Zelus	grassans	MEXICO	Nayarit		Rio Santiago, Las Adjuntas	21.9601	-104.526	1991-07-11 to 1991-07-13	E. Barrera, R. Barba	Adult Female	IBUNAM	G. Zhang	2012			Google Earth
Other material	Zelus grassans	Stål, 1862	UCR_ENT 00032024	Reduviidae	Zelus	grassans	MEXICO	None or Unknown		unknown			2009-01-01	E. Hart	Adult Male	TAMU	G. Zhang	2012
Other material	Zelus grassans	Stål, 1862	UCR_ENT 00034191	Reduviidae	Zelus	grassans	MEXICO	Oaxaca		Temascal	18.2388	-96.4003	1963-10-13	K. H. Janzen	Adult Female	UCB	G. Zhang	2012
Other material	Zelus grassans	Stål, 1862	UCR_ENT 00070056	Reduviidae	Zelus	grassans	MEXICO	Oaxaca		El Laurel	17.0913	-96.7655	1970-07-07	R. E. Beer and party	Adult Female	KU	G. Zhang	2012			Google Earth
Other material	Zelus grassans	Stål, 1862	UCR_ENT 00025681	Reduviidae	Zelus	grassans	MEXICO	Puebla		Azumbilla	18.6667	-97.4167	1992-09-11	G. Ortega, E. Barrera	Adult Male	IBUNAM	G. Zhang	2012			Gazetteer
Other material	Zelus grassans	Stål, 1862	UCR_ENT 00032036	Reduviidae	Zelus	grassans	MEXICO	Puebla		Matamoros	18.6	-92.4667	1948-09-10	H. O. Wagner	Adult Female	TAMU	G. Zhang	2012			Gazetteer
Other material	Zelus grassans	Stål, 1862	UCR_ENT 00044755	Reduviidae	Zelus	grassans	MEXICO	Puebla		3 mi N of Petlalcingo	18.0831	-97.9179	1963-08-03	F. D. Parker and L. A. Stange	Adult Female	UCD	G. Zhang	2012			Google Earth
Other material	Zelus grassans	Stål, 1862	UCR_ENT 00070055	Reduviidae	Zelus	grassans	MEXICO	Puebla		2 mi N of Izucar de Matamoros	18.6228	-98.4705	1969-08-18	University of Kansas Mexico Expedition	Adult Female	KU	G. Zhang	2012			Google Earth	1402 m
Other material	Zelus grassans	Stål, 1862	UCR_ENT 00070057	Reduviidae	Zelus	grassans	MEXICO	Puebla		2 mi N Izucar de Matamoros			1969-08-07	G. W. Byers	Adult Male	KU	G. Zhang	2012				1280 m
Other material	Zelus grassans	Stål, 1862	UCR_ENT 00070054	Reduviidae	Zelus	grassans	MEXICO	Queretaro		Jalapan de Serra, along Rio Jalpan	21.2106	-99.4715	1991-09-03	D. Yanega	Adult Female	KU	G. Zhang	2012			Google Earth	770 m
Other material	Zelus grassans	Stål, 1862	UCR_ENT 00070058	Reduviidae	Zelus	grassans	MEXICO	Queretaro		Jalapan de Serra, along Rio Jalpan	21.2106	-99.4715	1991-09-03	D. Yanega	Adult Male	KU	G. Zhang	2012			Google Earth	770 m
Other material	Zelus grassans	Stål, 1862	UCR_ENT 00070059	Reduviidae	Zelus	grassans	MEXICO	Queretaro		Jalapan de Serra, along Rio Jalpan	21.2106	-99.4715	1991-09-03	D. Yanega	Adult Male	KU	G. Zhang	2012			Google Earth	770 m
Other material	Zelus grassans	Stål, 1862	UCR_ENT 00017179	Reduviidae	Zelus	grassans	MEXICO	San Luis Potosi		San Luis Potosi	32.5072	-115.126	1959-07-01	L. R. Steude	Adult Female	AMNH	G. Zhang	2012			GeoLocate Software
Other material	Zelus grassans	Stål, 1862	UCR_ENT 00030353	Reduviidae	Zelus	grassans	MEXICO	San Luis Potosi	Tamazunchale	Tamazunchale	21.2667	-98.7833	1967-08-18	G. F. Hevel	Adult Male	USNM	G. Zhang	2012
Other material	Zelus grassans	Stål, 1862	UCR_ENT 00034188	Reduviidae	Zelus	grassans	MEXICO	Sinaloa		5 mi N of Mazatlan	23.2889	-106.417	1980-12-12	J. A. Chemsak	Adult Female	UCB	G. Zhang	2012
Other material	Zelus grassans	Stål, 1862	UCR_ENT 00034189	Reduviidae	Zelus	grassans	MEXICO	Sinaloa		Mazatlan	23.2167	-106.417	1952-07-27	J. D. Lattin	Adult Male	UCB	G. Zhang	2012
Other material	Zelus grassans	Stål, 1862	UCR_ENT 00034190	Reduviidae	Zelus	grassans	MEXICO	Sinaloa		Mazatlan	23.2167	-106.417	1952-07-27	J. D. Lattin	Adult Male	UCB	G. Zhang	2012
Other material	Zelus grassans	Stål, 1862	UCR_ENT 00042927	Reduviidae	Zelus	grassans	MEXICO	Sinaloa		2 mi N Copala	23.4063	-105.904	2003-11-28	P. A. Opler	Adult Male	CSUC	G. Zhang	2012			Google Earth
Other material	Zelus grassans	Stål, 1862	UCR_ENT 00030351	Reduviidae	Zelus	grassans	MEXICO	Sonora	Nacosari de Garcia	Navojoa	27.064	-109.44	1963-07-14	P. J. Spangler	Adult Male	USNM	G. Zhang	2012			Google Earth	46 m
Other material	Zelus grassans	Stål, 1862	UCR_ENT 00030354	Reduviidae	Zelus	grassans	MEXICO	Sonora		Yaqui	27.3809	-110.13	1976-08-09	F. Pacheco M.	Adult Male	USNM	G. Zhang	2012			Google Earth
Other material	Zelus grassans	Stål, 1862	UCR_ENT 00025687	Reduviidae	Zelus	grassans	MEXICO	Tamaulipas		Matamoros Puente	25.9333	-97.45	1942-08-28	F. Islas	Adult Male	IBUNAM	G. Zhang	2012			Gazetteer
Other material	Zelus grassans	Stål, 1862	UCR_ENT 00030350	Reduviidae	Zelus	grassans	MEXICO	Tamaulipas		Tampico	22.2167	-97.85	1958-06-30	H.D. Smith	Adult Male	TAMU	G. Zhang	2012				2 m
Other material	Zelus grassans	Stål, 1862	UCR_ENT 00030352	Reduviidae	Zelus	grassans	MEXICO	Tamaulipas		Tampico	22.2167	-97.85	1958-06-30	H.D. Smith	Adult Male	USNM	G. Zhang	2012				2 m
Other material	Zelus grassans	Stål, 1862	UCR_ENT 00030373	Reduviidae	Zelus	grassans	MEXICO	Tamaulipas		Tampico	22.2167	-97.85	1958-06-30	Unknown	Adult Female	USNM	G. Zhang	2012				2 m
Other material	Zelus grassans	Stål, 1862	UCR_ENT 00042016	Reduviidae	Zelus	grassans	MEXICO	Yucatan		Chichen Itza	20.6667	-88.5667	1978-10-01	Heiss	Adult Male	ZSM	G. Zhang	2012
Other material	Zelus grassans	Stål, 1862	UCR_ENT 00030367	Reduviidae	Zelus	grassans	NICARAGUA	Managua		Managua	12.1508	-86.2683	1944-08-17	E. J. Hambleton	Adult Female	USNM	G. Zhang	2012
Other material	Zelus grassans	Stål, 1862	UCR_ENT 00047439	Reduviidae	Zelus	grassans	PANAMA	Canal Zone		Fort Kobbe	8.9	-79.5833	1980-09-01	H. D. Engleman	Adult Male	AMNH	G. Zhang	2012	Mating pair with: UCR_ENT 47440		Google Earth
Other material	Zelus grassans	Stål, 1862	UCR_ENT 00047440	Reduviidae	Zelus	grassans	PANAMA	Canal Zone		Fort Kobbe	8.9	-79.5833	1980-09-01	H. D. Engleman	Adult Female	AMNH	G. Zhang	2012	Mating pair with: UCR_ENT 47439		Google Earth
Lectotype	Zelus illotus	Berg, 1879		Reduviidae	Zelus	illotus	ARGENTINA	Corrientes		Corrientes	-27.4841	-58.8096	no date provided	Unknown	Adult Male	Unversidad Nacional de La Plata	E.R. Hart 1972		Designated as lectotype by Hart (1987). Bears the following labels: Typus/Corrientes/1554/Lectotype, designated by E.R. Hart		Google map
Allolectotype	Zelus illotus	Berg, 1879		Reduviidae	Zelus	illotus	ARGENTINA	Corrientes		Corrientes	-27.4841	-58.8096	no date provided	Unknown	Adult Female	Unversidad Nacional de La Plata	E.R. Hart 1972		Designated as lectotype by Hart (1987). Bears the following labels: Typus/Corrientes/Zelus illotus Bert/168(9)/1554/Allolectotype, designated by E.R. Hart		Google map
Other Material	Zelus illotus	Berg, 1879		Reduviidae	Zelus	illotus	BRAZIL	Matto Grosso		Chavantina, Rio des Mortes	-14.6667	-52.35	1947-06	J.C.M Carvalho	Adult Male	Museu Nacionaldo Rio de Janeiro	E.R. Hart 1972		Holotype of Zelus carvalhoi Wygodzinsky, 1947, a junior synonym of Zelus illotus Berg, 1879 (Hart, 1987)		Gazetteer
Other Material	Zelus illotus	Berg, 1879		Reduviidae	Zelus	illotus	BRAZIL	Matto Grosso		Chavantina, Rio des Mortes	-14.6667	-52.35	1947-06	J.C.M Carvalho	Adult Male	Instituto de Ecologia e Experimentacao Agricola, Rio de Janeiro	E.R. Hart 1972		Paratype of Zelus carvalhoi Wygodzinsky, 1947, a junior synonym of Zelus illotus Berg, 1879 (Hart, 1987)		Gazetteer
Other Material	Zelus illotus	Berg, 1879		Reduviidae	Zelus	illotus	BRAZIL	Matto Grosso		Chavantina	-14.6667	-52.35	1946-10	H. Sick	Adult Male	None			Paratype of Zelus carvalhoi Wygodzinsky, 1947, a junior synonym of Zelus illotus Berg, 1879 (Hart, 1987). Present location of specimen not known.		Gazetteer
Other material	Zelus illotus	Berg, 1879	UCR_ENT 00029418	Reduviidae	Zelus	illotus	ARGENTINA	Formosa		Formosa, Arroyo Guaycolec	-26.1833	-58.1833	1989-04-25	A. M. Gomez	Adult Male	USNM	G. Zhang	2012			Gazetteer
Other material	Zelus illotus	Berg, 1879	UCR_ENT 00029419	Reduviidae	Zelus	illotus	ARGENTINA	Formosa		Formosa, Arroyo Guaycolec	-26.1833	-58.1833	1989-04-25	A. M. Gomez	Adult Male	USNM	G. Zhang	2012			Gazetteer
Other material	Zelus illotus	Berg, 1879	UCR_ENT 00029420	Reduviidae	Zelus	illotus	ARGENTINA	Formosa		Formosa, Arroyo Guaycolec	-26.1833	-58.1833	1989-04-25	A. M. Gomez	Adult Male	USNM	G. Zhang	2012			Gazetteer
Other material	Zelus illotus	Berg, 1879	UCR_ENT 00029421	Reduviidae	Zelus	illotus	ARGENTINA	Formosa		Formosa, Arroyo Guaycolec	-26.1833	-58.1833	1989-04-25	A. M. Gomez	Adult Male	USNM	G. Zhang	2012			Gazetteer
Other material	Zelus illotus	Berg, 1879	UCR_ENT 00029422	Reduviidae	Zelus	illotus	ARGENTINA	Formosa		Formosa, Arroyo Guaycolec	-26.1833	-58.1833	1989-04-25	A. M. Gomez	Adult Male	USNM	G. Zhang	2012			Gazetteer
Other material	Zelus illotus	Berg, 1879	UCR_ENT 00029423	Reduviidae	Zelus	illotus	ARGENTINA	Formosa		Formosa, Arroyo Guaycolec	-26.1833	-58.1833	1989-04-25	A. M. Gomez	Adult Male	USNM	G. Zhang	2012			Gazetteer
Other material	Zelus illotus	Berg, 1879	UCR_ENT 00029424	Reduviidae	Zelus	illotus	ARGENTINA	Formosa		Formosa, Arroyo Guaycolec	-26.1833	-58.1833	1989-04-25	A. M. Gomez	Adult Male	USNM	G. Zhang	2012			Gazetteer
Other material	Zelus illotus	Berg, 1879	UCR_ENT 00029425	Reduviidae	Zelus	illotus	ARGENTINA	Formosa		Formosa, Arroyo Guaycolec	-26.1833	-58.1833	1989-04-25	A. M. Gomez	Adult Female	USNM	G. Zhang	2012			Gazetteer
Other material	Zelus illotus	Berg, 1879	UCR_ENT 00029426	Reduviidae	Zelus	illotus	ARGENTINA	Formosa		Formosa, Arroyo Guaycolec	-26.1833	-58.1833	1989-04-25	A. M. Gomez	Adult Female	USNM	G. Zhang	2012			Gazetteer
Other material	Zelus illotus	Berg, 1879	UCR_ENT 00029427	Reduviidae	Zelus	illotus	ARGENTINA	Formosa		Formosa, Arroyo Guaycolec	-26.1833	-58.1833	1989-04-25	A. M. Gomez	Adult Female	USNM	G. Zhang	2012			Gazetteer
Other material	Zelus illotus	Berg, 1879	UCR_ENT 00029428	Reduviidae	Zelus	illotus	ARGENTINA	Formosa		Formosa, Arroyo Guaycolec	-26.1833	-58.1833	1989-04-25	A. M. Gomez	Adult Female	USNM	G. Zhang	2012			Gazetteer
Other material	Zelus illotus	Berg, 1879	UCR_ENT 00029429	Reduviidae	Zelus	illotus	ARGENTINA	Formosa		Formosa, Arroyo Guaycolec	-26.1833	-58.1833	1989-04-10	A. M. Gomez	Adult Male	USNM	G. Zhang	2012			Gazetteer
Other material	Zelus illotus	Berg, 1879	UCR_ENT 00029430	Reduviidae	Zelus	illotus	ARGENTINA	Formosa		Formosa, Arroyo Guaycolec	-26.1833	-58.1833	1989-04-10	A. M. Gomez	Adult Female	USNM	G. Zhang	2012			Gazetteer
Other material	Zelus illotus	Berg, 1879	UCR_ENT 00029431	Reduviidae	Zelus	illotus	ARGENTINA	Formosa		Formosa, Arroyo Guaycolec	-26.1833	-58.1833	1989-04-10	A. M. Gomez	Adult Female	USNM	G. Zhang	2012			Gazetteer
Other material	Zelus illotus	Berg, 1879	UCR_ENT 00029414	Reduviidae	Zelus	illotus	BOLIVIA	El Beni		Ivon	-11.129	-66.1308	February 1921-1922	W. M. Mann	Adult Female	USNM	G. Zhang	2012			Google Earth	143 m
Other material	Zelus illotus	Berg, 1879	UCR_ENT 00042150	Reduviidae	Zelus	illotus	BOLIVIA	El Beni		Rio Yacuma Espiritu	-13.8522	-65.7735	1950-08-03	Unknown	Adult Male	ZSM	G. Zhang	2012			Google Earth	250 m
Other material	Zelus illotus	Berg, 1879	UCR_ENT 00029435	Reduviidae	Zelus	illotus	BOLIVIA	La Paz		Rio Zongo	-15.7167	-67.6833	1984-10-24 to 1984-12-08	L. E. Pe±a	Adult Male	USNM	G. Zhang	2012	Drake collection		Gazetteer	1400 m
Other material	Zelus illotus	Berg, 1879	UCR_ENT 00046903	Reduviidae	Zelus	illotus	BOLIVIA	Santa Cruz		Sara	-17	-63.583	no date provided	Steinbach	Adult Male	AMNH	G. Zhang	2012
Other material	Zelus illotus	Berg, 1879	UCR_ENT 00046918	Reduviidae	Zelus	illotus	BOLIVIA	Santa Cruz		Sara	-17	-63.583	no date provided	Steinbach	Adult Female	AMNH	G. Zhang	2012
Other material	Zelus illotus	Berg, 1879	UCR_ENT 00046919	Reduviidae	Zelus	illotus	BOLIVIA	Santa Cruz		Sara	-17	-63.583	no date provided	Steinbach	Adult Female	AMNH	G. Zhang	2012
Other material	Zelus illotus	Berg, 1879	UCR_ENT 00046920	Reduviidae	Zelus	illotus	BOLIVIA	Santa Cruz		Sara	-17	-63.583	no date provided	Steinbach	Adult Female	AMNH	G. Zhang	2012
Other material	Zelus illotus	Berg, 1879	UCR_ENT 00046902	Reduviidae	Zelus	illotus	BOLIVIA	unknown		Lagunillas			1917-11-01	Unknown	Adult Male	AMNH	G. Zhang	2012
Other material	Zelus illotus	Berg, 1879	UCR_ENT 00042149	Reduviidae	Zelus	illotus	BRAZIL	Alagoas		Japaratinga	-9.0833	-35.25	1987-01-10	Schmid-Egger	Adult Male	ZSM	G. Zhang	2012			Gazetteer
Other material	Zelus illotus	Berg, 1879	UCR_ENT 00042151	Reduviidae	Zelus	illotus	BRAZIL	Alagoas		Japaratinga	-9.0833	-35.25	1987-01-10	Schmid-Egger	Adult Female	ZSM	G. Zhang	2012			Gazetteer
Other material	Zelus illotus	Berg, 1879	UCR_ENT 00042152	Reduviidae	Zelus	illotus	BRAZIL	Alagoas		Japaratinga	-9.0833	-35.25	1987-01-10	Schmid-Egger	Adult Female	ZSM	G. Zhang	2012			Gazetteer
[truncated: 8,845 more rows]
[truncated: 2 more columns]
