# Supplementary material for: A taxonomic monograph of the assassin bug genus Zelus Fabricius (Hemiptera: Reduviidae): 71 species based on 10,000 specimens
Source: Biodivers Data J. 2016 Jul 8;(4):e8150. doi: 10.3897/BDJ.4.e8150 (PMC5019016; doi:10.3897/BDJ.4.e8150)
Supplement: Supplementary material 2 — Measurements of species of Zelus Fabricius, 1803 [file biodiversity_data_journal-4-e8150-s002.xlsx]

## Sheet: all.species
			Length																					Width
species			Total	Clyp-Abd	Head	AntOc	PostOc	Ant Pron	PostPron	Scut	Scap	Ped	Antn3	Antn4	Profem	Protib	Mesofem	Mesotib	Metafem	Metatib	Lb1	Lb2	Lb3	Head	InterOcDi	Ant Pron	Pos Pron	Abd	Profem	Mesofem	Metafem
Z. aithaleos
male	n=1		13.7401	11.1703	2.3939	0.7328	1.2185	0.5792	1.7348	0.9258	6.62266	1.83389	-	-	5.97554	6.5985	4.39935	5.43919	5.78772	6.37686	0.901043	1.50776	0.407381	1.0427	0.3683	1.611	2.5597	1.5545	0.2375	0.2184	0.2337
female	Mean		16.2739	13.6341	2.55858	0.89135	1.09617	0.575333	2.03263	1.1709	6.85506	1.81092	-	-	6.80311	7.00583	4.53399	5.51027	6.6674	7.62513	1.07118	1.60124	0.400496	1.10318	0.563375	1.61967	3.06513	3.93277	0.295933	0.358167	0.278967
	SD		1.65801	0.671429	0.184034	0.0747962	0.233317	0.0668511	0.126261	0.0431169	0.127203	0.0465	-	-	0.152157	0.132197	0.280383	0.0757924	0.338606	0.995574	0.0315297	0.116769	0.0450268	0.0865503	0.070944	0.0872407	0.0308017	0.706695	0.013335	0.0215941	0.0201103
	Range		3.737	1.3843	0.4006	0.1479	0.5309	0.127	0.2323	0.0831	0.25406	0.0657609	-	-	0.303149	0.250145	0.556437	0.13844	0.625446	1.77503	0.068978	0.205833	0.0855402	0.2051	0.1537	0.1701	0.0534	1.3005	0.0261	0.0425	0.0394
	Minimum		13.869	13.0791	2.307	0.8236	0.7747	0.5239	1.8879	1.1227	6.73186	1.77804	-	-	6.65921	6.90548	4.2357	5.45887	6.27971	6.47718	1.03445	1.50001	0.354377	0.9817	0.4597	1.5234	3.0473	3.4423	0.2813	0.3347	0.2616
	Maximum		17.606	14.4634	2.7076	0.9715	1.3056	0.6509	2.1202	1.2058	6.98592	1.8438	-	-	6.96236	7.15562	4.79213	5.59731	6.90516	8.25221	1.10342	1.70584	0.439917	1.1868	0.6134	1.6935	3.1007	4.7428	0.3074	0.3772	0.301
	Count (n)		4	4	4	4	4	3	3	3	3	2	-	-	3	3	3	3	3	3	4	4	4	4	4	3	3	3	3	3	3
Z. amblycephalus
male	Mean		15.7046	14.8697	2.86957	0.790029	1.55086	0.852429	2.03001	1.08376	6.32606	1.80264	6.11105	2.40022	6.21737	6.76742	4.73922	5.24388	6.5705	7.3463	1.19917	1.59841	0.365253	1.31223	0.682543	1.81436	3.76981	2.44629	0.34025	0.328417	0.2922
	SD		0.872677	0.718298	0.162493	0.0717943	0.102601	0.0948889	0.134185	0.322282	0.401322	0.167987	0.426908	0.640383	0.16917	0.415887	0.447712	0.330658	0.470383	0.579062	0.0806163	0.1368	0.0517722	0.074473	0.0631206	0.140163	0.180623	0.4716	0.0147603	0.0170671	0.0185145
	Range		2.5184	1.8129	0.4254	0.2184	0.2158	0.1892	0.4401	0.9341	1.22751	0.402343	1.09377	0	0.455339	1.18859	1.21584	0.976408	1.12569	1.62184	0.241794	0.202915	0.141171	0.2096	0.1695	0.4083	0.5817	0.8185	0.0304	0.0452	0.0494																.
	Minimum		14.8361	14.2577	2.6626	0.6382	1.3786	0.7055	1.8028	0.6477	5.82054	1.54285	5.60899	1.9474	5.9382	6.32978	4.4255	4.76372	6.078	6.83821	1.11917	1.33428	0.269307	1.2426	0.6052	1.7011	3.5103	1.9577	0.3213	0.3022	0.2744
	Maximum		17.4911	16.2115	3.088	0.8566	1.7151	0.9766	2.2429	1.5818	7.04805	1.94519	6.70276	1.9474	6.39354	7.51837	5.64134	5.74013	7.43509	8.46005	1.36096	1.80023	0.410478	1.4592	0.7747	2.1094	4.092	2.7762	0.3517	0.3474	0.3238
	Count (n)		7	7	7	7	7	7	7	7	7	6	5	2	6	6	6	6	6	6	7	7	7	7	7	7	7	7	6	6	6
female	Mean		16.6881	16.316	3.1644	0.883067	1.77797	1.00607	2.1258	1.5081	7.18122	1.91736	6.21738	1.45389	7.31924	7.67476	5.22683	6.11395	7.68511	8.81266	1.30004	1.85182	0.402975	1.2821	0.646867	2.00533	3.9093	3.29405	0.4212	0.38825	0.3234
	SD		2.09558	2.0318	0.36659	0.159647	0.166508	0.125342	0.23921	0.0152735	1.24016	0.229997	1.71636	-	0.897047	0.738998	0.757836	0.715267	0.884533	0.915337	0.171491	0.146552	0.0293403	0.0527329	0.0222028	0.15414	0.338661	0.0704985	0.0336754	0.047164	0.0662967
	Range		2.9636	2.8734	0.7176	0.3105	0.3264	0.2394	0.4407	0.0216	1.75385	0.325264	2.4273	0	1.69043	1.44737	1.07174	1.01154	1.61837	1.83034	0.332887	0.28389	0.0548658	0.1002	0.0432	0.3048	0.6642	0.0997	0.0648	0.0667	0.127
	Minimum		15.2063	14.8793	2.7622	0.7493	1.5957	0.8649	1.8517	1.4973	6.30429	1.75473	5.00373	1.45389	6.30053	7.03748	4.69096	5.60818	6.66968	7.90757	1.15744	1.73092	0.369534	1.2415	0.6223	1.8396	3.5389	3.2442	0.3835	0.3549	0.2489
	Maximum		18.1699	17.7527	3.4798	1.0598	1.9221	1.1043	2.2924	1.5189	8.05814	2.07999	7.43103	1.45389	7.99096	8.48485	5.7627	6.61972	8.28805	9.73791	1.49033	2.01481	0.4244	1.3417	0.6655	2.1444	4.2031	3.3439	0.4483	0.4216	0.3759
	Count (n)		2	2	3	3	3	3	3	2	2	2	2	1	3	3	2	2	3	3	3	3	3	3	3	3	3	2	3	2	3
Z. ambulans
male	Mean		14.2701	12.8466	2.57948	0.84608	1.24168	0.70246	1.76542	1.1214	5.6488	1.69882	5.16999	1.64986	5.39508	5.75258	3.95919	4.73069	4.96936	5.86995	0.648621	1.15071	0.253991	1.1227	0.60896	1.48818	3.41998	2.44828	0.2762	0.25464	0.2451
	SD		0.862486	0.749851	0.202289	0.0763978	0.141696	0.0562709	0.0880849	0.142731	0.772634	0.186894	0.832367	0.197774	0.586076	0.515296	0.335307	0.463689	0.791268	0.632606	0.376371	0.672121	0.154536	0.083859	0.0227105	0.096569	0.223777	0.440109	0.0169111	0.0197101	0.0198479
	Range		2.3031	2.3889	0.475	0.1714	0.3708	0.1429	0.2102	0.3314	2.23965	0.601124	2.50788	0.54268	1.2746	1.15844	0.778934	1.13921	1.91923	1.62805	0.938935	1.61315	0.413706	0.1975	0.0552	0.2477	0.5557	1.1177	0.0413	0.0381	0.0534																.
	Minimum		12.8861	11.5646	2.3444	0.736	1.0808	0.6426	1.6548	0.9627	4.14004	1.45998	3.32258	1.32878	4.73489	5.12896	3.66139	4.03523	3.87068	5.23361	0	0	0	1.044	0.5798	1.3868	3.1108	1.7779	0.2514	0.2394	0.2203
	Maximum		15.1892	13.9535	2.8194	0.9074	1.4516	0.7855	1.865	1.2941	6.37969	2.0611	5.83047	1.87146	6.00949	6.28741	4.44032	5.17443	5.78991	6.86165	0.938935	1.61315	0.413706	1.2415	0.635	1.6345	3.6665	2.8956	0.2927	0.2775	0.2737
	Count (n)		7	9	5	5	5	5	5	5	8	8	8	5	5	5	4	5	5	5	5	5	5	5	5	5	5	5	5	5	5
female	Mean		16.5517	15.7344	2.99642	1.00722	1.49618	0.78714	2.08814	1.37148	4.38585	1.38752	3.59571	0.641477	4.95754	5.30685	4.02188	4.44166	4.78852	5.68646	0.778912	1.41766	0.331906	1.20584	0.67526	1.7742	4.22934	3.05142	0.3921	0.4091	0.30195
	SD		1.21335	1.21621	0.283443	0.138667	0.202828	0.0941506	0.183362	0.129384	2.9318	0.93764	2.44792	0.907185	2.9231	3.11875	2.5064	2.58327	2.83934	3.37309	0.528498	0.960571	0.221681	0.0924864	0.102659	0.168092	0.374012	0.577214	0.0301221	0.0331706	0.0393851
	Range		3.1617	3.1502	0.7048	0.341	0.4971	0.2229	0.4725	0.2914	6.02314	2.06522	5.49408	1.28295	7.56393	8.11283	6.75728	6.61982	7.5137	8.93347	1.15367	2.1192	0.461488	0.2159	0.2444	0.4146	0.9233	1.3588	0.0604	0.0718	0.0933
	Minimum		15.4286	14.6361	2.7667	0.8458	1.2542	0.6693	1.8929	1.2453	0	0	0	0	0	0	0	0	0	0	0	0	0	1.0852	0.5036	1.5101	3.8328	2.6207	0.3587	0.3823	0.2528
	Maximum		18.5903	17.7863	3.4715	1.1868	1.7513	0.8922	2.3654	1.5367	6.02314	2.06522	5.49408	1.28295	7.56393	8.11283	6.75728	6.61982	7.5137	8.93347	1.15367	2.1192	0.461488	1.3011	0.748	1.9247	4.7561	3.9795	0.4191	0.4541	0.3461
	Count (n)		5	5	5	5	5	5	5	4	4	4	4	2	5	5	5	5	5	5	4	4	4	5	5	5	5	5	4	4	4
Z. annulosus
male	n=1		14.572	13.4537	3.0829	0.8306	1.7246	0.7201	1.7571	1.1277	9.20592	2.85583	7.53663	-	8.27656	8.80425	6.42939	7.8001	7.62063	-	1.49488	2.26234	0.549358	1.4466	0.7036	1.7069	3.0911	2.1958	0.2717	0.2635	0.2191
female	Mean		21.9092	20.7179	4.90007	1.68273	2.54423	1.06363	2.51033	1.47347	10.6546	3.40617	8.70165	2.32684	10.4657	10.2302	7.96077	8.98828	9.61951	11.2692	1.89136	2.9441	0.538946	1.70583	0.915433	2.12833	4.18467	2.86007	0.3775	0.3575	0.3205
	SD		0.770749	0.976043	0.103827	0.114373	0.00636108	0.0431451	0.139589	0.230847	0.177641	0.0414826	1.97361	-	0.543039	0.947614	0.211044	0.761259	0.863706	0.762005	0.13866	0.0990971	0.0592031	0.0639841	0.0559308	0.134379	0.224867	0.62405	0.00678823	0.0160309	0.0361202
	Range		1.5322	1.8834	0.2076	0.2006	0.0127	0.0814	0.2629	0.4261	0.251223	0.0586653	2.7911	0	0.767973	1.34013	0.383564	1.49696	1.50089	1.52401	0.269407	0.171718	0.116796	0.1225	0.099	0.2641	0.4458	1.1284	0.0096	0.0311	0.0705
	Minimum		21.1919	19.9244	4.7949	1.5507	2.5381	1.0312	2.406	1.2091	10.529	3.37684	7.3061	2.32684	10.0817	9.56013	7.81984	8.15961	8.62221	10.5072	1.77565	2.82968	0.486166	1.6339	0.8509	1.9819	3.9789	2.1419	0.3727	0.3397	0.2807
	Maximum		22.7241	21.8078	5.0025	1.7513	2.5508	1.1126	2.6689	1.6352	10.7802	3.4355	10.0972	2.32684	10.8497	10.9003	8.20341	9.65657	10.1231	12.0312	2.04505	3.00139	0.602962	1.7564	0.9499	2.246	4.4247	3.2703	0.3823	0.3708	0.3512
	Count (n)		3	3	3	3	3	3	3	3	2	2	2	1	2	2	3	3	3	3	3	3	3	3	3	3	3	3	2	3	3
Z. antiguensis
male	Mean		14.9841	13.6814	2.65685	0.79565	1.3872	0.7985	1.66305	1.1786	5.87848	1.58805	6.31772	1.04951	5.8423	6.32711	4.33161	5.33506	5.66905	6.99509	0.85304	1.54015	0.479923	1.16235	0.5191	1.48905	3.28895	1.805	0.15175	0.28165	0.25115
	SD		1.83466	2.39907	0.271175	0.137391	0.00848528	0.11639	0.220829	0.016122	0.375195	0.193428	-	-	-	-	0.526313	0.402911	0.75712	1.27963	0.0309544	0.028538	0.0595846	0.0983586	0.0282843	0.0692258	0.501551	0.459337	0.214607	0.0345775	0.0184555
	Range		2.5946	3.3928	0.3835	0.1943	0.012	0.1646	0.3123	0.0228	0.530605	0.273549	0	0	0	0	0.744318	0.569802	1.07073	1.80967	0.0437762	0.0403588	0.0842654	0.1391	0.04	0.0979	0.7093	0.6496	0.3035	0.0489	0.0261																.
	Minimum		13.6868	11.985	2.4651	0.6985	1.3812	0.7162	1.5069	1.1672	5.61317	1.45128	6.31772	1.04951	5.8423	6.32711	3.95946	5.05016	5.13369	6.09025	0.831152	1.51997	0.43779	1.0928	0.4991	1.4401	2.9343	1.4802	0	0.2572	0.2381
	Maximum		16.2814	15.3778	2.8486	0.8928	1.3932	0.8808	1.8192	1.19	6.14378	1.72483	6.31772	1.04951	5.8423	6.32711	4.70377	5.61996	6.20442	7.89992	0.874928	1.56033	0.522055	1.2319	0.5391	1.538	3.6436	2.1298	0.3035	0.3061	0.2642
	Count (n)		2	2	2	2	2	2	2	2	2	2	1	1	1	1	2	2	2	2	2	2	2	2	2	2	2	2	2	2	2
female	Mean		16.9139	16.2745	2.97574	0.997575	1.48806	0.81458	1.9789	1.51462	6.69969	2.05731	5.65905	0.890696	6.56833	7.05299	4.50674	5.70694	6.40158	7.86514	0.952252	1.78058	0.439624	1.23278	0.63854	1.68656	4.0131	2.9032	0.39588	0.4012	0.3018
	SD		1.1363	1.11046	0.19233	0.0706954	0.139932	0.0717766	0.22408	0.339512	0.476533	0.227629	0.134938	-	0.376253	0.533938	0.730713	0.597646	0.648016	0.52594	0.114597	0.157156	0.0930054	0.0420635	0.0566393	0.115693	0.626442	0.411437	0.0280876	0.0433476	0.0170941
	Range		2.3793	2.3559	0.4533	0.153	0.3568	0.1817	0.5359	0.8356	0.869641	0.422175	0.262936	0	0.817217	1.23152	1.96162	1.45651	1.38796	1.0861	0.300307	0.339264	0.223422	0.1111	0.1284	0.2725	1.6713	0.8389	0.0793	0.0985	0.0343
	Minimum		15.7734	15.2927	2.8404	0.9106	1.3475	0.7315	1.7856	1.2573	6.1523	1.79704	5.54514	0.890696	6.17356	6.41214	3.35176	4.86685	5.96357	7.33115	0.806074	1.62291	0.310359	1.1735	0.5727	1.5551	3.1141	2.4644	0.3563	0.3505	0.2864
	Maximum		18.1527	17.6486	3.2937	1.0636	1.7043	0.9132	2.3215	2.0929	7.02194	2.21921	5.80807	0.890696	6.99078	7.64366	5.31338	6.32336	7.35153	8.41726	1.10638	1.96217	0.533782	1.2846	0.7011	1.8276	4.7854	3.3033	0.4356	0.449	0.3207
	Count (n)		5	5	5	4	5	5	5	5	3	3	3	1	5	5	5	5	4	4	5	5	5	5	5	5	5	5	5	5	4
Z. armillatus
male	Mean		17.869	16.7245	3.30644	1.11328	1.59272	1.01486	2.31812	1.55096	7.6412	2.57065	6.04075	2.15134	7.03844	7.52203	5.33042	5.96488	7.29799	8.40327	1.35056	1.96495	0.566769	1.40374	0.73755	2.18492	4.48486	3.58758	0.50066	0.46254	0.39738
	SD		0.743637	0.854392	0.130919	0.0680452	0.127768	0.183651	0.180026	0.366467	0.302605	0.0542609	1.18991	0.190713	0.588176	0.741474	0.487968	0.664419	0.873865	1.01953	0.130429	0.101723	0.0957005	0.121675	0.0690794	0.155752	0.264056	0.186571	0.0356114	0.0567109	0.0361363
	Range		1.8688	1.9704	0.3511	0.1505	0.32	0.4998	0.4038	0.7506	0.735887	0.10556	3.30582	0.431197	1.48522	1.94905	1.14574	1.55583	2.15453	2.66979	0.312037	0.245755	0.251132	0.2807	0.153	0.3766	0.6204	0.4064	0.087	0.1429	0.089																.
	Minimum		17.1501	15.5111	3.1509	1.0535	1.4434	0.795	2.0968	1.1367	7.30464	2.51741	4.29337	1.99514	6.39878	6.54306	4.54776	5.07411	5.75724	6.65198	1.16762	1.82554	0.409479	1.2681	0.6852	2.0282	4.1751	3.3566	0.4737	0.4153	0.346
	Maximum		19.0189	17.4815	3.502	1.204	1.7634	1.2948	2.5006	1.8873	8.04053	2.62297	7.59919	2.42633	7.88401	8.49211	5.6935	6.62994	7.91176	9.32177	1.47965	2.0713	0.660611	1.5488	0.8382	2.4048	4.7955	3.763	0.5607	0.5582	0.435
	Count (n)		5	5	5	5	5	5	5	5	4	4	5	4	5	5	5	5	5	5	5	5	5	5	4	5	5	4	5	5	5
female	Mean		21.966	20.8912	4.05716	1.40468	2.01104	1.23166	3.06333	1.56933	8.64002	2.82035	5.79999	2.09847	8.94394	9.31733	6.40666	7.31203	8.49418	9.9762	1.69696	2.24132	0.545421	1.66486	0.946833	2.77319	6.29786	5.64586	0.618875	0.614322	0.477767
	SD		1.58928	1.57782	0.44667	0.166574	0.276698	0.119113	0.281389	0.323959	0.741355	0.27834	1.48777	0.116618	0.656326	0.553361	0.57501	0.489416	0.690926	0.790289	0.153629	0.157528	0.0763412	0.122051	0.0864945	0.348205	0.606812	0.951096	0.0455187	0.111578	0.0468081
	Range		5.7049	5.7182	1.2091	0.435	0.8446	0.3873	0.8579	1.0496	2.70227	0.820507	4.54664	0.164923	2.10682	1.59644	1.50528	1.65085	2.13069	2.23391	0.461167	0.553444	0.273034	0.3771	0.2877	1.0491	1.7914	2.9021	0.1346	0.3105	0.1219
	Minimum		19.0379	17.6473	3.6366	1.2109	1.663	1.0427	2.7165	1.1449	7.51466	2.4502	2.79398	2.01601	8.00368	8.57565	5.50161	6.22203	7.42273	8.64355	1.43248	1.91173	0.399326	1.4447	0.8407	2.2288	5.2946	4.3611	0.5448	0.4153	0.4179
	Maximum		24.7428	23.3655	4.8457	1.6459	2.5076	1.43	3.5744	2.1945	10.2169	3.27071	7.34062	2.18093	10.1105	10.1721	7.00689	7.87288	9.55342	10.8775	1.89364	2.46518	0.67236	1.8218	1.1284	3.2779	7.086	7.2632	0.6794	0.7258	0.5398
	Count (n)		9	9	9	9	9	8	8	8	9	9	9	2	9	9	9	9	9	9	9	9	9	9	9	9	9	9	8	9	9
Z. auralanus
male	Mean		13.6075	13.0701	3.00162	0.9111	1.55762	0.80634	1.84912	1.14022	6.51461	1.79474	6.77389	2.22983	6.41214	6.6005	4.85622	5.74959	6.43916	7.74671	1.02472	1.97849	0.452327	1.14236	0.55064	1.5974	3.2417	2.033	0.23812	0.24754	0.23302
	SD		0.696213	0.674305	0.184285	0.114807	0.103135	0.0910067	0.148588	0.224475	0.774262	0.127164	1.32661	-	0.357697	0.53622	0.307234	0.372526	0.506928	0.427665	0.0787752	0.180568	0.0559166	0.0779059	0.0708437	0.0932836	0.331958	0.238888	0.0214227	0.0226978	0.0156864
	Range		1.7062	1.5621	0.4394	0.2845	0.2712	0.2362	0.4013	0.5435	1.80441	0.229879	2.38641	0	0.901619	1.1168	0.720677	0.915146	1.1358	1.1608	0.186526	0.474584	0.133346	0.1937	0.1911	0.2451	0.8604	0.5976	0.0546	0.0501	0.0374															.
	Minimum		12.667	11.9736	2.6784	0.7245	1.4528	0.6763	1.6326	0.9843	5.45608	1.6484	5.24594	2.22983	5.86998	5.98984	4.35915	5.11334	5.87512	7.04304	0.93263	1.73792	0.380581	1.0579	0.4426	1.4656	2.8925	1.7919	0.2204	0.2255	0.214
	Maximum		14.3732	13.5357	3.1178	1.009	1.724	0.9125	2.0339	1.5278	7.26049	1.87827	7.63235	2.22983	6.7716	7.10664	5.07983	6.02849	7.01091	8.20384	1.11916	2.2125	0.513927	1.2516	0.6337	1.7107	3.7529	2.3895	0.275	0.2756	0.2514
	Count (n)		5	5	5	5	5	5	5	5	4	3	3	1	5	5	5	5	5	5	5	5	5	5	5	5	5	5	5	5	5
female	Mean		17.8456	17.3918	3.5236	1.01493	1.9378	0.8563	2.5159	1.60083	8.00287	2.05672	7.22432	-	-	-	5.74576	7.02332	7.82143	9.58782	1.24008	2.51226	0.64916	1.3128	0.664633	1.81903	4.6048	3.29777	-	0.3829	0.30705
	SD		0.568707	0.440958	0.198822	0.120593	0.150922	0.0668923	0.195739	0.193084	0.143272	-	-	-	-	-	0.423982	0.266296	0.112129	0.217064	0.0404989	0.0407501	0.016562	0.052238	0.0524061	0.322551	0.144136	0.8647	-	0.016122	0.00940452
	Range		1.1043	0.8808	0.3689	0.235	0.2909	0.0946	0.3644	0.3797	0.202618	0	0	0	0	0	0.5996	0.3766	0.158574	0.306975	0.0764077	0.0814756	0.032901	0.0946	0.1016	0.5829	0.2635	1.7278	0	0.0228	0.0133
	Minimum		17.2148	16.9386	3.382	0.9131	1.7691	0.809	2.2924	1.4313	7.90156	2.05672	7.22432	0	0	0	5.44596	6.83502	7.74214	9.43433	1.20964	2.47095	0.631602	1.2783	0.6064	1.4478	4.4393	2.4124	0	0.3715	0.3004
	Maximum		18.3191	17.8194	3.7509	1.1481	2.06	0.9036	2.6568	1.811	8.10418	2.05672	7.22432	0	0	0	6.04556	7.21162	7.90071	9.7413	1.28605	2.55242	0.664503	1.3729	0.708	2.0307	4.7028	4.1402	0	0.3943	0.3137
	Count (n)		3	3	3	3	3	2	3	3	2	1	1	0	0	0	2	2	2	2	3	3	3	3	3	3	3	3	0	2	2
Z. bahiaensis
male	Mean		12.3501	9.083	2.4047	0.7766	1.1391	0.7519	1.4732	0.7861	5.97172	1.52653	-	-	5.83245	6.59245	4.09316	5.26677	-	-	0.840419	1.48543	0.465507	1.0611	0.5416	1.2484	2.3139	1.6332	0.2331	0.2299	-
Z. banksi
male	Mean		11.9967	10.5182	2.50188	0.8047	1.31525	0.72024	1.48018	0.76535	6.12229	1.65087	7.03641	1.45979	5.70037	6.11685	4.15696	5.09632	5.67795	6.65786	0.82122	1.70752	0.426763	1.11314	0.47572	1.32854	2.48058	1.57335	0.226825	0.2105	0.201775
	SD		0.711572	0.700353	0.128558	0.0434938	0.0469688	0.106164	0.069788	0.104073	0.386277	0.0908459	0.121106	-	0.195336	0.251713	0.394948	0.417802	0.522242	0.727162	0.051847	0.0501468	0.0417267	0.074271	0.0633056	0.066401	0.29199	0.311702	0.0510422	0.023773	0.0201665
	Range		1.8161	1.6567	0.3264	0.1023	0.1079	0.2159	0.1639	0.2248	0.883069	0.17414	0.17127	0	0.449243	0.560793	0.83178	0.980443	1.20838	1.67117	0.125103	0.124127	0.0926973	0.186	0.1695	0.1822	0.7492	0.6922	0.1225	0.0577	0.0451																.
	Minimum		10.8071	10.0889	2.3012	0.7499	1.251	0.616	1.3957	0.6179	5.57997	1.54884	6.95077	1.45979	5.42428	5.88169	3.90436	4.69176	5.01191	6.03498	0.732144	1.66941	0.39308	1.0452	0.381	1.2497	2.053	1.1163	0.174	0.1791	0.1721
	Maximum		12.6232	11.7456	2.6276	0.8522	1.3589	0.8319	1.5596	0.8427	6.46304	1.72298	7.12204	1.45979	5.87352	6.44248	4.73614	5.6722	6.2203	7.70615	0.857246	1.79354	0.485778	1.2312	0.5505	1.4319	2.8022	1.8085	0.2965	0.2368	0.2172
	Count (n)		5	5	5	4	4	5	5	4	4	3	2	1	4	4	4	4	4	4	5	5	4	5	5	5	5	4	4	4	4
Z. casii
male	n=1		13.35	12.55	2.77	0.85	1.38	0.72	1.39	1.05	5.31	1.28	4.35	1.53	5.13	5.33	3.43	4.35	5.01	5.91	0.87	1.66	0.32	0.88	0.55	1.32	2.12	2.26	0.28	0.31	0.24
Z. cervicalis
male	Mean		11.7785	11.1358	2.45547	0.76885	1.33496	0.69717	1.21851	0.85248	4.69969	1.23507	4.79187	1.79974	4.66117	5.09863	3.10371	3.7571	4.38939	5.34405	0.830217	1.45143	0.313327	0.869	0.52978	1.13289	1.71144	1.63853	0.2787	0.26303	0.21126
	SD		0.865492	0.846817	0.191054	0.0629612	0.140744	0.079624	0.159947	0.13915	0.547638	0.0769875	0.60792	0.153616	0.428471	0.434202	0.401436	0.671094	0.449963	0.447302	0.113897	0.175182	0.0518892	0.0716651	0.060334	0.106048	0.197514	0.301762	0.0372433	0.0241668	0.0791774
	Range		3.2607	2.7407	0.4965	0.1689	0.421	0.2515	0.4699	0.4336	1.77197	0.2202	1.53467	0.406496	1.37636	1.34217	1.18309	2.40307	1.36736	1.44125	0.338092	0.558265	0.13803	0.207	0.1925	0.3149	0.5297	0.856	0.1296	0.0648	0.2819																.
	Minimum		9.8146	9.5288	2.1927	0.701	1.1062	0.581	0.9652	0.663	3.63116	1.10572	3.90782	1.69036	3.8357	4.29391	2.31303	1.9978	3.53206	4.70509	0.604468	1.20966	0.242917	0.7684	0.4292	0.983	1.4725	1.1239	0.2343	0.2305	0
	Maximum		13.0753	12.2695	2.6892	0.8699	1.5272	0.8325	1.4351	1.0966	5.40314	1.32592	5.44249	2.09686	5.21206	5.63607	3.49612	4.40087	4.89941	6.14634	0.94256	1.76792	0.380946	0.9754	0.6217	1.2979	2.0022	1.9799	0.3639	0.2953	0.2819
	Count (n)		13	13	10	10	10	10	10	10	13	9	10	6	10	10	10	10	8	8	9	9	8	10	10	10	10	10	10	10	10
female	Mean		14.2537	13.8914	2.85794	0.94137	1.54786	0.81027	1.56388	1.10906	5.51932	1.41589	4.67827	1.60649	5.46134	5.93158	3.80167	4.66231	5.31336	6.32051	0.984652	1.79488	0.36025	0.96018	0.61301	1.38842	2.20382	2.3403	0.32651	0.353756	0.263311
	SD		0.717267	0.801713	0.177493	0.124042	0.0791228	0.0902346	0.0943137	0.117763	0.609355	0.129365	0.700248	0.446645	0.773412	0.726223	0.320193	0.367849	0.598064	0.541762	0.0817907	0.11448	0.0725764	0.056325	0.0456635	0.128685	0.182385	0.385496	0.0354378	0.0285281	0.0190677
	Range		2.3711	2.359	0.5106	0.3759	0.2674	0.2483	0.3277	0.381	1.99782	0.339578	1.78516	1.27501	2.51297	2.35954	0.88813	0.889505	1.53271	1.41061	0.199017	0.329163	0.219495	0.186	0.1435	0.4477	0.5772	1.1894	0.1193	0.0871	0.0673
	Minimum		12.8854	12.707	2.6352	0.7506	1.4268	0.6623	1.3824	0.9353	4.35816	1.2544	3.86881	0.783096	3.62526	4.36602	3.31269	4.2246	4.50901	5.71018	0.877701	1.59114	0.223573	0.8274	0.5315	1.1487	1.9234	1.7253	0.2896	0.3041	0.2242
	Maximum		15.2565	15.066	3.1458	1.1265	1.6942	0.9106	1.7101	1.3163	6.35599	1.59398	5.65397	2.05811	6.13823	6.72556	4.20082	5.11411	6.04173	7.1208	1.07672	1.92031	0.443068	1.0134	0.675	1.5964	2.5006	2.9147	0.4089	0.3912	0.2915
	Count (n)		10	10	10	10	10	10	10	9	10	9	7	6	10	10	9	9	9	9	10	10	10	10	10	10	10	10	10	9	9
Z. chamaeleon
male	Mean		13.4476	11.7568	2.20268	0.68174	1.06276	0.53658	1.75426	1.03708	4.37894	1.15298	5.52429	-	4.66686	4.898	3.47254	4.3123	4.41347	5.65795	0.806764	1.3068	0.318112	1.14058	0.55256	1.46646	3.2287	2.31986	0.258	0.26255	0.2375
	SD		0.627949	0.550743	0.0957991	0.0579164	0.0775276	0.101948	0.127205	0.159964	0.228013	0.0893374	1.00791	-	0.200501	0.198973	0.0284815	0.0495676	0.214505	0.282588	0.0796357	0.0791708	0.0880614	0.0256535	0.0519714	0.0944967	0.29773	0.344128	0.0152227	0.00318198	0.0013
	Range		1.5659	1.5164	0.2146	0.1524	0.179	0.2642	0.325	0.4178	0.450448	0.162585	1.97226	-	0.400957	0.396194	0.0402789	0.0700992	0.425536	0.563102	0.181515	0.177747	0.193357	0.0724	0.115	0.2546	0.7778	0.8376	0.0298	0.0045	0.0026																.
	Minimum		12.4955	10.9753	2.1095	0.6179	0.9621	0.428	1.5863	0.8928	4.17425	1.0503	4.65848	-	4.46813	4.68913	3.4524	4.27725	4.21643	5.39037	0.691911	1.23796	0.248495	1.103	0.4933	1.3691	2.7585	2.0808	0.2413	0.2603	0.2362
	Maximum		14.0614	12.4917	2.3241	0.7703	1.1411	0.6922	1.9113	1.3106	4.6247	1.21289	6.63074	-	4.86908	5.08533	3.49268	4.34735	4.64197	5.95347	0.873426	1.4157	0.441851	1.1754	0.6083	1.6237	3.5363	2.9184	0.2711	0.2648	0.2388
	Count (n)		5	5	5	5	5	5	5	5	3	3	3	-	3	3	2	2	3	3	4	4	4	5	5	5	5	5	3	2	3
male	Mean		14.3878	13.6854	2.37464	0.71604	1.18604	0.57838	1.97318	1.09222	4.5703	1.20245	3.82708	1.6574	4.70477	4.42308	3.67425	4.64867	4.4837	6.17095	1.05951	1.47775	0.413738	1.18706	0.65698	1.6998	3.80132	3.4079	0.315125	0.360675	0.2878
	SD		0.652784	0.588331	0.127487	0.125349	0.0813524	0.100682	0.142584	0.265558	0.374929	0.0489132	0.00206767	-	0.29832	0.98993	0.372945	0.201098	0.246896	0.174836	0.0775624	0.0936127	0.0564869	0.0187516	0.0268832	0.0446165	0.295489	0.257918	0.0202302	0.0245815	0.0230807
	Range		1.5729	1.3869	0.3067	0.3086	0.1988	0.2522	0.2914	0.5778	0.721174	0.0691737	0.00292413	-	0.682102	2.34121	0.770832	0.435306	0.542467	0.38356	0.210593	0.222696	0.12896	0.0439	0.0641	0.1016	0.6858	0.6019	0.0488	0.054	0.0546
	Minimum		13.4468	12.6409	2.213	0.5036	1.0668	0.461	1.8383	0.8446	4.18093	1.16787	3.82562	1.6574	4.37067	3.04103	3.29723	4.35009	4.19246	5.92529	0.971724	1.38393	0.36414	1.1607	0.6096	1.6523	3.4391	3.1522	0.2928	0.3372	0.2648
	Maximum		15.0197	14.0278	2.5197	0.8122	1.2656	0.7132	2.1297	1.4224	4.90211	1.23704	3.82854	1.6574	5.05278	5.38224	4.06806	4.78539	4.73493	6.30885	1.18232	1.60663	0.4931	1.2046	0.6737	1.7539	4.1249	3.7541	0.3416	0.3912	0.3194
	Count (n)		5	5	5	5	5	5	5	5	4	2	2	1	4	4	4	4	4	4	5	5	5	5	5	5	5	5	4	4	4
Z. championi
male	Mean		15.3268	11.786	2.61264	0.86856	1.23608	0.71564	1.93778	1.1962	5.69106	2.18442	5.8959	1.64289	5.7702	6.31403	4.28292	5.6	5.56532	7.36471	1.0847	1.5625	0.427976	1.24916	0.58646	1.81634	3.14162	2.97014	0.31242	0.32372	0.3459
	SD		0.697642	0.527521	0.0896714	0.032004	0.0552231	0.103914	0.180086	0.263789	0.157301	1.80774	0.694394	0.0586979	0.267368	0.215897	0.163265	0.0851322	0.313732	0.323593	0.116375	0.0430885	0.0924889	0.0377312	0.0597374	0.0724593	0.0731783	0.231914	0.0240604	0.0202065	0.0163526
	Range		1.9622	1.4363	0.2463	0.0793	0.1359	0.2711	0.4889	0.6387	0.390062	4.48915	1.88267	0.132394	0.644541	0.481514	0.420171	0.230071	0.765502	0.733558	0.306505	0.107176	0.218107	0.1041	0.1296	0.2039	0.1867	0.6463	0.054	0.0514	0.0329																.
	Minimum		14.2151	10.849	2.5013	0.8338	1.1849	0.5855	1.6612	1.0192	5.48344	1.38436	4.99783	1.58227	5.33214	6.07772	4.00224	5.49736	5.18809	6.89283	0.923307	1.49379	0.31619	1.204	0.5111	1.7157	3.034	2.6709	0.287	0.2997	0.3315
	Maximum		16.1773	12.2853	2.7476	0.9131	1.3208	0.8566	2.1501	1.6579	5.8735	5.8735	6.88049	1.71467	5.97668	6.55924	4.42242	5.72743	5.95359	7.62639	1.22981	1.60097	0.534297	1.3081	0.6407	1.9196	3.2207	3.3172	0.341	0.3511	0.3644
	Count (n)		6	6	5	5	5	5	5	5	6	6	5	5	5	5	5	5	4	4	5	5	5	5	5	5	5	5	5	5	4
Z. conjungens
male	Mean		18.3442	17.3483	3.4644	1.15403	1.78347	1.11054	2.4919	1.3797	7.05582	2.41729	5.73189	1.76187	7.2791	7.50998	5.41598	6.05181	6.79506	7.83982	1.40119	1.93065	0.588383	1.51464	0.855175	2.46104	5.20279	3.71791	0.530414	0.530671	0.454657
	SD		1.0429	1.25258	0.166317	0.133966	0.0757083	0.110347	0.167866	0.186758	0.851769	0.238522	0.889403	0.583024	0.516066	0.658725	0.414259	0.534886	0.519603	0.765441	0.0924739	0.229128	0.0876277	0.102211	0.0604154	0.19252	0.527668	0.393643	0.043133	0.0388662	0.0602439
	Range		3.1611	3.7598	0.541	0.447	0.1962	0.3143	0.588	0.5182	2.3724	0.707356	3.16266	1.24367	1.50437	1.57957	0.951974	1.4473	1.30616	2.28976	0.288406	0.649773	0.253676	0.3231	0.1803	0.482	1.6776	1.2464	0.1168	0.1068	0.1651																.
	Minimum		16.6414	15.0705	3.2163	0.9887	1.6802	0.9157	2.2079	1.0693	5.82256	2.06764	4.25979	0.914331	6.41025	6.78996	5.01743	5.2925	6.12117	6.76517	1.21788	1.59108	0.415276	1.3729	0.7372	2.2098	4.2958	3.062	0.4712	0.4724	0.3835
	Maximum		19.8025	18.8303	3.7573	1.4357	1.8764	1.23	2.7959	1.5875	8.19497	2.77499	7.42246	2.158	7.91462	8.36954	5.96941	6.7398	7.42733	9.05492	1.50628	2.24086	0.668952	1.696	0.9175	2.6918	5.9734	4.3084	0.588	0.5792	0.5486
	Count (n)		11	11	8	8	8	8	8	8	9	9	9	4	7	7	7	7	7	6	8	8	8	8	8	8	8	8	7	7	7
male	Mean		21.6819	21.2487	3.86132	1.32037	1.9851	1.23912	2.98638	1.47438	7.68043	2.42044	5.88747	2.03551	8.00957	8.33493	5.85188	6.82201	7.7257	8.74735	1.63041	2.28632	0.718321	1.66568	0.99236	2.87398	6.55077	5.7964	0.68006	0.7479	0.50572
	SD		0.686795	0.624216	0.287126	0.107332	0.215427	0.101112	0.235445	0.142085	0.47603	0.184034	0.356234	0.244606	0.533608	0.610511	0.554634	0.383858	0.519268	0.298738	0.112836	0.109639	0.0776715	0.06346	0.0620307	0.0966413	0.356388	0.551968	0.0447777	0.142868	0.0213719
	Range		1.9006	1.6161	0.8731	0.2768	0.5994	0.2692	0.5797	0.3809	1.27779	0.43092	0.627867	0.473587	1.33674	1.47992	1.43786	0.960284	1.36059	0.693018	0.327726	0.284152	0.20908	0.1435	0.1517	0.2585	1.1043	1.4167	0.1124	0.388	0.0565
	Minimum		20.7429	20.4019	3.4468	1.1424	1.7545	1.1348	2.6816	1.2637	7.00258	2.30627	5.47633	1.83413	7.54957	7.78288	5.16424	6.52762	6.97942	8.32061	1.52277	2.196	0.616582	1.6033	0.9138	2.7978	6.0509	4.8311	0.621	0.5188	0.4794
	Maximum		22.6435	22.018	4.3199	1.4192	2.3539	1.404	3.2613	1.6446	8.28037	2.73719	6.1042	2.30771	8.88632	9.2628	6.6021	7.4879	8.34002	9.01363	1.85049	2.48015	0.825661	1.7468	1.0655	3.0563	7.1552	6.2478	0.7334	0.9068	0.5359
	Count (n)		6	6	6	6	6	6	6	6	5	5	3	3	5	5	5	5	5	5	6	6	6	6	5	6	6	6	5	5	5
Z. cordazulus
male	Mean		14.9361	12.0187	2.72955	0.86515	1.3967	0.68615	2.01005	0.90135	6.14201	1.46632	6.28642	-	5.76464	6.00921	4.24147	4.7992	6.18914	7.2336	0.926836	1.63609	0.283471	1.2259	0.58195	1.491	3.5185	2.2841	0.2095	0.23145	0.2496
	SD		0.190848	1.06511	0.108258	0.145028	0.0722663	0.0839336	0.032739	0.122542	0.104854	-	-	-	-	-	0.714067	-	-	-	-	-	-	0.0417193	0.04179	0.02786	0.141846	0.033234	-	0.00586899	-
	Range		0.2699	1.5063	0.1531	0.2051	0.1022	0.1187	0.0463	0.1733	0.148286	-	-	-	-	0	1.00984	1.12551	-	-	-	-	-	0.059	0.0591	0.0394	0.2006	0.047	-	0.0083	-																.
	Minimum		14.8012	11.2655	2.653	0.7626	1.3456	0.6268	1.9869	0.8147	6.06787	1.46632	6.28642	-	5.76464	6.00921	3.73655	4.23645	6.18914	7.2336	0.926836	1.63609	0.283471	1.1964	0.5524	1.4713	3.4182	2.2606	0.2095	0.2273	0.2496
	Maximum		15.0711	12.7718	2.8061	0.9677	1.4478	0.7455	2.0332	0.988	6.21615	1.46632	6.28642	-	5.76464	6.00921	4.7464	5.36196	6.18914	7.2336	0.926836	1.63609	0.283471	1.2554	0.6115	1.5107	3.6188	2.3076	0.2095	0.2356	0.2496
	Count (n)		2	2	2	2	2	2	2	2	2	1	1	-	1	1	2	2	1	1	1	1	1	2	2	2	2	2	1	2	1
female	Mean		16.8161	15.0571	2.92753	0.850775	1.54705	0.71245	2.40935	1.07062	6.35343	1.58801	6.07385	1.88967	5.99614	6.32228	4.72022	5.52837	6.46271	7.07859	1.02337	2.01462	0.347296	1.30323	0.6128	1.72735	4.43165	2.85775	0.2459	0.33115	0.24305
	SD		1.16552	1.11185	0.138243	0.0331214	0.125303	0.0042595	0.219718	0.135411	0.410742	0.0387083	-	-	0.564953	0.60858	0.284234	0.575729	0.406207	0.671269	0.143374	0.137783	0.122517	0.0412498	0.0253142	0.132015	0.327597	0.215617	0.0207651	0.0356713	0.0212748
	Range		2.6473	2.5972	0.2978	0.0629	0.2921	0.0102	0.5047	0.289	0.749093	0.0547418	-	-	1.10038	1.21071	0.60167	1.39182	0.809316	1.56943	0.341111	0.286283	0.218117	0.0794	0.0494	0.315	0.7722	0.4604	0.0387	0.0845	0.0476
	Minimum		15.5562	13.8195	2.8334	0.8217	1.4326	0.7067	2.1381	0.9417	6.07622	1.56064	6.07385	1.88967	5.52003	5.6808	4.53595	4.83871	6.07851	6.32591	0.830424	1.89678	0.270469	1.27	0.5849	1.5862	4.116	2.6993	0.2222	0.2952	0.2121
	Maximum		18.2035	16.4167	3.1312	0.8846	1.7247	0.7169	2.6428	1.2307	6.82532	1.61538	6.07385	1.88967	6.62041	6.89151	5.13762	6.23053	6.88783	7.89534	1.17153	2.18306	0.488586	1.3494	0.6343	1.9012	4.8882	3.1597	0.2609	0.3797	0.2597
	Count (n)		4	4	4	4	4	4	4	4	3	2	1	1	3	3	4	4	3	4	4	4	3	3	3	4	4	4	3	4	4
Z. errans
male	Mean		14.103	11.0289	2.54613	0.73355	1.24905	0.73025	1.40728	0.972067	6.64148	1.64022	7.90845	1.58528	6.32959	6.99716	4.80896	5.67132	6.33566	7.64413	1.00391	1.57368	0.399064	1.1172	0.565533	1.41162	2.48338	1.81307	0.232217	0.234717	0.240967
	SD		1.15286	0.932254	0.122556	0.0426018	0.172346	0.0892839	0.192399	0.128434	0.714615	0.186618	1.13991	0.550291	0.766139	0.514992	0.464396	0.718372	0.432318	0.232186	0.03292	0.147506	0.0879064	0.0492109	0.0558612	0.0946027	0.174862	0.232631	0.0215047	0.0248328	0.0100899
	Range		2.8079	2.6423	0.322	0.1124	0.496	0.2425	0.5239	0.3511	2.11663	0.530644	2.6024	0.778229	2.37976	1.55502	1.30137	2.18057	1.1973	0.492141	0.0798247	0.384587	0.213771	0.1321	0.1416	0.2489	0.4465	0.6325	0.0604	0.0661	0.028																.
	Minimum		12.7648	9.5345	2.3285	0.682	0.9493	0.6369	1.2497	0.8312	5.83244	1.44599	6.3046	1.19617	5.21699	6.3556	4.37921	4.41917	5.91986	7.40292	0.954362	1.34698	0.289252	1.0821	0.508	1.3386	2.3069	1.4967	0.2044	0.1898	0.2317
	Maximum		15.5727	12.1768	2.6505	0.7944	1.4453	0.8794	1.7736	1.1823	7.94907	1.97663	8.90701	1.9744	7.59675	7.91061	5.68058	6.59974	7.11715	7.89506	1.03419	1.73157	0.503022	1.2142	0.6496	1.5875	2.7534	2.1292	0.2648	0.2559	0.2597
	Count (n)		6	6	6	6	6	6	6	6	6	6	4	2	6	6	6	6	6	5	6	6	6	6	6	6	6	6	6	6	6
female	Mean		18.9682	15.1003	2.9067	0.838825	1.4919	0.860925	1.9509	1.43077	7.79263	1.96588	7.61008	2.0661	7.7361	8.49543	5.11622	6.36442	7.72867	9.37694	1.26927	1.83251	0.454307	1.26717	0.582925	1.75672	3.352	3.36108	0.327475	0.378925	0.334033
	SD		0.83169	0.780961	0.102821	0.038946	0.0954711	0.0635818	0.125885	0.174716	0.554932	0.135536	0.346737	-	0.196538	0.644365	1.10012	1.06173	0.400248	0.803341	0.0607957	0.121168	0.105207	0.0314581	0.022103	0.160599	0.0601672	0.325901	0.0105266	0.0413987	0.0249031
	Range		1.886	1.5119	0.2343	0.0832	0.2222	0.1384	0.2991	0.3531	1.28476	0.267605	0.683808	-	0.392599	1.4258	2.38954	2.27862	0.794221	1.60347	0.118831	0.258807	0.24293	0.0749	0.0489	0.2947	0.1207	0.7399	0.0229	0.0959	0.0457
	Minimum		18.2975	14.3999	2.7648	0.7874	1.357	0.7665	1.778	1.2369	7.2357	1.81961	7.23487	2.0661	7.54539	7.9942	3.93609	5.32795	7.36043	8.54588	1.2048	1.71574	0.32163	1.2332	0.5645	1.6059	3.2861	3.0543	0.313	0.3194	0.3169
	Maximum		20.1835	15.9118	2.9991	0.8706	1.5792	0.9049	2.0771	1.59	8.52046	2.08721	7.91867	2.0661	7.93799	9.42	6.32563	7.60656	8.15466	10.1493	1.32363	1.97454	0.56456	1.3081	0.6134	1.9006	3.4068	3.7942	0.3359	0.4153	0.3626
	Count (n)		4	4	4	4	4	4	4	4	4	3	3	1	3	4	4	4	3	3	4	4	4	4	4	4	4	4	4	4	3
Z. erythrocephalus
male	Mean		12.4926	11.3608	2.64582	0.873275	1.28832	0.669275	1.53898	0.7855	6.72769	1.72058	7.18287	1.39153	6.13385	6.46684	4.45548	5.56917	6.00339	7.02308	0.906782	1.80849	0.359506	1.15378	0.568625	1.34338	2.31088	1.7433	0.20128	0.226075	0.21372
	SD		0.26308	0.315836	0.103138	0.011406	0.0671082	0.0115523	0.128587	0.187857	0.283026	0.0417774	0.317275	0.212706	0.269899	0.215027	0.065474	0.273021	0.142828	0.314066	0.031392	0.0405084	0.0293661	0.0286708	0.0289389	0.0814561	0.142294	0.140384	0.032201	0.00999079	0.0213929
	Range		0.6972	0.8147	0.2464	0.0279	0.1618	0.0223	0.32	0.4477	0.657785	0.0978645	0.771058	0.494619	0.690224	0.574274	0.13685	0.629669	0.360037	0.841149	0.0801962	0.099722	0.062564	0.0692	0.0636	0.2178	0.3708	0.3563	0.0869	0.0228	0.052																.
	Minimum		12.0726	10.9385	2.5197	0.8598	1.1977	0.6591	1.3291	0.5391	6.31903	1.68585	6.8277	1.15651	5.68117	6.11433	4.39096	5.25773	5.79909	6.62319	0.854046	1.77835	0.325329	1.1233	0.5473	1.2357	2.1012	1.4998	0.1664	0.2121	0.1918
	Maximum		12.7698	11.7532	2.7661	0.8877	1.3595	0.6814	1.6491	0.9868	6.97682	1.78371	7.59875	1.65113	6.3714	6.68861	4.52781	5.8874	6.15913	7.46434	0.934242	1.87807	0.387893	1.1925	0.6109	1.4535	2.472	1.8561	0.2533	0.2349	0.2438
	Count (n)		5	5	5	4	5	4	5	5	5	5	5	4	5	5	4	4	5	5	5	5	5	5	4	5	5	5	5	4	5
female	Mean		17.9241	16.2947	3.31494	1.02782	1.70854	0.76912	2.21146	0.98512	8.28961	2.11602	7.3321	1.93705	7.56109	8.14601	5.65148	7.07251	7.5607	9.49944	1.12329	2.25662	0.487066	1.35168	0.66866	1.84186	3.80198	3.02654	0.29272	0.37098	0.3132
	SD		0.992752	0.904181	0.0814044	0.0364545	0.0780392	0.0816435	0.0948375	0.205302	0.503049	0.126648	0.447381	0.652416	0.35109	0.413723	0.332384	0.403193	0.56306	0.675611	0.059814	0.0876852	0.0978491	0.0420918	0.0653751	0.0887221	0.488477	0.173237	0.0180978	0.0233405	0.0209919
	Range		2.2117	2.0028	0.1797	0.0908	0.2178	0.2293	0.2388	0.5207	1.34472	0.324185	1.09898	1.30306	0.854406	1.04982	0.831701	0.968557	1.18458	1.78648	0.158194	0.209304	0.23867	0.0978	0.1607	0.2115	1.0814	0.4229	0.047	0.0635	0.0482
	Minimum		16.8472	15.3835	3.2334	0.9754	1.6015	0.6547	2.0847	0.7264	7.6437	1.97597	6.75402	1.2659	7.04764	7.65292	5.35008	6.71782	7.01683	8.80557	1.02314	2.17307	0.362583	1.3075	0.6096	1.7094	3.2607	2.9102	0.2686	0.3372	0.282
	Maximum		19.0589	17.3863	3.4131	1.0662	1.8193	0.884	2.3235	1.2471	8.98842	2.30015	7.853	2.56896	7.90204	8.70274	6.18178	7.68638	8.20141	10.592	1.18133	2.38237	0.601253	1.4053	0.7703	1.9209	4.3421	3.3331	0.3156	0.4007	0.3302
	Count (n)		5	5	5	5	5	5	5	5	5	5	5	3	5	5	5	5	5	5	5	5	5	5	5	5	5	5	5	5	5
Z. exsanguis
male	Mean		14.922	13.7816	2.67588	0.82676	1.35606	0.78956	1.7126	1.26048	6.12128	1.89429	6.02775	2.27665	5.98166	6.7035	4.2817	5.40452	5.97667	7.02856	0.950518	1.70637	0.427671	1.16066	0.58828	1.50036	3.27508	2.0018	0.29815	0.3156	0.286167
	SD		1.3563	1.1194	0.238459	0.129323	0.147557	0.0754913	0.224668	0.299728	0.816303	0.240362	0.808901	-	0.727942	0.763049	0.520769	0.622635	0.683284	0.834085	0.0919432	0.14892	0.0247487	0.0716429	0.0347972	0.102908	0.234303	0.314795	0.0365474	0.0445475	0.0263792
	Range		2.6175	2.5349	0.501	0.3067	0.3867	0.1614	0.5638	0.7798	1.9518	0.339923	1.14396	-	1.57081	1.76335	0.96528	1.10679	1.19581	1.49182	0.198307	0.355694	0.0552271	0.1505	0.0933	0.2515	0.5842	0.6287	0.0767	0.0832	0.0527																.
	Minimum		13.7922	12.4689	2.4384	0.6877	1.1696	0.7035	1.4377	0.9481	5.29586	1.72433	5.45577	2.27665	5.34495	5.99326	3.91199	5.01587	5.18781	6.49815	0.858865	1.51589	0.391392	1.0979	0.5328	1.3868	2.9223	1.658	0.2687	0.2832	0.2591
	Maximum		16.4097	15.0038	2.9394	0.9944	1.5563	0.8649	2.0015	1.7279	7.24767	2.06425	6.59973	2.27665	6.91576	7.75661	4.87727	6.12266	6.38362	7.98997	1.05717	1.87159	0.446619	1.2484	0.6261	1.6383	3.5065	2.2867	0.3454	0.3664	0.3118
	Count (n)		5	5	5	5	5	5	5	5	4	2	2	1	4	4	3	3	3	3	4	4	4	5	5	5	5	5	4	3	3
female	Mean		17.0045	16.1009	2.999	0.97168	1.46053	1.03518	1.87302	1.48222	6.90414	2.01573	5.81794	1.49657	6.8979	7.77577	5.19493	6.41295	7.06054	8.59559	1.10209	1.87458	0.473841	1.24396	0.6793	1.75642	3.96848	3.09764	0.387075	0.40145	0.340133
	SD		1.7885	2.08733	0.27058	0.141267	0.0716302	0.119777	0.342339	0.234291	0.736365	0.422338	0.29766	0.086306	0.732214	0.867062	0.54743	0.624504	1.08892	1.03203	0.195207	0.230883	0.105954	0.134702	0.0998363	0.130992	0.76272	0.381665	0.057193	0.0658304	0.0593638
	Range		4.2336	5.6972	0.7436	0.3543	0.16	0.2457	0.7995	0.5835	1.42609	0.802618	0.587533	0.122055	1.65284	1.7418	1.16892	1.2597	2.0336	1.97956	0.421708	0.497526	0.245416	0.3227	0.2115	0.2749	1.9153	0.8046	0.1264	0.1588	0.1117
	Minimum		15.1244	13.0416	2.681	0.8541	1.4002	0.8947	1.5913	1.2326	6.29724	1.69041	5.49647	1.43555	6.06327	6.96083	4.73524	5.88437	6.26874	7.77454	0.890049	1.53816	0.362332	1.1315	0.5829	1.6123	3.2454	2.773	0.3448	0.32	0.2959
	Maximum		19.358	18.7388	3.4246	1.2084	1.5602	1.1404	2.3908	1.8161	7.72333	2.49303	6.084	1.5576	7.71611	8.70263	5.90416	7.14407	8.30234	9.7541	1.31176	2.03569	0.607749	1.4542	0.7944	1.8872	5.1607	3.5776	0.4712	0.4788	0.4076
	Count (n)		5	5	5	5	4	4	5	5	3	3	3	2	4	4	4	4	3	3	4	4	4	5	5	4	5	5	4	4	3
Z. fasciatus
female	Mean		15.2496	14.1774	3.13916	1.01434	1.57262	0.7454	1.99464	0.920775	6.70033	1.94552	7.12536	2.255	6.76268	7.25094	4.95146	5.98572	6.32558	7.34811	1.06836	2.11539	0.338171	1.27763	0.6252	1.6821	3.59282	2.89066	0.25424	0.3057	0.237325
	SD		0.225848	0.212284	0.108289	0.0240139	0.0871511	0.0757388	0.122858	0.231241	1.22929	0.0698133	0.656857	0.302606	0.210009	0.392701	0.258407	0.103938	0.169126	0.800896	0.0573019	0.106387	0.066745	0.0023372	0.0408901	0.0694567	0.30385	0.340034	0.027962	0.019132	0.0115636
	Range		0.6401	0.6991	0.2775	0.0572	0.228	0.2025	0.3106	0.4584	3.76732	0.149304	1.75398	0.722386	0.574736	0.992131	0.575439	0.265502	0.352899	1.90506	0.154573	0.25588	0.146172	0.0051	0.1099	0.1537	0.8382	0.8915	0.0642	0.0482	0.0266
	Minimum		14.9174	13.7446	2.9775	0.9766	1.4243	0.6389	1.8249	0.6738	3.7501	1.87752	6.40236	1.80457	6.43612	6.59527	4.61638	5.81315	6.15743	6.23452	0.980258	1.99725	0.288604	1.2751	0.5575	1.6256	3.2353	2.4143	0.2203	0.2909	0.2274
	Maximum		15.5575	14.4437	3.255	1.0338	1.6523	0.8414	2.1355	1.1322	7.51742	2.02682	8.15634	2.52696	7.01086	7.5874	5.19182	6.07865	6.51032	8.13958	1.13483	2.25313	0.434777	1.2802	0.6674	1.7793	4.0735	3.3058	0.2845	0.3391	0.254
	Count (n)		8	8	5	5	5	5	5	4	8	7	5	5	5	5	5	5	4	4	5	4	4	4	5	5	5	5	5	5	4
Z. filicauda
male	n=1		12.7063	11.3697	2.4276	0.7087	1.2192	0.6547	1.7335	0.9456	-	-	-	-	4.76525	5.18269	3.94491	5.12141	5.51107	6.6467	0.938322	1.62856	0.280583	1.1963	0.4794	1.4224	3.1248	1.7901	0.2261	0.2026	0.2222
Z. fuliginatus
male	Mean		12.9194	10.6712	2.2282	0.68195	1.0871	0.7557	1.73765	1.2849	5.1712	1.42027	5.69966	-	5.70232	6.15522	4.16065	5.47799	5.55973	7.3951	0.988896	1.51206	0.352369	1.13725	0.55915	1.65355	2.97755	2.8505	0.2625	0.2848	0.2959
	SD		1.18942	0.046669	0.058407	0.0242538	0.069155	0.211001	0.0238295	0.301227	-	-	-	-	0.209297	0.239455	0.049154	0.220524	0.082069	0.259243	0.0606497	0.0920789	0.0555883	0.0422143	0.0938331	0.0700743	0.000919239	0.312541	0.0210718	0.0336583	0.00622254
	Range		1.6821	0.066	0.0826	0.0343	0.0978	0.2984	0.0337	0.426	0	0	0	-	0.295991	0.338641	0.0695143	0.311868	0.116063	0.366625	0.0857716	0.130219	0.0786137	0.0597	0.1327	0.0991	0.0013	0.442	0.0298	0.0476	0.0088																.
	Minimum		12.0783	10.6382	2.1869	0.6648	1.0382	0.6065	1.7208	1.0719	5.1712	1.42027	5.69966	-	5.55432	5.9859	4.12589	5.32206	5.5017	7.21179	0.946011	1.44695	0.313063	1.1074	0.4928	1.604	2.9769	2.6295	0.2476	0.261	0.2915
	Maximum		13.7604	10.7042	2.2695	0.6991	1.136	0.9049	1.7545	1.4979	5.1712	1.42027	5.69966	-	5.85031	6.32454	4.1954	5.63392	5.61776	7.57842	1.03178	1.57717	0.391676	1.1671	0.6255	1.7031	2.9782	3.0715	0.2774	0.3086	0.3003
	Count (n)		2	2	2	2	2	2	2	2	1	1	1	0	2	2	2	2	2	2	2	2	2	2	2	2	2	2	2	2	2
female	Mean		17.9079	13.9053	3.09915	0.98935	1.64465	0.80575	2.04475	1.6672	2.96772	2.96772	-	-	6.84167	7.36552	-	-	6.45526	8.33059	1.25288	2.00028	0.443934	1.23445	0.6705	1.81325	3.64905	3.1134	0.3149	-	0.3328
	SD		0.316572	1.07671	0.00671751	0.00898026	0.0942573	0.0655488	0.10147	0.264458	-	-	-	-	-	-	-	-	-	-	0.0313195	0.0830672	0.0184201	0.0620133	0.0933381	0.080398	-	0.411253	-	-	-
	Range		0.4477	1.5227	0.0095	0.0127	0.1333	0.0927	0.1435	0.374	-	-	-	-	-	-	-	-	-	-	0.0442924	0.117475	0.0260499	0.0877	0.132	0.1137	-	0.5816	-	-	-
	Minimum		17.6841	13.1439	3.0944	0.983	1.578	0.7594	1.973	1.4802	2.96772	2.96772	-	-	6.84167	7.36552	0	0	6.45526	8.33059	1.23074	1.94155	0.430909	1.1906	0.6045	1.7564	3.6475	2.8226	0.3149	0	0.3328
	Maximum		18.1318	14.6666	3.1039	0.9957	1.7113	0.8521	2.1165	1.8542	2.96772	2.96772	-	-	6.84167	7.36552	0	0	6.45526	8.33059	1.27503	2.05902	0.456959	1.2783	0.7365	1.8701	3.6506	3.4042	0.3149	0	0.3328
	Count (n)		2	2	2	2	2	2	2	2	1	1	-	-	1	1	0	0	1	1	2	2	2	2	2	2	2	2	1	0	1
Z. gilboventris
male	Mean		13.1862	12.172	2.7964	0.85114	1.41172	0.68974	1.6425	0.8106	6.54398	1.63544	7.44032	1.81707	6.23949	6.6529	4.26942	5.44787	5.95033	6.37631	0.903381	1.86902	0.393967	1.1271	0.545975	1.455	2.7987	1.84012	0.189	0.20195	0.198725
	SD		0.600543	0.833684	0.114473	0.0790599	0.0688049	0.0791191	0.103822	0.107994	0.701732	0.126749	0.326714	0.0174024	0.608056	0.727235	0.510464	0.443608	0.522663	0.304749	0.0864104	0.0534207	0.0499108	0.0839183	0.0955397	0.0551739	0.126953	0.213733	0.020701	0.018976	0.0203559
	Range		1.6135	2.4835	0.2801	0.1918	0.1822	0.2095	0.2814	0.2355	1.51938	0.265808	0.627649	0.0246108	1.10588	1.31877	1.13187	0.959679	1.04528	0.745008	0.229224	0.148218	0.128006	0.2045	0.2121	0.1359	0.322	0.5576	0.0362	0.0464	0.0439																.
	Minimum		12.0733	10.9398	2.6949	0.7988	1.3081	0.5576	1.4706	0.6503	5.54206	1.51645	7.07404	1.80477	5.5405	5.81643	3.51636	4.83207	5.43043	5.99344	0.774015	1.78554	0.320262	1.0293	0.4217	1.4128	2.5882	1.51	0.1651	0.1797	0.1739
	Maximum		13.6868	13.4233	2.975	0.9906	1.4903	0.7671	1.752	0.8858	7.06144	1.78226	7.70169	1.82938	6.64638	7.1352	4.64823	5.79175	6.47571	6.73845	1.00324	1.93376	0.448268	1.2338	0.6338	1.5487	2.9102	2.0676	0.2013	0.2261	0.2178
	Count (n)		6	6	5	5	5	5	5	4	4	4	3	2	3	3	4	4	3	4	5	5	5	5	4	5	5	5	3	4	4
female	Mean		16.2288	15.1016	2.9684	0.97296	1.5007	0.64105	2.02554	1.37576	7.18792	1.89166	6.89876	1.48639	6.89015	7.32381	4.94279	5.81944	6.37553	7.41288	1.03199	2.15239	0.397972	1.24298	0.618925	1.5951	3.91752	2.42835	0.25185	0.28258	0.220867
	SD		1.1981	1.41704	0.267667	0.11906	0.145264	0.0647508	0.0938262	0.227363	0.752195	0.199015	1.12832	0.496378	0.557936	0.561104	0.561001	0.648015	0.749385	0.804444	0.0444395	0.136456	0.104442	0.0890354	0.0140564	0.0785697	0.219768	0.603153	0.0194569	0.0342526	0.0168833
	Range		2.8925	3.3191	0.7264	0.2864	0.3657	0.1657	0.205	0.5296	1.86777	0.507852	2.5164	0.701984	1.51072	1.59357	1.3401	1.57545	2.18877	2.02208	0.101791	0.393644	0.250522	0.226	0.0317	0.1982	0.6141	1.6383	0.0489	0.078	0.0432
	Minimum		14.5224	13.0499	2.4384	0.8109	1.3475	0.5677	1.9165	1.1277	6.44279	1.71438	5.8225	1.1354	6.20375	6.62688	4.27156	5.00478	5.28307	6.20978	0.989984	1.95043	0.269486	1.1691	0.6064	1.522	3.6538	1.6269	0.2273	0.2458	0.2089
	Maximum		17.4149	16.369	3.1648	1.0973	1.7132	0.7334	2.1215	1.6573	8.31057	2.22223	8.3389	1.83738	7.71447	8.22045	5.61166	6.58022	7.47184	8.23187	1.09178	2.34407	0.520007	1.3951	0.6381	1.7202	4.2679	3.2652	0.2762	0.3238	0.2521
	Count (n)		6	6	6	5	6	6	5	5	6	6	5	2	6	6	5	5	6	5	6	6	6	5	4	6	6	6	6	5	6
Z. gracilipes
male	Mean		13.1862	12.172	2.7964	0.85114	1.41172	0.68974	1.6425	0.8106	6.54398	1.63544	7.44032	1.81707	6.23949	6.6529	4.26942	5.44787	5.95033	6.37631	0.903381	1.86902	0.393967	1.1271	0.545975	1.455	2.7987	1.84012	0.189	0.20195	0.198725
	SD		0.600543	0.833684	0.114473	0.0790599	0.0688049	0.0791191	0.103822	0.107994	0.701732	0.126749	0.326714	0.0174024	0.608056	0.727235	0.510464	0.443608	0.522663	0.304749	0.0864104	0.0534207	0.0499108	0.0839183	0.0955397	0.0551739	0.126953	0.213733	0.020701	0.018976	0.0203559
	Range		1.6135	2.4835	0.2801	0.1918	0.1822	0.2095	0.2814	0.2355	1.51938	0.265808	0.627649	0.0246108	1.10588	1.31877	1.13187	0.959679	1.04528	0.745008	0.229224	0.148218	0.128006	0.2045	0.2121	0.1359	0.322	0.5576	0.0362	0.0464	0.0439																.
	Minimum		12.0733	10.9398	2.6949	0.7988	1.3081	0.5576	1.4706	0.6503	5.54206	1.51645	7.07404	1.80477	5.5405	5.81643	3.51636	4.83207	5.43043	5.99344	0.774015	1.78554	0.320262	1.0293	0.4217	1.4128	2.5882	1.51	0.1651	0.1797	0.1739
	Maximum		13.6868	13.4233	2.975	0.9906	1.4903	0.7671	1.752	0.8858	7.06144	1.78226	7.70169	1.82938	6.64638	7.1352	4.64823	5.79175	6.47571	6.73845	1.00324	1.93376	0.448268	1.2338	0.6338	1.5487	2.9102	2.0676	0.2013	0.2261	0.2178
	Count (n)		6	6	5	5	5	5	5	4	4	4	3	2	3	3	4	4	3	4	5	5	5	5	4	5	5	5	3	4	4
male	Mean		20.063	16.634	3.24485	0.94615	1.63338	0.76295	2.27158	1.55017	9.14381	2.31762	7.54845	-	8.8641	9.4693	6.09035	7.48398	8.47646	10.2417	1.41465	2.07821	0.447747	1.35445	0.60735	1.8807	3.53822	3.76633	0.32195	0.376333	0.306933
	SD		0.481344	0.726643	0.14373	0.0422939	0.130811	0.15801	0.147672	0.309864	0.603805	0.124875	0.849886	-	0.315706	0.277829	0.465324	0.713627	0.570812	0.788176	0.0747002	0.0967892	0.0629235	0.0651285	0.0311678	0.156072	0.169092	0.680638	0.0180312	0.0242715	0.00923598
	Range		1.1227	1.6859	0.3511	0.0896	0.3003	0.3594	0.3455	0.5975	1.32648	0.2619	1.69847	-	0.62698	0.519495	0.929617	1.41627	1.14132	1.57007	0.158463	0.222403	0.122204	0.1555	0.0742	0.3703	0.3962	1.5768	0.0255	0.0451	0.0171
	Minimum		19.6158	15.5994	3.062	0.8896	1.4599	0.6134	2.072	1.2662	8.62952	2.24243	6.71843	-	8.57217	9.26647	5.61291	6.82687	7.89816	9.49722	1.36685	1.98228	0.392357	1.2872	0.5639	1.6687	3.349	3.1127	0.3092	0.3486	0.3004
	Maximum		20.7385	17.2853	3.4131	0.9792	1.7602	0.9728	2.4175	1.8637	9.956	2.50433	8.4169	-	9.19915	9.78597	6.54252	8.24314	9.03948	11.0673	1.52531	2.20468	0.514561	1.4427	0.6381	2.039	3.7452	4.6895	0.3347	0.3937	0.3175
	Count (n)		4	4	4	4	4	4	4	4	4	4	3	-	3	3	3	3	3	3	4	4	4	4	4	4	4	4	2	3	3
Z. grandoculus
male	n=1		14.6336	12.7368	2.4594	0.5855	1.2491	0.64	1.5793	1.0738	5.57942	1.10716	-	-	5.53675	6.14308	-	-	5.55188	6.14011	0.785822	1.47303	0.474628	1.4046	0.4026	1.0846	2.7063	1.5589	0.2375	-	0.2197
Z. grassans
male	Mean		13.7585	11.6702	2.4977	0.799	1.17308	0.84952	1.70534	0.8903	6.15258	1.69075	5.63633	1.48946	6.02268	6.43799	4.18485	4.99259	5.23535	6.4759	1.00519	1.47167	0.43525	1.12292	0.5593	1.7522	3.0081	2.7775	0.290675	0.30755	0.2773
	SD		0.769649	1.13469	0.245191	0.0524651	0.163151	0.0804148	0.160243	0.170097	0.666866	0.222403	0.374275	0.0747928	0.778031	0.747073	0.365685	0.678952	0.264886	0.440177	0.086963	0.0929905	0.117067	0.0650887	0.043685	0.114539	0.147057	0.521118	0.0385503	0.0244756	0.0171081
	Range		2.5997	3.9516	0.6401	0.1264	0.407	0.1981	0.4165	0.353	2.30225	0.708995	0.965032	0.182069	1.8112	1.69639	0.931099	1.74717	0.575422	0.931774	0.221466	0.217095	0.249629	0.1734	0.1105	0.2964	0.3785	1.3982	0.0793	0.059	0.0413																.
	Minimum		12.4206	9.1446	2.2136	0.7296	0.8966	0.7652	1.5056	0.7265	4.85684	1.38302	5.20268	1.37836	5.10229	5.76963	3.73214	4.22125	4.99111	5.94746	0.91357	1.37184	0.281618	1.0579	0.4959	1.6098	2.8613	2.1578	0.2572	0.2744	0.259
	Maximum		15.0203	13.0962	2.8537	0.856	1.3036	0.9633	1.9221	1.0795	7.15909	2.09201	6.16771	1.56043	6.9135	7.46602	4.66324	5.96842	5.56653	6.87923	1.13504	1.58894	0.531247	1.2313	0.6064	1.9062	3.2398	3.556	0.3365	0.3334	0.3003
	Count (n)		9	9	5	4	5	5	5	4	9	7	6	5	4	4	5	5	4	4	5	5	5	5	5	5	5	5	4	4	4
female	Mean		16.9098	15.4083	2.90234	1.00382	1.4102	0.901075	2.35964	1.1855	6.5519	1.79717	4.84757	1.16626	6.861	7.37645	4.81905	5.92006	6.48754	7.7937	1.19727	1.60347	0.502775	1.1971	0.70932	2.09248	3.9619	4.05248	0.34464	0.43816	0.31698
	SD		1.66804	1.58472	0.211289	0.123502	0.127231	0.0547933	0.26637	0.332172	0.780195	0.191444	0.76041	-	0.78158	0.746767	0.657041	0.706181	0.384082	0.877619	0.0547756	0.177539	0.0517035	0.0504196	0.0835413	0.221398	0.433203	0.46247	0.0216726	0.0325931	0.0387653
	Range		4.0735	4.2469	0.5804	0.3048	0.3156	0.1213	0.6389	0.6299	1.66982	0.372807	1.42758	-	1.89681	1.79983	1.64522	1.75579	0.87794	2.10536	0.127925	0.443697	0.128387	0.1099	0.2058	0.5517	1.0745	1.164	0.0508	0.0672	0.0793
	Minimum		14.0564	12.7762	2.5635	0.8122	1.2141	0.8439	1.9259	0.8096	5.39888	1.58557	3.98242	1.16626	5.52711	6.12124	3.71865	4.78215	6.10482	6.27478	1.14133	1.39873	0.44258	1.1328	0.6204	1.7387	3.2302	3.6646	0.3162	0.4033	0.2731
	Maximum		18.1299	17.0231	3.1439	1.117	1.5297	0.9652	2.5648	1.4395	7.0687	1.95838	5.41	1.16626	7.42391	7.92107	5.36387	6.53795	6.98276	8.38014	1.26926	1.84243	0.570968	1.2427	0.8262	2.2904	4.3047	4.8286	0.367	0.4705	0.3524
	Count (n)		5	5	5	5	5	4	5	3	4	3	3	1	5	5	5	5	4	5	4	5	5	5	5	5	5	5	5	5	5
Z. illotus
male	Mean		11.031	10.7105	2.59137	0.816678	1.35997	0.654533	1.29316	0.826512	4.56589	1.25675	4.58863	1.47158	4.60841	4.93655	3.31862	4.17698	4.20062	4.90734	0.797368	1.5952	0.344913	0.927522	0.484922	1.23219	2.10022	1.47381	0.2329	0.227343	0.2098
	SD		0.636058	0.57553	0.161908	0.0765793	0.0965022	0.0342771	0.0932745	0.0871244	0.238487	0.10291	0.450761	0.214785	0.329539	0.411528	0.245184	0.315165	0.245634	0.655769	0.0425217	0.11287	0.0663006	0.0276707	0.0519863	0.0854637	0.140419	0.229243	0.0237761	0.0224786	0.024163
	Range		1.9514	1.7914	0.501	0.228	0.3086	0.1226	0.2515	0.2394	0.602683	0.311116	1.15096	0.486438	0.955826	1.51307	0.574942	0.924572	0.803464	2.0272	0.12325	0.314975	0.188448	0.087	0.1352	0.2889	0.4408	0.7328	0.0666	0.068	0.066																.
	Minimum		9.9612	9.8088	2.3673	0.6864	1.2389	0.5816	1.1589	0.6953	4.23512	1.06645	3.89345	1.22793	4.11704	4.28601	3.00966	3.73616	3.88357	3.385	0.726601	1.41739	0.262616	0.9011	0.4204	1.0567	1.8522	1.1722	0.1956	0.1873	0.167
	Maximum		11.9126	11.6002	2.8683	0.9144	1.5475	0.7042	1.4104	0.9347	4.83781	1.37756	5.04441	1.71437	5.07287	5.79908	3.5846	4.66073	4.68703	5.4122	0.849851	1.73237	0.451064	0.9881	0.5556	1.3456	2.293	1.905	0.2622	0.2553	0.233
	Count (n)		9	9	9	9	9	9	9	8	8	8	8	5	9	9	7	7	8	8	9	9	9	9	9	9	9	9	9	7	8
female	Mean		13.6768	13.438	2.99032	1.06212	1.5297	0.812583	1.55555	0.9536	5.37241	1.63506	4.63494	1.43534	5.39817	5.68406	3.79404	4.85699	4.96492	6.03569	0.924866	1.93184	0.399855	1.06192	0.57245	1.40533	2.76565	2.39842	0.294233	0.31805	0.263767
	SD		0.742976	0.71209	0.154065	0.0282897	0.125924	0.118844	0.117965	0.039011	0.239904	0.186821	0.235563	0.254141	0.402797	0.508654	0.32229	0.242008	0.342054	0.523108	0.0423754	0.138656	0.0681108	0.041712	0.0909975	0.0614827	0.139755	0.358982	0.0184206	0.0232032	0.0314874
	Range		1.9234	1.9736	0.395	0.0603	0.3347	0.2781	0.2902	0.0877	0.57915	0.373413	0.465703	0.494983	1.02296	1.16342	0.909639	0.619145	0.880305	1.53086	0.0978194	0.38797	0.165455	0.1181	0.2641	0.16	0.3988	0.8363	0.0444	0.0629	0.0787
	Minimum		12.3527	12.2072	2.7502	1.037	1.3639	0.6598	1.4072	0.9118	5.15194	1.44459	4.38152	1.22119	4.79514	4.90566	3.47086	4.47804	4.47118	5.30884	0.865312	1.69097	0.313286	0.9963	0.4255	1.3074	2.5057	1.9165	0.2718	0.2762	0.2204
	Maximum		14.2761	14.1808	3.1452	1.0973	1.6986	0.9379	1.6974	0.9995	5.73109	1.818	4.84722	1.71617	5.8181	6.06908	4.3805	5.09718	5.35149	6.8397	0.963131	2.07894	0.478741	1.1144	0.6896	1.4674	2.9045	2.7528	0.3162	0.3391	0.2991
	Count (n)		6	6	6	5	6	6	6	4	5	3	3	3	6	6	6	6	6	6	6	6	6	6	6	6	6	6	6	6	6
Z. impar
male	Mean		11.2334	10.4587	2.27066	0.6703	1.14806	0.601525	1.38984	0.921238	4.45815	1.09767	4.63668	1.29802	4.3767	4.67884	3.33964	3.94259	4.059	5.03946	0.75923	1.39284	0.343112	1.01162	0.506886	1.31351	2.55262	1.70371	0.205925	0.211375	0.202771
	SD		0.740309	0.649676	0.115096	0.05373	0.0722016	0.0536815	0.121817	0.182388	0.433005	0.0603572	0.447203	0.129451	0.331789	0.322723	0.476293	0.415902	0.485345	0.56662	0.0674818	0.0716242	0.0659999	0.061243	0.0441757	0.0866675	0.290201	0.184887	0.0139014	0.0170555	0.0144197
	Range		2.5838	2.0606	0.3664	0.141	0.209	0.1848	0.327	0.5219	1.42635	0.172734	1.16214	0.349372	1.03217	0.917844	1.5134	1.09136	1.24543	1.4167	0.208789	0.222122	0.185547	0.1905	0.1079	0.2299	0.9125	0.5213	0.045	0.0501	0.0382																.
	Minimum		9.4653	9.0627	2.0574	0.6013	1.0331	0.5074	1.1931	0.6287	3.8315	1.03397	4.18458	1.16158	3.74972	4.15939	2.85123	3.43757	3.51299	4.30591	0.637502	1.23357	0.252499	0.8896	0.4502	1.1881	2.0212	1.3996	0.1836	0.1931	0.1822
	Maximum		12.0491	11.1233	2.4238	0.7423	1.2421	0.6922	1.5201	1.1506	5.25785	1.20671	5.34672	1.51095	4.78189	5.07723	4.36463	4.52893	4.75841	5.72261	0.846291	1.45569	0.438045	1.0801	0.5581	1.418	2.9337	1.9209	0.2286	0.2432	0.2204
	Count (n)		10	10	8	8	8	8	8	8	10	7	7	6	8	8	8	7	7	7	8	8	8	8	7	8	8	8	8	8	7
Z. inconstans
male	Mean		11.423	9.66237	2.19632	0.64264	1.08266	0.63972	1.2234	0.99238	5.39355	1.38694	5.68223	1.53109	4.73399	5.16803	3.33339	4.26455	4.37291	5.5896	0.751703	1.45089	0.401355	1.0768	0.47792	1.2479	2.0735	1.64896	0.18716	0.19036	0.189267
	SD		1.11752	0.745532	0.166405	0.0698488	0.0947948	0.0323088	0.175422	0.288188	0.253242	0.0956581	0.407683	0.376613	0.227564	0.25615	0.707829	0.47892	0.144938	0.0626828	0.10315	0.0864253	0.053068	0.026178	0.0590895	0.0735773	0.142378	0.374406	0.0210011	0.0254969	0.0188744
	Range		2.6536	1.9012	0.407	0.1943	0.2528	0.0832	0.4489	0.6642	0.694135	0.231388	1.01141	0.785374	0.552776	0.644364	1.98566	1.23485	0.281838	0.118162	0.276948	0.223125	0.130068	0.0534	0.1416	0.1796	0.369	0.882	0.0432	0.0559	0.0376																.
	Minimum		10.0489	8.8525	2.0828	0.5436	0.988	0.5982	1.0268	0.6452	5.13061	1.31905	5.31513	1.15909	4.58158	4.88611	2.42241	3.82236	4.21242	5.51842	0.596073	1.33234	0.354957	1.0477	0.4039	1.1221	1.8732	1.1411	0.1657	0.16	0.1695
	Maximum		12.7025	10.7537	2.4898	0.7379	1.2408	0.6814	1.4757	1.3094	5.82475	1.55044	6.32654	1.94447	5.13436	5.53048	4.40807	5.05721	4.49426	5.63659	0.873021	1.55547	0.485025	1.1011	0.5455	1.3017	2.2422	2.0231	0.2089	0.2159	0.2071
	Count (n)		6	6	5	5	5	5	5	5	6	5	5	4	5	5	5	5	3	3	5	5	5	5	5	5	5	5	5	5	3
female	Mean		11.3561	10.5171	2.29257	0.6893	1.15265	0.5482	1.37787	0.760717	5.37824	1.4908	5.07806	1.59138	4.78953	5.16582	3.31437	4.0588	4.43277	5.73712	0.767271	1.49438	0.322775	1.02297	0.491817	1.22038	2.1829	2.02387	0.193867	0.235583	0.177933
	Standard Deviation		0.595049	0.354275	0.0461612	0.0565345	0.05028	0.0789788	0.0987549	0.131202	0.247007	0.0856919	0.382825	0.693892	0.220012	0.18769	0.102381	0.172228	0.347299	0.179672	0.0471901	0.0395868	0.0517227	0.036825	0.0431412	0.0786694	0.0884887	0.244891	0.0100424	0.0216645	0.0171981
	Range		1.764	0.7785	0.1358	0.1556	0.1391	0.1982	0.2693	0.3144	0.694131	0.246587	1.02007	1.66701	0.496201	0.485555	0.274851	0.467969	0.908652	0.477668	0.120335	0.115706	0.118103	0.0997	0.1339	0.1893	0.2178	0.6382	0.0255	0.0566	0.0407
	Minimum		10.3842	10.1575	2.2073	0.628	1.0744	0.4222	1.2071	0.5975	5.15788	1.35033	4.547	0.390964	4.59286	4.87924	3.23667	3.80774	3.9652	5.46745	0.715641	1.44402	0.266154	0.9893	0.4268	1.1157	2.0555	1.677	0.1809	0.2032	0.1555
	Maximum		12.1482	10.936	2.3431	0.7836	1.2135	0.6204	1.4764	0.9119	5.85201	1.59692	5.56707	2.05797	5.08906	5.3648	3.51152	4.27571	4.87385	5.94512	0.835976	1.55972	0.384257	1.089	0.5607	1.305	2.2733	2.3152	0.2064	0.2598	0.1962
	Count		6	6	6	6	6	6	6	6	6	6	6	5	6	6	6	6	6	6	6	6	6	6	6	6	6	6	6	6	6
Z. janus
male	Mean		17.6296	16.7444	3.24457	1.08169	1.63014	1.20523	2.36819	1.32433	7.38127	2.30235	5.47604	2.08341	7.11622	7.49173	5.2847	5.83877	7.72797	8.37312	1.42428	1.84457	0.421714	1.42236	0.826029	2.31856	4.90547	3.0527	0.5165	0.485567	0.4035
	SD		1.39412	1.10296	0.221814	0.161387	0.0730063	0.120773	0.154541	0.25622	0.862074	0.213113	0.916621	0.152435	0.774071	0.829114	0.660326	0.718911	0.685587	1.00612	0.0945009	0.148054	0.109524	0.0779843	0.0690202	0.206373	0.445218	0.280985	0.0660801	0.0468838	0.0568924
	Range		4.1065	3.4029	0.635	0.4331	0.2203	0.3423	0.4927	0.7074	2.44539	0.650519	2.43577	0.215575	2.03632	2.12274	1.70768	1.78726	1.75118	2.52906	0.27119	0.439116	0.291122	0.2102	0.1759	0.6718	1.3196	0.8172	0.179	0.1276	0.1587																.
	Minimum		15.4413	14.9549	2.9756	0.9258	1.4999	1.0547	2.0378	0.9367	6.20242	1.92722	4.2895	1.97562	6.23485	6.56081	4.54385	5.07566	6.84706	7.15562	1.31479	1.58334	0.290194	1.3093	0.7366	1.9539	3.9941	2.594	0.4249	0.416	0.322
	Maximum		19.5478	18.3578	3.6106	1.3589	1.7202	1.397	2.5305	1.6441	8.64781	2.57774	6.72527	2.19119	8.27118	8.68355	6.25153	6.86293	8.59824	9.68468	1.58598	2.02246	0.581316	1.5195	0.9125	2.6257	5.3137	3.4112	0.6039	0.5436	0.4807
	Count (n)		10	10	7	7	7	7	7	6	9	9	7	2	6	6	6	6	5	5	6	7	7	7	7	7	7	7	6	6	5
female	Mean		20.5292	19.7297	3.68536	1.25666	1.87029	1.23852	2.79047	1.53345	7.33783	2.24429	6.34164	1.95404	7.70456	8.1231	5.70909	6.35423	7.45293	8.84017	1.5155	2.03203	0.572658	1.53422	0.92225	2.66171	5.97097	5.15065	0.6123	0.5957	0.448214
	SD		1.09548	1.24051	0.108864	0.102824	0.117719	0.120149	0.271473	0.213621	0.607807	0.174002	0.326891	0.0529649	0.703641	0.626873	0.387972	0.43027	0.813302	0.676122	0.0923595	0.152309	0.0690809	0.0579719	0.0447873	0.163136	0.277352	0.523612	0.0350809	0.0364118	0.048184
	Range		2.9445	3.3394	0.3867	0.3378	0.3651	0.3975	0.9189	0.6731	1.99492	0.50339	0.722987	0.105886	2.22947	1.78539	1.20901	1.41413	2.43601	2.0023	0.280832	0.35429	0.188699	0.1944	0.1404	0.5334	0.9849	1.4123	0.1073	0.0977	0.136
	Minimum		19.0125	18.0842	3.5147	1.1062	1.6256	0.9805	2.2802	1.3106	6.34343	1.99382	5.91449	1.90167	6.65181	7.17186	4.92598	5.71574	6.18951	7.91965	1.36617	1.91367	0.488324	1.4179	0.8204	2.4016	5.4902	4.405	0.5518	0.5341	0.393
	Maximum		21.957	21.4236	3.9014	1.444	1.9907	1.378	3.1991	1.9837	8.33834	2.49721	6.63747	2.00756	8.88128	8.95725	6.13499	7.12987	8.62551	9.92194	1.647	2.26796	0.677023	1.6123	0.9608	2.935	6.4751	5.8173	0.6591	0.6318	0.529
	Count (n)		8	8	8	8	8	8	8	8	8	7	6	4	8	8	8	8	7	7	7	7	7	8	8	8	8	8	8	8	7
Z. kartaboides
male	Mean		11.597	10.8862	2.62697	0.788233	1.38557	0.653867	1.57943	0.788033	5.5717	3.68419	6.15231	-	5.12697	5.22758	2.7132	3.63693	-	-	0.786097	1.66258	0.32516	1.05767	0.541267	1.39653	2.28517	1.6789	2.03649	0.1829	-
	SD		0.373067	0.509556	0.111678	0.0216038	0.0683579	0.02185	0.0799803	0.0616289	0.45651	2.72146	-	-	-	-	-	-	-	-	0.0620201	0.0294408	0.0324989	0.0325608	0.0622768	0.108678	0.114634	0.0407076	2.59351	-	-
	Range		0.3994	1.0191	0.2229	0.0432	0.1365	0.0031	0.0164	0.0971	0.645603	3.84872	-	-	-	-	-	-	-	-	0.0943615	0.054772	0.00386437	0.0221	0.0889	0.0572	0.0884	0.0444	3.66777	-	-																.
	Minimum		11.2154	10.3753	2.5114	0.7664	1.3151	0.6287	1.5253	0.7442	5.2489	1.75983	6.15231	-	5.12697	5.22758	2.7132	3.63693	-	-	0.739615	1.64144	0.2877	1.0223	0.4909	1.3074	2.1799	1.6395	0.2026	0.1829	-
	Maximum		11.6148	11.3944	2.7343	0.8096	1.4516	0.668	1.5417	0.8585	5.8945	5.60855	6.15231	-	5.12697	5.22758	2.7132	3.63693	-	-	0.856519	1.69621	0.345822	1.0864	0.6109	1.3646	2.2683	1.7208	3.87037	0.1829	-
	Count (n)		3	3	3	3	3	3	3	3	2	2	1	-	1	1	1	1	0	0	3	3	3	3	3	3	3	3	2	1	0
Z. kartabensis
male	Mean		11.9388	11.3389	2.7629	0.7207	1.34115	0.6191	1.5113	0.8115	6.31769	1.82648	6.31841	2.11342	5.48462	6.29525	3.678	4.97203	4.86965	6.1218	0.909261	1.77524	0.43073	1.0918	0.56925	1.3081	2.3155	1.72495	0.2353	0.22855	0.20765
	SD		0.834159	1.03324	0.164332	-	0.0620133	0.035921	-	-	0.642989	0.0670919	0.263987	0.100182	0.732529	0.480232	0.762082	0.445178	0.610453	1.0564	0.123612	0.161111	0.019935	0.0767918	0.0426385	0.146371	0.139583	0.0785596	0.0552958	0.0745998	0.0224153
	Range		1.6974	2.0701	0.2324	0	0.0877	0.0508	0	0	1.40503	0.134124	0.506788	0.141679	1.03595	0.67915	1.07775	0.629576	0.863311	1.49397	0.174813	0.227845	0.0281924	0.1086	0.0603	0.207	0.1974	0.1111	0.0782	0.1055	0.0317																.
	Minimum		10.9747	10.2699	2.6467	0.7207	1.2973	0.5937	1.5113	0.8115	5.56591	1.75826	6.02227	2.04258	4.96665	5.95567	3.13912	4.65724	4.43799	5.37481	0.821854	1.66132	0.416634	1.0375	0.5391	1.2046	2.2168	1.6694	0.1962	0.1758	0.1918
	Maximum		12.6721	12.34	2.8791	0.7207	1.385	0.6445	1.5113	0.8115	6.97094	1.89238	6.52906	2.18426	6.0026	6.63482	4.21687	5.28682	5.3013	6.86879	0.996668	1.88916	0.444826	1.1461	0.5994	1.4116	2.4142	1.7805	0.2744	0.2813	0.2235
	Count (n)		4	4	2	1	2	2	1	1	4	3	3	2	2	2	2	2	2	2	2	2	2	2	2	2	2	2	2	2	2
female	Mean		16.5273	15.8289	3.58176	1.24474	1.73834	0.87618	2.103	1.16395	7.87452	2.27148	6.21353	2.3979	7.2092	8.06288	5.03138	6.09949	6.34954	7.54174	1.20448	2.26432	0.503801	1.27332	0.68098	1.73454	3.70624	3.62173	0.36992	0.39498	0.30962
	SD		0.798733	0.476542	0.147396	0.097262	0.13382	0.0310821	0.097868	0.0689003	0.524263	0.145641	0.517628	-	0.674111	0.425645	0.281633	0.388554	0.392727	0.436187	0.0632107	0.252737	0.055979	0.048362	0.0193109	0.117856	0.217869	0.373662	0.0125406	0.0359898	0.0460687
	Range		1.964	1.0922	0.3753	0.2134	0.355	0.0858	0.2553	0.1525	1.24323	0.343844	1.19866	-	1.82181	1.1734	0.699698	0.968078	0.9746	0.969196	0.148824	0.604962	0.131284	0.122	0.0509	0.2521	0.5613	0.8927	0.0279	0.0926	0.1003
	Minimum		15.4864	15.3175	3.462	1.1106	1.5633	0.8299	1.9602	1.0877	7.29032	2.13315	5.60148	2.3979	6.31179	7.44203	4.71048	5.69926	5.75322	7.2157	1.15624	1.86099	0.43624	1.2147	0.6515	1.5824	3.4449	3.1668	0.3562	0.3417	0.2616
	Maximum		17.4504	16.4097	3.8373	1.324	1.9183	0.9157	2.2155	1.2402	8.53355	2.47699	6.80013	2.3979	8.13359	8.61543	5.41018	6.66734	6.72782	8.18489	1.30506	2.46596	0.567524	1.3367	0.7024	1.8345	4.0062	4.0595	0.3841	0.4343	0.3619
	Count (n)		5	5	5	5	5	5	5	4	5	4	4	1	5	5	5	5	5	4	5	5	4	5	5	5	5	4	5	5	5
Z. korystos
male	Mean		10.9848	10.4817	2.45997	0.630767	1.3324	0.621067	1.33917	0.856433	5.57068	1.32355	6.89818	-	5.40182	5.84026	4.09143	4.9447	5.22039	6.16517	0.804855	1.59621	0.356818	1.08547	0.527533	1.11933	2.566	1.29667	0.173567	0.1635	0.15845
	SD		0.801081	0.52102	0.151916	0.149941	0.162461	0.085438	0.199191	0.0813383	0.26254	-	-	-	0.23157	0.27671	0.101712	0.0931544	0.330728	0.0361812	0.0456085	0.150066	0.0907825	0.0599003	0.0747196	0.176907	0.0868552	0.174321	0.00569766	0.0156978	0.00403051
	Range		1.1329	0.9227	0.2801	0.2661	0.2985	0.1651	0.3936	0.1619	0.495481	-	-	-	0.448068	0.552043	0.143842	0.13174	0.46772	0.0511679	0.0825795	0.300013	0.180589	0.1124	0.1353	0.3099	0.162	0.346	0.0102	0.0222	0.0057																.
	Minimum		10.4184	9.8806	2.3539	0.4578	1.1461	0.5258	1.1246	0.7709	5.37311	1.32355	6.89818	-	5.14395	5.55297	4.01951	4.87883	4.98653	6.13959	0.752381	1.44378	0.271951	1.0173	0.4782	0.9151	2.5031	1.1113	0.167	0.1524	0.1556
	Maximum		11.5513	10.8033	2.634	0.7239	1.4446	0.6909	1.5182	0.9328	5.86859	1.32355	6.89818	-	5.59202	6.10501	4.16336	5.01057	5.45425	6.19076	0.83496	1.74379	0.45254	1.1297	0.6135	1.225	2.6651	1.4573	0.1772	0.1746	0.1613
	Count (n)		2	3	3	3	3	3	3	3	3	1	1	0	3	3	2	2	2	2	3	3	3	3	3	3	3	3	3	2	2
Z. laticornis
male	Mean		10.8206	10.6916	2.3872	0.72532	1.25206	0.58004	1.62342	0.6161	4.34383	1.3202	4.04512	1.6202	3.97233	4.39459	3.00994	3.82187	3.59968	4.61111	0.833278	1.48751	0.378543	1.06704	0.61762	1.38126	2.50964	1.76003	0.2013	0.23722	0.21448
	SD		0.520629	0.490657	0.160109	0.0994743	0.0430018	0.0502958	0.128342	0.151493	0.234257	0.0541684	0.463064	0.263363	0.302159	0.373692	0.29198	0.356913	0.55729	0.298419	0.0593383	0.0694772	0.0867339	0.0650635	0.0226512	0.0937857	0.210725	0.10419	0.0175765	0.0274222	0.0263395
	Range		1.4935	1.364	0.3435	0.2305	0.1061	0.1193	0.3093	0.3549	0.601438	0.136729	1.05199	0.604282	0.754388	0.876609	0.711082	0.851642	1.49577	0.617382	0.13257	0.186773	0.229408	0.1581	0.0572	0.2139	0.5017	0.2432	0.0445	0.0578	0.0641																.
	Minimum		9.9422	9.7917	2.1952	0.6071	1.209	0.5049	1.5246	0.475	4.05485	1.24377	3.43126	1.39736	3.6323	4.0403	2.50957	3.40022	2.72714	4.33006	0.787122	1.37215	0.273697	0.9944	0.5823	1.2605	2.3006	1.6605	0.1714	0.2101	0.1867
	Maximum		11.4357	11.1557	2.5387	0.8376	1.3151	0.6242	1.8339	0.8299	4.65628	1.3805	4.48324	2.00164	4.38668	4.91691	3.22065	4.25187	4.22291	4.94744	0.919692	1.55892	0.503105	1.1525	0.6395	1.4744	2.8023	1.9037	0.2159	0.2679	0.2508
	Count (n)		8	8	5	5	5	5	5	4	7	7	6	4	5	5	5	5	5	5	4	5	5	5	5	5	5	4	5	5	5
female	Mean		13.6702	13.3966	2.8434	0.95936	1.4238	0.5885	2.08182	1.23047	4.59952	1.47095	3.25832	1.50642	4.67599	5.1252	3.49524	4.14681	4.24497	5.20951	1.04284	1.80032	0.433071	1.18708	0.6737	1.60594	3.46506	3.33604	0.2955	0.382267	0.2483
	SD		0.733782	0.676101	0.120505	0.0537822	0.080899	0.100219	0.21968	0.178234	0.793859	0.33373	0.66372	0.40857	0.50325	0.26127	0.325474	0.733682	0.547562	0.559413	0.052357	0.04264	0.0637136	0.0359331	0.0298731	0.246631	0.162496	0.480421	0.0304044	0.0244447	0.00478853
	Range		1.7564	1.7062	0.3366	0.1391	0.2096	0.2044	0.5308	0.4198	1.37726	0.64726	1.31609	0.577805	0.987297	0.486358	0.645437	1.30516	1.08202	1.09588	0.142335	0.10932	0.145144	0.0997	0.0642	0.6064	0.4369	1.1506	0.0533	0.0471	0.0095
	Minimum		12.38	12.2574	2.6568	0.8782	1.3271	0.4769	1.7495	0.9855	3.68285	1.19436	2.55027	1.21752	4.12586	4.93717	3.19692	3.30064	3.75272	4.72665	0.982179	1.73982	0.368734	1.1411	0.6362	1.2243	3.2753	2.5356	0.2604	0.3625	0.2432
	Maximum		14.1364	13.9636	2.9934	1.0173	1.5367	0.6813	2.2803	1.4053	5.06011	1.84162	3.86636	1.79532	5.11316	5.42353	3.84236	4.6058	4.83474	5.82253	1.12451	1.84914	0.513879	1.2408	0.7004	1.8307	3.7122	3.6862	0.3137	0.4096	0.2527
	Count (n)		5	5	5	5	5	5	5	4	3	3	3	2	3	3	3	3	3	3	5	5	5	5	5	5	5	5	3	3	3
Z. leucogrammus
male	Mean		19.0465	17.8098	3.65862	1.19228	1.93624	1.17006	2.51486	1.13484	7.19773	2.44818	5.99499	1.80569	8.26507	8.57346	5.74407	6.61497	7.31725	8.56345	1.45829	2.18467	0.515299	1.49592	0.959325	2.27456	4.14632	3.76988	0.5165	0.50318	0.40868
	SD		1.28727	0.871742	0.218665	0.189325	0.0890124	0.130449	0.0671442	0.195979	0.851672	0.282316	0.687318	0.406753	0.29745	0.233584	0.159192	0.263653	0.391478	0.663907	0.0761439	0.127382	0.080929	0.0829055	0.0514107	0.144828	0.185757	0.226868	0.0522661	0.0265642	0.0221478
	Range		3.836	2.7743	0.5563	0.4706	0.2432	0.329	0.1581	0.4528	2.13339	0.709494	1.42857	0.826986	0.781428	0.486033	0.361686	0.733209	0.863926	1.39935	0.201406	0.31999	0.173121	0.1905	0.1149	0.3701	0.4286	0.6382	0.1238	0.0572	0.0521																.
	Minimum		16.7983	16.4319	3.3623	0.8985	1.8339	1.0509	2.3997	0.7848	5.97198	2.06055	5.19854	1.37076	7.93616	8.39462	5.59018	6.29461	6.81471	7.85446	1.36895	1.98296	0.411178	1.3957	0.9131	2.14	4.0126	3.4525	0.4502	0.4775	0.3854
	Maximum		20.6343	19.2062	3.9186	1.3691	2.0771	1.3799	2.5578	1.2376	8.10537	2.77004	6.62711	2.19774	8.71759	8.88065	5.95187	7.02782	7.67864	9.25381	1.57035	2.30295	0.584299	1.5862	1.028	2.5101	4.4412	4.0907	0.574	0.5347	0.4375
	Count (n)		9	9	5	5	5	5	5	5	6	6	4	4	5	5	5	5	5	5	5	5	4	5	4	5	5	5	5	5	5
female	Mean		22.9819	21.9047	4.17828	1.40892	2.1614	1.26494	3.09906	1.3334	7.81449	2.65478	5.86272	1.23527	9.27126	8.85001	6.57412	7.51255	8.13516	9.82357	1.67061	2.5032	0.55394	1.71346	1.01028	2.68794	5.1854	5.73748	0.582925	0.72692	0.47586
	SD		1.09737	1.16675	0.174628	0.150364	0.118102	0.138851	0.201324	0.30272	0.334537	0.0231623	0.775802	0.234065	0.470741	1.61189	0.455369	0.285015	0.540323	0.659053	0.0397695	0.117131	0.065781	0.0829755	0.0728103	0.210594	0.237402	0.532532	0.0400971	0.0227061	0.0225739
	Range		2.9591	3.196	0.4026	0.3994	0.2984	0.3405	0.5093	0.809	0.723561	0.0460061	1.3825	0.331018	1.1418	3.7134	1.0826	0.791107	1.42194	1.79698	0.0817111	0.317882	0.150408	0.1993	0.1956	0.5563	0.5683	1.2847	0.0889	0.0609	0.0584
	Minimum		21.6656	20.6108	3.9179	1.1722	2.0396	1.1315	2.9178	1.0033	7.43959	2.63334	5.37481	1.06976	8.74626	6.59352	5.8497	7.13295	7.24068	8.77818	1.62777	2.37142	0.481528	1.5799	0.8966	2.4759	4.967	5.2609	0.5315	0.6896	0.4521
	Maximum		24.6247	23.8068	4.3205	1.5716	2.338	1.472	3.4271	1.8123	8.16315	2.67934	6.75731	1.40078	9.88806	10.3069	6.9323	7.92406	8.66262	10.5752	1.70948	2.68931	0.631936	1.7792	1.0922	3.0322	5.5353	6.5456	0.6204	0.7505	0.5105
	Count (n)		5	5	5	5	5	5	5	5	4	3	3	2	4	4	5	5	5	5	5	5	5	5	5	5	5	5	4	5	5
Z. lewisi
male	Mean		19.199	17.8764	3.72065	1.30018	1.7439	1.05488	2.24437	1.35003	10.3221	3.18723	9.62203	3.72486	9.66149	10.1477	7.32859	8.33982	9.34206	11.0619	1.82246	1.9868	0.573829	1.55558	0.750425	2.15597	4.63505	2.36932	0.37895	0.3526	0.298425
	SD		0.821944	0.689771	0.162798	0.0445762	0.186481	0.139625	0.232264	0.220497	0.336207	0.397775	0.691579	0.200016	0.432212	0.465553	0.414699	0.782585	0.493335	1.1205	0.0782363	0.0643796	0.113661	0.0199907	0.0576416	0.0723912	0.27549	0.0823301	0.0352285	0.0199113	0.0158115
	Range		1.4402	1.512	0.381	0.0953	0.4013	0.3016	0.5518	0.4877	0.637376	0.761467	1.3237	0.282866	0.982889	1.01937	0.912534	1.67181	1.04943	2.37157	0.173388	0.141545	0.247539	0.0439	0.132	0.1727	0.5938	0.1899	0.0742	0.0477	0.0286																.
	Minimum		18.7077	17.3869	3.4919	1.2484	1.4675	0.9341	1.9202	1.1405	9.94155	2.74	8.84437	3.58343	9.03157	9.47159	6.7207	7.17245	8.62083	9.39901	1.7085	1.94043	0.457506	1.5271	0.6693	2.0612	4.4437	2.2898	0.3449	0.3321	0.2838
	Maximum		20.1479	18.8989	3.8729	1.3437	1.8688	1.2357	2.472	1.6282	10.5789	3.50146	10.1681	3.86629	10.0145	10.491	7.63323	8.84426	9.67027	11.7706	1.88189	2.08198	0.705045	1.571	0.8013	2.2339	5.0375	2.4797	0.4191	0.3798	0.3124
	Count (n)		3	4	4	4	4	4	4	4	3	3	3	2	4	4	4	4	4	4	4	4	4	4	4	4	4	4	4	4	4
female	Mean		23.2876	20.9601	4.2656	1.5021	2.0558	1.1954	2.86385	1.42525	10.5666	3.54478	8.45592	2.80782	-	-	8.1717	9.10551	9.43393	10.2618	1.83473	2.317	0.714121	1.7193	0.8734	2.47965	6.18775	5.7651	0	0.44865	0.3492
	SD		1.08972	-	0.347048	0.134209	0.179181	0.0705693	0.181373	0.0381131	0.325252	0.0204241	0.942376	0.27024	-	-	0.544227	0.584831	-	-	0.587658	0.0756702	0.0534096	0.0354968	0.0274357	0.17416	0.0515481	-	-	0.00586899	-
	Range		1.5411	0	0.4908	0.1898	0.2534	0.0998	0.2565	0.0539	0.459975	0.0288841	1.33272	0.382176	-	-	0.769654	0.827076	-	-	0.831075	0.107014	0.0755326	0.0502	0.0388	0.2463	0.0729	-	-	0.0083	-
	Minimum		22.5171	20.9601	4.0202	1.4072	1.9291	1.1455	2.7356	1.3983	10.3366	3.53034	7.78956	2.61674	-	-	7.78687	8.69198	9.43393	10.2618	1.41919	2.2635	0.676355	1.6942	0.854	2.3565	6.1513	5.7651	-	0.4445	0.3492
	Maximum		24.0582	20.9601	4.511	1.597	2.1825	1.2453	2.9921	1.4522	10.7966	3.55922	9.12228	2.99891	-	-	8.55652	9.51905	9.43393	10.2618	2.25026	2.37051	0.751888	1.7444	0.8928	2.6028	6.2242	5.7651	-	0.4528	0.3492
	Count (n)		2	1	2	2	2	2	2	2	2	2	2	2	-	-	2	2	1	1	2	2	2	2	2	2	2	1	1	2	1
Z. litigiosus
male	Mean		18.1515	16.7386	3.36868	1.08636	1.73356	1.10248	2.50126	1.25326	6.76494	2.21291	6.16616	1.6171	7.21729	7.55402	5.22687	6.00912	7.28555	8.54525	1.34525	1.94981	0.560208	1.501	0.8297	2.34266	4.63826	3.72238	0.50405	0.46394	0.39624
	SD		0.496843	0.503788	0.0887965	0.0313536	0.0736957	0.09629	0.174878	0.198146	0.72273	0.195302	0.383319	0.410221	0.307392	0.294756	0.234092	0.158405	0.239097	0.488046	0.0583236	0.0661435	0.0512341	0.0608347	0.0824556	0.0514691	0.313013	0.3655	0.0145645	0.0268823	0.0203552
	Range		1.6954	1.5901	0.2337	0.0768	0.1722	0.2471	0.4343	0.5448	2.18556	0.568981	1.09009	1.148	0.66554	0.655307	0.610261	0.374925	0.587113	1.21781	0.153607	0.158392	0.109561	0.1549	0.1949	0.1277	0.7708	0.9132	0.0299	0.0558	0.0559																.
	Minimum		17.1044	16.0172	3.2817	1.0452	1.6643	0.9366	2.2803	1.0186	5.52491	1.88173	5.63081	0.840253	6.90978	7.16547	5.01143	5.90824	7.07649	7.7681	1.27153	1.90046	0.503191	1.4224	0.6947	2.2574	4.3942	3.088	0.4864	0.4414	0.3734
	Maximum		18.7998	17.6073	3.5154	1.122	1.8365	1.1837	2.7146	1.5634	7.71047	2.45071	6.7209	1.98825	7.57532	7.82077	5.62169	6.28316	7.6636	8.98591	1.42514	2.05885	0.612752	1.5773	0.8896	2.3851	5.165	4.0012	0.5163	0.4972	0.4293
	Count (n)		11	11	5	5	5	5	5	5	11	10	9	8	4	4	5	5	5	5	5	5	5	5	5	5	5	5	4	5	5
female	Mean		20.8829	19.5115	3.52953	1.1798	1.80222	1.11012	2.7239	1.7161	6.9084	2.28846	4.35382	1.31668	7.11198	7.59936	5.08898	5.93196	7.16193	7.92847	1.5478	2.0914	0.608645	1.6362	0.953217	2.58498	5.44858	5.38892	0.6356	0.56986	0.45646
	SD		0.847813	1.0244	0.192158	0.132325	0.0409211	0.160403	0.164853	0.361252	0.45354	0.0967907	1.20322	0.256612	0.517343	0.316929	0.347952	0.545516	0.623562	0.845616	0.0922075	0.097509	0.0157095	0.0347264	0.0449955	0.134636	0.461354	0.223523	0.0654275	0.044345	0.0504104
	Range		2.1958	2.8695	0.5549	0.3264	0.0876	0.4241	0.4972	0.9938	1.38462	0.216339	2.25463	0.362904	1.18318	0.721514	0.829305	1.41593	1.41122	2.12092	0.235722	0.215171	0.039815	0.0984	0.1333	0.2953	1.2033	0.6038	0.1403	0.1098	0.1232
	Minimum		19.7536	18.3363	3.236	1.0604	1.7577	0.9221	2.4593	1.2383	6.15006	2.15956	2.98366	1.13522	6.39836	7.33506	4.78499	5.40273	6.4583	7.28481	1.44455	1.98378	0.589378	1.5901	0.8687	2.4816	4.8285	5.054	0.5899	0.5366	0.4077
	Maximum		21.9494	21.2058	3.7909	1.3868	1.8453	1.3462	2.9565	2.2321	7.53468	2.3759	5.23829	1.49813	7.58154	8.05657	5.6143	6.81866	7.86951	9.40574	1.68027	2.19895	0.629193	1.6885	1.002	2.7769	6.0318	5.6578	0.7302	0.6464	0.5309
	Count (n)		6	6	6	5	6	6	6	6	6	4	3	2	4	4	5	5	5	5	5	5	5	6	6	6	6	6	4	5	5
Z. longipes
male	Mean		15.7716	13.7141	3.17601	1.10007	1.63519	0.882125	1.85521	1.21737	6.38899	1.88279	6.30089	2.18569	6.89489	7.06608	4.82337	5.98937	6.54733	7.94856	1.3007	1.91681	0.419147	1.2604	0.751662	1.66288	3.08355	3.49471	0.330363	0.3587	0.335688
	SD		1.40169	1.25144	0.284597	0.136846	0.189917	0.0699162	0.232714	0.270296	0.626414	0.113968	0.918771	0.423337	0.706575	0.524874	0.445451	0.675997	0.703264	1.06007	0.161731	0.176156	0.0661758	0.138311	0.0759825	0.696144	0.485834	0.868105	0.0527567	0.0613954	0.0546143
	Range		4.2964	3.8195	0.9696	0.4826	0.5893	0.2242	0.668	0.7626	2.04664	0.406798	2.50522	1.01028	2.26366	1.43594	1.18853	1.81385	1.9759	2.66781	0.495129	0.588955	0.186894	0.4273	0.2071	2.2492	1.2662	2.479	0.1556	0.1778	0.1498																.
	Minimum		13.6169	11.691	2.7051	0.8185	1.4001	0.7277	1.5011	0.8344	5.59121	1.73997	5.22222	1.6793	5.94839	6.33295	4.17184	5.00138	5.45591	6.56737	1.11548	1.56309	0.29927	1.0332	0.6572	0.0831	2.4365	2.6486	0.2464	0.2876	0.2642
	Maximum		17.9133	15.5105	3.6747	1.3011	1.9894	0.9519	2.1691	1.597	7.63785	2.14677	7.72744	2.68958	8.21205	7.76889	5.36036	6.81523	7.43181	9.23518	1.61061	2.15204	0.486164	1.4605	0.8643	2.3323	3.7027	5.1276	0.402	0.4654	0.414
	Count (n)		12	12	8	8	8	8	8	8	12	12	12	8	8	7	8	8	8	8	8	8	7	8	8	8	8	8	8	8	8
female	Mean		17.3852	16.0855	3.31546	1.0769	1.73177	0.9478	2.03379	1.36942	6.80418	1.97475	6.11959	1.99397	7.50513	7.94316	5.14713	6.37764	7.10493	8.83004	1.27881	2.08669	0.524722	1.33279	0.85205	1.9067	3.41288	3.69399	0.40431	0.467956	0.35077
	SD		1.17782	1.19977	0.289015	0.141377	0.147123	0.206375	0.155711	0.305934	0.83839	0.203868	1.27977	0.200356	0.831347	0.885427	0.546855	0.552878	0.787801	0.808798	0.118013	0.230093	0.083073	0.0578465	0.0828189	0.134685	0.296835	0.651586	0.041395	0.0488615	0.023157
	Range		3.1731	3.9212	1.0141	0.4788	0.5111	0.6776	0.4146	0.9042	2.59375	0.70226	3.32182	0.529275	2.33905	2.43842	1.25516	1.9269	2.13825	2.78893	0.345196	0.726557	0.251318	0.1887	0.2674	0.4401	0.8674	2.044	0.1429	0.1232	0.0692
	Minimum		15.1898	14.0741	2.7426	0.7607	1.491	0.6947	1.839	0.9703	5.66934	1.6716	4.22303	1.70784	6.40881	6.78296	4.54445	5.43984	6.0711	7.66931	1.08463	1.6332	0.408365	1.2566	0.7372	1.6408	2.9483	2.7769	0.3403	0.4007	0.3137
	Maximum		18.3629	17.9953	3.7567	1.2395	2.0021	1.3723	2.2536	1.8745	8.26308	2.37386	7.54484	2.23711	8.74786	9.22138	5.79961	7.36674	8.20934	10.4582	1.42983	2.35976	0.659684	1.4453	1.0046	2.0809	3.8157	4.8209	0.4832	0.5239	0.3829
	Count (n)		10	10	10	10	10	10	10	10	10	10	10	7	10	10	9	9	10	10	10	10	10	10	10	10	10	10	10	9	10
Z. luridus
male	Mean		13.8871	13.076	2.79732	0.8726	1.48426	0.83032	1.6176	1.03173	5.24699	2.03214	4.42988	1.51859	5.25658	5.67249	4.09652	5.08858	5.23498	6.74044	0.927825	1.70358	0.376576	1.14552	0.58752	1.46124	2.7581	2.07696	0.31906	0.31962	0.305433
	SD		0.764658	0.71757	0.0893149	0.0652805	0.0563051	0.0201531	0.14648	0.118689	0.653969	0.164928	0.70609	0.128646	0.807176	0.52393	0.477343	0.515435	0.567765	0.652422	0.0701036	0.127029	0.0526161	0.0408878	0.0754749	0.188026	0.36544	0.177059	0.0292531	0.0228018	0.0421574
	Range		2.3158	2.0105	0.2038	0.155	0.1524	0.0451	0.3645	0.2336	1.7423	0.461636	1.70472	0.331361	2.08165	1.40443	1.22909	1.30437	1.01327	1.2155	0.170661	0.295329	0.128331	0.103	0.1988	0.4934	0.9506	0.4052	0.0717	0.0578	0.0831																.
	Minimum		12.9559	12.4885	2.7102	0.7899	1.397	0.8071	1.5037	0.9214	4.20703	1.76072	3.63642	1.38364	4.5159	5.01464	3.66044	4.49225	4.87631	6.26968	0.848182	1.57758	0.312121	1.0991	0.4788	1.2884	2.4226	1.8872	0.2731	0.2946	0.268
	Maximum		15.2717	14.499	2.914	0.9449	1.5494	0.8522	1.8682	1.155	5.94933	2.22235	5.34114	1.715	6.59754	6.41906	4.88953	5.79662	5.88958	7.48517	1.01884	1.87291	0.440452	1.2021	0.6776	1.7818	3.3732	2.2924	0.3448	0.3524	0.3511
	Count (n)		8	8	5	5	5	5	5	4	7	7	7	6	5	5	5	5	3	3	5	5	5	5	5	5	5	5	5	5	3
female	Mean		15.4796	14.7678	3.06842	1.00038	1.60894	0.88864	1.71768	0.9853	5.6991	2.08038	3.72535	1.40451	6.15679	6.79576	4.38094	5.40142	5.88943	7.37925	1.06537	1.85518	0.421305	1.14708	0.6831	1.57188	2.89594	2.84236	0.33312	0.40854	0.34516
	SD		2.00382	1.91602	0.344481	0.156284	0.221822	0.108438	0.348835	0.0970119	1.20062	0.165189	0.152728	0.055976	0.909377	1.05025	0.584481	0.534543	0.835543	0.952815	0.131732	0.210371	0.0903371	0.106705	0.13718	0.199843	0.644374	0.730834	0.19866	0.0801826	0.0308779
	Range		5.2185	5.1562	0.8306	0.414	0.5753	0.2635	0.7894	0.1936	3.0542	0.396337	0.35986	0.0791621	1.95199	2.24804	1.42638	1.2965	2.26412	2.55491	0.334746	0.448563	0.184357	0.2559	0.3797	0.4762	1.7799	1.6699	0.494	0.1943	0.0781
	Minimum		13.2632	12.1431	2.7419	0.8147	1.3932	0.7785	1.2998	0.8922	4.71823	1.89562	3.52601	1.36493	5.48715	6.09817	3.8484	5.00047	4.94196	6.35273	0.901113	1.67303	0.330118	1.0655	0.5232	1.3329	2.1056	2.1146	0	0.2959	0.3029
	Maximum		18.4817	17.2993	3.5725	1.2287	1.9685	1.042	2.0892	1.0858	7.77243	2.29196	3.88587	1.44409	7.43915	8.3462	5.27477	6.29697	7.20608	8.90763	1.23586	2.12159	0.514475	1.3214	0.9029	1.8091	3.8855	3.7845	0.494	0.4902	0.381
	Count (n)		5	5	5	5	5	5	5	3	5	4	4	2	4	4	5	5	5	5	5	5	5	5	5	5	5	5	5	5	5
Z. mattogrossensis
male	Mean		9.8519	9.3688	2.40094	0.79478	1.22556	0.60082	1.0898	0.89752	4.07964	1.29635	3.5729	1.36768	4.51676	5.28337	3.09356	4.0136	3.77526	4.95585	0.826173	1.46017	0.310721	0.91898	0.445	1.22886	2.03468	1.6192	0.26656	0.24548	0.206225
	SD		0.466807	0.265232	0.0912988	0.0524684	0.0939474	0.0645039	0.102409	0.0720425	0.209518	0.081607	0.476619	0.236643	0.101728	0.680744	0.233158	0.107402	0.129217	0.294775	0.0611299	0.0290756	0.0762385	0.0719615	0.0653963	0.162095	0.210287	0.204043	0.0335761	0.0150372	0.0245857
	Range		1.3055	0.7265	0.2223	0.1397	0.235	0.1695	0.2382	0.1918	0.447481	0.176975	1.03132	0.334664	0.276	1.81319	0.641567	0.291541	0.308784	0.682871	0.148218	0.0666317	0.21268	0.1664	0.1619	0.4089	0.5468	0.5042	0.0838	0.0413	0.0553																.
	Minimum		9.1815	9.0284	2.2879	0.7398	1.0674	0.5143	1.0103	0.8179	3.89386	1.1791	2.96346	1.20034	4.38365	4.62285	2.79459	3.86896	3.63826	4.54564	0.721537	1.41641	0.205026	0.8223	0.3537	1.07	1.8434	1.3233	0.2413	0.2216	0.1854
	Maximum		10.487	9.7549	2.5102	0.8795	1.3024	0.6838	1.2485	1.0097	4.34134	1.35608	3.99478	1.53501	4.65965	6.43604	3.43616	4.1605	3.94705	5.22851	0.869755	1.48305	0.417706	0.9887	0.5156	1.4789	2.3902	1.8275	0.3251	0.2629	0.2407
	Count (n)		5	5	5	5	5	5	5	5	4	4	4	2	5	5	5	5	4	4	5	5	5	5	5	5	5	5	5	5	4
	Mean		10.9802	10.6049	2.4935	0.80088	1.32472	0.6448	1.29414	0.85025	4.56196	1.34122	3.41895	1.18555	5.12986	5.66718	3.7096	4.50182	4.4207	5.27207	0.954525	1.62464	0.419364	0.96726	0.515	1.2939	2.22162	2.19274	0.301475	0.2846	0.234175
female	SD		0.595451	0.82247	0.241128	0.130344	0.109135	0.0394148	0.120543	0.0758597	0.226661	0.0681196	0.35046	0.0460246	0.329396	0.294525	0.443755	0.998058	0.14617	0.438374	0.0864048	0.0859502	0.101105	0.0511538	0.0473221	0.0336508	0.0801328	0.557136	0.0269844	0.0495251	0.0131063
	Range		1.423	2.2485	0.5544	0.2673	0.2547	0.1041	0.2839	0.16	0.529852	0.164269	0.80681	0.0983571	0.76428	0.61022	1.05942	2.73449	0.331883	0.993024	0.193504	0.240044	0.251219	0.1441	0.1016	0.0724	0.1804	1.5145	0.0495	0.1315	0.0285
	Minimum		10.2972	9.3364	2.1958	0.6744	1.1969	0.5912	1.1398	0.7912	4.24147	1.29733	3.0182	1.12329	4.67021	5.22604	3.40221	3.21668	4.2998	4.7316	0.838684	1.51563	0.336348	0.8922	0.4655	1.2643	2.138	1.2769	0.2769	0.2159	0.2166
	Maximum		11.7202	11.5849	2.7502	0.9417	1.4516	0.6953	1.4237	0.9512	4.77132	1.4616	3.82501	1.22165	5.43449	5.83626	4.46163	5.95117	4.63168	5.72463	1.03219	1.75568	0.587567	1.0363	0.5671	1.3367	2.3184	2.7914	0.3264	0.3474	0.2451
	Count (n)		5	5	5	5	5	5	5	4	5	5	5	4	4	4	5	5	4	4	4	5	5	5	5	5	5	5	4	5	4
Z. means
female	Mean		18.2924	15.7071	2.96962	0.992025	1.47992	0.81396	2.33044	1.57258	6.62314	1.74809	6.23455	1.76166	7.09075	7.39725	5.04928	6.50239	6.38425	8.62236	1.31875	1.91081	0.449376	1.3517	0.68556	2.0927	3.78484	4.2705	0.423875	0.491025	0.3785
	SD		0.874641	0.816539	0.187024	0.0625038	0.0947228	0.110567	0.106775	0.117517	0.241962	0.176027	0.531063	0.0534863	0.461225	0.587356	0.377612	0.41532	-	-	0.137203	0.1015	0.113078	0.128091	0.0784344	0.237513	0.261445	0.197152	0.080744	0.0273113	-
	Range		2.3704	1.9132	0.4641	0.1283	0.2452	0.2826	0.2877	0.2819	0.58	0.354513	1.02263	0.075641	1.0803	1.25255	0.781225	0.927248	-	-	0.301241	0.259722	0.277134	0.2775	0.2038	0.6566	0.607	0.4877	0.1912	0.0661	-
	Minimum		16.9399	14.7549	2.6791	0.9252	1.3963	0.6299	2.178	1.4459	6.27591	1.5839	5.80608	1.72384	6.54629	6.55278	4.72148	5.89245	6.38425	8.62236	1.12478	1.82008	0.355162	1.2091	0.5754	1.7583	3.4868	3.9643	0.3105	0.4553	0.3785
	Maximum		19.3103	16.6681	3.1432	1.0535	1.6415	0.9125	2.4657	1.7278	6.85591	1.93841	6.8287	1.79948	7.62659	7.80534	5.50271	6.8197	6.38425	8.62236	1.42602	2.0798	0.632296	1.4866	0.7792	2.4149	4.0938	4.452	0.5017	0.5214	0.3785
	Count (n)		5	5	5	4	5	5	5	4	5	4	3	2	4	4	4	4	1	1	5	5	5	5	5	5	5	5	4	4	1
Z. mimus
male	Mean		10.6394	9.79612	2.19518	0.63108	1.1298	0.64784	1.39788	0.87345	4.88577	1.17824	4.85284	1.62427	4.31041	4.81832	3.20575	3.83011	4.13043	4.99429	0.749243	1.31566	0.308712	1.00968	0.49174	1.2541	2.16608	1.4916	0.20194	0.211775	0.193375
	SD		0.597975	0.601556	0.0893858	0.0505574	0.131191	0.0371798	0.167102	0.0946466	0.449823	0.0764803	0.723344	0.335387	0.230443	0.226546	0.0862534	0.280533	0.312329	0.325027	0.0692684	0.0341753	0.0955366	0.0669259	0.0497233	0.0916561	0.140241	0.233934	0.0128572	0.0170883	0.0335315
	Range		1.6307	1.5793	0.2114	0.1245	0.3512	0.0902	0.3829	0.2033	1.22198	0.204805	1.87534	0.782314	0.6364	0.581162	0.204337	0.644246	0.721664	0.780577	0.188763	0.0725307	0.209397	0.1568	0.12	0.2527	0.3314	0.5436	0.0338	0.0412	0.0807																.
	Minimum		9.6933	8.6042	2.0987	0.5861	0.9125	0.5823	1.1849	0.8032	4.511	1.10118	3.72156	1.29844	3.99675	4.53144	3.10087	3.42367	3.73512	4.62535	0.6473	1.29342	0.200652	0.9525	0.421	1.1055	2.0136	1.1887	0.1828	0.1937	0.1492
	Maximum		11.324	10.1835	2.3101	0.7106	1.2637	0.6725	1.5678	1.0065	5.73298	1.30599	5.59689	2.08075	4.63315	5.1126	3.30521	4.06792	4.45678	5.40593	0.836063	1.36595	0.410049	1.1093	0.541	1.3582	2.345	1.7323	0.2166	0.2349	0.2299
	Count (n)		6	6	5	5	5	5	5	4	6	5	5	4	5	5	4	4	4	4	5	4	5	5	5	5	5	5	5	4	4
female	Mean		13.1449	12.2303	2.46045	0.798438	1.15879	0.665887	1.66688	0.991775	5.38196	1.94371	4.70474	-	5.23165	5.61719	3.86656	4.705	4.84758	5.92489	0.870652	1.52916	0.357868	1.07569	0.51365	1.37292	2.72699	2.35729	0.243043	0.287129	0.236617
	SD		0.632183	0.658108	0.21283	0.111056	0.128832	0.0646746	0.225386	0.182883	0.58014	1.31624	0.621017	-	0.350267	0.411505	0.2936	0.387427	0.343284	0.26986	0.0866332	0.176523	0.0917137	0.0581993	0.0688172	0.114762	0.276497	0.262039	0.0162103	0.0230185	0.0129136
	Range		2.2352	2.1247	0.6966	0.3569	0.3651	0.1727	0.6465	0.5219	1.92067	3.73189	1.48376	-	1.0727	1.17542	0.766296	1.2627	1.12254	0.858834	0.244604	0.576658	0.249045	0.1855	0.1766	0.3245	0.8204	0.8402	0.0431	0.0617	0.0287
	Minimum		11.8224	10.9334	1.971	0.5829	0.9328	0.555	1.223	0.7125	4.73796	1.16707	3.85804	-	4.91906	5.25762	3.65764	4.06072	4.3353	5.40108	0.70263	1.18998	0.218872	0.9372	0.4299	1.1982	2.2263	1.8002	0.2274	0.2438	0.2203
	Maximum		14.0576	13.0581	2.6676	0.9398	1.2979	0.7277	1.8695	1.2344	6.65863	4.89896	5.3418	-	5.99175	6.43304	4.42393	5.32342	5.45783	6.25992	0.947234	1.76664	0.467916	1.1227	0.6065	1.5227	3.0467	2.6404	0.2705	0.3055	0.249
	Count (n)		8	8	8	8	8	8	8	8	8	7	4	-	7	7	6	7	7	7	8	8	8	8	8	8	8	8	7	7	6
Z. minutus
male	Mean		9.00248	8.34018	1.90488	0.505133	1.018	0.510867	1.13655	0.79925	3.86393	1.03931	3.68036	-	4.36011	4.49107	3.35173	3.91481	4.24813	5.50862	0.576883	1.14885	0.273551	0.893233	0.373283	0.912583	1.56167	1.23267	0.15452	0.15155	0.1542
	SD		0.85801	0.657628	0.138186	0.0878069	0.0747115	0.0367839	0.0824799	0.150587	0.366718	0.0957463	-	-	0.553653	0.25593	0.537556	0.511001	0.523902	0.5822	0.070353	0.144357	0.0354568	0.0355984	0.0231666	0.0766738	0.169905	0.0827129	0.0283481	0.0151404	0.0227149
	Range		2.3337	1.9094	0.3207	0.2603	0.2229	0.1054	0.2083	0.4609	0.936814	0.175962	-	-	1.32803	0.599315	1.63381	1.34199	1.3689	1.28411	0.191279	0.40836	0.0927145	0.1118	0.0539	0.2121	0.4324	0.2489	0.0628	0.0412	0.0584																.
	Minimum		7.8003	7.2536	1.7221	0.3531	0.9144	0.4604	1.0185	0.5709	3.49839	0.973142	-	-	3.97524	4.25858	2.54062	3.21643	3.66825	4.86685	0.509367	0.979573	0.220133	0.8331	0.3404	0.7994	1.3786	1.0846	0.1251	0.127	0.1238
	Maximum		10.134	9.163	2.0428	0.6134	1.1373	0.5658	1.2268	1.0318	4.4352	1.1491	3.68036	-	5.30327	4.8579	4.17442	4.55841	5.03715	6.15095	0.700645	1.38793	0.312847	0.9449	0.3943	1.0115	1.811	1.3335	0.1879	0.1682	0.1822
	Count (n)		6	6	6	6	6	6	6	6	5	3	1	-	5	5	6	6	5	5	6	6	6	6	6	6	6	6	5	6	5
female	Mean		10.7026	9.83615	2.06565	0.50325	1.15535	0.6074	1.35575	0.87375	4.77375	1.19441	3.5332	0.938857	4.91956	5.10628	3.79714	4.445	4.60731	5.90649	0.604812	1.29656	0.281504	0.9487	0.4566	1.0385	1.7262	1.463	0.2045	0.17015	0.16665
	SD		0.00311127	0.388838	0.166099	0.0785596	0.0965201	0.0130108	0.0341533	0.0808223	0.100602	0.101792	0.18682	-	0.0808992	0.00413008	0.0384489	0.0561156	0.020212	0.224196	0.0720186	0.0375431	0.0820702	0.033234	0	0.0776403	0.117238	0.606132	0.025173	0.00714178	0.01393
	Range		0.0044	0.5499	0.2349	0.1111	0.1365	0.0184	0.0483	0.1143	0.142272	0.143955	0.264204	-	0.114409	0.00584081	0.0543749	0.0793594	0.028584	0.317061	0.10185	0.0530939	0.116065	0.047	0	0.1098	0.1658	0.8572	0.0356	0.0101	0.0197
	Minimum		10.7004	9.5612	1.9482	0.4477	1.0871	0.5982	1.3316	0.8166	4.70261	1.12243	3.4011	0.938857	4.86235	5.10336	3.76995	4.40532	4.59302	5.74796	0.553887	1.27001	0.223472	0.9252	0.4566	0.9836	1.6433	1.0344	0.1867	0.1651	0.1568
	Maximum		10.7048	10.1111	2.1831	0.5588	1.2236	0.6166	1.3799	0.9309	4.84488	1.26639	3.6653	0.938857	4.97676	5.1092	3.82433	4.48468	4.62161	6.06502	0.655737	1.32311	0.339537	0.9722	0.4566	1.0934	1.8091	1.8916	0.2223	0.1752	0.1765
	Count (n)		2	2	2	2	2	2	2	2	2	2	2	1	2	2	2	2	2	2	2	2	2	2	2	2	2	2	2	2	2
Z. nigromaculatus
	n=1		16.4573	14.6329	3.2277	1.1125	1.4853	0.7423	1.8968	1.1468	7.90329	1.98417	7.91553	2.27015	7.39692	7.98874	5.53709	6.84953	7.19924	8.62189	1.15692	1.54526	0.559217	1.3431	0.5816	1.6446	3.7046	2.5965	0.2375	0.3131	0.2083
Z. nugax
male	Mean		10.2254	9.60905	2.20643	0.6516	1.15733	0.620243	1.19823	0.835767	4.42081	1.16149	4.58238	1.29477	4.29924	4.57298	3.18347	3.97073	4.03894	5.13164	0.663384	1.33682	0.27178	0.890686	0.429257	1.0827	2.02791	1.36289	0.178529	0.180086	0.16715
	SD		0.3813	0.277417	0.0541066	0.0352089	0.0304581	0.0492881	0.0981478	0.0257021	0.328717	0.149024	0.63669	0.415982	0.221379	0.213251	0.128771	0.199492	0.117528	0.38323	0.0409417	0.0826757	0.0563279	0.068362	0.0665312	0.0529053	0.140445	0.176854	0.0146385	0.0134643	0.0190343
	Range		1.2757	0.9207	0.1556	0.1066	0.0832	0.153	0.28	0.0692	1.04347	0.444305	1.84648	1.18031	0.601685	0.619371	0.368109	0.489509	0.25973	0.826668	0.123108	0.225625	0.180378	0.1886	0.1988	0.1473	0.3302	0.447	0.0393	0.0362	0.0368																.
	Minimum		9.5072	9.2418	2.1266	0.6071	1.1163	0.5309	1.0884	0.7969	4.05851	0.956954	3.48953	0.540195	3.99099	4.20339	2.99422	3.68141	3.86518	4.75072	0.624634	1.20345	0.163683	0.774	0.3486	1.0205	1.8459	1.117	0.1588	0.1645	0.1492
	Maximum		10.7829	10.1625	2.2822	0.7137	1.1995	0.6839	1.3684	0.8661	5.10198	1.40126	5.33602	1.7205	4.59267	4.82276	3.36233	4.17091	4.12491	5.57738	0.747742	1.42907	0.344061	0.9626	0.5474	1.1678	2.1761	1.564	0.1981	0.2007	0.186
	Count (n)		11	11	7	7	7	7	7	6	11	11	11	8	7	7	7	7	4	4	7	7	7	7	7	7	7	7	7	7	4
female	Mean		12.9913	12.6672	2.52645	0.776933	1.32007	0.735017	1.57797	1.1172	5.33434	1.39775	4.43355	1.31148	5.1518	5.51852	3.50318	4.46885	4.8951	6.05093	0.819488	1.66996	0.329797	1.0237	0.509267	1.33617	2.87212	2.03158	0.210933	0.2577	0.2137
	SD		0.691172	0.619745	0.113779	0.0483701	0.0921452	0.078471	0.116831	0.167679	0.258558	0.0658693	0.584768	0.0352616	0.231866	0.340426	0.413413	0.381609	0.270046	0.301176	0.069741	0.0801227	0.080969	0.0572864	0.0791135	0.119699	0.28618	0.29112	0.105794	0.0437911	0.0210072
	Range		1.8834	1.7774	0.261	0.1238	0.2444	0.1911	0.3143	0.4712	0.688562	0.191325	1.5104	0.0498675	0.52473	0.917565	1.12548	1.01589	0.745734	0.864264	0.173481	0.215279	0.209613	0.1398	0.1854	0.313	0.8845	0.7461	0.296	0.12	0.0541
	Minimum		12.2536	11.7157	2.3844	0.7093	1.1697	0.6496	1.3488	0.8877	4.896	1.31962	3.9392	1.28655	4.85624	5.05854	2.76486	3.71608	4.51614	5.54588	0.746554	1.5282	0.224151	0.9486	0.4261	1.1805	2.3997	1.7304	0	0.2216	0.1936
	Maximum		14.137	13.4931	2.6454	0.8331	1.4141	0.8407	1.6631	1.3589	5.58456	1.51094	5.4496	1.33641	5.38097	5.97611	3.89034	4.73197	5.26187	6.41014	0.920035	1.74348	0.433764	1.0884	0.6115	1.4935	3.2842	2.4765	0.296	0.3416	0.2477
	Count (n)		6	6	6	6	6	6	6	6	6	6	5	2	5	5	6	6	6	6	6	6	6	6	6	6	6	6	6	6	6
Z. panamensis
male	Mean		11.9592	11.1864	2.63702	0.79155	1.3566	0.68048	1.52844	1.03712	6.18582	1.64994	7.31521	2.12408	5.65551	6.03973	4.06532	4.85957	5.22291	6.39945	0.946109	1.77997	0.420724	1.1222	0.52944	1.44346	2.52932	1.87958	0.20575	0.20308	0.18236
	SD		0.610032	0.612715	0.21484	0.0533046	0.099204	0.0596238	0.0847829	0.19655	0.424956	0.107036	0.898601	0.149071	0.239492	0.420499	0.409577	0.229557	0.36037	0.414855	0.0693207	0.0426423	0.024988	0.0505204	0.0455425	0.105162	0.262908	0.129759	0.00873403	0.020572	0.0219415
	Range		1.6561	1.6999	0.5677	0.1099	0.2769	0.1638	0.1918	0.468	1.25745	0.376655	2.04662	0.263829	0.53571	0.93462	0.988324	0.551725	0.896422	1.02521	0.152672	0.10821	0.0624292	0.1218	0.0985	0.2521	0.649	0.3658	0.0197	0.054	0.0577																.
	Minimum		11.2484	10.4102	2.3044	0.7366	1.2325	0.6141	1.4408	0.7633	5.83381	1.48371	6.62158	2.03225	5.35259	5.7251	3.66386	4.69807	4.68026	5.8469	0.885988	1.72552	0.380313	1.0745	0.4756	1.3563	2.3063	1.7081	0.1956	0.1702	0.1607
	Maximum		12.9045	12.1101	2.8721	0.8465	1.5094	0.7779	1.6326	1.2313	7.09125	1.86036	8.6682	2.29608	5.8883	6.65972	4.65219	5.24979	5.57669	6.87211	1.03866	1.83373	0.442742	1.1963	0.5741	1.6084	2.9553	2.0739	0.2153	0.2242	0.2184
	Count (n)		9	9	5	4	5	5	5	4	9	9	5	3	4	4	5	5	5	5	5	5	5	5	5	5	5	5	4	5	5
female	Mean		14.3402	13.4303	2.8515	0.8693	1.50275	0.6683	1.7694	1.1938	6.48411	1.76101	6.69092	2.37998	6.09254	6.56737	4.45668	5.4486	5.80986	6.97837	1.00032	1.98463	0.350092	1.17725	0.54165	1.5773	3.30545	2.5908	0.2359	0.2829	0.2118
	SD		1.33445	1.5294	0.35426	0.180454	0.119855	0.173807	0.231224	0.200253	1.77606	0.174706	0.124277	-	0.901016	1.03136	0.281542	0.858195	0.62175	1.26867	0.0275493	0.389145	0.108138	0.0628618	0.0762968	0.162493	0.388414	0.101399	0.0480833	0.0121622	0.0354968
	Range		1.8872	2.1629	0.501	0.2552	0.1695	0.2458	0.327	0.2832	2.51173	0.247071	0.175755	-	1.27423	1.45856	0.398161	1.21367	0.879288	1.79416	0.0389606	0.550335	0.15293	0.0889	0.1079	0.2298	0.5493	0.1434	0.068	0.0172	0.0502
	Minimum		13.3966	12.3488	2.601	0.7417	1.418	0.5454	1.6059	1.0522	5.22824	1.63747	6.60305	2.37998	5.45542	5.83809	4.2576	4.84177	5.37022	6.08129	0.980838	1.70946	0.273627	1.1328	0.4877	1.4624	3.0308	2.5191	0.2019	0.2743	0.1867
	Maximum		15.2838	14.5117	3.102	0.9969	1.5875	0.7912	1.9329	1.3354	7.73997	1.88454	6.7788	2.37998	6.72965	7.29665	4.65576	6.05544	6.2495	7.87545	1.0198	2.2598	0.426557	1.2217	0.5956	1.6922	3.5801	2.6625	0.2699	0.2915	0.2369
	Count (n)		2	2	2	2	2	2	2	2	2	2	2	1	2	2	2	2	2	2	2	2	2	2	2	2	2	2	2	2	2
Z. paracephalus
male	Mean		12.5114	11.615	2.65445	0.7855	1.3749	0.60915	1.4905	0.933125	6.79329	1.66578	7.61479	-	6.17623	6.64546	4.61771	5.67775	6.07933	7.4791	0.892774	1.7084	0.302622	1.10915	0.544375	1.4032	2.42505	1.66575	0.202725	0.2162	0.206525
	SD		0.76697	0.715264	0.054376	0.072154	0.0543356	0.0932806	0.138001	0.180628	0.401785	0.0888069	0.556054	-	0.380602	0.374881	0.0867869	0.219559	0.211432	0.274461	0.0761761	0.0565787	0.0854164	0.0840775	0.0552542	0.0936223	0.177961	0.19085	0.0143813	0.00919529	0.00445524
	Range		1.7342	1.5354	0.1156	0.1435	0.1251	0.2128	0.3289	0.4014	0.970192	0.215477	1.05375	-	0.718181	0.915908	0.165589	0.490358	0.458965	0.580763	0.162316	0.135372	0.181613	0.1874	0.1207	0.2001	0.3746	0.4052	0.0305	0.0191	0.0095																.
	Minimum		11.8707	10.7417	2.6168	0.7036	1.3036	0.5194	1.3519	0.7689	6.25621	1.56039	7.03917	-	5.81945	6.17159	4.53258	5.50496	5.85982	7.07765	0.795273	1.64939	0.245029	0.988	0.4629	1.2668	2.22	1.4052	0.1924	0.2089	0.2013
	Maximum		13.6049	12.2771	2.7324	0.8471	1.4287	0.7322	1.6808	1.1703	7.2264	1.77587	8.09292	-	6.53763	7.0875	4.69817	5.99532	6.31878	7.65841	0.957589	1.78477	0.426642	1.1754	0.5836	1.4669	2.5946	1.8104	0.2229	0.228	0.2108
	Count (n)		4	4	4	4	4	4	4	4	4	4	4	-	4	4	4	4	4	4	4	4	4	4	4	4	4	4	4	4	4
female	n=1		3.00482	2.75946	0.6209	0.20904	0.31242	0.1543	0.40996	0.22594	1.39932	0	0	0	1.34766	1.3814	0.931081	1.14092	1.26572	1.42446	0.22055	0.406695	0.112686	0.24562	0.11354	0.31102	0.74994	0.5334	0.05474	0.06694	0.05016
Z. pedestris
male	Mean		10.601	10.1567	2.29096	0.66624	1.19304	0.59524	1.27862	0.9529	4.49261	1.13964	5.53047	1.54803	4.2183	4.55337	3.21572	3.8686	4.1113	5.04251	0.714868	1.46969	0.269552	0.96838	0.45684	1.23556	2.167	1.26457	0.18808	0.20092	0.174325
	SD		0.721552	0.650572	0.0798306	0.0462263	0.0864825	0.0728329	0.0582415	0.21292	0.505168	0.0861023	0.198292	0.0971813	0.424952	0.275926	0.276495	0.394975	0.611034	0.687251	0.0543998	0.095602	0.0456319	0.0630878	0.0345577	0.0674856	0.112702	0.0511426	0.0167089	0.0175293	0.0327075
	Range		1.7717	1.7564	0.1873	0.115	0.1791	0.1918	0.1384	0.5239	1.68543	0.288654	0.516943	0.262723	1.05029	0.587967	0.671867	0.938032	1.49089	1.50616	0.14119	0.242191	0.109398	0.1618	0.094	0.1867	0.2457	0.0991	0.0463	0.0401	0.0756																.
	Minimum		9.6253	9.2977	2.1882	0.6064	1.0922	0.5175	1.216	0.6966	3.51023	0.995225	5.23011	1.39838	3.77969	4.28989	2.99942	3.58325	3.39677	4.40309	0.660778	1.36356	0.193127	0.8986	0.4013	1.1544	2.0314	1.2179	0.1683	0.1816	0.1416
	Maximum		11.397	11.0541	2.3755	0.7214	1.2713	0.7093	1.3544	1.2205	5.19565	1.28388	5.74705	1.6611	4.82998	4.87785	3.67129	4.52129	4.88766	5.90925	0.801968	1.60575	0.302524	1.0604	0.4953	1.3411	2.2771	1.317	0.2146	0.2217	0.2172
	Count (n)		8	8	5	5	5	5	5	5	8	8	7	5	5	5	5	5	4	4	5	5	5	5	5	5	5	4	5	5	4
female	Mean		13.0866	12.5147	2.64656	0.85648	1.35864	0.67714	1.61814	1.0871	5.08098	1.35144	4.40384	1.19449	4.59303	4.91354	3.7027	4.76126	4.69965	5.5853	0.879889	1.62219	0.322133	1.02414	0.49654	1.35472	2.80186	2.04738	0.2644	0.26504	0.2296
	SD		0.68293	0.908293	0.0854046	0.0491041	0.0844746	0.0462482	0.149772	0.254521	0.332505	0.0658208	0.357934	0.388653	0.598412	0.295352	0.476819	0.832449	0.346183	0.321362	0.0374628	0.151085	0.0831698	0.0512707	0.0125117	0.0834252	0.261687	0.289105	0.0155424	0.0299206	0.024693
	Range		1.4795	2.3622	0.2305	0.1047	0.2127	0.1086	0.3665	0.5353	0.886969	0.161511	0.865351	0.680508	1.538	0.741253	1.30513	1.96039	0.860498	0.763905	0.094186	0.371486	0.202174	0.1201	0.0312	0.2204	0.6712	0.7163	0.0375	0.0723	0.0572
	Minimum		12.1533	11.1017	2.5502	0.8122	1.2713	0.6299	1.4376	0.8458	4.58794	1.27096	4.01979	0.962678	3.5719	4.58058	2.98573	4.27417	4.30413	5.21354	0.819423	1.47623	0.209928	0.9671	0.4838	1.2611	2.519	1.5697	0.2425	0.2134	0.2044
	Maximum		13.6328	13.4639	2.7807	0.9169	1.484	0.7385	1.8041	1.3811	5.47491	1.43247	4.88514	1.64319	5.1099	5.32184	4.29087	6.23457	5.16463	5.97744	0.913609	1.84772	0.412102	1.0872	0.515	1.4815	3.1902	2.286	0.28	0.2857	0.2616
	Count (n)		5	5	5	5	5	5	5	5	5	5	5	3	5	5	5	5	5	5	5	5	5	5	5	5	5	5	5	5	5
Z. plagiatus
female	Mean		14.32	13.8028	3.19836	1.02856	1.6421	0.74284	1.96508	1.03782	6.54729	1.90674	6.27048	1.77239	6.52369	7.06568	4.43537	5.48364	5.78987	7.06526	1.01834	2.09451	0.468979	1.18846	0.5752	1.61694	3.30998	2.94752	0.2888	0.32688	0.2417
	SD		0.898778	0.934624	0.186001	0.0743609	0.0974821	0.106342	0.205344	0.1016	1.00911	0.207319	0.828128	0.411523	0.625025	0.47101	0.440048	0.308772	0.290774	0.480817	0.0744815	0.16347	0.0212124	0.0364023	0.118802	0.0887619	0.206905	0.342316	0.0304535	0.0233397	0.0133909
	Range		2.2333	2.2885	0.501	0.1797	0.2508	0.2229	0.5067	0.245	2.74539	0.597746	2.15097	1.05734	1.35221	0.98691	1.08437	0.733285	0.654795	1.16878	0.198866	0.399105	0.0530001	0.101	0.2832	0.2482	0.5258	0.7619	0.0731	0.0578	0.0273
	Minimum		13.1997	12.9153	2.9737	0.9277	1.4751	0.6325	1.7323	0.9189	4.85031	1.5253	5.35769	1.06999	5.7332	6.47632	3.75096	5.04081	5.45563	6.43431	0.9054	1.83002	0.439432	1.143	0.3861	1.4802	3.0829	2.5305	0.2476	0.3073	0.2286
	Maximum		15.433	15.2038	3.4747	1.1074	1.7259	0.8554	2.239	1.1639	7.5957	2.12305	7.50866	2.12734	7.08541	7.46323	4.83533	5.77409	6.11042	7.60308	1.10427	2.22913	0.492432	1.244	0.6693	1.7284	3.6087	3.2924	0.3207	0.3651	0.2559
	Count (n)		6	6	5	5	5	5	5	5	6	6	5	5	5	5	5	5	5	4	5	5	5	5	5	5	5	5	5	5	5
Z. prolixus
male	Mean		9.3545	8.62755	1.81052	0.50228	0.97574	0.5414	1.02894	0.54054	3.70804	1.01605	3.10365	0.62112	3.93323	4.5728	2.65624	3.56452	3.56257	4.52588	0.470373	1.09931	0.255876	0.80568	0.41312	0.88214	1.42546	1.17256	0.1592	0.1581	0.1433
	SD		0.779266	0.561889	0.0615952	0.0555353	0.047711	0.0231732	0.152541	0.155592	0.32587	0.0932201	0.533001	0.0251065	0.315586	0.222407	0.229045	0.302634	0.407901	0.378363	0.0585876	0.051775	0.0588894	0.0496412	0.0744271	0.112193	0.140777	0.12537	0.0102367	0.00773499	0.00720208
	Range		1.9558	1.637	0.1512	0.1455	0.1143	0.0527	0.3676	0.4266	0.829911	0.196532	1.45285	0.0483935	0.705274	0.4957	0.442723	0.526059	0.814332	0.756708	0.127807	0.105618	0.141819	0.1301	0.2038	0.2997	0.3346	0.334	0.0183	0.014	0.0141																.
	Minimum		8.142	7.5648	1.7367	0.4216	0.9144	0.5156	0.7747	0.3601	3.4448	0.941319	2.52399	0.593056	3.67071	4.40446	2.40091	3.21507	3.16954	4.14907	0.427618	1.02169	0.177829	0.75	0.3118	0.696	1.1964	0.9766	0.1474	0.153	0.1371
	Maximum		10.0978	9.2018	1.8879	0.5671	1.0287	0.5683	1.1423	0.7867	4.27471	1.13785	3.97684	0.64145	4.37599	4.90016	2.84363	3.74113	3.98387	4.90578	0.555425	1.12731	0.319648	0.8801	0.5156	0.9957	1.531	1.3106	0.1657	0.167	0.1512
	Count (n)		6	6	5	5	5	5	5	5	5	5	5	3	4	4	3	3	3	3	4	4	4	5	5	5	5	5	3	3	3
female	Mean		11.0991	10.8716	2.13562	0.643	1.10476	0.59576	1.20952	0.709	4.50435	1.37201	3.15604	0.761513	4.60987	4.82379	3.30713	4.22543	4.29633	5.12523	0.598387	1.31052	0.291991	0.87286	0.44664	1.03732	1.67892	1.68174	0.20358	0.1736	0.17054
	SD		0.660916	0.659116	0.14028	0.085585	0.0941457	0.0648661	0.0743292	0.155438	0.632024	0.158296	0.393428	0.0723546	0.510875	0.508697	0.555353	0.261178	0.624316	0.380445	0.0969022	0.104839	0.0650886	0.0590875	0.0400335	0.0352625	0.147201	0.227948	0.0249218	0.0294503	0.0220467
	Range		1.4986	1.5799	0.3587	0.2407	0.2488	0.1752	0.1975	0.3333	1.58214	0.370952	0.760218	0.175347	1.37777	1.41175	1.45218	0.538801	1.65156	0.881252	0.214383	0.275413	0.163347	0.1422	0.1111	0.0832	0.3899	0.5708	0.0578	0.066	0.0553
	Minimum		10.2946	10.1143	1.9825	0.5137	1.0097	0.5252	1.0941	0.5373	3.86789	1.17575	2.84235	0.665728	3.77975	4.03699	2.62066	3.99491	3.70747	4.72215	0.480503	1.20431	0.211861	0.835	0.3848	1.0007	1.4884	1.3183	0.1873	0.1435	0.1498
	Maximum		11.7932	11.6942	2.3412	0.7544	1.2585	0.7004	1.2916	0.8706	5.45002	1.5467	3.60257	0.841075	5.15752	5.44873	4.07284	4.53372	5.35902	5.6034	0.694886	1.47973	0.375209	0.9772	0.4959	1.0839	1.8783	1.8891	0.2451	0.2095	0.2051
	Count (n)		5	5	5	5	5	5	5	4	5	5	5	4	5	5	5	4	5	5	5	5	5	5	5	5	5	5	5	5	5
Z. puertoricensis
male	Mean		11.1971	10.9183	2.05455	0.676683	1.0051	0.705367	1.18282	0.95096	4.46984	1.22431	3.67012	1.15713	4.36481	4.55325	3.2735	3.73726	4.24497	4.91132	0.669899	1.24029	0.351224	0.906683	0.4722	1.06352	1.67143	1.26076	0.203533	0.191217	0.179467
	SD		0.598342	0.637962	0.0921004	0.0572828	0.0753592	0.0945545	0.158076	0.122539	0.529529	0.130863	0.541871	0.161472	0.375156	0.459024	0.317108	0.373477	0.307871	0.689662	0.0675054	0.0923863	0.0444577	0.0519517	0.0298024	0.0751652	0.172207	0.398491	0.0257658	0.0173382	0.0245362
	Range		1.5195	1.5068	0.2693	0.1517	0.2045	0.2394	0.4052	0.3334	1.15323	0.359916	1.12547	0.375505	0.858569	1.27143	0.726374	0.866173	0.566667	1.35888	0.186473	0.253024	0.110416	0.1473	0.0864	0.2172	0.4121	0.8808	0.061	0.0445	0.0451																.
	Minimum		10.2191	10.0794	1.8859	0.6001	0.9233	0.6153	0.8985	0.8013	3.73758	1.07633	3.24903	0.931476	3.8094	3.95716	2.83336	3.26292	3.8921	4.16358	0.595168	1.13682	0.289092	0.8217	0.4165	0.9404	1.4542	0.6972	0.1695	0.1676	0.1625
	Maximum		11.7386	11.5862	2.1552	0.7518	1.1278	0.8547	1.3037	1.1347	4.89081	1.43625	4.3745	1.30698	4.66797	5.22859	3.55973	4.1291	4.45876	5.52246	0.78164	1.38985	0.399508	0.969	0.5029	1.1576	1.8663	1.578	0.2305	0.2121	0.2076
	Count (n)		6	6	6	6	6	6	6	5	6	6	5	4	6	6	6	6	3	3	6	6	6	6	6	6	6	5	6	6	3
female	Mean		13.2009	13.0174	2.35977	0.76265	1.16885	0.800433	1.54017	1.13	4.70401	1.3061	3.85962	1.07316	5.02304	5.2795	3.52662	4.04366	4.66131	5.68777	0.790018	1.39005	0.364142	0.9654	0.50345	1.29487	2.17453	1.95157	0.280467	0.256933	0.23648
	SD		0.839047	0.865701	0.120259	0.0561706	0.0928343	0.0831513	0.11693	0.122334	0.306167	0.106192	0.0509189	-	0.396264	0.496323	0.314848	0.436854	0.163546	0.184992	0.0533729	0.0816156	0.0621117	0.0769351	0.0427083	0.131942	0.244441	0.291784	0.0064624	0.0210203	0.0162703
	Range		2.305	2.2454	0.3372	0.1417	0.2343	0.2343	0.3258	0.2901	0.836131	0.241479	0.0934404	-	1.0283	1.38162	0.660232	1.04526	0.443469	0.452231	0.121143	0.234489	0.179875	0.2241	0.12	0.3702	0.5753	0.7564	0.0185	0.0394	0.04
	Minimum		12.025	11.9272	2.126	0.6794	1.0148	0.6782	1.3798	1.0021	4.23405	1.21489	3.80121	1.07316	4.24445	4.30789	3.05699	3.44972	4.42189	5.40028	0.729378	1.29671	0.269154	0.8249	0.4553	1.1411	1.8808	1.6211	0.2711	0.233	0.2121
	Maximum		14.33	14.1726	2.4632	0.8211	1.2491	0.9125	1.7056	1.2922	5.07018	1.45637	3.89465	1.07316	5.27275	5.6895	3.71723	4.49498	4.86535	5.85251	0.850521	1.5312	0.44903	1.049	0.5753	1.5113	2.4561	2.3775	0.2896	0.2724	0.2521
	Count (n)		6	6	6	6	6	6	6	6	5	5	3	1	6	6	4	4	5	5	5	6	6	6	6	6	6	6	6	3	5
Z. renardii
male	Mean		12.0098	11.4193	2.64066	0.85109	1.39478	0.78002	1.55871	1.04705	4.1893	1.25247	4.42041	1.21776	4.47512	4.98742	3.19177	4.04323	4.40579	5.27951	0.948054	1.55031	0.336034	1.01276	0.60554	1.37298	2.41528	2.10942	0.326	0.31355	0.28867
	SD		0.886059	0.800986	0.189645	0.0701089	0.106165	0.0701469	0.121426	0.135314	0.419303	0.0992136	0.55459	0.727128	0.416571	0.461639	0.316303	0.387587	0.572996	0.603782	0.0642886	0.240991	0.0601725	0.0599879	0.0688858	0.0820636	0.153555	0.214111	0.0269573	0.0330643	0.025466
	Range		2.413	2.2098	0.5848	0.2083	0.3848	0.1943	0.3422	0.348	1.41548	0.309667	1.60385	2.10034	1.23472	1.33338	0.923283	1.11722	1.77401	1.59661	0.212905	0.701995	0.17854	0.179	0.2083	0.2603	0.468	0.7036	0.075	0.0889	0.0767																.
	Minimum		10.5708	10.1784	2.2511	0.7423	1.2103	0.6813	1.3729	0.8814	3.50211	1.07954	3.5338	0.416185	3.66461	4.15885	2.59521	3.34164	3.13463	4.37286	0.815851	1.05713	0.242273	0.9132	0.487	1.2135	2.225	1.7704	0.2844	0.254	0.2433
	Maximum		12.9838	12.3882	2.8359	0.9506	1.5951	0.8756	1.7151	1.2294	4.91759	1.38921	5.13765	2.51652	4.89933	5.49223	3.5185	4.45886	4.90864	5.96947	1.02876	1.75912	0.420813	1.0922	0.6953	1.4738	2.693	2.474	0.3594	0.3429	0.32
	Count (n)		10	10	10	10	10	10	9	10	10	10	10	10	10	10	10	10	10	10	10	10	10	10	10	9	10	9	10	10	10
female	Mean		13.2915	12.6896	2.77898	0.895211	1.47548	0.835887	1.66188	1.15941	4.30557	1.39641	4.05592	1.45235	4.75351	5.32142	3.42711	4.19974	4.61949	5.77867	1.01092	1.69637	0.3835	1.04041	0.643689	1.44908	2.81827	2.48334	0.362422	0.398789	0.305356
	SD		0.838881	0.705764	0.192786	0.0940996	0.12527	0.114705	0.144274	0.225521	0.349393	0.0896973	0.438442	0.890221	0.333136	0.310337	0.236903	0.285307	0.343594	0.417949	0.0579655	0.133311	0.06935	0.0487021	0.0418646	0.111924	0.29284	0.371457	0.0273664	0.0359068	0.0260196
	Range		2.1088	1.8916	0.4794	0.261	0.3556	0.2996	0.409	0.7297	0.949667	0.259347	1.1905	2.38686	1.00412	0.99162	0.707329	0.985006	1.08196	1.17508	0.195676	0.418295	0.220205	0.1346	0.16	0.3569	0.9366	1.2859	0.0699	0.1112	0.0685
	Minimum		12.1425	11.7234	2.4867	0.7563	1.2783	0.7316	1.5037	0.8731	3.78036	1.27703	3.5618	0.588198	4.1078	4.72972	3.04893	3.7791	4.09269	5.20098	0.904687	1.40033	0.284262	0.9608	0.5728	1.263	2.3514	1.985	0.3314	0.3505	0.2775
	Maximum		14.2513	13.615	2.9661	1.0173	1.6339	1.0312	1.9127	1.6028	4.73003	1.53637	4.7523	2.97505	5.11191	5.72134	3.75625	4.7641	5.17465	6.37606	1.10036	1.81862	0.504467	1.0954	0.7328	1.6199	3.288	3.2709	0.4013	0.4617	0.346
	Count (n)		9	9	9	9	9	8	9	8	9	9	9	9	9	9	9	9	9	9	8	8	8	9	9	9	9	9	9	9	9
Z. rosulentus
male	Mean		11.9687	10.6244	2.46673	0.809833	1.23673	0.5815	1.256	0.831	6.15593	1.54916	6.37252	1.98332	6.30317	6.44093	4.2864	5.28699	5.51103	7.08788	0.796191	1.66207	0.419124	1.02487	0.467967	1.3121	2.3296	1.71193	0.2064	0.17495	0.1854
	SD		0.454022	1.0474	0.111436	0.102878	0.0600197	0.0460931	0.02261	0.209342	0.331414	0.117578	0.227449	-	0.243995	0.27478	0.0309298	0.124037	0.2793	0.329938	0.00758651	0.0500165	0.0490092	0.0652871	0.048382	0.119347	0.112215	0.575953	0.0177181	0.011243	0.00890955
	Range		0.9036	2.0327	0.2146	0.1968	0.1188	0.0921	0.0451	0.4083	0.61768	0.234371	0.441616	-	0.434625	0.51846	0.0437413	0.175415	0.39499	0.466603	0.0148741	0.0960305	0.0956661	0.1289	0.0838	0.2153	0.2133	1.1334	0.035	0.0159	0.0126																.
	Minimum		11.491	9.7542	2.3768	0.6941	1.1823	0.5366	1.2344	0.6001	5.9165	1.43751	6.12021	1.98332	6.14991	6.23431	4.26453	5.19928	5.31353	6.85458	0.787888	1.62215	0.377453	0.9544	0.4121	1.1747	2.2028	1.2046	0.1905	0.167	0.1791
	Maximum		12.3946	11.7869	2.5914	0.8909	1.3011	0.6287	1.2795	1.0084	6.53418	1.67189	6.56182	1.98332	6.58454	6.75277	4.30827	5.3747	5.70852	7.32118	0.802762	1.71818	0.473119	1.0833	0.4959	1.39	2.4161	2.338	0.2255	0.1829	0.1917
	Count (n)		3	3	3	3	3	3	3	3	3	3	3	1	3	3	2	2	2	2	3	3	3	3	3	3	3	3	3	2	2
Z. ruficeps
male	Mean		14.9266	14.1193	2.84195	0.8979	1.36805	1.04501	2.00405	1.60573	5.8713	1.96813	5.12052	1.67452	5.77101	6.23389	4.24287	4.95218	5.62877	6.66239	1.14469	1.6111	0.429306	1.28688	0.76662	2.08897	3.85439	2.86911	0.42462	0.40129	0.34945
	SD		1.40685	1.42328	0.316008	0.105783	0.158862	0.294874	0.361163	1.60349	0.778887	0.223093	0.971238	0.358711	0.722537	0.703695	0.449835	0.600296	0.666639	0.921928	0.103078	0.137722	0.0694064	0.143508	0.0583771	0.24484	0.513242	0.413744	0.0404293	0.0412279	0.0372899
	Range		3.5865	3.7198	1.1519	0.3785	0.4642	1.0497	1.2445	5.3422	2.39878	0.711826	2.94204	0.93865	2.46892	2.27592	1.52497	2.13755	2.06349	3.04754	0.302266	0.452133	0.211019	0.3842	0.183	0.6745	1.3532	1.4446	0.1213	0.1347	0.1016																.
	Minimum		13.2423	12.3095	2.4422	0.6915	1.0446	0.741	1.1354	0.7792	4.87202	1.69249	4.175	1.31361	4.75488	5.16983	3.49166	3.78792	4.25089	5.20627	1.02702	1.42072	0.330452	1.1049	0.6508	1.7614	3.1712	2.3222	0.3518	0.3225	0.2915
	Maximum		16.8288	16.0293	3.5941	1.07	1.5088	1.7907	2.3799	6.1214	7.2708	2.40432	7.11704	2.25226	7.2238	7.44575	5.01663	5.92547	6.31438	8.25381	1.32929	1.87285	0.541472	1.4891	0.8338	2.4359	4.5244	3.7668	0.4731	0.4572	0.3931
	Count (n)		10	10	10	10	10	10	10	10	9	9	9	7	10	10	10	10	10	10	9	9	9	10	10	10	10	10	10	10	10
female	Mean		17.8352	16.7822	3.09726	1.11013	1.50898	0.969833	2.54573	1.23111	6.07113	2.01408	5.02417	1.66852	6.45668	6.81342	4.67821	5.34902	6.16401	7.32932	1.24995	1.69257	0.511766	1.40434	0.8624	2.40183	4.85437	4.53333	0.516012	0.475456	0.381844
	SD		1.14197	1.11079	0.193585	0.12291	0.117059	0.0940396	0.194852	0.171027	0.441761	0.132879	1.30354	0.475556	0.445508	0.461609	0.3449	0.399331	0.536487	0.437621	0.0988828	0.0646385	0.0522543	0.0880892	0.0763072	0.14022	0.316765	0.425888	0.060928	0.0447913	0.0394455
	Range		3.5509	3.6075	0.6165	0.442	0.367	0.3189	0.6083	0.4776	1.35976	0.363144	3.76141	0.920154	1.28072	1.152	1.0732	1.26525	1.50251	1.38481	0.26071	0.208794	0.136127	0.2929	0.2546	0.3956	1.0661	1.2147	0.1803	0.1346	0.134
	Minimum		16.4611	15.2406	2.8531	0.929	1.3742	0.774	2.2663	0.9963	5.32363	1.82846	3.58216	1.13897	5.89826	6.17011	4.1447	4.75914	5.48175	6.59516	1.13572	1.61672	0.449287	1.3315	0.7347	2.2091	4.3739	3.925	0.4515	0.4267	0.3232
	Maximum		20.012	18.8481	3.4696	1.371	1.7412	1.0929	2.8746	1.4739	6.68339	2.1916	7.34357	2.05912	7.17898	7.3221	5.2179	6.02438	6.98426	7.97998	1.39643	1.82551	0.585414	1.6244	0.9893	2.6047	5.44	5.1397	0.6318	0.5613	0.4572
	Count (n)		9	9	9	9	9	9	9	8	8	7	6	3	8	8	9	9	9	9	8	8	8	9	9	9	9	9	8	9	9
Z. russulumus
male	Mean		13.1357	11.9905	2.6957	0.786983	1.34388	0.745883	1.5674	0.947833	7.03642	1.85034	8.35403	0.771535	6.49213	6.82935	4.84446	5.91598	6.53305	7.97196	0.900027	1.76779	0.409466	1.22078	0.557117	1.4624	2.45185	1.84042	0.208617	0.243417	0.245733
	SD		0.628289	0.62303	0.169006	0.100419	0.0604365	0.100289	0.126175	0.105449	0.753082	0.112496	0.897688	-	0.310961	0.342122	0.272055	0.581783	0.397813	0.283881	0.0298012	0.167656	0.109841	0.0567394	0.0463664	0.0247159	0.168062	0.129645	0.0150678	0.0209622	0.026537
	Range		1.7316	1.9025	0.494	0.2731	0.1669	0.2584	0.3614	0.2775	2.05628	0.254352	2.49002	-	0.694558	0.960352	0.740758	1.69278	0.929897	0.792763	0.0786666	0.419104	0.263914	0.1569	0.1302	0.0603	0.4312	0.3582	0.0414	0.0495	0.0654																.
	Minimum		12.206	11.0947	2.4473	0.661	1.2688	0.548	1.409	0.7957	5.60609	1.71572	7.16189	0.771535	6.10502	6.48801	4.52469	4.81212	6.0578	7.44322	0.865124	1.55349	0.257957	1.1106	0.4699	1.4351	2.2428	1.623	0.1911	0.2165	0.207
	Maximum		13.9376	12.9972	2.9413	0.9341	1.4357	0.8064	1.7704	1.0732	7.66237	1.97008	9.65191	0.771535	6.79958	7.44837	5.26545	6.5049	6.9877	8.23598	0.943791	1.9726	0.521871	1.2675	0.6001	1.4954	2.674	1.9812	0.2325	0.266	0.2724
	Count (n)		6	6	6	6	6	6	6	6	6	5	5	1	6	6	6	6	6	6	6	6	6	6	6	5	6	6	6	6	6
female	Mean		18.2317	16.5394	3.1628	1.1141	1.46352	0.841	2.10262	1.2846	8.87638	2.12523	8.7785	2.55371	7.79417	8.49288	5.86849	7.35878	7.94997	9.89351	1.20712	2.28648	0.511129	1.35266	0.63294	1.7253	3.91336	2.97462	0.27914	0.374	0.30656
	SD		0.726491	0.728466	0.212783	0.0500169	0.0931008	0.0790387	0.140546	0.262829	0.169587	0.0939278	0.30906	0.106144	0.422849	0.442862	0.202172	0.283323	0.342839	0.675595	0.0724204	0.0609628	0.0874994	0.0781041	0.0738192	0.0864535	0.387156	0.51175	0.0190973	0.0418714	0.0278769
	Range		1.8713	1.8942	0.5156	0.1225	0.2432	0.1785	0.2997	0.6311	0.374482	0.222484	0.858829	0.185041	1.07524	1.067	0.439079	0.63708	0.809767	1.56096	0.195299	0.160242	0.17118	0.2077	0.1848	0.2032	1.0483	1.2071	0.0514	0.0883	0.0667
	Minimum		17.5165	15.5099	2.8613	1.0522	1.3417	0.7423	1.9609	0.9284	8.65004	2.01082	8.32767	2.49123	7.1107	7.78149	5.67683	7.0036	7.59309	8.94226	1.11503	2.22857	0.420325	1.2408	0.5321	1.6231	3.3947	2.5553	0.2502	0.3308	0.2813
	Maximum		19.3878	17.4041	3.3769	1.1747	1.5849	0.9208	2.2606	1.5595	9.02452	2.23331	9.1865	2.67627	8.18594	8.84849	6.11591	7.64068	8.40286	10.5032	1.31033	2.38881	0.591505	1.4485	0.7169	1.8263	4.443	3.7624	0.3016	0.4191	0.348
	Count (n)		5	5	5	4	5	5	5	5	4	5	5	3	5	5	5	4	5	5	5	5	4	5	5	4	5	5	5	5	5
Z. spatulosus
male	n=1		13.1686	11.6427	2.2625	0.696	1.11	0.6909	1.4364	1.0198	5.15451	5.15451	0	0	6.04715	6.30657	4.02107	4.91956	5.56685	6.92442	0.623382	1.50812	0.41256	1.0649	0.5067	1.2814	2.3514	1.5989	0.1899	0.2057	0.1969
Z. sphegeus
female	Mean		14.5743	13.4957	2.78363	0.91345	1.56745	0.794133	1.8515	0.8856	7.22974	1.73432	7.79868	1.37021	6.68545	6.92202	4.85981	5.53722	6.25954	7.53945	0.924385	2.1399	0.49203	1.19167	0.525333	1.57903	3.60023	2.5438	0.248	0.2921	0.2246
	SD		0.382798	0.457681	0.0541754	0.123532	0.0228395	0.0711864	0.13717	0.235479	0.629691	0.0117179	1.52515	0.574391	0.484471	0.350345	0.422136	0.377895	0.508284	0.449231	0.0742254	0.0466478	0.0266823	0.0303517	0.0798436	0.107781	0.21724	0.355618	0.0282843	0.00670895	0.0199997
	Range		0.7652	0.8592	0.0966	0.1747	0.0323	0.1411	0.2724	0.4387	0.890518	0.0165717	2.15689	0.812311	0.685146	0.495462	0.811151	0.7548	0.960157	0.790168	0.137965	0.0908176	0.0494162	0.0603	0.1524	0.2012	0.4337	0.71	0.04	0.0127	0.0393
	Minimum		14.1846	13.1572	2.7495	0.8261	1.5513	0.7181	1.7247	0.7157	6.78448	1.72604	6.72024	0.964055	6.34287	6.67429	4.52183	5.14865	5.87586	7.26781	0.839582	2.08832	0.473138	1.1595	0.4629	1.4561	3.3909	2.1767	0.228	0.287	0.2071
	Maximum		14.9498	14.0164	2.8461	1.0008	1.5836	0.8592	1.9971	1.1544	7.675	1.74261	8.87712	1.77637	7.02802	7.16975	5.33298	5.90345	6.83601	8.05798	0.977547	2.17914	0.522554	1.2198	0.6153	1.6573	3.8246	2.8867	0.268	0.2997	0.2464
	Count (n)		3	3	3	2	2	3	3	3	2	2	2	2	2	2	3	3	3	3	3	3	3	3	3	3	3	3	2	3	3
Z. subimpressus
male	Mean		12.1169	11.8791	2.3968	0.670567	1.28587	0.728175	1.2529	0.839667	4.91572	1.26037	4.42623	0.967696	4.80847	5.04838	3.45497	3.83769	4.53505	5.41145	0.811936	1.45528	0.375662	0.906767	0.445767	1.1787	2.04535	1.5197	0.231125	0.217625	0.215225
	SD		0.38464	0.433136	0.0724522	0.0420709	0.0496055	0.0716869	0.019407	0.160731	0.616468	0.0705738	0.4869	0.779752	0.265792	0.356994	0.164574	0.267895	0.487828	0.530604	0.0753534	0.0665605	0.0429503	0.0175021	0.0163323	0.0723673	0.225689	0.0674223	0.0181447	0.0147511	0.0148417
	Range		0.814	0.9474	0.1505	0.0812	0.1047	0.1734	0.0388	0.2812	1.34322	0.149949	1.14848	1.10274	0.503013	0.746413	0.339278	0.549012	1.05586	1.17778	0.14674	0.128074	0.0803455	0.0336	0.0311	0.1677	0.5289	0.1549	0.0369	0.0298	0.0362																.
	Minimum		11.5875	11.2998	2.3101	0.6236	1.2345	0.6375	1.2338	0.6541	4.03203	1.15844	3.81807	0.416329	4.55201	4.73135	3.27045	3.53737	4.00869	4.74291	0.728649	1.40173	0.326716	0.8928	0.4331	1.0985	1.8371	1.4491	0.2108	0.2019	0.1981
	Maximum		12.4015	12.2472	2.4606	0.7048	1.3392	0.8109	1.2726	0.9353	5.37525	1.30839	4.96654	1.51906	5.05502	5.47777	3.60973	4.08638	5.06455	5.9207	0.875389	1.5298	0.407062	0.9264	0.4642	1.2662	2.366	1.604	0.2477	0.2317	0.2343
	Count (n)		4	4	4	3	4	4	3	3	4	4	4	2	4	4	4	4	4	4	3	3	3	3	3	4	4	4	4	4	4
female	Mean		15.0574	14.9498	2.81342	0.90474	1.47752	0.87494	1.74268	1.39238	5.57227	1.43167	3.92525	1.83831	5.98786	6.16687	4.36061	4.58298	5.7594	5.92927	0.950665	1.81378	0.487121	1.03684	0.54944	1.39066	2.75156	2.60552	0.356033	0.321333	0.256567
	SD		0.685806	0.704775	0.113458	0.109107	0.0626519	0.0520314	0.122696	0.15251	0.419952	0.110372	1.31167	-	0.531922	0.465402	0.331998	0.370163	0.573282	0.354375	0.0916159	0.123949	0.0618332	0.0494124	0.0177723	0.119906	0.1508	0.402817	0.0131561	0.0114823	0.0387197
	Range		1.7228	1.7641	0.268	0.2578	0.1289	0.1143	0.3411	0.3524	1.00517	0.237333	3.02999	-	0.990321	0.862375	0.593647	0.686146	1.03581	0.698131	0.248435	0.310038	0.139799	0.1264	0.0401	0.2979	0.3684	0.9943	0.026	0.0223	0.0768
	Minimum		14.3567	14.2373	2.6835	0.769	1.4034	0.8033	1.5525	1.1963	5.11415	1.32828	2.48902	1.83831	5.60489	5.8368	4.14965	4.32016	5.38341	5.54492	0.853182	1.65324	0.41417	0.9906	0.5321	1.1982	2.4955	2.1559	0.3442	0.3086	0.2153
	Maximum		16.0795	16.0014	2.9515	1.0268	1.5323	0.9176	1.8936	1.5487	6.11932	1.56561	5.51901	1.83831	6.59521	6.69918	4.7433	5.0063	6.41923	6.24306	1.10162	1.96328	0.55397	1.117	0.5722	1.4961	2.8639	3.1502	0.3702	0.3309	0.2921
	Count (n)		5	5	5	5	5	5	5	4	4	4	4	1	3	3	3	3	3	3	5	5	4	5	5	5	5	5	3	3	3
Z. sulcicollis
male	Mean		18.1042	16.6115	3.61088	1.158	1.8617	1.15532	2.18336	1.34786	7.05055	2.61444	6.82246	2.11853	7.16846	7.58948	4.90673	5.73113	6.89643	8.16757	1.48112	2.06597	0.514308	1.46002	0.81558	2.18236	3.85774	3.56146	0.59906	0.51902	0.42392
	SD		1.91462	1.69812	0.289219	0.113739	0.151645	0.142445	0.376435	0.26075	1.32638	0.497073	1.56068	0.33591	0.974442	1.2148	0.656369	0.918964	0.824137	1.06682	0.151044	0.208811	0.0845308	0.118453	0.0960005	0.283661	0.465199	0.759301	0.0707971	0.0589763	0.0446561
	Range		5.4051	4.8889	0.7474	0.2648	0.3994	0.3576	0.8617	0.6262	3.66371	1.11609	4.05735	0.8043	2.65697	3.22066	1.80931	2.42412	2.07019	3.00555	0.374025	0.536186	0.212979	0.3207	0.2374	0.715	1.143	1.9139	0.1855	0.1568	0.1061																.
	Minimum		14.8552	13.9649	3.1674	1.0141	1.6104	0.9055	1.6535	1.0496	5.36154	1.97707	4.40731	1.77471	5.61261	5.54104	4.09278	4.72111	5.48433	6.58372	1.2267	1.7238	0.391527	1.2643	0.67	1.6853	3.1013	2.5203	0.4775	0.4229	0.3645
	Maximum		20.2603	18.8538	3.9148	1.2789	2.0098	1.2631	2.5152	1.6758	9.02525	3.09316	8.46466	2.57901	8.26958	8.7617	5.90209	7.14522	7.55452	9.58927	1.60072	2.25999	0.604506	1.585	0.9074	2.4003	4.2443	4.4342	0.663	0.5797	0.4706
	Count (n)		9	9	5	5	5	5	5	5	8	6	5	5	5	5	5	5	5	5	5	5	5	5	5	5	5	5	5	5	5
female	Mean		21.4056	20.5875	4.28956	1.39064	2.21898	1.41142	2.658	1.54652	7.93174	2.77039	7.42577	-	8.03284	8.62364	5.76082	6.28751	7.95072	8.72492	1.80242	2.29851	0.699816	1.63586	0.98565	2.53072	4.88654	5.02258	0.72226	0.73548	0.481825
	SD		0.556746	0.442123	0.132035	0.0919647	0.0908833	0.0797012	0.110384	0.321239	0.0659448	0.179838	1.49658	-	0.396287	0.47056	0.177148	0.237257	0.397293	0.35001	0.0589198	0.029793	0.116457	0.0907186	0.0542	0.088765	0.185116	0.957969	0.0336831	0.0589368	0.0360711
	Range		1.3208	1.1119	0.3055	0.221	0.2109	0.1917	0.2755	0.7316	0.124615	0.329608	2.83825	-	0.847827	1.18377	0.453336	0.630461	0.869927	0.82013	0.127992	0.069634	0.208786	0.1981	0.129	0.2058	0.5188	2.4854	0.0686	0.1435	0.0768
	Minimum		20.5899	20.2228	4.1192	1.2503	2.1177	1.3284	2.4677	1.282	7.85696	2.56403	6.28102	-	7.60292	8.10123	5.60305	6.04634	7.45425	8.23411	1.7462	2.2634	0.625224	1.5227	0.9105	2.4225	4.6456	3.7554	0.6909	0.6769	0.4312
	Maximum		21.9107	21.3347	4.4247	1.4713	2.3286	1.5201	2.7432	2.0136	7.98158	2.89364	9.11927	-	8.45075	9.285	6.05639	6.6768	8.32418	9.05424	1.87419	2.33304	0.834011	1.7208	1.0395	2.6283	5.1644	6.2408	0.7595	0.8204	0.508
	Count (n)		5	5	5	5	5	4	5	4	3	3	3	-	5	5	5	5	4	4	4	4	3	5	4	5	5	5	5	5	4
Z. tetracanthus
male	Mean		12.3554	11.7218	2.65424	0.8443	1.39657	0.75742	1.37674	0.95002	5.08212	1.30143	4.5685	1.01042	5.08399	5.60701	3.39866	4.02994	5.1068	5.97322	0.758463	1.71095	0.27903	1.01098	0.5828	1.306	2.09389	1.78784	0.29793	0.25728	0.22745
	SD		0.771779	0.623999	0.172725	0.114373	0.12423	0.0926898	0.121754	0.201712	0.712758	0.134145	0.9961	0.150981	0.521562	0.55257	0.357251	0.437922	0.41987	0.588964	0.0583744	0.218582	0.0549665	0.0594384	0.0817676	0.0716078	0.219886	0.217436	0.0158578	0.0254116	0.0197449
	Range		2.3902	1.5913	0.6083	0.3442	0.3803	0.2737	0.3619	0.5734	2.14152	0.394934	3.46242	0.484679	1.42578	1.46143	0.95186	1.29501	1.18881	1.67189	0.179809	0.753178	0.178655	0.1968	0.2762	0.1924	0.611	0.6459	0.0534	0.0686	0.0661																.
	Minimum		11.3417	11.0382	2.3698	0.6591	1.2205	0.5994	1.2027	0.6458	3.99304	1.10957	2.98057	0.792811	4.25265	4.80666	2.96094	3.4045	4.50607	5.2683	0.681387	1.17462	0.179046	0.9398	0.4699	1.2338	1.8046	1.543	0.2698	0.2203	0.2044
	Maximum		13.7319	12.6295	2.9781	1.0033	1.6008	0.8731	1.5646	1.2192	6.13456	1.5045	6.44299	1.27749	5.67844	6.26809	3.9128	4.69951	5.69488	6.9402	0.861196	1.9278	0.357701	1.1366	0.7461	1.4262	2.4156	2.1889	0.3232	0.2889	0.2705
	Count (n)		10	10	10	10	10	10	10	10	10	10	9	8	10	10	10	10	9	9	10	10	10	10	10	10	10	10	10	10	10
female	Mean		14.4269	14.2173	3.0289	0.99358	1.57888	0.8738	1.56745	1.00405	5.93843	1.82112	4.59494	1.28109	5.82062	6.28672	4.03666	4.68564	5.7209	6.77403	0.875176	1.9063	0.406725	1.10929	0.62096	1.50096	2.59404	2.34314	0.36253	0.33108	0.25849
	SD		0.658847	0.930607	0.133993	0.0873216	0.0829453	0.123648	0.15206	0.253243	0.449853	0.105295	0.505204	0.216209	0.296399	0.368421	0.242599	0.321922	0.580173	0.487616	0.0785501	0.149209	0.127483	0.0693214	0.0413079	0.0942326	0.230005	0.33822	0.0387575	0.0274355	0.0278857
	Range		2.4136	3.5459	0.4826	0.2439	0.301	0.3957	0.5563	0.6344	1.52584	0.314309	1.47426	0.569338	1.00457	1.17706	0.785862	1.01254	1.80825	1.44747	0.27348	0.414883	0.415431	0.2152	0.1227	0.2705	0.7036	1.0097	0.1117	0.099	0.1061
	Minimum		13.2207	12.7692	2.7426	0.9131	1.3793	0.7181	1.3392	0.6674	5.32278	1.66836	3.9524	1.06122	5.42559	5.90036	3.63618	4.26499	4.74694	6.17264	0.731855	1.64442	0.236019	0.9887	0.5708	1.4097	2.2422	1.8675	0.308	0.282	0.1968
	Maximum		15.6343	16.3151	3.2252	1.157	1.6803	1.1138	1.8955	1.3018	6.84862	1.98267	5.42666	1.63056	6.43016	7.07742	4.42205	5.27753	6.55519	7.62011	1.00533	2.0593	0.65145	1.2039	0.6935	1.6802	2.9458	2.8772	0.4197	0.381	0.3029
	Count (n)		10	10	10	10	10	10	10	10	9	9	8	6	10	10	10	10	10	10	10	10	10	10	10	10	10	9	10	10	10
Z. truxali
male	Mean		11.9055	10.7831	2.5246	0.786125	1.25525	0.675	1.55578	0.85375	6.06971	1.65506	6.76589	2.19748	5.59626	6.14641	4.2834	5.04532	5.50076	6.61528	0.875738	1.65951	0.335028	1.09905	0.5151	1.3768	2.42315	1.4645	0.188425	0.186975	0.176525
	SD		0.272635	0.422528	0.0897066	0.0471299	0.123934	0.131331	0.0993022	0.102068	0.277117	0.0601828	0.383654	-	0.383117	0.268252	0.21704	0.0309635	0.216405	0.369049	0.0675937	0.110262	0.0993661	0.0328492	0.0669718	0.025669	0.101946	0.153158	0.0109412	0.0112885	0.00815736
	Range		0.661	0.9258	0.2108	0.1105	0.221	0.301	0.2393	0.2407	0.654536	0.144168	0.542568	-	0.907342	0.580455	0.50574	0.0688411	0.509139	0.826917	0.159812	0.239715	0.172439	0.0717	0.1485	0.0623	0.2456	0.355	0.0241	0.0248	0.0171																.
	Minimum		11.5881	10.4769	2.4092	0.729	1.1487	0.5639	1.4485	0.741	5.7134	1.57837	6.49461	2.19748	5.16618	5.7526	3.98715	5.01171	5.25596	6.09381	0.800019	1.58358	0.298129	1.0535	0.4642	1.3474	2.314	1.2986	0.1797	0.1752	0.1702
	Maximum		12.2491	11.4027	2.62	0.8395	1.3697	0.8649	1.6878	0.9817	6.36794	1.72254	7.03718	2.19748	6.07353	6.33305	4.49289	5.08055	5.7651	6.92073	0.959831	1.8233	0.470568	1.1252	0.6127	1.4097	2.5596	1.6536	0.2038	0.2	0.1873
	Count (n)		4	4	4	4	4	4	4	4	4	4	2	1	4	4	4	4	4	4	4	4	4	4	4	4	4	4	4	4	4
female	Mean		14.9643	13.8168	2.85952	0.82918	1.50418	0.71872	1.90206	1.1938	7.15437	1.77862	6.22881	1.86835	6.7018	7.16669	4.90449	5.95748	6.21829	7.59828	1.02866	1.97203	0.408563	1.17994	0.5179	1.6718	3.4139	2.05082	0.23038	0.28182	0.20508
	SD		0.21616	0.138658	0.0761889	0.089592	0.0418507	0.031224	0.132631	0.0671486	0.208993	0.0693622	1.29459	0.121318	0.199874	0.164677	0.149216	0.220944	0.176953	0.430073	0.0667818	0.0400095	0.0582655	0.0361357	0.0752552	0.118222	0.238626	0.647471	0.0208214	0.0201461	0.0126593
	Range		0.6051	0.3575	0.1676	0.1829	0.108	0.068	0.3696	0.1561	0.478871	0.173891	2.91045	0.239187	0.415168	0.450035	0.406503	0.517866	0.456085	0.931436	0.146997	0.106008	0.152015	0.0812	0.2038	0.3061	0.5748	1.531	0.0496	0.0483	0.0343
	Minimum		14.6514	13.582	2.754	0.7328	1.4611	0.6966	1.7386	1.1215	6.96316	1.67494	4.36223	1.76053	6.45626	6.94461	4.70095	5.71803	5.95705	7.12542	0.957739	1.92689	0.332321	1.1799	0.3975	1.4687	2.9914	0.9468	0.207	0.2496	0.1917
	Maximum		15.2565	13.9395	2.9216	0.9157	1.5691	0.7646	2.1082	1.2776	7.44203	1.84883	7.27267	1.99971	6.87143	7.39464	5.10745	6.2359	6.41313	8.05686	1.10474	2.0329	0.484336	1.2611	0.6013	1.7748	3.5662	2.4778	0.2566	0.2979	0.226
	Count (n)		5	5	5	5	5	5	5	5	5	5	4	3	5	5	5	5	5	5	5	5	5	5	5	5	5	5	5	5	5
Z. umbraculoides
	Mean		15.0281	14.1591	2.62142	0.8263	1.28872	0.677575	2.19612	1.05282	6.00249	2.01483	5.09947	-	5.57895	5.68065	3.79472	4.72363	5.81018	7.17949	1.09482	1.41626	0.354892	1.35683	0.721525	1.71037	3.7314	1.89403	0.327525	0.356875	0.2878
	Standard Deviation		0.741512	0.530611	0.127131	0.021539	0.0871861	0.143862	0.0861137	0.25299	0.21528	0.0268382	-	-	0.0700863	0.594437	0.601857	0.189338	0.259121	0.166271	0.113526	0.0915678	0.103835	0.0414498	0.0226696	0.104248	0.205456	0.722797	0.0293313	0.052484	0.0355628
	Range		1.7157	1.1239	0.266	0.0508	0.2057	0.3422	0.1886	0.515	0.400447	0.0379549	0	-	0.142035	1.32057	1.3035	0.46004	0.558181	0.379492	0.253543	0.194324	0.215286	0.094	0.0476	0.2292	0.4274	1.6714	0.0628	0.122	0.0757																.
	Minimum		14.031	13.4576	2.5051	0.7963	1.1811	0.4782	2.1304	0.7474	5.84794	1.99585	5.09947	-	5.50095	4.80468	2.91416	4.50879	5.45785	6.97119	0.940442	1.32166	0.294807	1.3227	0.6877	1.6104	3.5077	0.8578	0.2877	0.2876	0.2501
	Maximum		15.7467	14.5815	2.7711	0.8471	1.3868	0.8204	2.319	1.2624	6.24838	2.03381	5.09947	-	5.64299	6.12525	4.21767	4.96883	6.01603	7.35068	1.19398	1.51598	0.510094	1.4167	0.7353	1.8396	3.9351	2.5292	0.3505	0.4096	0.3258
	Count		4	4	4	4	4	4	4	4	3	2	1	-	4	4	4	4	4	4	4	4	4	4	4	4	4	4	4	4	4
Z. umbraculus
	Mean		14.4848	13.8862	2.58423	0.814267	1.2334	0.8365	1.9698	1.02993	5.66992	2.07302	4.87305	-	5.62217	5.69924	4.09135	4.56474	5.64737	6.31575	1.04502	1.4906	0.326857	1.25427	0.636033	1.74263	3.34053	2.0195	0.3499	0.349233	0.303533
	Standard Deviation		0.204861	0.497559	0.109643	0.0403758	0.117462	0.101474	0.165917	0.106466	0.342655	0.115096	0.310826	-	0.22965	0.397565	0.325815	0.143591	0.232763	0.235414	0.18089	0.0321847	0.0261105	0.0462078	0.0296921	0.0334709	0.203777	0.154074	0.0279	0.0123614	0.0165098
	Range		0.388	0.9817	0.2038	0.0571	0.2152	0.1856	0.3068	0.2057	0.666765	0.224755	0.439575	-	0.422175	0.75519	0.565304	0.276696	0.435419	0.420035	0.316937	0.059708	0.0458862	0.0908	0.0578	0.0635	0.3893	0.2979	0.0558	0.0235	0.0318																.
	Minimum		14.3288	13.3483	2.5057	0.8414	1.0986	0.72	1.8529	0.9112	5.38225	1.94628	4.65327	-	5.4633	5.24981	3.71513	4.44859	5.38212	6.04432	0.836186	1.45381	0.311111	1.2039	0.6032	1.717	3.1807	1.8478	0.322	0.3397	0.2902
	Maximum		14.7168	14.33	2.7095	0.8985	1.3138	0.9056	2.1597	1.1169	6.04902	2.17103	5.09284	-	5.88548	6.005	4.28044	4.72528	5.81754	6.46436	1.15312	1.51351	0.356997	1.2947	0.661	1.7805	3.57	2.1457	0.3778	0.3632	0.322
	Count		3	3	3	3	3	3	3	3	3	3	2	-	3	3	3	3	3	3	3	3	3	3	3	3	3	3	3	3	3
Z. vagans
male	Mean		13.7081	10.5003	2.53417	0.707167	1.30155	0.624017	1.5512	1.0544	6.3205	1.75477	6.17063	1.88242	6.01454	6.36916	4.4186	5.3118	5.75322	6.67514	1.05783	1.57624	0.390005	1.08425	0.5407	1.511	2.7141	2.06978	0.217917	0.243767	0.24778
	SD		1.18685	0.658974	0.158017	0.0691549	0.197258	0.118279	0.144504	0.115824	0.518231	0.0950726	0.585277	0.299919	0.19612	0.274394	0.37677	0.422314	0.522854	1.11789	0.0629766	0.0735823	0.0761292	0.050371	0.0501821	0.137394	0.141029	0.334303	0.0301158	0.0242557	0.0289901
	Range		3.422	1.7418	0.3842	0.1867	0.4928	0.3181	0.3607	0.2654	1.29648	0.235433	1.70637	0.744352	0.481373	0.704902	0.959032	1.11725	1.42336	2.84487	0.172137	0.206157	0.186231	0.1328	0.1334	0.3334	0.3855	0.7283	0.0838	0.0667	0.0685																.
	Minimum		11.2922	9.8336	2.392	0.6191	1.0528	0.5106	1.3951	0.9233	5.60041	1.65202	5.40952	1.44913	5.76064	5.94018	3.79404	4.71745	4.89625	5.0111	0.993353	1.47533	0.293422	1.0204	0.482	1.3081	2.5038	1.7621	0.1829	0.2083	0.2204
	Maximum		14.7142	11.5754	2.7762	0.8058	1.5456	0.8287	1.7558	1.1887	6.8969	1.88745	7.11589	2.19348	6.24201	6.64508	4.75307	5.8347	6.31961	7.85598	1.16549	1.68149	0.479653	1.1532	0.6154	1.6415	2.8893	2.4904	0.2667	0.275	0.2889
	Count (n)		7	7	6	6	6	6	6	6	7	7	7	5	6	6	6	6	5	5	6	6	6	6	6	6	6	6	6	6	5
Z. varius
male	Mean		10.1136	8.8513	2.1018	0.5969	1.1569	0.4998	1.2763	0.7919	3.97822	1.17946	5.75471	-	5.00723	5.4337	3.79409	4.4266	4.80454	5.38356	0.815436	1.4135	0.309588	0.9245	0.386	1.0776	2.3952	1.4192	0.1695	0.1683	0.1664
female	Mean		13.8719	12.8422	2.8426	0.8868	1.40975	0.65815	1.7675	1.2148	6.26935	1.54311	6.05347	2.00648	6.28912	6.75982	4.57992	5.65033	6.20529	7.38752	1.0218	1.8965	0.390198	1.21695	0.6099	1.60625	3.4808	2.2774	0.2467	0.2473	0.2181
	SD		0.224011	0.40595	0.122612	0.163907	0.0108187	0.0488611	0.0526087	0.00353553	0.215707	0.0387963	0.147701	0.0913628	0.0609806	0.0769925	0.128389	0.307171	0.133783	0.0770444	0.00674939	0.0733365	0.018526	0.031042	0.0354968	0.0678115	0.128835	0.212415	0.0264458	0.0121622	0.00311127
	Range		0.3168	0.5741	0.1734	0.2318	0.0153	0.0691	0.0744	0.005	0.305055	0.0548662	0.208881	0.129206	0.0862395	0.108884	0.18157	0.434405	0.189198	0.108957	0.00954508	0.103713	0.0261997	0.0439	0.0502	0.0959	0.1822	0.3004	0.0374	0.0172	0.0044
	Minimum		13.7135	12.5552	2.7559	0.7709	1.4021	0.6236	1.7303	1.2123	6.11682	1.51568	5.94903	1.94188	6.246	6.70538	4.48913	5.43313	6.11069	7.33304	1.01702	1.84464	0.377099	1.195	0.5848	1.5583	3.3897	2.1272	0.228	0.2387	0.2159
	Maximum		14.0303	13.1293	2.9293	1.0027	1.4174	0.6927	1.8047	1.2173	6.42188	1.57054	6.15791	2.07108	6.33224	6.81426	4.6707	5.86753	6.29989	7.44199	1.02657	1.94836	0.403298	1.2389	0.635	1.6542	3.5719	2.4276	0.2654	0.2559	0.2203
	Count (n)		2	2	2	2	2	2	2	2	2	2	2	2	2	2	2	2	2	2	2	2	2	2	2	2	2	2	2	2	2
Z. versicolor
male	Mean		12.2551	11.7324	2.5349	0.709817	1.39338	0.704983	1.58198	0.812783	6.06537	1.75833	5.32039	1.85773	5.50579	5.79215	3.81374	4.7451	5.08924	6.28702	0.838578	1.67799	0.362559	1.07147	0.4486	1.35622	2.53907	1.92682	0.21958	0.22276	0.20904
	SD		0.51269	0.516197	0.18886	0.177496	0.0705101	0.0587414	0.0709415	0.179955	0.282927	0.0802682	0.432171	0.283094	0.198171	0.330521	0.509901	0.394696	0.343972	0.440616	0.0431052	0.0903158	0.0898311	0.0658287	0.0696507	0.0572049	0.109063	0.191124	0.0325848	0.0199574	0.0306402
	Range		1.3506	1.5386	0.5785	0.5442	0.1766	0.1639	0.2133	0.4457	0.776822	0.212041	0.999944	0.52951	0.476024	0.867723	1.37796	1.08618	0.827061	0.861248	0.122352	0.243645	0.207724	0.1803	0.193	0.16	0.282	0.5925	0.0915	0.0514	0.0807																.
	Minimum		11.5926	10.9893	2.2574	0.4261	1.3131	0.6077	1.4891	0.5766	5.78571	1.66958	4.83676	1.53511	5.29235	5.31838	3.13933	4.11547	4.78626	5.92439	0.77209	1.60726	0.270467	1.0122	0.3505	1.289	2.3952	1.6205	0.1733	0.1981	0.1708
	Maximum		12.9432	12.5279	2.8359	0.9703	1.4897	0.7716	1.7024	1.0223	6.56254	1.88163	5.8367	2.06462	5.76837	6.1861	4.51729	5.20165	5.61332	6.78564	0.894442	1.8509	0.478192	1.1925	0.5435	1.449	2.6772	2.213	0.2648	0.2495	0.2515
	Count (n)		6	6	6	6	6	6	6	6	6	6	5	3	5	5	5	5	5	5	6	6	6	6	6	6	6	6	5	5	5
female	Mean		15.0142	14.4655	2.95443	0.93512	1.54782	0.773567	1.93758	1.15707	6.7077	1.84424	5.60976	1.16277	6.31326	6.77875	4.17302	5.39739	5.80012	7.20868	0.942166	2.15574	0.500855	1.17355	0.610867	1.71312	3.55007	2.94723	0.267017	0.286617	0.24118
	SD		0.630009	0.377592	0.0806944	0.0287291	0.0476282	0.0415771	0.255275	0.330824	0.236392	0.104364	0.810672	0.676997	0.473098	0.487575	0.321265	0.325833	0.421108	0.715145	0.133991	0.195922	0.0242688	0.0350636	0.0727625	0.108551	0.305825	0.613196	0.0303247	0.142757	0.0168347
	Range		1.4173	0.9588	0.2133	0.0673	0.1206	0.1048	0.7017	0.743	0.519886	0.206341	2.03438	1.3477	1.31687	1.24137	0.843977	0.867119	1.0721	1.87958	0.189492	0.277075	0.0343213	0.0876	0.2051	0.2687	0.7892	1.5087	0.0902	0.3683	0.0438
	Minimum		14.4272	14.1129	2.8245	0.9068	1.491	0.7684	1.5424	1.0223	6.45636	1.68799	4.82218	0.526572	5.76197	6.32347	3.64762	4.96679	5.45411	6.02246	0.84742	2.0172	0.483695	1.117	0.5061	1.5627	3.2214	2.2968	0.2267	0	0.2159
	Maximum		15.8445	15.0717	3.0378	0.9741	1.6116	0.8732	2.2441	1.7653	6.97624	1.89433	6.85657	1.87427	7.07883	7.56484	4.4916	5.83391	6.52621	7.90204	1.03691	2.29427	0.518016	1.2046	0.7112	1.8314	4.0106	3.8055	0.3169	0.3683	0.2597
	Count (n)		6	6	6	5	6	6	6	6	5	5	5	3	6	6	5	5	5	5	2	2	2	6	6	6	6	6	6	6	5
Z. vespiformis
male	Mean		12.9232	10.3848	2.37096	0.67996	1.2254	0.58382	1.46012	0.99402	5.73571	1.46564	7.16296	1.56883	5.66304	6.29292	4.27023	5.29562	5.77573	7.08818	1.00201	1.49385	0.432015	1.04522	0.54838	1.40603	2.42964	2.26338	0.22312	0.26846	0.270175
	SD		0.827716	0.491644	0.0599826	0.0334994	0.0820674	0.0281914	0.121848	0.191624	0.261156	0.0320981	1.22719	0.12884	0.259832	0.207805	0.198463	0.191257	0.233148	0.286949	0.0706945	0.0672871	0.0537294	0.0454195	0.0229844	0.0273756	0.0650726	0.370193	0.0252157	0.0335496	0.0213331
	Range		2.2054	1.3107	0.1225	0.0718	0.1961	0.0622	0.2845	0.4306	0.6887	0.0885624	2.44046	0.292844	0.639547	0.507245	0.476408	0.475334	0.526231	0.571334	0.159527	0.166315	0.11897	0.1073	0.0616	0.0603	0.1428	0.8407	0.0623	0.0731	0.0489																.
	Minimum		11.5233	9.812	2.387	0.6788	1.1729	0.5455	1.3157	0.9004	5.45425	1.42844	5.95013	1.42908	5.34457	6.08358	3.94619	5.01459	5.47115	6.79272	0.910456	1.43467	0.370278	0.9957	0.5188	1.3824	2.3724	1.8618	0.2051	0.2387	0.2394
	Maximum		13.7287	11.1227	2.5095	0.7506	1.369	0.6077	1.6002	1.331	6.14295	1.517	8.39059	1.72192	5.98411	6.59083	4.4226	5.48992	5.99738	7.36405	1.06998	1.60098	0.489248	1.103	0.5804	1.4427	2.5152	2.7025	0.2674	0.3118	0.2883
	Count (n)		6	6	5	5	5	5	5	5	6	5	4	4	5	5	5	5	4	4	5	5	5	5	5	4	5	5	5	5	4
female	Mean		17.4689	13.9516	2.9962	0.95045	1.51574	0.71258	2.16242	0.92254	6.96407	1.78486	6.23149	-	6.54951	7.22557	5.13396	6.27986	6.75558	8.8089	1.27607	1.78987	0.448719	1.1985	0.63236	1.81204	3.44172	3.02336	0.3246	0.407525	0.327325
	SD		0.645262	0.745303	0.228439	0.0295444	0.13167	0.0450681	0.194318	0.139699	0.444566	0.0570641	0.486265	-	1.02204	0.808438	0.579905	0.364927	0.522979	0.66711	0.0837255	0.109946	0.0257961	0.0576593	0.0390517	0.13622	0.196037	0.512775	0.0417353	0.0233187	0.0265063
	Range		1.8065	1.8523	0.5975	0.0533	0.3206	0.1086	0.4121	0.3652	1.0453	0.113352	0.964715	-	2.413	1.84255	1.25323	0.784086	1.06009	1.31805	0.177178	0.281746	0.0511316	0.1518	0.1066	0.3315	0.5309	1.3125	0.0915	0.0533	0.0622
	Minimum		16.484	12.6428	2.6645	0.9246	1.3526	0.6483	1.9158	0.7715	6.50563	1.72435	5.71361	-	5.24915	6.34139	4.40353	5.82883	6.26903	8.07212	1.1817	1.64999	0.419926	1.1328	0.583	1.6275	3.1877	2.4245	0.2838	0.3747	0.2902
	Maximum		18.2905	14.4951	3.262	0.9779	1.6732	0.7569	2.3279	1.1367	7.55093	1.8377	6.67832	-	7.66215	8.18393	5.65676	6.61291	7.32913	9.39018	1.35888	1.93174	0.471057	1.2846	0.6896	1.959	3.7186	3.737	0.3753	0.428	0.3524
	Count (n)		5	5	5	4	5	5	5	5	4	3	3	-	5	5	4	4	4	4	5	5	4	5	5	5	5	5	5	4	4
Z. xouthos
male	n=1		12.5908	10.1873	2.54	0.781	1.3449	0.6179	1.5151	0.9626	6.6642	1.82374	6.90292	-	5.81896	6.3648	4.29276	5.33348	5.57671	6.9372	0.810028	1.65706	0.352564	1.0464	0.4458	1.2859	2.5629	1.2319	0.179	0.1778	0.1626
female	n=1		14.6901	-	2.7311	0.9303	1.3112	0.722	1.5342	0.863	6.77896	1.9248	4.72155	1.61298	6.48671	6.59838	4.80697	5.41251	5.82843	7.18804	1.37242	2.02802	0.4883	1.1176	0.5149	1.5564	3.4188	-	0.2902	0.287	0.1747
Z. zayasi
female	n=1		12.3876	12.3228	2.0784	0.5842	1.1056	0.6896	1.2928	0.8674	5.75975	1.48103	4.87036	-	5.21882	5.39976	3.33615	4.09147	4.51357	5.67767	0.884225	1.401	0.2689	0.9061	0.3658	1.0763	1.6916	1.5341	0.188	0.2064	0.1588

## Sheet: species.index
Species
COMBINED
ANALYSIS
aithaleos
amblycephalus
ambulans
annulosus
antiguensis
armillatus
auralanus
bahiaensis
banksi
bruneri
casii
cervicalis
cestartus
chamaeleon
championi
cognatus
conjungens
cordazulus
errans
erythrocephalus
exsanguis
fasciatus
filicauda
fuliginatus
gilboventris
gracilipes
grandoculus
grassans
illotus
impar
inconstans
janus
kartabenoides
kartabensis
korystos
laticornis
leucogrammus
lewisi
litigiosus
longipes
luridus
mattogrossensis
means
mimus
minutus
nigromaculatus
nugax
panamensis
paracephalus
pedestris
plagiatus
prolixus
puertoricensis
renardii
ruficeps
russulumus
spatulosus
sphegeus
subimpressus
sulcicollis
tetracanthus
truxali
umbraculoides
umbraculus
vagans
varius
versicolor
vespiformis
xouthos
zayasi
sp_band

## Sheet: aithaleos
Males	Notes																														1		2		3		4		5		6		7		8		9		10
SPECIMEN		Total Leng	Clyp-Abd	LenHead	LenAntOc	LenPostOc	LenAntPron	LenPostPron	LenScut	LenScap	LenPed	LenAnte-3	LenAnte-4	LenFF	LenFT	LenMF	LenMT	LenHF	LenHT	LenLB1	LenLB2	LenLB3	WidHead	InterOcDi	WidAntPrn	WidPosPrn	WidAbd	WidFF	WidMF	WidHF	xpt1	ypt1	xpt2	ypt2	xpt3	ypt3	xpt4	ypt4	xpt5	ypt5	xpt6	ypt6	xpt7	ypt7	xpt8	ypt8	xpt9	ypt9	xpt15
UCR_ENT 47314	Antennal III - broken; LenAnte-4 missing	13.7401	11.1703	2.3939	0.7328	1.2185	0.5792	1.7348	0.9258	6.62266	1.83389	3.39946	N/A	5.97554	6.5985	4.39935	5.43919	5.78772	6.37686	0.901043	1.50776	0.407381	1.0427	0.3683	1.611	2.5597	1.5545	0.2375	0.2184	0.2337	0	0	0	-0.7328	0	-1.1754	0	-2.3939	0	-2.9731	0	-4.7079	0	-5.6337	0	-11.1703	0	-13.7401	1.0573
		0	0	0	0	0	0	0	0	0	0	0	0	0	0	0	0	0	0	0	0	0	0	0	0	0	0	0	0	0
		0	0	0	0	0	0	0	0	0	0	0	0	0	0	0	0	0	0	0	0	0	0	0	0	0	0	0	0	0
		0	0	0	0	0	0	0	0	0	0	0	0	0	0	0	0	0	0	0	0	0	0	0	0	0	0	0	0	0
		0	0	0	0	0	0	0	0	0	0	0	0	0	0	0	0	0	0	0	0	0	0	0	0	0	0	0	0	0
		0	0	0	0	0	0	0	0	0	0	0	0	0	0	0	0	0	0	0	0	0	0	0	0	0	0	0	0	0
		0	0	0	0	0	0	0	0	0	0	0	0	0	0	0	0	0	0	0	0	0	0	0	0	0	0	0	0	0
		0	0	0	0	0	0	0	0	0	0	0	0	0	0	0	0	0	0	0	0	0	0	0	0	0	0	0	0	0
		0	0	0	0	0	0	0	0	0	0	0	0	0	0	0	0	0	0	0	0	0	0	0	0	0	0	0	0	0
Mean		13.7401	11.1703	2.3939	0.7328	1.2185	0.5792	1.7348	0.9258	6.62266	1.83389	-	-	5.97554	6.5985	4.39935	5.43919	5.78772	6.37686	0.901043	1.50776	0.407381	1.0427	0.3683	1.611	2.5597	1.5545	0.2375	0.2184	0.2337
Standard Deviation		-	-	-	-	-	-	-	-	-	-	-	-	-	-	-	-	-	-	-	-	-	-	-	-	-	-	-	-	-
Range		-	-	-	-	-	-	-	-	-	-	-	-	-	-	-	-	-	-	-	-	-	-	-	-	-	-	-	-	-																.
Minimum		-	-	-	-	-	-	-	-	-	-	-	-	-	-	-	-	-	-	-	-	-	-	-	-	-	-	-	-	-
Maximum		-	-	-	-	-	-	-	-	-	-	-	-	-	-	-	-	-	-	-	-	-	-	-	-	-	-	-	-	-
Count		1	1	1	1	1	1	1	1	1	1	1	0	1	1	1	1	1	1	1	1	1	1	1	1	1	1	1	1	1
Females																															1		2		3		4		5		6		7		8		9		10
SPECIMEN		Total Leng	Clyp-Abd	LenHead	LenAntOc	LenPostOc	LenAntPron	LenPostPron	LenScut	LenScap	LenPed	LenAnte-3	LenAnte-4	LenFF	LenFT	LenMF	LenMT	LenHF	LenHT	LenLB1	LenLB2	LenLB3	WidHead	InterOcDi	WidAntPrn	WidPosPrn	WidAbd	WidFF	WidMF	WidHF	xpt1	ypt1	xpt2	ypt2	xpt3	ypt3	xpt4	ypt4	xpt5	ypt5	xpt6	ypt6	xpt7	ypt7	xpt8	ypt8	xpt9	ypt9	xpt15
UCR_ENT 00009327	only 1st segment rest are missing	16.5722	13.0975	2.5362	0.9385	1.0821	0.5512	2.0898	1.1842	6.98592	N/A	N/A	N/A	6.78775	7.15562	4.57414	5.47462	6.27971	6.47718	1.03445	1.50001	0.438332	0.9817	0.4597	1.5234	3.0474	3.4423	0.2813	0.3626	0.2616	0	0	0	-0.9385	0	-1.4541	0	-2.5362	0	-3.0874	0	-5.1772	0	-6.3614	0	-13.0975	0	-16.5722	1.884
UCR_ENT 00009328	LenAnte-3,4 missing. H leg missing on leftside. F leg missing on rightside	17.606	13.8963	2.7076	0.9715	1.2223	0.5239	1.8879	1.2058	6.73186	1.77804	N/A	N/A	6.65921	6.90548	4.2357	5.59731	N/A	N/A	1.05636	1.69883	0.439917	1.1868	0.6134	1.6421	3.1007	3.6132	0.2991	0.3347	N/A	0	0	0	-0.9715	0	-1.4853	0	-2.7076	0	-3.2315	0	-5.1194	0	-6.3252	0	-13.8963	0	-17.606	2.467
UCR_ENT 00071252	LenAnte-4 missing. Length/width of thorax missing.	17.0485	14.4634	2.307	0.8236	0.7747	2.307	N/A	N/A	6.84739	1.8438	N/A	N/A	6.96236	6.95639	4.79213	5.45887	6.81732	8.146	1.09051	1.70584	0.369357	1.124	0.5759	N/A	N/A	4.7428	0.3074	0.3772	0.301	0	0	0	-0.8236	0	-1.5323	0	-2.307							0	-14.4634	0	-17.0485	2.7381
UCR_ENT 00071251	missing width of body. No antenna. Only had H leg.	13.869	13.0791	2.6835	0.8318	1.3056	0.6509	2.1202	1.1227	N/A	N/A	N/A	N/A	N/A	N/A	N/A	N/A	6.90516	8.25221	1.10342	1.50029	0.354377	1.1202	0.6045	1.6935	3.0473	N/A	N/A	N/A	0.2743	0	0	0	-0.8318	0	-1.3779	0	-2.6835	0	-3.3344	0	-5.4546	0	-6.5773	0	-13.0791	0	-13.869
		0	0	0	0	0	0	0	0	0	0	0	0	0	0	0	0	0	0	0	0	0	0	0	0	0	0	0	0	0
		0	0	0	0	0	0	0	0	0	0	0	0	0	0	0	0	0	0	0	0	0	0	0	0	0	0	0	0	0
		0	0	0	0	0	0	0	0	0	0	0	0	0	0	0	0	0	0	0	0	0	0	0	0	0	0	0	0	0
		0	0	0	0	0	0	0	0	0	0	0	0	0	0	0	0	0	0	0	0	0	0	0	0	0	0	0	0	0
		0	0	0	0	0	0	0	0	0	0	0	0	0	0	0	0	0	0	0	0	0	0	0	0	0	0	0	0	0
		0	0	0	0	0	0	0	0	0	0	0	0	0	0	0	0	0	0	0	0	0	0	0	0	0	0	0	0	0
Mean		16.2739	13.6341	2.55858	0.89135	1.09617	0.575333	2.03263	1.1709	6.85506	1.81092	#DIV/0!	-	6.80311	7.00583	4.53399	5.51027	6.6674	7.62513	1.07118	1.60124	0.400496	1.10318	0.563375	1.61967	3.06513	3.93277	0.295933	0.358167	0.278967
Standard Deviation		1.65801	0.671429	0.184034	0.0747962	0.233317	0.0668511	0.126261	0.0431169	0.127203	0.0465	-	-	0.152157	0.132197	0.280383	0.0757924	0.338606	0.995574	0.0315297	0.116769	0.0450268	0.0865503	0.070944	0.0872407	0.0308017	0.706695	0.013335	0.0215941	0.0201103
Range		3.737	1.3843	0.4006	0.1479	0.5309	0.127	0.2323	0.0831	0.25406	0.0657609	0	0	0.303149	0.250145	0.556437	0.13844	0.625446	1.77503	0.068978	0.205833	0.0855402	0.2051	0.1537	0.1701	0.0534	1.3005	0.0261	0.0425	0.0394
Minimum		13.869	13.0791	2.307	0.8236	0.7747	0.5239	1.8879	1.1227	6.73186	1.77804	0	0	6.65921	6.90548	4.2357	5.45887	6.27971	6.47718	1.03445	1.50001	0.354377	0.9817	0.4597	1.5234	3.0473	3.4423	0.2813	0.3347	0.2616
Maximum		17.606	14.4634	2.7076	0.9715	1.3056	0.6509	2.1202	1.2058	6.98592	1.8438	0	0	6.96236	7.15562	4.79213	5.59731	6.90516	8.25221	1.10342	1.70584	0.439917	1.1868	0.6134	1.6935	3.1007	4.7428	0.3074	0.3772	0.301
Count		4	4	4	4	4	3	3	3	3	2	0	0	3	3	3	3	3	3	4	4	4	4	4	3	3	3	3	3	3
[truncated: 69 more columns]

## Sheet: amblycephalus
	Males	Notes																														1		2		3		4		5		6		7		8		9
	SPECIMEN		Total Leng	Clyp-Abd	LenHead	LenAntOc	LenPostOc	LenAntPron	LenPostPron	LenScut	LenScap	LenPed	LenAnte-3	LenAnte-4	LenFF	LenFT	LenMF	LenMT	LenHF	LenHT	LenLB1	LenLB2	LenLB3	WidHead	InterOcDi	WidAntPrn	WidPosPrn	WidAbd	WidFF	WidMF	WidHF	xpt1	ypt1	xpt2	ypt2	xpt3	ypt3	xpt4	ypt4	xpt5	ypt5	xpt6	ypt6	xpt7	ypt7	xpt8	ypt8	xpt9	ypt9
	UCR_ENT 00009495	Only one segment. 2,3 and 4 missing. Front leg missing on leftside. Hind leg missing on right side.	15.4267	14.3986	2.6626	0.6382	1.5291	0.9766	1.9799	0.6477	6.30215	N/A	N/A	N/A	N/A	N/A	N/A	N/A	N/A	N/A	1.2027	1.61371	0.333714	1.2496	0.6052	1.7164	3.7122	2.5889	N/A	N/A	N/A	0	0	0	-0.6382	0	-1.1335	0	-2.6626	0	-3.6392	0	-5.6191	0	-6.2668	0	-14.3986	0	-15.4267
	UCR_ENT 00009496		15.7823	15.5188	3.0201	0.8566	1.5621	0.8293	2.105	1.0046	6.08508	1.87292	6.24821	1.9474	6.10496	6.32978	4.4255	5.38997	6.36338	7.43757	1.16807	1.63656	0.269307	1.2865	0.6287	1.7424	3.6716	2.7762	0.348	0.3359	0.2851	0	0	0	-0.8566	0	-1.458	0	-3.0201	0	-3.8494	0	-5.9544	0	-6.959	0	-15.5188	0	-15.7823
	UCR_ENT 00009497	LenAnte-4 missing?	15.6642	14.5644	2.8607	0.842	1.4993	0.842	2.0701	1.0465	6.63381	1.94519	5.60899	N/A	6.23252	6.79629	4.60592	5.15027	6.60226	7.06374	1.16195	1.60847	0.351923	1.2865	0.6705	1.7011	3.5103	1.9577	0.348	0.3169	0.3238	0	0	0	-0.842	0	-1.3614	0	-2.8607	0	-3.7027	0	-5.7728	0	-6.8193	0	-14.5644	0	-15.6642
	UCR_ENT 00009493	LenAnte-4 is missing and segment 3 is possibly broken.	15.7588	14.6056	2.9337	0.7982	1.5659	0.8642	2.2429	0.7689	6.23212	1.87117	2.59051	N/A	6.39354	6.65361	4.56446	4.76372	6.63488	7.18362	1.11917	1.59731	0.377379	1.3519	0.6661	1.778	3.7979	2.0555	0.3517	0.3474	0.2813	0	0	0	-0.7982	0	-1.3678	0	-2.9337	0	-3.7979	0	-6.0408	0	-6.8097	0	-14.6056	0	-15.7588
	UCR_ENT 00010840	LenAnte-4 is missing	17.4911	16.2115	3.088	0.816	1.7151	0.7874	1.999	1.5818	7.04805	1.93919	5.79481	N/A	6.34205	7.51837	5.64134	5.74013	7.43509	8.46005	1.36096	1.80023	0.410478	1.4592	0.7747	2.1094	4.092	2.4155	0.3213	0.3429	0.3048	0	0	0	-0.816	0	-1.3729	0	-3.088	0	-3.8754	0	-5.8744	0	-7.4562	0	-16.2115	0	-17.4911
	UCR_ENT 00022669	LenAnte-4 missing	14.9727	14.5313	2.8543	0.7899	1.6059	0.962	1.8028	1.3392	5.82054	1.54285	6.20047	N/A	5.9382	6.46684	4.6336	5.07284	6.30941	6.83821	1.23487	1.59832	0.403182	1.3093	0.7601	1.7983	3.7363	2.0663	0.3512	0.3022	0.2744	0	0	0	-0.7899	0	-1.2484	0	-2.8543	0	-3.8163	0	-5.6191	0	-6.9583	0	-14.5313	0	-14.9727
	UCR_ENT 00009473		14.8361	14.2577	2.6676	0.7893	1.3786	0.7055	2.0104	1.1976	6.16069	1.64452	6.70276	2.85303	6.29294	6.83966	4.56451	5.34633	6.078	7.09463	1.14647	1.33428	0.410786	1.2426	0.6725	1.8549	3.8684	3.2639	0.3213	0.3252	0.2838	0	0	0	-0.7893	0	-1.289	0	-2.6676	0	-3.3731	0	-5.3835	0	-6.5811	0	-14.2577	0	-14.8361
			0	0	0	0	0	0	0	0	0	0	0	0	0	0	0	0	0	0	0	0	0	0	0	0	0	0	0	0	0
			0	0	0	0	0	0	0	0	0	0	0	0	0	0	0	0	0	0	0	0	0	0	0	0	0	0	0	0	0
			0	0	0	0	0	0	0	0	0	0	0	0	0	0	0	0	0	0	0	0	0	0	0	0	0	0	0	0	0
	Mean		15.7046	14.8697	2.86957	0.790029	1.55086	0.852429	2.03001	1.08376	6.32606	1.80264	6.11105	2.40022	6.21737	6.76742	4.73922	5.24388	6.5705	7.3463	1.19917	1.59841	0.365253	1.31223	0.682543	1.81436	3.76981	2.44629	0.34025	0.328417	0.2922
	Standard Deviation		0.872677	0.718298	0.162493	0.0717943	0.102601	0.0948889	0.134185	0.322282	0.401322	0.167987	0.426908	0.640383	0.16917	0.415887	0.447712	0.330658	0.470383	0.579062	0.0806163	0.1368	0.0517722	0.074473	0.0631206	0.140163	0.180623	0.4716	0.0147603	0.0170671	0.0185145
	Range		2.5184	1.8129	0.4254	0.2184	0.2158	0.1892	0.4401	0.9341	1.22751	0.402343	1.09377	0	0.455339	1.18859	1.21584	0.976408	1.12569	1.62184	0.241794	0.202915	0.141171	0.2096	0.1695	0.4083	0.5817	0.8185	0.0304	0.0452	0.0494																.
	Minimum		14.8361	14.2577	2.6626	0.6382	1.3786	0.7055	1.8028	0.6477	5.82054	1.54285	5.60899	1.9474	5.9382	6.32978	4.4255	4.76372	6.078	6.83821	1.11917	1.33428	0.269307	1.2426	0.6052	1.7011	3.5103	1.9577	0.3213	0.3022	0.2744
	Maximum		17.4911	16.2115	3.088	0.8566	1.7151	0.9766	2.2429	1.5818	7.04805	1.94519	6.70276	1.9474	6.39354	7.51837	5.64134	5.74013	7.43509	8.46005	1.36096	1.80023	0.410478	1.4592	0.7747	2.1094	4.092	2.7762	0.3517	0.3474	0.3238
	Count		7	7	7	7	7	7	7	7	7	6	5	2	6	6	6	6	6	6	7	7	7	7	7	7	7	7	6	6	6
	Females																															1		2		3		4		5		6		7		8		9
	SPECIMEN		Total Leng	Clyp-Abd	LenHead	LenAntOc	LenPostOc	LenAntPron	LenPostPron	LenScut	LenScap	LenPed	LenAnte-3	LenAnte-4	LenFF	LenFT	LenMF	LenMT	LenHF	LenHT	LenLB1	LenLB2	LenLB3	WidHead	InterOcDi	WidAntPrn	WidPosPrn	WidAbd	WidFF	WidMF	WidHF	xpt1	ypt1	xpt2	ypt2	xpt3	ypt3	xpt4	ypt4	xpt5	ypt5	xpt6	ypt6	xpt7	ypt7	xpt8	ypt8	xpt9	ypt9
	UCR_ENT 00017184 (#)	antenna hard to get on one plane	N/A	N/A	3.2512	0.8401	1.8161	1.049	2.2924	1.1138	N/A	N/A	N/A	N/A	7.66624	7.50195	5.7627	6.61972	8.09762	8.7925	1.49033	1.73092	0.414991	1.2415	0.6223	2.032	3.9859	N/A	0.4483	0.4216	0.3454	0	0	0	-0.8401	0	-1.4351	0	-3.2512	0	-4.3002	0	-6.5926	0	-7.7064
	UCR_ENT 00022670	LenAnte-4 missing	15.2063	14.8793	2.7622	0.7493	1.5957	0.8649	1.8517	1.4973	6.30429	1.75473	5.00373	N/A	6.30053	7.03748	4.69096	5.60818	6.66968	7.90757	1.25235	1.80972	0.369534	1.2631	0.6655	1.8396	3.5389	3.2442	0.3835	0.3549	0.2489	0	0	0	-0.7493	0	-1.1665	0	-2.7622	0	-3.6271	0	-5.4788	0	-6.9761	0	-14.8793	0	-15.2063
	UCR_ENT 00017182	M leg missing	18.1699	17.7527	3.4798	1.0598	1.9221	1.1043	2.2333	1.5189	8.05814	2.07999	7.43103	1.45389	7.99096	8.48485	N/A	N/A	8.28805	9.73791	1.15744	2.01481	0.4244	1.3417	0.6528	2.1444	4.2031	3.3439	0.4318	N/A	0.3759	0	0	0	-1.0598	0	-1.5577	0	-3.4798	0	-4.5841	0	-6.8174	0	-8.3363	0	-17.7527	0	-18.1699
			0	0	0	0	0	0	0	0	0	0	0	0	0	0	0	0	0	0	0	0	0	0	0	0	0	0	0	0	0
			0	0	0	0	0	0	0	0	0	0	0	0	0	0	0	0	0	0	0	0	0	0	0	0	0	0	0	0	0
			0	0	0	0	0	0	0	0	0	0	0	0	0	0	0	0	0	0	0	0	0	0	0	0	0	0	0	0	0
			0	0	0	0	0	0	0	0	0	0	0	0	0	0	0	0	0	0	0	0	0	0	0	0	0	0	0	0	0
			0	0	0	0	0	0	0	0	0	0	0	0	0	0	0	0	0	0	0	0	0	0	0	0	0	0	0	0	0
			0	0	0	0	0	0	0	0	0	0	0	0	0	0	0	0	0	0	0	0	0	0	0	0	0	0	0	0	0
			0	0	0	0	0	0	0	0	0	0	0	0	0	0	0	0	0	0	0	0	0	0	0	0	0	0	0	0	0
	Mean		16.6881	16.316	3.1644	0.883067	1.77797	1.00607	2.1258	1.5081	7.18122	1.91736	6.21738	1.45389	7.31924	7.67476	5.22683	6.11395	7.68511	8.81266	1.30004	1.85182	0.402975	1.2821	0.646867	2.00533	3.9093	3.29405	0.4212	0.38825	0.3234
	Standard Deviation		2.09558	2.0318	0.36659	0.159647	0.166508	0.125342	0.23921	0.0152735	1.24016	0.229997	1.71636	#DIV/0!	0.897047	0.738998	0.757836	0.715267	0.884533	0.915337	0.171491	0.146552	0.0293403	0.0527329	0.0222028	0.15414	0.338661	0.0704985	0.0336754	0.047164	0.0662967
	Range		2.9636	2.8734	0.7176	0.3105	0.3264	0.2394	0.4407	0.0216	1.75385	0.325264	2.4273	0	1.69043	1.44737	1.07174	1.01154	1.61837	1.83034	0.332887	0.28389	0.0548658	0.1002	0.0432	0.3048	0.6642	0.0997	0.0648	0.0667	0.127
	Minimum		15.2063	14.8793	2.7622	0.7493	1.5957	0.8649	1.8517	1.4973	6.30429	1.75473	5.00373	1.45389	6.30053	7.03748	4.69096	5.60818	6.66968	7.90757	1.15744	1.73092	0.369534	1.2415	0.6223	1.8396	3.5389	3.2442	0.3835	0.3549	0.2489
	Maximum		18.1699	17.7527	3.4798	1.0598	1.9221	1.1043	2.2924	1.5189	8.05814	2.07999	7.43103	1.45389	7.99096	8.48485	5.7627	6.61972	8.28805	9.73791	1.49033	2.01481	0.4244	1.3417	0.6655	2.1444	4.2031	3.3439	0.4483	0.4216	0.3759
	Count		2	2	3	3	3	3	3	2	2	2	2	1	3	3	2	2	3	3	3	3	3	3	3	3	3	2	3	2	3
	(#) - abdomen broken off. Landmark 8 skipped
[truncated: 70 more columns]

## Sheet: ambulans
	Males	Notes																														1		2		3		4		5		6		7		8		9
	SPECIMEN		Total Leng	Clyp-Abd	LenHead	LenAntOc	LenPostOc	LenAntPron	LenPostPron	LenScut	LenScap	LenPed	LenAnte-3	LenAnte-4	LenFF	LenFT	LenMF	LenMT	LenHF	LenHT	LenLB1	LenLB2	LenLB3	WidHead	InterOcDi	WidAntPrn	WidPosPrn	WidAbd	WidFF	WidMF	WidHF	xpt1	ypt1	xpt2	ypt2	xpt3	ypt3	xpt4	ypt4	xpt5	ypt5	xpt6	ypt6	xpt7	ypt7	xpt8	ypt8	xpt9	ypt9
	UCR_ENT 00017883		13.3852	11.8523	2.3444	0.7957	1.0808	0.6903	1.7532	0.9842	4.93748	1.45998	5.01078	1.32878	4.90479	5.38136	3.85501	4.57077	4.7931	5.87749	0	0	0	1.0528	0.5798	1.4497	3.3198	1.7779	0.2718	0.2407	0.2203	0	0	0	-0.7957	0	-1.2636	0	-2.3444	0	-3.0347	0	-4.7879	0	-5.7721	0	-11.8523	0	-13.3852
	UCR_ENT 00034257	LenAnte-4 missing	15.1378	12.8968	2.7603	0.9074	1.2655	0.6655	1.712	1.2941	6.27109	1.74301	5.54816	N/A	6.00949	6.25052	8.1841	5.17443	5.78991	5.9591	0.938935	1.61315	0.413706	1.2415	0.5982	1.5303	3.3998	2.272	0.2514	0.2394	0.2343	0	0	0	-0.9074	0	-1.4948	0	-2.7603	0	-3.4258	0	-5.1378	0	-6.4319	0	-12.8968	0	-15.1378
	UCR_ENT 00034252	Segments 3 and 4 missing	14.2951	12.6352	2.5082	0.8928	1.1455	0.7284	1.8421	1.1773	5.57045	1.66369	5.83047	N/A	5.36603	5.71465	3.88004	4.75058	3.87068	5.23361	0.867564	1.55981	0.278991	1.1023	0.6286	1.3868	3.603	2.733	0.2914	0.2775	0.2495	0	0	0	-0.8928	0	-1.3627	0	-2.5082	0	-3.2366	0	-5.0787	0	-6.256	0	-12.6352	0	-14.2951
	UCR_ENT 00034202	LenAnte-4 missing	12.8861	11.5646	2.4651	0.736	1.265	0.6426	1.6548	0.9627	4.14004	1.56095	3.32258	8.56265	4.73489	5.12896	3.66139	4.03523	4.70171	5.4179	0.762933	1.46732	0.323848	1.044	0.6032	1.4396	3.1108	2.5629	0.2737	0.2407	0.2477	0	0	0	-0.736	0	-1.2001	0	-2.4651	0	-3.1077	0	-4.7625	0	-5.7252	0	-11.5646	0	-12.8861
	UCR_ENT 00021680	No antenna	15.1892	13.9535	2.8194	0.8985	1.4516	0.7855	1.865	1.1887	N/A	N/A	N/A	N/A	5.9602	6.28741	4.44032	5.12246	5.69138	6.86165	0.673672	1.11329	0.25341	1.1729	0.635	1.6345	3.6665	2.8956	0.2927	0.2749	0.2737	0	0	0	-0.8985	0	-1.3678	0	-2.8194	0	-3.6049	0	-5.4699	0	-6.6586	0	-13.9535	0	-15.1892
	UCR_ENT 00038348	antenna and total body length only. Didn’t measure wing	N/A	13.3667	N/A	N/A	N/A	N/A	N/A	N/A	6.37969	2.0611	5.63601	1.66676	N/A	N/A	N/A	N/A	N/A	N/A	N/A	N/A	N/A	N/A	N/A	N/A	N/A	N/A	N/A	N/A	N/A	0	0													0	-13.3667
	UCR_ENT 00069998	antenna and total body length only	14.3224	13.1794	N/A	N/A	N/A	N/A	N/A	N/A	6.11113	1.71656	5.52689	1.67432	N/A	N/A	N/A	N/A	N/A	N/A	N/A	N/A	N/A	N/A	N/A	N/A	N/A	N/A	N/A	N/A	N/A	0	0													0	-13.1794	0	-14.3224
	UCR_ENT 00034253	antenna and total body length only	14.6748	13.3071	N/A	N/A	N/A	N/A	N/A	N/A	6.15339	1.82228	5.73102	1.87146	N/A	N/A	N/A	N/A	N/A	N/A	N/A	N/A	N/A	N/A	N/A	N/A	N/A	N/A	N/A	N/A	N/A	0	0													0	-13.3071	0	-14.6748
	UCR_ENT 00001097	antenna and total body length only. Didn’t measure wing	N/A	12.8638	N/A	N/A	N/A	N/A	N/A	N/A	5.62712	1.56296	4.75403	1.70796	N/A	N/A	N/A	N/A	N/A	N/A	N/A	N/A	N/A	N/A	N/A	N/A	N/A	N/A	N/A	N/A	N/A	0	0													0	-12.8638
			0	0	0	0	0	0	0	0	0	0	0	0	0	0	0	0	0	0	0	0	0	0	0	0	0	0	0	0	0
	Mean		14.2701	12.8466	2.57948	0.84608	1.24168	0.70246	1.76542	1.1214	5.6488	1.69882	5.16999	1.64986	5.39508	5.75258	3.95919	4.73069	4.96936	5.86995	0.648621	1.15071	0.253991	1.1227	0.60896	1.48818	3.41998	2.44828	0.2762	0.25464	0.2451
	Standard Deviation		0.862486	0.749851	0.202289	0.0763978	0.141696	0.0562709	0.0880849	0.142731	0.772634	0.186894	0.832367	0.197774	0.586076	0.515296	0.335307	0.463689	0.791268	0.632606	0.376371	0.672121	0.154536	0.083859	0.0227105	0.096569	0.223777	0.440109	0.0169111	0.0197101	0.0198479
	Range		2.3031	2.3889	0.475	0.1714	0.3708	0.1429	0.2102	0.3314	2.23965	0.601124	2.50788	0.54268	1.2746	1.15844	0.778934	1.13921	1.91923	1.62805	0.938935	1.61315	0.413706	0.1975	0.0552	0.2477	0.5557	1.1177	0.0413	0.0381	0.0534																.
	Minimum		12.8861	11.5646	2.3444	0.736	1.0808	0.6426	1.6548	0.9627	4.14004	1.45998	3.32258	1.32878	4.73489	5.12896	3.66139	4.03523	3.87068	5.23361	0	0	0	1.044	0.5798	1.3868	3.1108	1.7779	0.2514	0.2394	0.2203
	Maximum		15.1892	13.9535	2.8194	0.9074	1.4516	0.7855	1.865	1.2941	6.37969	2.0611	5.83047	1.87146	6.00949	6.28741	4.44032	5.17443	5.78991	6.86165	0.938935	1.61315	0.413706	1.2415	0.635	1.6345	3.6665	2.8956	0.2927	0.2775	0.2737
	Count		7	9	5	5	5	5	5	5	8	8	8	5	5	5	4	5	5	5	5	5	5	5	5	5	5	5	5	5	5
	Females																															1		2		3		4		5		6		7		8		9
	SPECIMEN		Total Leng	Clyp-Abd	LenHead	LenAntOc	LenPostOc	LenAntPron	LenPostPron	LenScut	LenScap	LenPed	LenAnte-3	LenAnte-4	LenFF	LenFT	LenMF	LenMT	LenHF	LenHT	LenLB1	LenLB2	LenLB3	WidHead	InterOcDi	WidAntPrn	WidPosPrn	WidAbd	WidFF	WidMF	WidHF	xpt1	ypt1	xpt2	ypt2	xpt3	ypt3	xpt4	ypt4	xpt5	ypt5	xpt6	ypt6	xpt7	ypt7	xpt8	ypt8	xpt9	ypt9
	UCR_ENT 00039909	LenAnte-4 missing	18.5903	17.7863	3.4715	1.1868	1.7513	0.8922	2.3654	1.4078	5.97535	2.06522	5.49408	N/A	7.56393	8.11283	6.75728	6.61982	7.5137	8.93347	1.15367	2.1192	0.431205	1.3011	0.748	1.7088	4.4412	3.2499	0.4191	0.4541	0.3461	0	0	0	-1.1868	0	-1.7202	0	-3.4715	0	-4.3637	0	-6.7291	0	-8.1369	0	-17.7863	0	-18.5903
	UCR_ENT 00039907	No antenna	15.4286	14.6361	2.8473	0.9252	1.4757	0.6693	1.9552	1.1195	N/A	N/A	N/A	N/A	4.97516	5.45329	3.67162	4.6248	4.91557	5.85668	0.913498	1.70586	0.461488	1.0852	0.5036	1.5101	3.8328	2.6207	0.3587	0.414	0.2927	0	0	0	-0.9252	0	-1.3716	0	-2.8473	0	-3.5166	0	-5.4718	0	-6.5913	0	-14.6361	0	-15.4286
	UCR_ENT 00039910		16.4395	15.6267	3.0378	0.969	1.6421	0.802	2.1298	1.2453	6.02314	1.76569	4.48645	1.28295	6.32997	6.68037	4.77654	5.58911	5.74737	6.93998	1.04848	1.84557	0.434931	1.2788	0.7258	1.9247	4.1618	3.9795	0.416	0.3823	0.3162	0	0	0	-0.969	0	-1.3957	0	-3.0378	0	-3.8398	0	-5.9696	0	-7.2149	0	-15.6267	0	-16.4395
	UCR_ENT 00014442	LenAnte-4 missing. LB is obstructed.	15.889	15.0558	2.8588	1.1093	1.2542	0.7143	2.0974	1.2961	5.54489	1.71919	4.40232	N/A	5.91863	6.28777	4.90397	5.37456	5.76596	6.70217	N/A	N/A	N/A	1.1366	0.6566	1.851	3.9548	2.7502	0.3746	0.386	0.2528	0	0	0	-1.1093	0	-1.6046	0	-2.8588	0	-3.5731	0	-5.6705	0	-6.9666	0	-15.0558	0	-15.889
	UCR_ENT 00031113	Keeps moving	16.4109	15.567	2.7667	0.8458	1.3576	0.8579	1.8929	1.5367	0	0	0	0	0	0	0	0	0	0	0	0	0	1.2275	0.7423	1.8764	4.7561	2.6568	N/A	N/A	N/A	0	0	0	-0.8458	0	-1.4091	0	-2.7667	0	-3.6246	0	-5.5175	0	-7.0542	0	-15.567	0	-16.4109
			0	0	0	0	0	0	0	0	0	0	0	0	0	0	0	0	0	0	0	0	0	0	0	0	0	0	0	0	0
			0	0	0	0	0	0	0	0	0	0	0	0	0	0	0	0	0	0	0	0	0	0	0	0	0	0	0	0	0
			0	0	0	0	0	0	0	0	0	0	0	0	0	0	0	0	0	0	0	0	0	0	0	0	0	0	0	0	0
			0	0	0	0	0	0	0	0	0	0	0	0	0	0	0	0	0	0	0	0	0	0	0	0	0	0	0	0	0
			0	0	0	0	0	0	0	0	0	0	0	0	0	0	0	0	0	0	0	0	0	0	0	0	0	0	0	0	0
	Mean		16.5517	15.7344	2.99642	1.00722	1.49618	0.78714	2.08814	1.37148	4.38585	1.38752	3.59571	0.641477	4.95754	5.30685	4.02188	4.44166	4.78852	5.68646	0.778912	1.41766	0.331906	1.20584	0.67526	1.7742	4.22934	3.05142	0.3921	0.4091	0.30195
	Standard Deviation		1.21335	1.21621	0.283443	0.138667	0.202828	0.0941506	0.183362	0.129384	2.9318	0.93764	2.44792	0.907185	2.9231	3.11875	2.5064	2.58327	2.83934	3.37309	0.528498	0.960571	0.221681	0.0924864	0.102659	0.168092	0.374012	0.577214	0.0301221	0.0331706	0.0393851
	Range		3.1617	3.1502	0.7048	0.341	0.4971	0.2229	0.4725	0.2914	6.02314	2.06522	5.49408	1.28295	7.56393	8.11283	6.75728	6.61982	7.5137	8.93347	1.15367	2.1192	0.461488	0.2159	0.2444	0.4146	0.9233	1.3588	0.0604	0.0718	0.0933
	Minimum		15.4286	14.6361	2.7667	0.8458	1.2542	0.6693	1.8929	1.2453	0	0	0	0	0	0	0	0	0	0	0	0	0	1.0852	0.5036	1.5101	3.8328	2.6207	0.3587	0.3823	0.2528
	Maximum		18.5903	17.7863	3.4715	1.1868	1.7513	0.8922	2.3654	1.5367	6.02314	2.06522	5.49408	1.28295	7.56393	8.11283	6.75728	6.61982	7.5137	8.93347	1.15367	2.1192	0.461488	1.3011	0.748	1.9247	4.7561	3.9795	0.4191	0.4541	0.3461
	Count		5	5	5	5	5	5	5	4	4	4	4	2	5	5	5	5	5	5	4	4	4	5	5	5	5	5	4	4	4
[truncated: 70 more columns]

## Sheet: annulosus
	Males	Notes																														1		2		3		4		5		6		7		8		9
	SPECIMEN		Total Leng	Clyp-Abd	LenHead	LenAntOc	LenPostOc	LenAntPron	LenPostPron	LenScut	LenScap	LenPed	LenAnte-3	LenAnte-4	LenFF	LenFT	LenMF	LenMT	LenHF	LenHT	LenLB1	LenLB2	LenLB3	WidHead	InterOcDi	WidAntPrn	WidPosPrn	WidAbd	WidFF	WidMF	WidHF	xpt1	ypt1	xpt2	ypt2	xpt3	ypt3	xpt4	ypt4	xpt5	ypt5	xpt6	ypt6	xpt7	ypt7	xpt8	ypt8	xpt9	ypt9
	UCR_ENT 46743	LenAnte-4 missing	14.572	13.4537	3.0829	0.8306	1.7246	0.7201	1.7571	1.1277	9.20592	2.85583	7.53663	N/A	8.27656	8.80425	6.42939	7.8001	7.62063	10.0685	1.49488	2.26234	0.549358	1.4466	0.7036	1.7069	3.0911	2.1958	0.2717	0.2635	0.2191	0	0	0	-0.8306	0	-1.3583	0	-3.0829	0	-3.803	0	-5.5601	0	-6.6878	0	-13.4537	0	-14.572
			0	0	0	0	0	0	0	0	0	0	0	0	0	0	0	0	0	0	0	0	0	0	0	0	0	0	0	0	0
			0	0	0	0	0	0	0	0	0	0	0	0	0	0	0	0	0	0	0	0	0	0	0	0	0	0	0	0	0
			0	0	0	0	0	0	0	0	0	0	0	0	0	0	0	0	0	0	0	0	0	0	0	0	0	0	0	0	0
			0	0	0	0	0	0	0	0	0	0	0	0	0	0	0	0	0	0	0	0	0	0	0	0	0	0	0	0	0
			0	0	0	0	0	0	0	0	0	0	0	0	0	0	0	0	0	0	0	0	0	0	0	0	0	0	0	0	0
			0	0	0	0	0	0	0	0	0	0	0	0	0	0	0	0	0	0	0	0	0	0	0	0	0	0	0	0	0
			0	0	0	0	0	0	0	0	0	0	0	0	0	0	0	0	0	0	0	0	0	0	0	0	0	0	0	0	0
			0	0	0	0	0	0	0	0	0	0	0	0	0	0	0	0	0	0	0	0	0	0	0	0	0	0	0	0	0
			0	0	0	0	0	0	0	0	0	0	0	0	0	0	0	0	0	0	0	0	0	0	0	0	0	0	0	0	0
	Mean		14.572	13.4537	3.0829	0.8306	1.7246	0.7201	1.7571	1.1277	9.20592	2.85583	7.53663	#DIV/0!	8.27656	8.80425	6.42939	7.8001	7.62063	10.0685	1.49488	2.26234	0.549358	1.4466	0.7036	1.7069	3.0911	2.1958	0.2717	0.2635	0.2191
	Standard Deviation		#DIV/0!	#DIV/0!	#DIV/0!	#DIV/0!	#DIV/0!	#DIV/0!	#DIV/0!	#DIV/0!	#DIV/0!	#DIV/0!	#DIV/0!	#DIV/0!	#DIV/0!	#DIV/0!	#DIV/0!	#DIV/0!	#DIV/0!	#DIV/0!	#DIV/0!	#DIV/0!	#DIV/0!	#DIV/0!	#DIV/0!	#DIV/0!	#DIV/0!	#DIV/0!	#DIV/0!	#DIV/0!	#DIV/0!
	Range		0	0	0	0	0	0	0	0	0	0	0	0	0	0	0	0	0	0	0	0	0	0	0	0	0	0	0	0	0																.
	Minimum		14.572	13.4537	3.0829	0.8306	1.7246	0.7201	1.7571	1.1277	9.20592	2.85583	7.53663	0	8.27656	8.80425	6.42939	7.8001	7.62063	10.0685	1.49488	2.26234	0.549358	1.4466	0.7036	1.7069	3.0911	2.1958	0.2717	0.2635	0.2191
	Maximum		14.572	13.4537	3.0829	0.8306	1.7246	0.7201	1.7571	1.1277	9.20592	2.85583	7.53663	0	8.27656	8.80425	6.42939	7.8001	7.62063	10.0685	1.49488	2.26234	0.549358	1.4466	0.7036	1.7069	3.0911	2.1958	0.2717	0.2635	0.2191
	Count		1	1	1	1	1	1	1	1	1	1	1	0	1	1	1	1	1	1	1	1	1	1	1	1	1	1	1	1	1
	Females																															1		2		3		4		5		6		7		8		9
	SPECIMEN		Total Leng	Clyp-Abd	LenHead	LenAntOc	LenPostOc	LenAntPron	LenPostPron	LenScut	LenScap	LenPed	LenAnte-3	LenAnte-4	LenFF	LenFT	LenMF	LenMT	LenHF	LenHT	LenLB1	LenLB2	LenLB3	WidHead	InterOcDi	WidAntPrn	WidPosPrn	WidAbd	WidFF	WidMF	WidHF	xpt1	ypt1	xpt2	ypt2	xpt3	ypt3	xpt4	ypt4	xpt5	ypt5	xpt6	ypt6	xpt7	ypt7	xpt8	ypt8	xpt9	ypt9
	UCR_ENT 00038420		21.1919	20.4216	4.7949	1.5507	2.5381	1.0312	2.406	1.5761	10.529	3.37684	10.0972	2.32684	10.0817	9.56013	8.20341	9.14865	10.1231	10.5072	1.85339	3.00124	0.486166	1.7564	0.8509	1.9819	3.9789	2.1419	0.3823	0.3397	0.3512	0	0	0	-1.5507	0	-2.2568	0	-4.7949	0	-5.8261	0	-8.2321	0	-9.8082	0	-20.4216	0	-21.1919
	UCR_ENT 00017766	LenAnte-4 missing	22.7241	21.8078	5.0025	1.7513	2.5508	1.0471	2.6689	1.6352	10.7802	3.4355	7.3061	N/A	10.8497	10.9003	7.85906	9.65657	10.1132	11.2692	2.04505	3.00139	0.602962	1.7272	0.9455	2.246	4.4247	3.168	0.3727	0.3708	0.3296	0	0	0	-1.7513	0	-2.4517	0	-5.0025	0	-6.0496	0	-8.7185	0	-10.3537	0	-21.8078	0	-22.7241
	UCR_ENT 00009269	no antenna. F leg missing	21.8116	19.9244	4.9028	1.7462	2.5438	1.1126	2.4561	1.2091	N/A	N/A	N/A	N/A	N/A	N/A	7.81984	8.15961	8.62221	12.0312	1.77565	2.82968	0.527709	1.6339	0.9499	2.1571	4.1504	3.2703	N/A	0.362	0.2807	0	0	0	-1.7462	0	-2.359	0	-4.9028	0	-6.0154	0	-8.4715	0	-9.6806	0	-19.9244	0	-21.8116
			0	0	0	0	0	0	0	0	0	0	0	0	0	0	0	0	0	0	0	0	0	0	0	0	0	0	0	0	0
			0	0	0	0	0	0	0	0	0	0	0	0	0	0	0	0	0	0	0	0	0	0	0	0	0	0	0	0	0
			0	0	0	0	0	0	0	0	0	0	0	0	0	0	0	0	0	0	0	0	0	0	0	0	0	0	0	0	0
			0	0	0	0	0	0	0	0	0	0	0	0	0	0	0	0	0	0	0	0	0	0	0	0	0	0	0	0	0
			0	0	0	0	0	0	0	0	0	0	0	0	0	0	0	0	0	0	0	0	0	0	0	0	0	0	0	0	0
			0	0	0	0	0	0	0	0	0	0	0	0	0	0	0	0	0	0	0	0	0	0	0	0	0	0	0	0	0
			0	0	0	0	0	0	0	0	0	0	0	0	0	0	0	0	0	0	0	0	0	0	0	0	0	0	0	0	0
	Mean		21.9092	20.7179	4.90007	1.68273	2.54423	1.06363	2.51033	1.47347	10.6546	3.40617	8.70165	2.32684	10.4657	10.2302	7.96077	8.98828	9.61951	11.2692	1.89136	2.9441	0.538946	1.70583	0.915433	2.12833	4.18467	2.86007	0.3775	0.3575	0.3205
	Standard Deviation		0.770749	0.976043	0.103827	0.114373	0.00636108	0.0431451	0.139589	0.230847	0.177641	0.0414826	1.97361	#DIV/0!	0.543039	0.947614	0.211044	0.761259	0.863706	0.762005	0.13866	0.0990971	0.0592031	0.0639841	0.0559308	0.134379	0.224867	0.62405	0.00678823	0.0160309	0.0361202
	Range		1.5322	1.8834	0.2076	0.2006	0.0127	0.0814	0.2629	0.4261	0.251223	0.0586653	2.7911	0	0.767973	1.34013	0.383564	1.49696	1.50089	1.52401	0.269407	0.171718	0.116796	0.1225	0.099	0.2641	0.4458	1.1284	0.0096	0.0311	0.0705
	Minimum		21.1919	19.9244	4.7949	1.5507	2.5381	1.0312	2.406	1.2091	10.529	3.37684	7.3061	2.32684	10.0817	9.56013	7.81984	8.15961	8.62221	10.5072	1.77565	2.82968	0.486166	1.6339	0.8509	1.9819	3.9789	2.1419	0.3727	0.3397	0.2807
	Maximum		22.7241	21.8078	5.0025	1.7513	2.5508	1.1126	2.6689	1.6352	10.7802	3.4355	10.0972	2.32684	10.8497	10.9003	8.20341	9.65657	10.1231	12.0312	2.04505	3.00139	0.602962	1.7564	0.9499	2.246	4.4247	3.2703	0.3823	0.3708	0.3512
	Count		3	3	3	3	3	3	3	3	2	2	2	1	2	2	3	3	3	3	3	3	3	3	3	3	3	3	2	3	3
			4.95694	0.505151
[truncated: 70 more columns]

## Sheet: antiguensis
	Males																															1		2		3		4		5		6		7		8		9
	SPECIMEN	Notes	Total Leng	Clyp-Abd	LenHead	LenAntOc	LenPostOc	LenAntPron	LenPostPron	LenScut	LenScap	LenPed	LenAnte-3	LenAnte-4	LenFF	LenFT	LenMF	LenMT	LenHF	LenHT	LenLB1	LenLB2	LenLB3	WidHead	InterOcDi	WidAntPrn	WidPosPrn	WidAbd	WidFF	WidMF	WidHF	xpt1	ypt1	xpt2	ypt2	xpt3	ypt3	xpt4	ypt4	xpt5	ypt5	xpt6	ypt6	xpt7	ypt7	xpt8	ypt8	xpt9	ypt9
	UCR_ENT 00007995	3rd segment is broken and LenAnte-4 missing. F legs missing on bothsides.	13.6868	11.985	2.4651	0.6985	1.3812	0.7162	1.5069	1.19	5.61317	1.45128	N/A	N/A	N/A	N/A	3.95946	5.05016	5.13369	6.09025	0.874928	1.51997	0.43779	1.0928	0.4991	1.4401	2.9343	1.4802	0	0.2572	0.2381	0	0	0	-0.6985	0	-1.0839	0	-2.4651	0	-3.1813	0	-4.6882	0	-5.8782	0	-11.985	0	-13.6868
	UCR_ENT 00029479	LenAnte-4 missing	16.2814	15.3778	2.8486	0.8928	1.3932	0.8808	1.8192	1.1672	6.14378	1.72483	6.31772	1.04951	5.8423	6.32711	4.70377	5.61996	6.20442	7.89992	0.831152	1.56033	0.522055	1.2319	0.5391	1.538	3.6436	2.1298	0.3035	0.3061	0.2642	0	0	0	-0.8928	0	-1.4554	0	-2.8486	0	-3.7294	0	-5.5486	0	-6.7158	0	-15.3778	0	-16.2814
			0	0	0	0	0	0	0	0	0	0	0	0	0	0	0	0	0	0	0	0	0	0	0	0	0	0	0	0	0
			0	0	0	0	0	0	0	0	0	0	0	0	0	0	0	0	0	0	0	0	0	0	0	0	0	0	0	0	0
			0	0	0	0	0	0	0	0	0	0	0	0	0	0	0	0	0	0	0	0	0	0	0	0	0	0	0	0	0
			0	0	0	0	0	0	0	0	0	0	0	0	0	0	0	0	0	0	0	0	0	0	0	0	0	0	0	0	0
			0	0	0	0	0	0	0	0	0	0	0	0	0	0	0	0	0	0	0	0	0	0	0	0	0	0	0	0	0
			0	0	0	0	0	0	0	0	0	0	0	0	0	0	0	0	0	0	0	0	0	0	0	0	0	0	0	0	0
			0	0	0	0	0	0	0	0	0	0	0	0	0	0	0	0	0	0	0	0	0	0	0	0	0	0	0	0	0
			0	0	0	0	0	0	0	0	0	0	0	0	0	0	0	0	0	0	0	0	0	0	0	0	0	0	0	0	0
	Mean		14.9841	13.6814	2.65685	0.79565	1.3872	0.7985	1.66305	1.1786	5.87848	1.58805	6.31772	1.04951	5.8423	6.32711	4.33161	5.33506	5.66905	6.99509	0.85304	1.54015	0.479923	1.16235	0.5191	1.48905	3.28895	1.805	0.15175	0.28165	0.25115
	Standard Deviation		1.83466	2.39907	0.271175	0.137391	0.00848528	0.11639	0.220829	0.016122	0.375195	0.193428	#DIV/0!	#DIV/0!	#DIV/0!	#DIV/0!	0.526313	0.402911	0.75712	1.27963	0.0309544	0.028538	0.0595846	0.0983586	0.0282843	0.0692258	0.501551	0.459337	0.214607	0.0345775	0.0184555
	Range		2.5946	3.3928	0.3835	0.1943	0.012	0.1646	0.3123	0.0228	0.530605	0.273549	0	0	0	0	0.744318	0.569802	1.07073	1.80967	0.0437762	0.0403588	0.0842654	0.1391	0.04	0.0979	0.7093	0.6496	0.3035	0.0489	0.0261																.
	Minimum		13.6868	11.985	2.4651	0.6985	1.3812	0.7162	1.5069	1.1672	5.61317	1.45128	6.31772	1.04951	5.8423	6.32711	3.95946	5.05016	5.13369	6.09025	0.831152	1.51997	0.43779	1.0928	0.4991	1.4401	2.9343	1.4802	0	0.2572	0.2381
	Maximum		16.2814	15.3778	2.8486	0.8928	1.3932	0.8808	1.8192	1.19	6.14378	1.72483	6.31772	1.04951	5.8423	6.32711	4.70377	5.61996	6.20442	7.89992	0.874928	1.56033	0.522055	1.2319	0.5391	1.538	3.6436	2.1298	0.3035	0.3061	0.2642
	Count		2	2	2	2	2	2	2	2	2	2	1	1	1	1	2	2	2	2	2	2	2	2	2	2	2	2	2	2	2
	Females																															1		2		3		4		5		6		7		8		9
	SPECIMEN		Total Leng	Clyp-Abd	LenHead	LenAntOc	LenPostOc	LenAntPron	LenPostPron	LenScut	LenScap	LenPed	LenAnte-3	LenAnte-4	LenFF	LenFT	LenMF	LenMT	LenHF	LenHT	LenLB1	LenLB2	LenLB3	WidHead	InterOcDi	WidAntPrn	WidPosPrn	WidAbd	WidFF	WidMF	WidHF	xpt1	ypt1	xpt2	ypt2	xpt3	ypt3	xpt4	ypt4	xpt5	ypt5	xpt6	ypt6	xpt7	ypt7	xpt8	ypt8	xpt9	ypt9
	UCR_ENT 00015069	No antenna	15.8471	15.2927	2.8442	0.8172	1.5304	0.8293	1.8256	1.4783	N/A	N/A	N/A	N/A	6.22008	6.61976	3.35176	4.86685	5.96357	8.20227	0.938759	1.65325	0.310359	1.223	0.621	1.5551	3.7319	3.3033	0.3969	0.4076	0.3118	0	0	0	-0.8172	0	-1.3138	0	-2.8442	0	-3.6735	0	-5.4991	0	-6.9774	0	-15.2927	0	-15.8471
	UCR_ENT 00038423		18.1527	17.6486	3.2937	1.0458	1.7043	0.9132	2.3215	1.4688	6.92483	2.21921	5.54514	0.890696	6.99078	7.64366	5.31338	6.13108	7.35153	8.41726	1.01506	1.96217	0.521772	1.2846	0.7011	1.8276	4.2545	2.4644	0.3975	0.4356	0.3207	0	0	0	-1.0458	0	-1.5894	0	-3.2937	0	-4.2069	0	-6.5284	0	-7.9972	0	-17.6486	0	-18.1527
	UCR_ENT 00023699	LenAnte-4 missing. Hind leg missing on leftside. Front and hind leg missing on rightside.	17.9991	17.2942	2.8797	0.9703	1.4681	0.7315	1.8746	2.0929	7.02194	2.15568	5.80807	N/A	6.9008	7.48995	4.89187	6.32336	N/A	N/A	1.10638	1.93076	0.533782	1.2592	0.694	1.7583	4.7854	2.465	0.4356	0.449	N/A	0	0	0	-0.9703	0	-1.4116	0	-2.8797	0	-3.6112	0	-5.4858	0	-7.5787	0	-17.2942	0	-17.9991
	UCR_ENT 00019699	LenAnte-4 missing.	16.797	15.7169	3.0207	1.0636	1.39	0.8401	2.0872	1.2758	6.1523	1.79704	5.62394	N/A	6.55643	7.09942	4.52084	5.87409	6.27695	7.50988	0.806074	1.73379	0.440293	1.1735	0.6039	1.7088	4.1796	3.2385	0.3931	0.3633	0.2883	0	0	0	-1.0636	0	-1.6307	0	-3.0207	0	-3.8608	0	-5.948	0	-7.2238	0	-15.7169	0	-16.797
	UCR_ENT 00029478	No antenna	15.7734	15.4203	2.8404	0.9106	1.3475	0.7588	1.7856	1.2573	N/A	N/A	N/A	N/A	6.17356	6.41214	4.45582	5.33929	6.01429	7.33115	0.894987	1.62291	0.391915	1.2236	0.5727	1.583	3.1141	3.0448	0.3563	0.3505	0.2864	0	0	0	-0.9106	0	-1.4929	0	-2.8404	0	-3.5992	0	-5.3848	0	-6.6421	0	-15.4203	0	-15.7734
			0	0	0	0	0	0	0	0	0	0	0	0	0	0	0	0	0	0	0	0	0	0	0	0	0	0	0	0	0
			0	0	0	0	0	0	0	0	0	0	0	0	0	0	0	0	0	0	0	0	0	0	0	0	0	0	0	0	0
			0	0	0	0	0	0	0	0	0	0	0	0	0	0	0	0	0	0	0	0	0	0	0	0	0	0	0	0	0
			0	0	0	0	0	0	0	0	0	0	0	0	0	0	0	0	0	0	0	0	0	0	0	0	0	0	0	0	0
			0	0	0	0	0	0	0	0	0	0	0	0	0	0	0	0	0	0	0	0	0	0	0	0	0	0	0	0	0
	Mean		16.9139	16.2745	2.97574	0.997575	1.48806	0.81458	1.9789	1.51462	6.69969	2.05731	5.65905	0.890696	6.56833	7.05299	4.50674	5.70694	6.40158	7.86514	0.952252	1.78058	0.439624	1.23278	0.63854	1.68656	4.0131	2.9032	0.39588	0.4012	0.3018
	Standard Deviation		1.1363	1.11046	0.19233	0.0706954	0.139932	0.0717766	0.22408	0.339512	0.476533	0.227629	0.134938	#DIV/0!	0.376253	0.533938	0.730713	0.597646	0.648016	0.52594	0.114597	0.157156	0.0930054	0.0420635	0.0566393	0.115693	0.626442	0.411437	0.0280876	0.0433476	0.0170941
	Range		2.3793	2.3559	0.4533	0.153	0.3568	0.1817	0.5359	0.8356	0.869641	0.422175	0.262936	0	0.817217	1.23152	1.96162	1.45651	1.38796	1.0861	0.300307	0.339264	0.223422	0.1111	0.1284	0.2725	1.6713	0.8389	0.0793	0.0985	0.0343
	Minimum		15.7734	15.2927	2.8404	0.9106	1.3475	0.7315	1.7856	1.2573	6.1523	1.79704	5.54514	0.890696	6.17356	6.41214	3.35176	4.86685	5.96357	7.33115	0.806074	1.62291	0.310359	1.1735	0.5727	1.5551	3.1141	2.4644	0.3563	0.3505	0.2864
	Maximum		18.1527	17.6486	3.2937	1.0636	1.7043	0.9132	2.3215	2.0929	7.02194	2.21921	5.80807	0.890696	6.99078	7.64366	5.31338	6.32336	7.35153	8.41726	1.10638	1.96217	0.533782	1.2846	0.7011	1.8276	4.7854	3.3033	0.4356	0.449	0.3207
	Count		5	5	5	4	5	5	5	5	3	3	3	1	5	5	5	5	4	4	5	5	5	5	5	5	5	5	5	5	4
				0.403595
[truncated: 70 more columns]

## Sheet: armillatus
	Males	Notes																														1		2		3		4		5		6		7		8		9
	SPECIMEN		Total Leng	Clyp-Abd	LenHead	LenAntOc	LenPostOc	LenAntPron	LenPostPron	LenScut	LenAnte-1	LenAnte-2	LenAnte-3	LenAnte-4	LenFF	LenFT	LenMF	LenMT	LenHF	LenHT	LenLB1	LenLB2	LenLB3	WidHead	InterOcDi	WidAntPrn	WidPosPrn	WidAbd	WidFF	WidMF	WidHF	xpt1	ypt1	xpt2	ypt2	xpt3	ypt3	xpt4	ypt4	xpt5	ypt5	xpt6	ypt6	xpt7	ypt7	xpt8	ypt8	xpt9	ypt9
	UCR_ENT 00030811	F leg seems damaged on rightside. F leg missing on leftside	17.8327	16.9354	3.3217	1.089	1.672	0.795	2.0968	1.6567	7.61081	2.61149	6.30887	2.06004	7.36908	7.09092	5.6935	5.45858	7.5106	8.58285	1.47965	1.89346	0.660611	1.2681	0.8382	2.1596	4.2456	3.5185	0.4979	0.435	0.346	0	0	0	-1.089	0	-1.6497	0	-3.3217	0	-4.1167	0	-6.2135	0	-7.8702	0	-16.9354	0	-17.8327
	UCR_ENT 00029506		19.0189	17.4815	3.502	1.1652	1.7634	1.2948	2.4733	1.8841	7.6088	2.62297	7.59919	2.42633	7.88401	8.49211	5.59558	6.62994	7.61299	9.32177	1.47381	2.0713	0.581955	1.5011	0.9964	2.4048	4.7955	3.7122	0.5607	0.5582	0.435	0	0	0	-1.1652	0	-1.7386	0	-3.502	0	-4.7968	0	-7.2701	0	-9.1542	0	-17.4815	0	-19.0189
	UCR_ENT 00029488		18.055	17.4796	3.3255	1.204	1.5069	0.9842	2.3508	1.1367	8.04053	2.53073	5.77043	1.99514	6.82672	7.83432	5.1568	6.3846	7.69736	8.70206	1.32837	2.01124	0.619992	1.5488	0.6852	2.2727	4.624	3.763	0.4972	0.4362	0.428	0	0	0	-1.204	0	-1.8186	0	-3.3255	0	-4.3097	0	-6.6605	0	-7.7972	0	-17.4796	0	-18.055
	UCR_ENT 00025946	LenAnte-4 missing	17.2885	15.5111	3.2321	1.0535	1.5779	1.0586	2.5006	1.19	5.64581	1.95869	4.29337	N/A	6.39878	6.54306	4.54776	5.07411	5.75724	6.65198	1.16762	1.82554	0.409479	1.3024	0.7016	2.0593	4.5841	3.3566	0.4737	0.468	0.3956	0	0	0	-1.0535	0	-1.6542	0	-3.2321	0	-4.2907	0	-6.7913	0	-7.9813	0	-15.5111	0	-17.2885
	UCR_ENT 00030759		17.1501	16.2147	3.1509	1.0547	1.4434	0.9417	2.1691	1.8873	7.30464	2.51741	6.23189	2.12383	6.71362	7.64975	5.65847	6.27717	7.91176	8.75768	1.30334	2.0232	0.56181	1.3983	0.7252	2.0282	4.1751	2.7997	0.4738	0.4153	0.3823	0	0	0	-1.0547	0	-1.7075	0	-3.1509	0	-4.0926	0	-6.2617	0	-8.149	0	-16.2147	0	-17.1501
			0	0	0	0	0	0	0	0	0	0	0	0	0	0	0	0	0	0	0	0	0	0	0	0	0	0	0	0	0
			0	0	0	0	0	0	0	0	0	0	0	0	0	0	0	0	0	0	0	0	0	0	0	0	0	0	0	0	0
			0	0	0	0	0	0	0	0	0	0	0	0	0	0	0	0	0	0	0	0	0	0	0	0	0	0	0	0	0
	Mean		17.869	16.7245	3.30644	1.11328	1.59272	1.01486	2.31812	1.55096	7.6412	2.57065	6.04075	2.15134	7.03844	7.52203	5.33042	5.96488	7.29799	8.40327	1.35056	1.96495	0.566769	1.40374	0.73755	2.18492	4.48486	3.58758	0.50066	0.46254	0.39738
	Standard Deviation		0.743637	0.854392	0.130919	0.0680452	0.127768	0.183651	0.180026	0.366467	0.302605	0.0542609	1.18991	0.190713	0.588176	0.741474	0.487968	0.664419	0.873865	1.01953	0.130429	0.101723	0.0957005	0.121675	0.0690794	0.155752	0.264056	0.186571	0.0356114	0.0567109	0.0361363
	Range		1.8688	1.9704	0.3511	0.1505	0.32	0.4998	0.4038	0.7506	0.735887	0.10556	3.30582	0.431197	1.48522	1.94905	1.14574	1.55583	2.15453	2.66979	0.312037	0.245755	0.251132	0.2807	0.153	0.3766	0.6204	0.4064	0.087	0.1429	0.089																.
	Minimum		17.1501	15.5111	3.1509	1.0535	1.4434	0.795	2.0968	1.1367	7.30464	2.51741	4.29337	1.99514	6.39878	6.54306	4.54776	5.07411	5.75724	6.65198	1.16762	1.82554	0.409479	1.2681	0.6852	2.0282	4.1751	3.3566	0.4737	0.4153	0.346
	Maximum		19.0189	17.4815	3.502	1.204	1.7634	1.2948	2.5006	1.8873	8.04053	2.62297	7.59919	2.42633	7.88401	8.49211	5.6935	6.62994	7.91176	9.32177	1.47965	2.0713	0.660611	1.5488	0.8382	2.4048	4.7955	3.763	0.5607	0.5582	0.435
	Count		5	5	5	5	5	5	5	5	4	4	5	4	5	5	5	5	5	5	5	5	5	5	4	5	5	4	5	5	5
	Females										LenAnte-1	LenAnte-2																				1		2		3		4		5		6		7		8		9
	SPECIMEN		Total Leng	Clyp-Abd	LenHead	LenAntOc	LenPostOc	LenAntPron	LenPostPron	LenScut	LenScap	LenPed	LenAnte-3	LenAnte-4	LenFF	LenFT	LenMF	LenMT	LenHF	LenHT	LenLB1	LenLB2	LenLB3	WidHead	InterOcDi	WidAntPrn	WidPosPrn	WidAbd	WidFF	WidMF	WidHF	xpt1	ypt1	xpt2	ypt2	xpt3	ypt3	xpt4	ypt4	xpt5	ypt5	xpt6	ypt6	xpt7	ypt7	xpt8	ypt8	xpt9	ypt9
	UCR_ENT 00029580		22.312	21.2712	4.0411	1.3322	2.0701	1.0427	3.2614	2.1945	8.23606	3.14017	6.07283	N/A	8.73967	8.77566	6.52527	7.64715	8.71975	10.6937	1.7086	2.09401	0.595026	1.7291	0.9798	3.1147	7.086	6.8936	0.6794	0.6693	0.529	0	0	0	-1.3322	0	-1.971	0	-4.0411	0	-5.0838	0	-8.3452	0	-10.5397	0	-21.2712	0	-22.312
	UCR_ENT 00030732		21.3347	20.2952	3.7059	1.4008	1.7285	1.1576	2.9451	1.4465	9.01524	3.27071	7.00082	N/A	8.79587	9.21331	6.70913	7.35391	8.92145	10.7182	1.43248	2.26896	0.545198	1.606	0.915	2.2288	5.2946	4.3611	0.6147	0.5829	0.4496	0	0	0	-1.4008	0	-1.9774	0	-3.7059	0	-4.8635	0	-7.8086	0	-9.2551	0	-20.2952	0	-21.3347
	UCR_ENT 47622		23.067	22.0516	4.057	1.2814	2.1539	1.2135	3.0829	1.3126	8.5072	2.71343	6.19322	2.18093	9.08541	9.18799	6.93268	7.20254	8.27135	9.90206	1.56247	2.25002	0.521938	1.724	1.0064	2.8302	6.2776	5.3347	0.5905	0.7163	0.5042	0	0	0	-1.2814	0	-1.9031	0	-4.057	0	-5.2705	0	-8.3534	0	-9.666	0	-22.0516	0	-23.067
	UCR_ENT 00017774		24.7428	23.3655	4.6596	1.6459	2.265	1.2859	3.5744	1.7653	10.2169	3.05127	4.67761	N/A	10.1105	10.1721	7.00689	7.87288	9.55342	10.3523	1.87846	2.31677	0.527672	1.8218	1.1284	3.2779	6.5272	7.2632	0.6394	0.7258	0.5398	0	0	0	-1.6459	0	-2.3946	0	-4.6596	0	-5.9455	0	-9.5199	0	-11.2852	0	-23.3655	0	-24.7428
	UCR_ENT 00030717		19.0379	17.6473	3.6551	1.2109	1.8828	1.31	2.7165	1.1449	7.51466	2.4502	2.79398	N/A	8.14218	8.57565	5.52837	6.22203	7.42273	9.139	1.7719	1.91173	0.399326	1.4447	0.856	2.601	5.9354	5.8566	0.5448	0.5664	0.4204	0	0	0	-1.2109	0	-1.7723	0	-3.6551	0	-4.9651	0	-7.6816	0	-8.8265	0	-17.6473	0	-19.0379
	UCR_ENT 00029496		20.5797	20.3664	3.6366	1.3252	1.663	1.143	2.7274	1.5094	8.60646	2.66122	4.58673	N/A	8.00368	8.78091	5.50161	7.13695	8.00314	9.2976	1.55419	2.2337	0.67236	1.7412	0.9067	2.5228	5.5785	5.1911	0.5766	0.4743	0.4375	0	0	0	-1.3252	0	-1.9736	0	-3.6366	0	-4.7796	0	-7.507	0	-9.0164	0	-20.3664	0	-20.5797
	UCR_ENT 00030716		22.3139	21.0052	4.8457	1.6345	2.5076	3.3248	1.6148	0.3188	8.21216	2.86752	6.87877	N/A	9.52889	9.90114	6.37302	7.3792	8.50612	10.1619	1.74048	2.33016	0.494198	1.7241	0.8407	2.5889	7.0307	5.0952	0.7893	0.6909	0.4985	0	0	0	-1.6345	0	-2.3381	0	-4.8457	0	-8.1705	0	-9.7853	0	-10.1041	0	-21.0052	0	-22.3139
	UCR_ENT 00023665		21.9545	20.2648	3.7027	1.2529	1.7704	1.2706	3.0563	1.4497	8.47749	2.59913	6.65533	N/A	8.80775	9.501	6.17097	7.19344	7.8097	8.64355	1.73044	2.30131	0.601828	1.5062	0.9512	2.6308	6.3855	5.9785	0.6496	0.4153	0.4179	0	0	0	-1.2529	0	-1.9323	0	-3.7027	0	-4.9733	0	-8.0296	0	-9.4793	0	-20.2648	0	-21.9545
	UCR_ENT 00015087		22.3514	21.7538	4.2107	1.5583	2.0581	1.43	3.1426	1.7317	8.974	2.62949	7.34062	2.01601	9.28152	9.74825	6.91201	7.80018	9.23994	10.8775	1.89364	2.46518	0.551243	1.6866	0.9373	3.1636	6.5652	4.8387	0.656	0.6877	0.503	0	0	0	-1.5583	0	-2.1526	0	-4.2107	0	-5.6407	0	-8.7833	0	-10.515	0	-21.7538	0	-22.3514
			0	0	0	0	0	0	0	0	0	0	0	0	0	0	0	0	0	0	0	0	0	0	0	0	0	0	0	0	0
	Mean		21.966	20.8912	4.05716	1.40468	2.01104	1.23166	3.06333	1.56933	8.64002	2.82035	5.79999	2.09847	8.94394	9.31733	6.40666	7.31203	8.49418	9.9762	1.69696	2.24132	0.545421	1.66486	0.946833	2.77319	6.29786	5.64586	0.618875	0.614322	0.477767
	Standard Deviation		1.58928	1.57782	0.44667	0.166574	0.276698	0.119113	0.281389	0.323959	0.741355	0.27834	1.48777	0.116618	0.656326	0.553361	0.57501	0.489416	0.690926	0.790289	0.153629	0.157528	0.0763412	0.122051	0.0864945	0.348205	0.606812	0.951096	0.0455187	0.111578	0.0468081
	Range		5.7049	5.7182	1.2091	0.435	0.8446	0.3873	0.8579	1.0496	2.70227	0.820507	4.54664	0.164923	2.10682	1.59644	1.50528	1.65085	2.13069	2.23391	0.461167	0.553444	0.273034	0.3771	0.2877	1.0491	1.7914	2.9021	0.1346	0.3105	0.1219
	Minimum		19.0379	17.6473	3.6366	1.2109	1.663	1.0427	2.7165	1.1449	7.51466	2.4502	2.79398	2.01601	8.00368	8.57565	5.50161	6.22203	7.42273	8.64355	1.43248	1.91173	0.399326	1.4447	0.8407	2.2288	5.2946	4.3611	0.5448	0.4153	0.4179
	Maximum		24.7428	23.3655	4.8457	1.6459	2.5076	1.43	3.5744	2.1945	10.2169	3.27071	7.34062	2.18093	10.1105	10.1721	7.00689	7.87288	9.55342	10.8775	1.89364	2.46518	0.67236	1.8218	1.1284	3.2779	7.086	7.2632	0.6794	0.7258	0.5398
	Count		9	9	9	9	9	8	8	8	9	9	9	2	9	9	9	9	9	9	9	9	9	9	9	9	9	9	8	9	9
[truncated: 70 more columns]

## Sheet: auralanus
Males	Notes																														1		2		3		4		5		6		7		8		9		10
SPECIMEN		Total Leng	Clyp-Abd	LenHead	LenAntOc	LenPostOc	LenAntPron	LenPostPron	LenScut	LenScap	LenPed	LenAnte-3	LenAnte-4	LenFF	LenFT	LenMF	LenMT	LenHF	LenHT	LenLB1	LenLB2	LenLB3	WidHead	InterOcDi	WidAntPrn	WidPosPrn	WidAbd	WidFF	WidMF	WidHF	xpt1	ypt1	xpt2	ypt2	xpt3	ypt3	xpt4	ypt4	xpt5	ypt5	xpt6	ypt6	xpt7	ypt7	xpt8	ypt8	xpt9	ypt9	xpt15
UCR_ENT 00029369	only 1st segment rest are missing	12.667	11.9736	2.6784	0.7245	1.496	0.6763	1.7958	1.5278	5.45608	N/A	N/A	N/A	5.86998	5.98984	4.35915	5.11334	5.87512	7.04304	0.971083	1.73792	0.490399	1.0985	0.4426	1.5614	3.3052	1.9711	0.2286	0.24	0.2203	0	0	0	-0.7245	0	-1.1824	0	-2.6784	0	-3.3547	0	-5.1505	0	-6.6783	0	-11.9736	0	-12.667	1.1824
UCR_ENT 00009474		13.9459	13.5357	3.0582	0.929	1.564	0.8191	1.912	1.042	7.26049	1.85756	7.63235	2.22983	6.59569	7.10664	5.03192	5.92383	6.86681	8.20384	1.09056	1.96993	0.467735	1.1125	0.5333	1.7107	3.7529	2.3895	0.2204	0.2292	0.2438	0	0	0	-0.929	0	-1.4942	0	-3.0582	0	-3.8773	0	-5.7893	0	-6.8313	0	-13.5357	0	-13.9459	1.4103
UCR_ENT 00019695	no antenna	14.3732	13.5153	3.0359	1.009	1.4528	0.8605	1.8713	1.1386	N/A	N/A	N/A	N/A	6.7716	6.06759	5.05485	6.02849	7.01091	7.77622	1.01018	2.2125	0.513927	1.2516	0.6337	1.6548	3.0105	2.1437	0.275	0.2756	0.2514	0	0	0	-1.009	0	-1.5831	0	-3.0359	0	-3.8964	0	-5.7677	0	-6.9063	0	-13.5153	0	-14.3732	1.6675
UCR_ENT 00069894	LenAnte-4 broken/missing	13.9382	13.4664	3.1178	0.8941	1.724	0.9125	2.0339	0.9843	6.86166	1.87827	5.24594	N/A	6.57747	7.04941	5.07983	5.9538	6.45085	7.89425	0.93263	2.07984	0.380581	1.1913	0.5842	1.5945	3.2474	1.8688	0.2368	0.2674	0.2356	0	0	0	-0.8941	0	-1.3938	0	-3.1178	0	-4.0303	0	-6.0642	0	-7.0485	0	-13.4664	0	-13.9382	1.2262
UCR_ENT 47039	LenAnte-4 missing	13.1134	12.8594	3.1178	0.9989	1.5513	0.7633	1.6326	1.0084	6.48019	1.6484	7.44339	N/A	6.24596	6.78902	4.75537	5.72849	5.99213	7.81619	1.11916	1.89225	0.408994	1.0579	0.5594	1.4656	2.8925	1.7919	0.2298	0.2255	0.214	0	0	0	-0.9989	0	-1.5665	0	-3.1178	0	-3.8811	0	-5.5137	0	-6.5221	0	-12.8594	0	-13.1134	0.9982
		0	0	0	0	0	0	0	0	0	0	0	0	0	0	0	0	0	0	0	0	0	0	0	0	0	0	0	0	0
		0	0	0	0	0	0	0	0	0	0	0	0	0	0	0	0	0	0	0	0	0	0	0	0	0	0	0	0	0
		0	0	0	0	0	0	0	0	0	0	0	0	0	0	0	0	0	0	0	0	0	0	0	0	0	0	0	0	0
		0	0	0	0	0	0	0	0	0	0	0	0	0	0	0	0	0	0	0	0	0	0	0	0	0	0	0	0	0
		0	0	0	0	0	0	0	0	0	0	0	0	0	0	0	0	0	0	0	0	0	0	0	0	0	0	0	0	0
Mean		13.6075	13.0701	3.00162	0.9111	1.55762	0.80634	1.84912	1.14022	6.51461	1.79474	6.77389	2.22983	6.41214	6.6005	4.85622	5.74959	6.43916	7.74671	1.02472	1.97849	0.452327	1.14236	0.55064	1.5974	3.2417	2.033	0.23812	0.24754	0.23302
Standard Deviation		0.696213	0.674305	0.184285	0.114807	0.103135	0.0910067	0.148588	0.224475	0.774262	0.127164	1.32661		0.357697	0.53622	0.307234	0.372526	0.506928	0.427665	0.0787752	0.180568	0.0559166	0.0779059	0.0708437	0.0932836	0.331958	0.238888	0.0214227	0.0226978	0.0156864
Range		1.7062	1.5621	0.4394	0.2845	0.2712	0.2362	0.4013	0.5435	1.80441	0.229879	2.38641	0	0.901619	1.1168	0.720677	0.915146	1.1358	1.1608	0.186526	0.474584	0.133346	0.1937	0.1911	0.2451	0.8604	0.5976	0.0546	0.0501	0.0374																.
Minimum		12.667	11.9736	2.6784	0.7245	1.4528	0.6763	1.6326	0.9843	5.45608	1.6484	5.24594	2.22983	5.86998	5.98984	4.35915	5.11334	5.87512	7.04304	0.93263	1.73792	0.380581	1.0579	0.4426	1.4656	2.8925	1.7919	0.2204	0.2255	0.214
Maximum		14.3732	13.5357	3.1178	1.009	1.724	0.9125	2.0339	1.5278	7.26049	1.87827	7.63235	2.22983	6.7716	7.10664	5.07983	6.02849	7.01091	8.20384	1.11916	2.2125	0.513927	1.2516	0.6337	1.7107	3.7529	2.3895	0.275	0.2756	0.2514
Count		5	5	5	5	5	5	5	5	4	3	3	1	5	5	5	5	5	5	5	5	5	5	5	5	5	5	5	5	5
Females	Notes																														1		2		3		4		5		6		7		8		9		10
SPECIMEN		Total Leng	Clyp-Abd	LenHead	LenAntOc	LenPostOc	LenAntPron	LenPostPron	LenScut	LenScap	LenPed	LenAnte-3	LenAnte-4	LenFF	LenFT	LenMF	LenMT	LenHF	LenHT	LenLB1	LenLB2	LenLB3	WidHead	InterOcDi	WidAntPrn	WidPosPrn	WidAbd	WidFF	WidMF	WidHF	xpt1	ypt1	xpt2	ypt2	xpt3	ypt3	xpt4	ypt4	xpt5	ypt5	xpt6	ypt6	xpt7	ypt7	xpt8	ypt8	xpt9	ypt9	xpt15
UCR_ENT 00019697	no antenna. Legs are hard to see	17.2148	16.9386	3.382	0.9836	1.7691	0.809	2.6568	1.5602	N/A	N/A	N/A	N/A	N/A	N/A	N/A	N/A	N/A	N/A	1.28605	2.55242	0.664503	1.2783	0.708	1.9786	4.7028	4.1402	N/A	N/A	N/A	0	0	0	-0.9836	0	-1.6129	0	-3.382	0	-4.191	0	-6.8478	0	-8.408	0	-16.9386	0	-17.2148	2.406
UCR_ENT 00019696	miss F legs on both sides. Only 1st segment rest are missing.	18.0029	17.4174	3.4379	0.9131	2.06	N/A	2.2924	1.811	8.10418	N/A	N/A	N/A	N/A	N/A	5.44596	6.83502	7.74214	9.43433	1.20964	2.51342	0.651376	1.3729	0.6795	1.4478	4.4393	2.4124	N/A	0.3715	0.3004	0	0	0	-0.9131	0	-1.3779	0	-3.4379	0	-3.9719	0	-6.2643	0	-8.0753	0	-17.4174	0	-18.0029	0.5258
UCR_ENT 00019698	LenAnte-4 missing. Missing F leg	18.3191	17.8194	3.7509	1.1481	1.9843	0.9036	2.5985	1.4313	7.90156	2.05672	7.22432	N/A	N/A	N/A	6.04556	7.21162	7.90071	9.7413	1.22457	2.47095	0.631602	1.2872	0.6064	2.0307	4.6723	3.3407	N/A	0.3943	0.3137	0	0	0	-1.1481	0	-1.7666	0	-3.7509	0	-4.6545	0	-7.253	0	-8.6843	0	-17.8194	0	-18.3191	2.0218
		0	0	0	0	0	0	0	0	0	0	0	0	0	0	0	0	0	0	0	0	0	0	0	0	0	0	0	0	0
		0	0	0	0	0	0	0	0	0	0	0	0	0	0	0	0	0	0	0	0	0	0	0	0	0	0	0	0	0
		0	0	0	0	0	0	0	0	0	0	0	0	0	0	0	0	0	0	0	0	0	0	0	0	0	0	0	0	0
		0	0	0	0	0	0	0	0	0	0	0	0	0	0	0	0	0	0	0	0	0	0	0	0	0	0	0	0	0
		0	0	0	0	0	0	0	0	0	0	0	0	0	0	0	0	0	0	0	0	0	0	0	0	0	0	0	0	0
		0	0	0	0	0	0	0	0	0	0	0	0	0	0	0	0	0	0	0	0	0	0	0	0	0	0	0	0	0
		0	0	0	0	0	0	0	0	0	0	0	0	0	0	0	0	0	0	0	0	0	0	0	0	0	0	0	0	0
Mean		17.8456	17.3918	3.5236	1.01493	1.9378	0.8563	2.5159	1.60083	8.00287	2.05672	7.22432	#DIV/0!	#DIV/0!	#DIV/0!	5.74576	7.02332	7.82143	9.58782	1.24008	2.51226	0.64916	1.3128	0.664633	1.81903	4.6048	3.29777	#DIV/0!	0.3829	0.30705
Standard Deviation		0.568707	0.440958	0.198822	0.120593	0.150922	0.0668923	0.195739	0.193084	0.143272	#DIV/0!	#DIV/0!	#DIV/0!	#DIV/0!	#DIV/0!	0.423982	0.266296	0.112129	0.217064	0.0404989	0.0407501	0.016562	0.052238	0.0524061	0.322551	0.144136	0.8647	#DIV/0!	0.016122	0.00940452
Range		1.1043	0.8808	0.3689	0.235	0.2909	0.0946	0.3644	0.3797	0.202618	0	0	0	0	0	0.5996	0.3766	0.158574	0.306975	0.0764077	0.0814756	0.032901	0.0946	0.1016	0.5829	0.2635	1.7278	0	0.0228	0.0133
Minimum		17.2148	16.9386	3.382	0.9131	1.7691	0.809	2.2924	1.4313	7.90156	2.05672	7.22432	0	0	0	5.44596	6.83502	7.74214	9.43433	1.20964	2.47095	0.631602	1.2783	0.6064	1.4478	4.4393	2.4124	0	0.3715	0.3004
Maximum		18.3191	17.8194	3.7509	1.1481	2.06	0.9036	2.6568	1.811	8.10418	2.05672	7.22432	0	0	0	6.04556	7.21162	7.90071	9.7413	1.28605	2.55242	0.664503	1.3729	0.708	2.0307	4.7028	4.1402	0	0.3943	0.3137
Count		3	3	3	3	3	2	3	3	2	1	1	0	0	0	2	2	2	2	3	3	3	3	3	3	3	3	0	2	2
[truncated: 69 more columns]

## Sheet: bahiaensis
	Males	Notes																														1		2		3		4		5		6		7		8		9
	SPECIMEN		Total Leng	Clyp-Abd	LenHead	LenAntOc	LenPostOc	LenAntPron	LenPostPron	LenScut	LenScap	LenPed	LenAnte-3	LenAnte-4	LenFF	LenFT	LenMF	LenMT	LenHF	LenHT	LenLB1	LenLB2	LenLB3	WidHead	InterOcDi	WidAntPrn	WidPosPrn	WidAbd	WidFF	WidMF	WidHF	xpt1	ypt1	xpt2	ypt2	xpt3	ypt3	xpt4	ypt4	xpt5	ypt5	xpt6	ypt6	xpt7	ypt7	xpt8	ypt8	xpt9	ypt9
	UCR_ENT 00071255	LenAnte-4 missing.	12.3501	9.083	2.4047	0.7766	1.1391	0.7519	1.4732	0.7861	5.97172	1.52653	N/A	N/A	5.83245	6.59245	4.09316	5.26677	N/A	N/A	0.840419	1.48543	0.465507	1.0611	0.5416	1.2484	2.3139	1.6332	0.2331	0.2299	N/A	0	0	0	-0.7766	0	-1.2656	0	-2.4047	0	-3.1566	0	-4.6298	0	-5.4159	0	-9.083	0	-12.3501
			0	0	0	0	0	0	0	0	0	0	0	0	0	0	0	0	0	0	0	0	0	0	0	0	0	0	0	0	0
			0	0	0	0	0	0	0	0	0	0	0	0	0	0	0	0	0	0	0	0	0	0	0	0	0	0	0	0	0
			0	0	0	0	0	0	0	0	0	0	0	0	0	0	0	0	0	0	0	0	0	0	0	0	0	0	0	0	0
			0	0	0	0	0	0	0	0	0	0	0	0	0	0	0	0	0	0	0	0	0	0	0	0	0	0	0	0	0
			0	0	0	0	0	0	0	0	0	0	0	0	0	0	0	0	0	0	0	0	0	0	0	0	0	0	0	0	0
			0	0	0	0	0	0	0	0	0	0	0	0	0	0	0	0	0	0	0	0	0	0	0	0	0	0	0	0	0
			0	0	0	0	0	0	0	0	0	0	0	0	0	0	0	0	0	0	0	0	0	0	0	0	0	0	0	0	0
			0	0	0	0	0	0	0	0	0	0	0	0	0	0	0	0	0	0	0	0	0	0	0	0	0	0	0	0	0
			0	0	0	0	0	0	0	0	0	0	0	0	0	0	0	0	0	0	0	0	0	0	0	0	0	0	0	0	0
	Mean		12.3501	9.083	2.4047	0.7766	1.1391	0.7519	1.4732	0.7861	5.97172	1.52653	#DIV/0!	#DIV/0!	5.83245	6.59245	4.09316	5.26677	#DIV/0!	#DIV/0!	0.840419	1.48543	0.465507	1.0611	0.5416	1.2484	2.3139	1.6332	0.2331	0.2299	#DIV/0!
	Standard Deviation		#DIV/0!	#DIV/0!	#DIV/0!	#DIV/0!	#DIV/0!	#DIV/0!	#DIV/0!	#DIV/0!	#DIV/0!	#DIV/0!	#DIV/0!	#DIV/0!	#DIV/0!	#DIV/0!	#DIV/0!	#DIV/0!	#DIV/0!	#DIV/0!	#DIV/0!	#DIV/0!	#DIV/0!	#DIV/0!	#DIV/0!	#DIV/0!	#DIV/0!	#DIV/0!	#DIV/0!	#DIV/0!	#DIV/0!
	Range		0	0	0	0	0	0	0	0	0	0	0	0	0	0	0	0	0	0	0	0	0	0	0	0	0	0	0	0	0																.
	Minimum		12.3501	9.083	2.4047	0.7766	1.1391	0.7519	1.4732	0.7861	5.97172	1.52653	0	0	5.83245	6.59245	4.09316	5.26677	0	0	0.840419	1.48543	0.465507	1.0611	0.5416	1.2484	2.3139	1.6332	0.2331	0.2299	0
	Maximum		12.3501	9.083	2.4047	0.7766	1.1391	0.7519	1.4732	0.7861	5.97172	1.52653	0	0	5.83245	6.59245	4.09316	5.26677	0	0	0.840419	1.48543	0.465507	1.0611	0.5416	1.2484	2.3139	1.6332	0.2331	0.2299	0
	Count		1	1	1	1	1	1	1	1	1	1	0	0	1	1	1	1	0	0	1	1	1	1	1	1	1	1	1	1	0
	Females																															1		2		3		4		5		6		7		8		9
	SPECIMEN		Total Leng	Clyp-Abd	LenHead	LenAntOc	LenPostOc	LenAntPron	LenPostPron	LenScut	LenScap	LenPed	LenAnte-3	LenAnte-4	LenFF	LenFT	LenMF	LenMT	LenHF	LenHT	LenLB1	LenLB2	LenLB3	WidHead	InterOcDi	WidAntPrn	WidPosPrn	WidAbd	WidFF	WidMF	WidHF	xpt1	ypt1	xpt2	ypt2	xpt3	ypt3	xpt4	ypt4	xpt5	ypt5	xpt6	ypt6	xpt7	ypt7	xpt8	ypt8	xpt9	ypt9
			0	0	0	0	0	0	0	0	0	0	0	0	0	0	0	0	0	0	0	0	0	0	0	0	0	0	0	0	0
			0	0	0	0	0	0	0	0	0	0	0	0	0	0	0	0	0	0	0	0	0	0	0	0	0	0	0	0	0
			0	0	0	0	0	0	0	0	0	0	0	0	0	0	0	0	0	0	0	0	0	0	0	0	0	0	0	0	0
			0	0	0	0	0	0	0	0	0	0	0	0	0	0	0	0	0	0	0	0	0	0	0	0	0	0	0	0	0
			0	0	0	0	0	0	0	0	0	0	0	0	0	0	0	0	0	0	0	0	0	0	0	0	0	0	0	0	0
			0	0	0	0	0	0	0	0	0	0	0	0	0	0	0	0	0	0	0	0	0	0	0	0	0	0	0	0	0
			0	0	0	0	0	0	0	0	0	0	0	0	0	0	0	0	0	0	0	0	0	0	0	0	0	0	0	0	0
			0	0	0	0	0	0	0	0	0	0	0	0	0	0	0	0	0	0	0	0	0	0	0	0	0	0	0	0	0
			0	0	0	0	0	0	0	0	0	0	0	0	0	0	0	0	0	0	0	0	0	0	0	0	0	0	0	0	0
			0	0	0	0	0	0	0	0	0	0	0	0	0	0	0	0	0	0	0	0	0	0	0	0	0	0	0	0	0
	Mean		0	0	0	0	0	0	0	0	0	0	0	0	0	0	0	0	0	0	0	0	0	0	0	0	0	0	0	0	0
	Standard Deviation		0	0	0	0	0	0	0	0	0	0	0	0	0	0	0	0	0	0	0	0	0	0	0	0	0	0	0	0	0
	Range		0	0	0	0	0	0	0	0	0	0	0	0	0	0	0	0	0	0	0	0	0	0	0	0	0	0	0	0	0
	Minimum		0	0	0	0	0	0	0	0	0	0	0	0	0	0	0	0	0	0	0	0	0	0	0	0	0	0	0	0	0
	Maximum		0	0	0	0	0	0	0	0	0	0	0	0	0	0	0	0	0	0	0	0	0	0	0	0	0	0	0	0	0
	Count		5	5	5	5	5	5	5	5	5	5	5	5	5	5	5	5	5	5	5	5	5	5	5	5	5	5	5	5	5
[truncated: 70 more columns]

[truncated: 59 more sheets: banksi, cervicalis, chamaeleon, championi, conjungens, cordazulus, errans, erythrocephalus, exsanguis, fasciatus, filicauda, fuliginatus, gilboventris, gracilipes, grandoculus, grassans, illotus, impar, inconstans, janus …]
